# Supplementary material
Source: publisher figshare collection journal article supplement (https://springernature.figshare.com/ndownloader/files/11862077)
Supplement: Supplementary file 1 [file 11862077]

## Sheet: Reaction List
Abbreviation	Description	Reaction	GPR	Genes	Proteins	Subsystem	Reversible	Lower bound	Upper bound	Objective	Confidence Score	EC Number	Notes	References
r1	glucokinase, transcriptional regulator	ATP[c] + alpha-D-Glucose[c] => ADP[c] + alpha-g6p[c]	(SACE_1700) or (SACE_7183)	SACE_1700,SACE_7183		Glycolysis	0	0	1000	0	2	2.7.1.2
r2	polyphosphate glucokinase	2 Phosphate[c] + alpha-D-Glucose[c] => Phosphate[c] + alpha-g6p[c]	(SACE_1802 )	SACE_1802		Glycolysis	0	0	0	0	2	2.7.1.63
r3	glucose-6-phosphate isomerase	alpha-g6p[c] <=> beta-f6p[c]	(SACE_2158)	SACE_2158		Glycolysis	1	-1000	1000	0	2	5.3.1.9
r4	6-phosphofructokinase	ADP[c] + beta-fdp[c] => ATP[c] + beta-f6p[c]	(SACE_1704)	SACE_1704		Glycolysis	0	0	1000	0	2	2.7.1.11
r5	D-fructose-6-phosphate 1-phosphotransferase	2 Phosphate[c] + beta-f6p[c] => Phosphate[c] + beta-fdp[c]	(SACE_1704)	SACE_1704		Glycolysis	0	0	0	0	2	2.7.1.90
r6	tagatose-bisphosphate aldolase	beta-fdp[c] <=> dhap[c] + g3p_D[c]	(SACE_2420) or (SACE_6318) or (SACE_7180)	SACE_2420,SACE_6318,SACE_7180		Glycolysis	1	-1000	1000	0	2	4.1.2.13
r7	glyceraldehyde 3-phosphate dehydrogenase	g3p_D[c] + Orthophosphate[c] + NAD[c] => 13dgp[c] + NADH[c] + H[c]	(SACE_2143)	SACE_2143		Glycolysis	0	0	1000	0	2	1.2.1.12
r8	glyceraldehyde 3-phosphate dehydrogenase	g3p_D[c] + Orthophosphate[c] + NADP[c] => 13dgp[c] + NADPH[c] + H[c]	(SACE_2143)	SACE_2143		Glycolysis	0	0	0	0	2	1.2.1.12
r9	phosphoglycerate kinase	ADP[c] + 13dgp[c] <=> ATP[c] + 3-Phospho-D-glycerate[c]	(SACE_2144)	SACE_2144		Glycolysis	1	-1000	1000	0	2	2.7.2.3
r10	2,3-bisphosphoglycerate-dependent phosphoglycerate mutase	3-Phospho-D-glycerate[c] <=> 2-Phospho-D-glycerate[c]	(SACE_1433) or (SACE_6967) or (SACE_0153) or (SACE_1584) or (SACE_3448) or (SACE_5412) or (SACE_6422)	SACE_1433,SACE_6967,SACE_0153,SACE_1584,SACE_3448,SACE_5412,SACE_6422		Glycolysis	1	-1000	1000	0	2	5.4.2.11 5.4.2.12
r11	phosphopyruvate hydratase	2-Phospho-D-glycerate[c] => Phosphoenolpyruvate[c] + H2O[c]	(SACE_0838)	SACE_0838		Glycolysis	0	0	1000	0	2	4.2.1.11
r12	pyruvate kinase	ADP[c] + Phosphoenolpyruvate[c] => ATP[c] + Pyruvate[c]	(SACE_5720)	SACE_5720		Glycolysis	0	0	1000	0	2	2.7.1.40
r13	pyruvate kinase	GDP[c] + Phosphoenolpyruvate[c] => GTP[c] + Pyruvate[c]	(SACE_5720)	SACE_5720		Glycolysis	0	0	0	0	2	2.7.1.40
r14	pyruvate kinase	CDP[c] + Phosphoenolpyruvate[c] => CTP[c] + Pyruvate[c]	(SACE_5720)	SACE_5720		Glycolysis	0	0	0	0	2	2.7.1.40
r15	pyruvate kinase	UDP[c] + Phosphoenolpyruvate[c] => UTP[c] + Pyruvate[c]	(SACE_5720)	SACE_5720		Glycolysis	0	0	0	0	2	2.7.1.40
r16	pyruvate kinase	IDP[c] + Phosphoenolpyruvate[c] => ITP[c] + Pyruvate[c]	(SACE_5720)	SACE_5720		Glycolysis	0	0	0	0	2	2.7.1.40
r17	pyruvate kinase	dADP[c] + Phosphoenolpyruvate[c] => dATP[c] + Pyruvate[c]	(SACE_5720)	SACE_5720		Glycolysis	0	0	0	0	2	2.7.1.40
r18	pyruvate kinase	dGDP[c] + Phosphoenolpyruvate[c] => dGTP[c] + Pyruvate[c]	(SACE_5720)	SACE_5720		Glycolysis	0	0	0	0	2	2.7.1.40
r19	pyruvate kinase	NDP[c] + Phosphoenolpyruvate[c] => NTP[c] + Pyruvate[c]	(SACE_5720)	SACE_5720		Glycolysis	0	0	0	0	2	2.7.1.40
r20	aldose-1-epimerase	alpha-D-Glucose[c] <=> beta-D-Glucose[c]	(SACE_0644) or (SACE_3904)	SACE_0644,SACE_3904		Glycolysis	1	-1000	1000	0	2	5.1.3.3
r21	glucokinase, transcriptional regulator	ATP[c] + beta-D-Glucose[c] => ADP[c] + alpha-g6p[c]	(SACE_1700) or (SACE_2869) or (SACE_7183)	SACE_1700,SACE_2869,SACE_7183		Glycolysis	0	0	1000	0	2	2.7.1.2
r22	polyphosphate glucokinase	Phosphate[c] + beta-D-Glucose[c] => alpha-g6p[c] + H2O[c]	(SACE_1802)	SACE_1802		Glycolysis	0	0	1000	0	2	2.7.1.63
r23	SACE_15896-phospho-beta-glucosidase	arbt6p[c] + H2O[c] <=> p-Benzenediol[c] + alpha-g6p[c]	(SACE_1589)	SACE_1589		Glycolysis	1	-1000	1000	0	2	3.2.1.86
r24	Protein-N(pai)-phosphohistidine:sugar N(pai)-phosphotransferase	ATP[c] + Salicin[c] => ADP[c] + salc6p[c]				Glycolysis	0	0	1000	0	2	2.7.1.69	reaaction added for salicin import
r25	SACE_15896-phospho-beta-glucosidase	salc6p[c] + H2O[c] => alpha-g6p[c] +Saligenin[c]	(SACE_1589)	SACE_1589		Glycolysis	0	0	1000	0	2	3.2.1.86
r26	glucose-6-phosphate isomerase	alpha-g6p[c] <=> beta-g6p[c]	(SACE_2158)	SACE_2158		Glycolysis	1	-1000	1000	0	2	5.3.1.9
r27	fructose 1,6-bisphosphatase II	beta-fdp[c] + H2O[c] => beta-f6p[c] + Orthophosphate[c]	(SACE_0934)	SACE_0934		Glycolysis	0	0	1000	0	2	3.1.3.11
r28	triosephosphate isomerase	g3p_D[c] <=> dhap[c]	(SACE_2145)	SACE_2145		Glycolysis	1	-1000	1000	0	2	5.3.1.1
r29	pyruvate carboxylase	ATP[c] + Pyruvate[c] + HCO3[c] => ADP[c] + Orthophosphate[c] + Oxaloacetate[c]	(SACE_6118)	SACE_6118		Glycolysis	0	0	1000	0	2	6.4.1.1
r30	NADP-dependent alcohol dehydrogenase	Ethanol[c] + NADP[c] => Acetaldehyde[c] + NADPH[c] + H[c]	(SACE_1843) or (SACE_2652)	SACE_1843,SACE_2652		Glycolysis	0	0	0	0	2	1.1.1.2
r31	citrate (Si) synthase	Acetyl-CoA[c] + H2O[c] + Oxaloacetate[c] => Citrate[c] + CoA[c]	(SACE_0632) or (SACE_0633) or (SACE_0649)	SACE_0632,SACE_0633,SACE_0649		TCA cycle	0	0	1000	0	2	2.3.3.1
r32	aconitate hydratase	Citrate[c] <=> cis-Aconitate[c] + H2O[c]	(SACE_3754) or (SACE_3811) or (SACE_4339)	SACE_3754,SACE_3811,SACE_4339		TCA cycle	1	-1000	1000	0	2	4.2.1.3
r33	aconitate hydratase	cis-Aconitate[c] + H2O[c] <=> Isocitrate[c]	(SACE_3754) or (SACE_3811) or (SACE_4339)	SACE_3754,SACE_3811,SACE_4339		TCA cycle	1	-1000	1000	0	2	4.2.1.3
r34	Isocitrate:NAD oxidoreductase （decarboxylating)	Isocitrate[c] + NAD[c] => 2-Oxoglutarate[c] + CO2[c] + NADH[c] + H[c]				TCA cycle	0	0	1000	0	2	1.1.1.41, 1.1.1.286	reaction added and reversibility fixed to 1 to avoid CO2 fixation
r35	isocitrate dehydrogenase	Isocitrate[c] + NADP[c] => 2-Oxoglutarate[c] + CO2[c] + NADPH[c] + H[c]	(SACE_6636)	SACE_6636		TCA cycle	0	0	0	0	2	1.1.1.42
r36	isocitrate dehydrogenase	Oxalosuccinate[c] <=> 2-Oxoglutarate[c] + CO2[c]	(SACE_6636)	SACE_6636		TCA cycle	0	0	1000	0	2	1.1.1.42
r37	2-oxoglutarate dehydrogenase E1 component	2-Oxoglutarate[c] + thmpp[c] => 3-Carboxy-1-hydroxypropyl-ThPP[c] + CO2[c]				TCA cycle	0	0	1000	0	2	1.2.4.2	reaction added for gap filling
r38	2-oxoglutarate dehydrogenase E1 component	3-Carboxy-1-hydroxypropyl-ThPP[c] + N6-(lipoyl)lysine(Enzyme)[c] => S-Succinyldihydrolipoamide-E[c] + thmpp[c]				TCA cycle	0	0	1000	0	2	1.2.4.2	reaction added for gap filling
r39	SACE_39262-oxoglutarate ferredoxin oxidoreductase, beta subunit	2 fdxox[c] + 2-Oxoglutarate[c] + CoA[c] => 2 fdxrd[c] + Succinyl-CoA[c] + CO2[c] + 2 H[c]	(SACE_3926 and SACE_3927)	SACE_3926,SACE_3927		TCA cycle	0	0	1000	0	2	1.2.7.3 1.2.7.11
r40	SACE_6668succinyl-CoA synthetase subunit alpha	ADP[c] + Orthophosphate[c] + Succinyl-CoA[c] <=> ATP[c] + Succinate[c] + CoA[c]	(SACE_6668 and SACE_6669)	SACE_6668,SACE_6669		TCA cycle	0	0	1000	0	2	6.2.1.5
r41	acetyl-CoA hydrolase/transferase	Succinyl-CoA[c] + Acetate[c] => Acetyl-CoA[c] + Succinate[c]	(SACE_5861)	SACE_5861		TCA cycle	0	0	1000	0	2	2.8.3.18
r42	succinate dehydrogenase flavoprotein subunit	Succinate[c] + Quinone[c] <=> Fumarate[c] + Hydroquinone[c]	(SACE_1170 and SACE_1171 and SACE_6582 and SACE_6583 and SACE_6584 and SACE_6585)	SACE_1170,SACE_1171,SACE_6582,SACE_6583,SACE_6584,SACE_6585		TCA cycle	1	-1000	1000	0	2	1.3.5.4 1.3.5.1
r43	fumarate hydratase	Fumarate[c] + H2O[c] <=> (S)-Malate[c]	(SACE_0930) or (SACE_1784)	SACE_0930,SACE_1784		TCA cycle	1	-1000	1000	0	2	4.2.1.2
r44	malate dehydrogenase	(S)-Malate[c] + NAD[c] <=> Oxaloacetate[c] + NADH[c] + H[c]	(SACE_3674)	SACE_3674		TCA cycle	1	-1000	1000	0	2	1.1.1.37
r45	malate dehydrogenase (quinone)	(S)-Malate[c] + Quinone[c] => Oxaloacetate[c] + Hydroquinone[c]	(SACE_1951)	SACE_1951		TCA cycle	0	0	0	0	2	1.1.5.4
r46	malate dehydrogenase (quinone)	(S)-Malate[c] + O2 => Oxaloacetate[c] + H2O2[c]	(SACE_1951)	SACE_1951		TCA cycle	0	0	0	0	2	1.1.5.4
r47	SACE_1951hypothetical protein	(S)-Malate[c] + FAD[c] => FADH2[c] + Oxaloacetate[c]	(SACE_1951)	SACE_1951		TCA cycle	0	0	0	0	2	1.1.5.4
r48	phosphoenolpyruvate carboxykinase	GTP[c] + Oxaloacetate[c] => GDP[c] + Phosphoenolpyruvate[c] + CO2[c]	(SACE_7274)	SACE_7274		TCA cycle	0	0	1000	0	2	4.1.1.32
r49	phosphoenolpyruvate carboxykinase	ITP[c] + Oxaloacetate[c] => IDP[c] + Phosphoenolpyruvate[c] + CO2[c]	(SACE_7274)	SACE_7274		TCA cycle	0	0	1000	0	2	4.1.1.32
r50	acetolactate synthase large subunit	Pyruvate[c] + thmpp[c] => 2ahethmpp[c] + CO2[c]	(SACE_1532 and SACE_2406 and SACE_2407 and SACE_3952 and SACE_3953 and SACE_4754 and SACE_4755 and SACE_5542 and SACE_5543 and SACE_5675 and SACE_5676 and SACE_7294 and SACE_7295)	SACE_1532,SACE_2406,SACE_2407,SACE_3952,SACE_3953,SACE_4754,SACE_4755,SACE_5542,SACE_5543,SACE_5675,SACE_5676,SACE_7294,SACE_7295		TCA cycle	0	0	1000	0	2	1.2.4.1
r51	pyruvate dehydrogenase subunit E1	2ahethmpp[c] + N6-(lipoyl)lysine(Enzyme)[c] => S-Acetyldihydrolipoamide-E[c] + thmpp[c]	(SACE_1532 and SACE_2406 and SACE_2407 and SACE_3952 and SACE_3953 and SACE_4754 and SACE_4755 and SACE_5542 and SACE_5543 and SACE_5675 and SACE_5676 and SACE_7294 and SACE_7295)	SACE_1532,SACE_2406,SACE_2407,SACE_3952,SACE_3953,SACE_4754,SACE_4755,SACE_5542,SACE_5543,SACE_5675,SACE_5676,SACE_7294,SACE_7295		TCA cycle	0	0	1000	0	2	1.2.4.1
r52	SACE_2405pyruvate dehydrogenase, E2 component,dihydrolipoamide acetyltransferase	Acetyl-CoA[c] + N6-(dihydrolipoyl)lysine(Enzyme)[c] <=> CoA[c] + S-Acetyldihydrolipoamide-E[c]	(SACE_2405 and SACE_3954 and SACE_4756 and SACE_5544 and SACE_5674 and SACE_7296)	SACE_2405,SACE_3954,SACE_4756,SACE_5544,SACE_5674,SACE_7296		TCA cycle	1	-1000	1000	0	2	2.3.1.12
r53	dihydrolipoamide dehydrogenase	N6-(dihydrolipoyl)lysine(Enzyme)[c] + NAD[c] <=> N6-(lipoyl)lysine(Enzyme)[c] + NADH[c] + H[c]	(SACE_1639) or (SACE_5677) or (SACE_6526)	SACE_1639,SACE_5677,SACE_6526		TCA cycle	0	0	0	0	2	1.8.1.4
r54	dihydrolipoamide succinyltransferase	Succinyl-CoA[c] + N6-(dihydrolipoyl)lysine(Enzyme)[c] <=> CoA[c] + S-Succinyldihydrolipoamide-E[c]	(SACE_1638)	SACE_1638		TCA cycle	0	0	0	0	2	2.3.1.61
r55	2-oxoglutarate ferredoxin oxidoreductase, alpha subunit	2 fdxox[c] + Pyruvate[c] + CoA[c] => 2 fdxrd[c] + Acetyl-CoA[c] + CO2[c] + 2 H[c]	(SACE_3926 and SACE_3927)	SACE_3926,SACE_3927		TCA cycle	0	0	1000	0	2	1.2.7.11
r56	SACE_1042citrate (pro-3S)-lyase beta subunit	Citrate[c] => Acetate[c] + Oxaloacetate[c]	(SACE_1042 and SACE_2331 and SACE_4398 and SACE_4581)	SACE_1042,SACE_2331,SACE_4398,SACE_4581		TCA cycle	0	0	1000	0	2	4.1.3.6
r57	glucose-6-phosphate 1-dehydrogenase	alpha-g6p[c] + NADP[c] => 6pgl[c] + NADPH[c] + H[c]	(SACE_2157)	SACE_2157		Pentose phosphate pathway	0	0	1000	0	2	1.1.1.49 1.1.1.363
r58	glucose-6-phosphate 1-dehydrogenase	alpha-g6p[c] + NAD[c] => 6pgl[c] + NADH[c] + H[c]	(SACE_2157)	SACE_2157		Pentose phosphate pathway	0	0	0	0	2	1.1.1.363
r59	6-phosphogluconolactonase	6pgl[c] + H2O[c] => 6-Phospho-D-gluconate[c]	(SACE_2155)	SACE_2155		Pentose phosphate pathway	0	0	1000	0	2	3.1.1.31
r60	6-phosphogluconate dehydrogenase-like protein	6-Phospho-D-gluconate[c] + NADP[c] => ru5p_D[c] + CO2[c] + NADPH[c] + H[c]	(SACE_0004) or (SACE_4396)	SACE_0004,SACE_4396		Pentose phosphate pathway	0	0	1000	0	2	1.1.1.44
r61	6-phosphogluconate dehydrogenase	6-Phospho-D-gluconate[c] + NAD[c] => ru5p_D[c] + CO2[c] + NADH[c] + H[c]	(SACE_0004) or (SACE_4396)	SACE_0004,SACE_4396		Pentose phosphate pathway	0	0	0	0	2	1.1.1.343
r62	ribose-5-phosphate isomerase B	ru5p_D[c] <=> r5p_D[c]	(SACE_1349) or (SACE_4764) or (SACE_5216)	SACE_1349,SACE_4764,SACE_5216		Pentose phosphate pathway	1	-1000	1000	0	2	5.3.1.6
r63	ribose-phosphate pyrophosphokinase	ATP[c] + r5p_D[c] => AMP[c] + prpp[c]	(SACE_0816) or (SACE_2398)	SACE_0816,SACE_2398		Pentose phosphate pathway	1	-1000	1000	0	2	2.7.6.1
r64	ribokinase	ADP[c] + r5p_D[c] <=> ATP[c] + D-Ribose[c]	(SACE_1271) or (SACE_3234)	SACE_1271,SACE_3234		Pentose phosphate pathway	1	-1000	1000	0	2	2.7.1.15
r65	transketolase	beta-f6p[c] + g3p_D[c] <=> e4p[c] + xu5p_D[c]	(SACE_2160) or (SACE_3326) or (SACE_4350 and SACE_4351) or (SACE_5762 and SACE_5763)	SACE_2160,SACE_3326,SACE_4350,SACE_4351,SACE_5762,SACE_5763		Pentose phosphate pathway	1	-1000	1000	0	2	2.2.1.1
r66	ribulose-phosphate 3-epimerase	xu5p_D[c] <=> ru5p_D[c]	(SACE_2120)	SACE_2120		Pentose phosphate pathway	1	-1000	1000	0	2	5.1.3.1
r67	transaldolase	s7p[c] + g3p_D[c] <=> e4p[c] + beta-f6p[c]	(SACE_2159)	SACE_2159		Pentose phosphate pathway	1	-1000	1000	0	2	2.2.1.2
r68	transketolase	s7p[c] + g3p_D[c] <=> r5p_D[c] + xu5p_D[c]	(SACE_2160) or (SACE_3326) or (SACE_4350 and SACE_4351) or (SACE_5762 and SACE_5763)	SACE_2160,SACE_3326,SACE_4350,SACE_4351,SACE_5762,SACE_5763		Pentose phosphate pathway	1	-1000	1000	0	2	2.2.1.1
r69	xylulose-5-phosphate/fructose-6-phosphate phosphoketolase	xu5p_D[c] + Orthophosphate[c] => actp[c] + g3p_D[c] + H2O	(SACE_1921)	SACE_1921		Pentose phosphate pathway	0	0	1000	0	2	4.1.2.9
r70	putative deoxyribose-phosphate aldolase	g3p_D[c] + Acetaldehyde[c] <=> 2dr5p[c]	(SACE_6564)	SACE_6564		Pentose phosphate pathway	1	-1000	1000	0	2	4.1.2.4
r71	ribokinase	2dr5p[c] + ADP[c] <=> Deoxyribose[c] + ATP[c]	(SACE_1271) or (SACE_3234)	SACE_1271,SACE_3234		Pentose phosphate pathway	1	-1000	1000	0	2	2.7.1.15
r72	SACE_3449gluconolactonase precursor	g15lac[c] + H2O[c] => glcn[c]	(SACE_3449) or (SACE_3789)	SACE_3449,SACE_3789		Pentose phosphate pathway	0	0	1000	0	2	3.1.1.17
r73	SACE_3356carbohydrate kinase, thermoresistant glucokinase	ATP[c] + glcn[c] => ADP[c] + 6-Phospho-D-gluconate[c]	(SACE_3356)	SACE_3356		Pentose phosphate pathway	0	0	1000	0	2	2.7.1.12
r74	phosphogluconate dehydratase	6-Phospho-D-gluconate[c] => 2ddg6p[c] + H2O[c]	(SACE_1740)	SACE_1740		Pentose phosphate pathway	0	0	1000	0	2	4.2.1.12
r75	SACE_1921putative phosphoketolase	beta-f6p[c] + Orthophosphate[c] => actp[c] + e4p[c] + H2O[c]	(SACE_1921)	SACE_1921		Pentose phosphate pathway	0	0	1000	0	2	4.1.2.22
r76	tagatose-bisphosphate aldolase	dhap[c] + e4p[c] => s17bp[c]	(SACE_6318) or (SACE_7180)	SACE_6318,SACE_7180		Pentose phosphate pathway	0	0	1000	0	2	4.1.2.13
r77	KHG/KDPG aldolase	2ddg6p[c] <=> g3p_D[c] + Pyruvate[c]	(SACE_1739) or (SACE_4936) or (SACE_5973)	SACE_1739,SACE_4936,SACE_5973		Pentose and glucuronate interconversions	1	-1000	1000	0	2	4.1.2.14 4.1.3.16
r78	2-keto-3-deoxygluconate kinase	ATP[c] + 2ddglcn[c] => ADP[c] + 2ddg6p[c]	(SACE_4935) or (SACE_5974)	SACE_4935,SACE_5974		Pentose and glucuronate interconversions	0	0	1000	0	2	2.7.1.45
r79	D-mannonate hydro-lyase	2ddglcn[c] + H2O[c] <=> D-Mannonate[c]	(SACE_4937) or (SACE_5057)	SACE_4937,SACE_5057		Pentose and glucuronate interconversions	1	-1000	1000	0	2	4.2.1.8	reaction added for gap filling
r80	SACE_4940fructuronate reductase	D-Mannonate[c] + NAD[c] <=> D-Fructuronate[c] + NADH[c] + H[c]	(SACE_4940) or (SACE_5054)	SACE_4940,SACE_5054		Pentose and glucuronate interconversions	1	-1000	1000	0	2	1.1.1.57
r81	hexuronic acid isomerase	D-Fructuronate[c] <=> D-Glucuronate[c]	(SACE_5055)	SACE_5055		Pentose and glucuronate interconversions	1	-1000	1000	0	2	5.3.1.12
r82	hexuronic acid isomerase	D-Galacturonate[c] => D-Tagaturonate[c]	(SACE_5055)	SACE_5055		Pentose and glucuronate interconversions	0	0	1000	0	2	5.3.1.12
r83	tagaturonate reductase	D-Tagaturonate[c] + NAD[c] => D-Altronate[c] + NADH[c] + H[c]				Pentose and glucuronate interconversions	0	0	1000	0	2	1.1.1.58
r84	SACE_1823fa oxidation complex alpha subunit	D-Altronate[c] <=> 2ddglcn[c] + H2O[c]	(SACE_5173)	SACE_5173		Pentose and glucuronate interconversions	1	-1000	1000	0	2	4.2.1.7
r85	2-deoxy-D-gluconate 3-dehydrogenase	2ddglcn[c] + NAD[c] <=> 46dh25dohxn[c] + NADH[c] + H[c]	(SACE_0380)	SACE_0380		Pentose and glucuronate interconversions	1	-1000	1000	0	2	1.1.1.125
r86	UTP--glucose-1-phosphate uridylyltransferase	UTP[c] + g1p[c] <=> Diphosphate[c] + udpg[c]	(SACE_0774)	SACE_0774		Pentose and glucuronate interconversions	1	-1000	1000	0	2	2.7.7.9
r87	udpg 6-dehydrogenase protein	udpg[c] + H2O[c] + 2 NAD[c] <=> UDP-glucuronate[c] + 2 NADH[c] + 2 H[c]	(SACE_0095) or (SACE_5565) or (SACE_5566)	SACE_0095,SACE_5565,SACE_5566		Pentose and glucuronate interconversions	1	-1000	1000	0	2	1.1.1.22
r88	UTP:1-phospho-alpha-D-glucuronate uridylyltransferase	Diphosphate[c] + UDP-glucuronate[c] => UTP[c] + glcur1p[c]				Pentose and glucuronate interconversions	0	0	1000	0	2	2.7.7.44	reaction added for aminosugar metabolism
r89	ATP:D-glucuronate 1-phosphotransferase	ATP[c] + D-Glucuronate[c] => ADP[c] + glcur1p[c]				Pentose and glucuronate interconversions	0	0	1000	0	2	2.7.1.43	reaction added for aminosugar metabolism
r90	xylose isomerase	L-Lyxose[c] <=> L-Xylulose[c]	(SACE_4105)	SACE_4105		Pentose and glucuronate interconversions	1	-1000	1000	0	2	5.3.1.-
r91	putative rhamnose kinase	ATP[c] + L-Xylulose[c] <=> ADP[c] + xu1p_L[c]	(SACE_4103)	SACE_4103		Pentose and glucuronate interconversions	1	-1000	1000	0	2	2.7.1.5
r92	xylulose kinase	ADP[c] + xu5p_D[c] <=> ATP[c] + D-Xylulose[c]	(SACE_0929) or (SACE_0949) or (SACE_6529)	SACE_0929,SACE_0949,SACE_6529		Pentose and glucuronate interconversions	1	-1000	1000	0	2	2.7.1.17
r93	aldehyde dehydrogenase (NAD+)	2,5-Dioxopentanoate[c] + NADP[c] + H2O[c] => 2-Oxoglutarate[c] + NADPH[c] + H[c]	(SACE_1341) or (SACE_3880) or (SACE_6014) or (SACE_6249) or (SACE_6565) or (SACE_6566)	SACE_1341,SACE_3880,SACE_6014,SACE_6249,SACE_6565,SACE_6566		Pentose and glucuronate interconversions	0	0	1000	0	2	1.2.1.26
r94	D-xylose aldose-ketose-isomerase	D-Xylose[c] => D-Xylulose[c]				Pentose and glucuronate interconversions	0	0	1000	0	2	5.3.1.5	reaction added for D-xylose utilization
r95	L-Arabinose aldose-ketose-isomerase	L-Arabinose[c] => L-Ribulose[c]				Pentose and glucuronate interconversions	0	0	1000	0	2	5.3.1.4	reaction added for L-arabinose utilization
r96	ATP:L-ribulose 5-phosphotransferase	ATP[c] + L-Ribulose[c] => ADP[c] + ru5p_L[c]				Pentose and glucuronate interconversions	0	0	1000	0	2	2.7.1.16	reaction added for L-arabinose utilization
r97	L-ribulose-5-phosphate 4-epimerase	ru5p_L[c] => xu5p_D[c]				Pentose and glucuronate interconversions	0	0	1000	0	2	5.1.3.4	reaction added for L-arabinose utilization
r98	SACE_0388pyruvate, water dikinase	ATP[c] + Pyruvate[c] + H2O[c] => AMP[c] + Phosphoenolpyruvate[c] + Orthophosphate[c]	(SACE_0388) or (SACE_2459) or (SACE_2483) or (SACE_7324)	SACE_0388,SACE_2459,SACE_2483,SACE_7324		Pyruvate metabolism	0	0	1000	0	2	2.7.9.2
r99	L-lactate dehydrogenase (cytochrome)	(S)-Lactate[c] + 2 ficytC[c] <=> Pyruvate[c] + 2 focytC[c] + 2 H[c]	(SACE_2390) or (SACE_4311) or (SACE_5887)	SACE_2390,SACE_4311,SACE_5887		Pyruvate metabolism	1	-1000	1000	0	2	1.1.2.3
r100	SACE_6523lactate 2-monooxygenase	(S)-Lactate[c] + O2[c] => Acetate[c] + CO2[c] + H2O[c]	(SACE_6523)	SACE_6523		Pyruvate metabolism	0	0	1000	0	2	1.13.12.4
r101	pyruvate dehydrogenase	Pyruvate[c] + Q[c] + H2O[c] => Acetate[c] + CO2[c] + QH2[c]	(SACE_1218) or (SACE_5551)	SACE_1218,SACE_5551		Pyruvate metabolism	0	0	1000	0	2	1.2.5.1
r102	acylphosphatase	actp[c] + H2O[c] => Acetate[c] + Orthophosphate[c]	(SACE_6072)	SACE_6072		Pyruvate metabolism	0	0	1000	0	2	3.6.1.7
r103	acetate/propionate kinase	ATP[c] + Acetate[c] <=> ADP[c] + actp[c]	(SACE_1922)	SACE_1922		Pyruvate metabolism	1	-1000	1000	0	2	2.7.2.1
r104	SACE_0563malate dehydrogenase (oxaloacetate-decarboxylating)	(S)-Malate[c] + NAD[c] => Pyruvate[c] + CO2[c] + NADH[c] + H[c]	(SACE_0563) or (SACE_6415)	SACE_0563,SACE_6415		Pyruvate metabolism	0	0	1000	0	2	1.1.1.38
r105	acetyl-CoA synthetase	ATP[c] + Acetate[c] +CoA[c] => AMP[c] + Diphosphate[c] + Acetyl-CoA[c]	(SACE_0337) or (SACE_2375) or (SACE_2408) or (SACE_2851) or (SACE_3902) or (SACE_4730)	SACE_0337,SACE_2375,SACE_2408,SACE_2851,SACE_3902,SACE_4730		Pyruvate metabolism	0	0	1000	0	2	6.2.1.1
r106	quinoprotein ethanol dehydrogenase precursor	Ethanol[c] + PQQ[c] <=> PQQH2[c] + Acetaldehyde[c]	(SACE_4449)	SACE_4449		Pyruvate metabolism	1	-1000	1000	0	2	1.1.2.8
r107	SACE_1535putative zinc-type alcohol dehydrogenase transmembrane protein	Acetaldehyde[c] + NADH[c] + H[c] <=> Ethanol[c] + NAD[c]	(SACE_1535) or (SACE_2374) or (SACE_2733) or (SACE_2738) or (SACE_2944) or (SACE_2945) or (SACE_3519) or (SACE_4085) or (SACE_4163) or (SACE_4519) or (SACE_4852)	SACE_1535,SACE_2374,SACE_2733,SACE_2738,SACE_2944,SACE_2945,SACE_3519,SACE_4085,SACE_4163,SACE_4519,SACE_4852		Pyruvate metabolism	1	-1000	1000	0	2	1.1.1.1
r108	SACE_0343aldehyde dehydrogenase (NAD)	Acetaldehyde[c] + NAD[c] + H2O[c] => Acetate[c] + NADH[c] + H[c]	(SACE_1341) or (SACE_3880) or (SACE_6014) or (SACE_6249) or (SACE_6565) or (SACE_6566)	SACE_1341,SACE_3880,SACE_6014,SACE_6249,SACE_6565,SACE_6566		Pyruvate metabolism	0	0	1000	0	2	1.2.1.3
r109	SACE_0343aldehyde dehydrogenase (NAD)	Acetaldehyde[c] + NADP[c] + H2O[c] <=> Acetate[c] + NADPH[c] + H[c]	(SACE_1341) or (SACE_3880) or (SACE_6014) or (SACE_6249) or (SACE_6565) or (SACE_6566)	SACE_1341,SACE_3880,SACE_6014,SACE_6249,SACE_6565,SACE_6566		Pyruvate metabolism	0	0	0	0	2	1.2.1.3
r110	malate synthase	Acetyl-CoA[c] + H2O[c] + Glyoxylate[c] => (S)-Malate[c] + CoA[c]	(SACE_6756)	SACE_6756		Pyruvate metabolism	0	0	1000	0	2	2.3.3.9
r111	acetyl-CoA acetyltransferase	2 Acetyl-CoA[c] <=> CoA[c] + Acetoacetyl-CoA[c]	(SACE_0897) or (SACE_1192) or (SACE_2736) or (SACE_4011) or (SACE_6236) or (SACE_6363) or (SACE_7304)	SACE_0897,SACE_1192,SACE_2736,SACE_4011,SACE_6236,SACE_6363,SACE_7304		Pyruvate metabolism	1	-1000	1000	0	2	2.3.1.9
r112	2-isopropylmalate synthase	Acetyl-CoA[c] + 3moa[c] + H2O[c] => (2S)-2-Isopropylmalate[c] + CoA[c]	(SACE_0274) or (SACE_5707) or (SACE_6151)	SACE_0274,SACE_5707,SACE_6151		Pyruvate metabolism	0	0	1000	0	2	2.3.3.13
r113	acetyl carboxylase	ATP[c] + Acetyl-CoA[c] + HCO3[c] => ADP[c] + Orthophosphate[c] + Malonyl-CoA[c]	(SACE_0026 and SACE_0027 and SACE_0028 and SACE_3400 and SACE_3856 and SACE_6509 and SACE_7038)	SACE_0026,SACE_0027,SACE_0028,SACE_3400,SACE_3856,SACE_6509,SACE_7038		Pyruvate metabolism	0	0	1000	0	2	6.4.1.2
r114	SACE_3148hydroxyacylglutathione hydrolase	(R)-S-Lactoylglutathione[c] + H2O[c] => Glutathione[c] + (R)-Lactate[c]	(SACE_3148) or (SACE_4442) or (SACE_4489)	SACE_3148,SACE_4442,SACE_4489		Pyruvate metabolism	0	0	1000	0	2	3.1.2.6
r115	SACE_3640FAD linked oxidase-like	(R)-Lactate[c] + 2 ficytC[c] <=> Pyruvate[c] + 2 focytC[c] + 2 H[c]	(SACE_3640) or (SACE_3788)	SACE_3640,SACE_3788		Pyruvate metabolism	1	-1000	1000	0	2	1.1.2.4
r116	putative 2-hydroxyhepta-2,4-diene-1,7-dioate isomerase	2-Hydroxyethylenedicarboxylate[c] => Pyruvate[c] + CO2[c]	(SACE_1233) or (SACE_3828) or (SACE_3938) or (SACE_6202)	SACE_1233,SACE_3828,SACE_3938,SACE_6202		Pyruvate metabolism	0	0	1000	0	2	4.1.1.- 5.3.3.-
r117	pyruvate dehydrogenase	ficytb1[c] + Pyruvate[c] + H2O[c] <=> focytb1[c] + Acetate[c] + CO2[c]	(SACE_1218) or (SACE_5551)	SACE_1218,SACE_5551		Pyruvate metabolism	1	-1000	1000	0	2	1.2.2.2
r118	pyruvate dehydrogenase	Pyruvate[c] + CoA[c] + NAD[c] => Acetyl-CoA[c] + CO2[c] + NADH[c] + H[c]				Pyruvate metabolism	0	0	1000	0	2	1.2.4.1 1.8.1.4 2.3.1.12
r119	(S)-lactaldehyde:NAD oxidoreductase	(S)-Lactaldehyde[c] + NAD[c] + H2O[c] <=> (S)-Lactate[c] + NADH[c] + H[c]				Pyruvate metabolism	1	-1000	1000	0	2	1.2.1.22	reaction added for Rhamnose utilization
r120	alanine---glyoxylate transaminase	L-alanine + glyoxylate <=> pyruvate + glycine	(SACE_3639)	SACE_3639		Alanine, aspartate and glutamate metabolism	1	-1000	1000	0	2	2.6.1.44
r121	aspartate ammonia-lyase	L-Aspartate[c] => Fumarate[c] + NH3[c]	(SACE_2829) or (SACE_5071)	SACE_2829,SACE_5071		Alanine, aspartate and glutamate metabolism	0	0	1000	0	2	4.3.1.1
r122	adenylosuccinate synthetase	GTP[c] + IMP[c] + L-Aspartate[c] => GDP[c] + Orthophosphate[c] + dcamp[c]	(SACE_7173)	SACE_7173		Alanine, aspartate and glutamate metabolism	0	0	1000	0	2	6.3.4.4
r123	argininosuccinate synthase	ATP[c] + L-Citrulline[c] + L-Aspartate[c] => AMP[c] + Diphosphate[c] + argsuc[c]	(SACE_2917)	SACE_2917		Alanine, aspartate and glutamate metabolism	0	0	1000	0	2	6.3.4.5
r124	argininosuccinate lyase	argsuc[c] => Fumarate[c] + L-Arginine[c]	(SACE_5256) or (SACE_6330)	SACE_5256,SACE_6330		Alanine, aspartate and glutamate metabolism	0	0	1000	0	2	4.3.2.1
r125	asparagine synthase (glutamine-hydrolyzing)	ATP[c] + L-Aspartate[c] + L-Glutamine[c] + H2O[c] <=> AMP[c] + Diphosphate[c] + L-Asparagine[c] + L-Glutamate[c]	(SACE_1677) or (SACE_6091)	SACE_1677,SACE_6091		Alanine, aspartate and glutamate metabolism	1	-1000	1000	0	2	6.3.5.4
r126	L-asparaginase II precursor	L-Asparagine[c] + H2O[c] => L-Aspartate[c] + NH3[c]	(SACE_3615)	SACE_3615		Alanine, aspartate and glutamate metabolism	0	0	1000	0	2	3.5.1.1
r127	putative aspartate/glutamate racemase	L-Aspartate[c] => D-Aspartate[c]	(SACE_2953)	SACE_2953		Alanine, aspartate and glutamate metabolism	0	0	1000	0	2	5.1.1.13
r128	L-aspartate oxidase	L-Aspartate[c] + H2O[c] + O2[c] => Oxaloacetate[c] + NH3[c] + H2O2[c]	(SACE_5802)	SACE_5802		Alanine, aspartate and glutamate metabolism	0	0	1000	0	2	1.4.3.16
r129	L-Aspartate:2-oxoglutarate aminotransferase	L-Aspartate[c] + 2-Oxoglutarate[c] <=> Oxaloacetate[c] + L-Glutamate[c]				Alanine, aspartate and glutamate metabolism	1	-1000	1000	0	2	2.6.1.1	reaction added for gap filling
r130	aspartate carbamoyltransferase catalytic chain	cbp[c] + L-Aspartate[c] => Orthophosphate[c] + cbasp[c]	(SACE_2079)	SACE_2079		Alanine, aspartate and glutamate metabolism	0	0	1000	0	2	2.1.3.2
r131	L-glutamate 1-carboxy-lyase （4-aminobutanoate-forming)	L-Glutamate[c] => 4-Aminobutanoate[c] + CO2[c]				Alanine, aspartate and glutamate metabolism	0	0	1000	0	2	4.1.1.15	reaction added for glutamate degradation
r132	SACE_3418aminotransferase class III	4-Aminobutanoate[c] + 2-Oxoglutarate[c] => sucsal[c] + L-Glutamate[c]	(SACE_3418) or (SACE_3766) or (SACE_6022)	SACE_3418,SACE_3766,SACE_6022		Alanine, aspartate and glutamate metabolism	0	0	1000	0	2	2.6.1.19
r133	succinate-semialdehyde dehydrogenase (NAD(P)+)	sucsal[c] + NAD[c] + H2O[c] => Succinate[c] + NADH[c] + H[c]	(SACE_3767)	SACE_3767		Alanine, aspartate and glutamate metabolism	0	0	1000	0	2	1.2.1.16
r134	succinate-semialdehyde dehydrogenase (NAD(P)+)	sucsal[c] + NADP[c] + H2O[c] => Succinate[c] + NADPH[c] + H[c]	(SACE_3767)	SACE_3767		Alanine, aspartate and glutamate metabolism	0	0	1000	0	2	1.2.1.16 1.2.1.79
r135	NAD-specific glutamate dehydrogenase	L-Glutamate[c] + NAD[c] + H2O[c] => 2-Oxoglutarate[c] + NH3[c] + NADH[c] + H[c]	(SACE_1325) or (SACE_3873) or (SACE_3882) or (SACE_4093)	SACE_1325,SACE_3873,SACE_3882,SACE_4093		Alanine, aspartate and glutamate metabolism	0	0	1000	0	2	1.4.1.2 1.4.1.3
r136	NADP-specific glutamate dehydrogenase	L-Glutamate[c] + NADP[c] + H2O[c] <=> 2-Oxoglutarate[c] + NH3[c] + NADPH[c] + H[c]	(SACE_3873) or (SACE_3882) or (SACE_5979)	SACE_3873,SACE_3882,SACE_5979		Alanine, aspartate and glutamate metabolism	0	0	0	0	2	1.4.1.3 1.4.1.4
r137	SACE_3997glutamate synthase, NADH/NADPH, small subunit 1	L-Glutamine[c] + 2-Oxoglutarate[c] + NADH[c] + H[c] => 2 L-Glutamate[c] + NAD[c]	(SACE_3997 and SACE_3998 and SACE_5741 and SACE_5742)	SACE_3997,SACE_3998,SACE_5741,SACE_5742		Alanine, aspartate and glutamate metabolism	0	0	1000	0	2	1.4.1.13 1.4.1.14
r138	SACE_3997glutamate synthase, NADH/NADPH, small subunit 1	L-Glutamine[c] + 2-Oxoglutarate[c] + NADPH[c] + H[c] => 2 L-Glutamate[c] + NADP[c]	(SACE_3997 and SACE_3998 and SACE_5741 and SACE_5742)	SACE_3997,SACE_3998,SACE_5741,SACE_5742		Alanine, aspartate and glutamate metabolism	0	0	1000	0	2	1.4.1.13 1.4.1.14
r139	glutamine synthetase	ATP[c] + L-Glutamate[c] + NH3[c] => ADP[c] + Orthophosphate[c] + L-Glutamine[c]	(SACE_1613) or (SACE_1623) or (SACE_3095) or (SACE_5355)	SACE_1613,SACE_1623,SACE_3095,SACE_5355		Alanine, aspartate and glutamate metabolism	0	0	1000	0	2	6.3.1.2
r140	D-glucosamine-6-phosphate aminohydrolase ((ketol isomerizing); D-glucosamine-6-phosphate ketol-isomerase(deaminating)	gam6p[c] + H2O[c] <=> beta-f6p[c] + NH3[c]				Alanine, aspartate and glutamate metabolism	1	-1000	1000	0	2	3.5.99.6	reaction added for chitin utilization
r141	glucosamine-fructose-6-phosphate aminotransferase	L-Glutamine[c] + beta-f6p[c] => L-Glutamate[c] + gam6p[c]	(SACE_0498) or (SACE_6768)	SACE_0498,SACE_6768		Alanine, aspartate and glutamate metabolism	0	0	1000	0	2	2.6.1.16
r142	glutaminase	L-Glutamine[c] + H2O[c] => L-Glutamate[c] + NH3[c]	(SACE_1670)	SACE_1670		Alanine, aspartate and glutamate metabolism	0	0	1000	0	2	3.5.1.2
r143	amidophosphoribosyltransferase	L-Glutamine[c] + prpp[c] + H2O[c] => 5-Phosphoribosylamine[c] + Diphosphate[c] + L-Glutamate[c]	(SACE_7125)	SACE_7125		Alanine, aspartate and glutamate metabolism	0	0	1000	0	2	2.4.2.14
r144	SACE_1979delta-1-pyrroline-5-carboxylate dehydrogenase precursor	1yp5c_S[c] + NAD[c] + 2 H2O[c] => L-Glutamate[c] + NADH[c] + H[c]	(SACE_1979)	SACE_1979		Alanine, aspartate and glutamate metabolism	0	0	1000	0	2	1.2.1.88
r145	SACE_1979delta-1-pyrroline-5-carboxylate dehydrogenase precursor	1yp5c_S[c] + NADP[c] + 2 H2O[c] => L-Glutamate[c] + NADPH[c] + H[c]	(SACE_1979)	SACE_1979		Alanine, aspartate and glutamate metabolism	0	0	1000	0	2	1.2.1.88
r146	carbamoyl-phosphate synthase small subunit	2 ATP[c] + L-Glutamine[c] + HCO3[c] + H2O[c] => 2 ADP[c] + Orthophosphate[c] + L-Glutamate[c] + cbp[c]	(SACE_2082 and SACE_2083)	SACE_2082,SACE_2083		Alanine, aspartate and glutamate metabolism	0	0	1000	0	2	6.3.5.5
r147	SACE_3158carnitine O-acetyltransferase	Acetyl-CoA[c] + Carnitine[c] => CoA[c] + O-Acetylcarnitine[c]	(SACE_3158)	SACE_3158		Alanine, aspartate and glutamate metabolism	0	0	1000	0	2	2.3.1.7
r148	isocitrate lyase	Isocitrate[c] => Succinate[c] + Glyoxylate[c]	(SACE_1449)	SACE_1449		Glyoxylate and dicarboxylate metabolism	0	0	1000	0	2	4.1.3.1
r149	SACE_1932formamidase	Formamide[c] + H2O[c] => Formate[c] + NH3[c]	(SACE_1932)	SACE_1932		Glyoxylate and dicarboxylate metabolism	0	0	1000	0	2	3.5.1.49
r150	formyltetrahydrofolate deformylase	10fthf[c] + H2O[c] => Formate[c] + Tetrahydrofolate[c]	(SACE_4502) or (SACE_6982)	SACE_4502,SACE_6982		Glyoxylate and dicarboxylate metabolism	0	0	1000	0	2	3.5.1.10
r151	SACE_1383oxidoreductase alpha (molybdopterin) subunit	Formate[c] + NAD[c] <=> H[c] + CO2[c] + NADH[c]	(SACE_1383 and SACE_2432 and SACE_3561 and SACE_3562 and SACE_3563 and SACE_4509)	SACE_1383,SACE_2432,SACE_3561,SACE_3562,SACE_3563,SACE_4509		Glyoxylate and dicarboxylate metabolism	1	-1000	1000	0	2	1.2.1.2
r152	glycolaldehyde:NAD oxidoreductase	Glycolaldehyde[c] + NAD[c] + H2O[c] <=> Glycolate[c] + NADH[c] + H[c]				Glyoxylate and dicarboxylate metabolism	1	-1000	1000	0	2	1.2.1.21	reaction added
r153	phosphatase-like protein	2-Phosphoglycolate[c] + H2O[c] => Glycolate[c] + Orthophosphate[c]	(SACE_2872) or (SACE_4385)	SACE_2872,SACE_4385		Glyoxylate and dicarboxylate metabolism	0	0	1000	0	2	3.1.3.18
r154	putative glycolate oxidase	Glycolate[c] + O2[c] => Glyoxylate[c] + H2O2[c]	(SACE_3870) or (SACE_3889) or (SACE_4261 and SACE_6364 and SACE_6365 and SACE_6366)	SACE_3870,SACE_3889,SACE_4261,SACE_6364,SACE_6365,SACE_6366		Glyoxylate and dicarboxylate metabolism	0	0	1000	0	2	1.1.3.15
r155	hydrogen-peroxide:hydrogen-peroxide oxidoreductase	2 H2O2[c] => O2[c] + 2 H2O[c]	(SACE_0302) or (SACE_3861)	SACE_0302,SACE_3861		Glyoxylate and dicarboxylate metabolism	0	0	1000	0	2	1.11.1.6	reaction added to consume H2O2
r156	Methylmalonyl-CoA epimerase	(R)-Methylmalonyl-CoA[c] <=> (S)-Methylmalonyl-CoA[c]	(SACE_6238)	SACE_6238		Glyoxylate and dicarboxylate metabolism	1	-1000	1000	0	2	5.1.99.1	reaction added for valine degradation
r157	propanal:NAD+ oxidoreductase (CoA-propanoylating)	Propanal[c] + NAD[c] => Propanoate[c] + NADH[c] + H[c]				Glyoxylate and dicarboxylate metabolism	0	0	1000	0	2	1.2.1.87
r158	propionyl-CoA carboxylase, beta subunit	ATP[c] + Propanoyl-CoA[c] + HCO3[c] => ADP[c] + Orthophosphate[c] + (S)-Methylmalonyl-CoA[c]	(SACE_3241 and SACE_3242 and SACE_3398 and SACE_7039)	SACE_3241,SACE_3242,SACE_3398,SACE_7039		Glyoxylate and dicarboxylate metabolism	0	0	1000	0	2	6.4.1.3
r159	serine hydroxymethyltransferase	mlthf[c] + Glycine[c] + H2O[c] <=> Tetrahydrofolate[c] + L-Serine[c]	(SACE_4495) or (SACE_5702)	SACE_4495,SACE_5702		Glyoxylate and dicarboxylate metabolism	1	-1000	1000	0	2	2.1.2.1
r160	SACE_3639serine--glyoxylate aminotransferase	L-Serine[c] + Glyoxylate[c] => Hydroxypyruvate[c] + Glycine[c]	(SACE_3639)	SACE_3639		Glyoxylate and dicarboxylate metabolism	0	0	1000	0	2	2.6.1.45
r161	SACE_6731xylose isomerase domain-containing protein	Hydroxypyruvate[c] => 2-Hydroxy-3-oxopropanoate[c]	(SACE_6731)	SACE_6731		Glyoxylate and dicarboxylate metabolism	0	0	1000	0	2	5.3.1.22
r162	glyoxylate carboligase	2 Glyoxylate[c] => 2-Hydroxy-3-oxopropanoate[c] + CO2[c]	(SACE_1935) or (SACE_6729)	SACE_1935,SACE_6729		Glyoxylate and dicarboxylate metabolism	0	0	1000	0	2	4.1.1.47
r163	SACE_19362-hydroxy-3-oxopropionate reductase	2-Hydroxy-3-oxopropanoate[c] + NADH[c] + H[c] <=> D-Glycerate[c] + NAD[c]	(SACE_1936) or (SACE_5376) or (SACE_6730)	SACE_1936,SACE_5376,SACE_6730		Glyoxylate and dicarboxylate metabolism	0	0	1000	0	2	1.1.1.60
r164	SACE_19362-hydroxy-3-oxopropionate reductase	2-Hydroxy-3-oxopropanoate[c] + NADPH[c] + H[c] => D-Glycerate[c] + NADP[c]	(SACE_1936) or (SACE_5376) or (SACE_6730)	SACE_1936,SACE_5376,SACE_6730		Glyoxylate and dicarboxylate metabolism	0	0	0	0	2	1.1.1.60
r165	glycerate kinase	ATP + D-Glycerate => ADP + 2-Phospho-D-glycerate	(SACE_0098) or (SACE_6728)	SACE_0098,SACE_6728		Glycine, serine and threonine metabolism	0	0	1000	0	2	2.7.1.165
r166	2-dehydro-3-deoxyphosphogluconate aldolase / (4S)-4-hydroxy-2-oxoglutarate aldolase	(4S)-4-Hydroxy-2-oxoglutarate <=> Pyruvate + Glyoxylate	(SACE_1739) or (SACE_4936) or (SACE_5973)	SACE_1739,SACE_4936,SACE_5973		Glycine, serine and threonine metabolism	1	-1000	1000	0	2	4.1.3.42
r167	D-3-phosphoglycerate dehydrogenase	3-Phospho-D-glycerate[c] + NAD[c] <=> 3-Phosphonooxypyruvate[c] + NADH[c] + H[c]	(SACE_4226) or (SACE_4558) or (SACE_4605) or (SACE_5219) or (SACE_6155)	SACE_4226,SACE_4558,SACE_4605,SACE_5219,SACE_6155		Glycine, serine and threonine metabolism	1	-1000	1000	0	2	1.1.1.95
r168	phosphoserine aminotransferase	3-Phosphonooxypyruvate[c] + L-Glutamate[c] <=> O-Phospho-L-serine[c] + 2-Oxoglutarate[c]	(SACE_0630)	SACE_0630		Glycine, serine and threonine metabolism	1	-1000	1000	0	2	2.6.1.52
r169	phosphoserine phosphatase	O-Phospho-L-serine[c] + H2O[c] => L-Serine[c] + Orthophosphate[c]	(SACE_1188) or (SACE_6952)	SACE_1188,SACE_6952		Glycine, serine and threonine metabolism	0	0	1000	0	2	3.1.3.3
r170	L-serine dehydratase	L-Serine[c] => Pyruvate[c] + NH3[c]	(SACE_4501) or (SACE_6377) or (SACE_0904) or (SACE_3404) or (SACE_4356)	SACE_4501,SACE_6377,SACE_0904,SACE_3404,SACE_4356		Glycine, serine and threonine metabolism	0	0	1000	0	2	4.3.1.17 4.3.1.19
r171	tryptophan synthase subunit beta	L-Serine[c] + Indole[c] <=> L-Tryptophan[c] + H2O[c]	(SACE_5748 and SACE_5749)	SACE_5748,SACE_5749		Glycine, serine and threonine metabolism	0	0	1000	0	2	4.2.1.20
r172	tryptophan synthase alpha chain	L-Serine[c] + Indoleglycp[c] => L-Tryptophan[c] + g3p_D[c] + H2O[c]	(SACE_5748 and SACE_5749)	SACE_5748,SACE_5749		Glycine, serine and threonine metabolism	0	0	1000	0	2	4.2.1.20
r173	alanine-glyoxylate transaminase	L-Serine[c] + Pyruvate[c] => Hydroxypyruvate[c] + L-Alanine[c]	(SACE_3639)	SACE_3639		Glycine, serine and threonine metabolism	0	0	1000	0	2	2.6.1.51
r174	CDP-diacylglycerol--serine O-phosphatidyltransferase	CDP-diacylglycerol[c] + L-Serine[c] <=> CMP[c] + Phosphatidylserine[c]	(SACE_0520)	SACE_0520		Glycine, serine and threonine metabolism	1	-1000	1000	0	2	2.7.8.8
r175	cystathionine beta-synthase	L-Serine[c] + L-Homocysteine[c] => L-Cystathionine[c] + H2O[c]	(SACE_0899)	SACE_0899		Glycine, serine and threonine metabolism	0	0	1000	0	2	4.2.1.22
r176	SACE_6136cystathionine gamma-lyase	L-Cystathionine[c] + H2O[c] => L-Cysteine[c] + NH3[c] + 2-Oxobutanoate[c]	(SACE_6136)	SACE_6136		Glycine, serine and threonine metabolism	0	0	1000	0	2	4.4.1.1
r177	cystathionine beta-synthase	L-Serine[c] + h2s[c] => L-Cysteine[c] + H2O[c]	(SACE_0899)	SACE_0899		Glycine, serine and threonine metabolism	0	0	1000	0	2	4.2.1.22
r178	D-amino acid oxidase	Glycine[c] + H2O[c] + O2[c] => Glyoxylate[c] + NH3[c] + H2O2[c]	(SACE_0979)	SACE_0979		Glycine, serine and threonine metabolism	0	0	1000	0	2	1.4.3.3
r179	glycine dehydrogenase	Glycine[c] + Lipoylprotein[c] => S-Aminomethyldihydrolipoylprotein[c] + CO2[c]	(SACE_3842)	SACE_3842		Glycine, serine and threonine metabolism	0	0	1000	0	2	1.4.4.2
r180	SACE_5617aminomethyltransferase	S-Aminomethyldihydrolipoylprotein[c] + Tetrahydrofolate[c] => Dihydrolipoylprotein[c] + mlthf[c] + NH3[c]	(SACE_5617) or (SACE_5701)	SACE_5617,SACE_5701		Glycine, serine and threonine metabolism	0	0	1000	0	2	2.1.2.10
r181	dihydrolipoamide dehydrogenase	Dihydrolipoylprotein[c] + NAD[c] => Lipoylprotein[c] + NADH[c] + H[c]	(SACE_1639) or (SACE_5677) or (SACE_6526)	SACE_1639,SACE_5677,SACE_6526		Glycine, serine and threonine metabolism	0	0	1000	0	2	1.8.1.4
r182	threonine aldolase	Glycine[c] + Acetaldehyde[c] <=> L-Threonine[c]	(SACE_7162)	SACE_7162		Glycine, serine and threonine metabolism	1	-1000	1000	0	2	4.1.2.48
r183	L-threonine 3-dehydrogenase	L-Threonine[c] + NAD[c] => 2aobut[c] + NADH[c] + H[c]	(SACE_6389)	SACE_6389		Glycine, serine and threonine metabolism	0	0	1000	0	2	1.1.1.103
r184	8-amino-7-oxononanoate synthase	CoA[c] + 2aobut[c] => Acetyl-CoA[c] + Glycine[c]	(SACE_4477) or (SACE_6390)	SACE_4477,SACE_6390		Glycine, serine and threonine metabolism	0	0	1000	0	2	2.3.1.29
r185	low-specificity L-threonine aldolase	Glycine[c] + Acetaldehyde[c] <=> L-Allothreonine[c]	(SACE_7162)	SACE_7162		Glycine, serine and threonine metabolism	1	-1000	1000	0	2	4.1.2.48
r186	putative flavin-containing monoamine oxidase	Aminoacetone[c] + H2O[c] + O2[c] <=> Methylglyoxal[c] + NH3[c] + H2O2[c]	(SACE_4116) or (SACE_4854)	SACE_4116,SACE_4854		Glycine, serine and threonine metabolism	1	-1000	1000	0	2	1.4.3.4
r187	threonine dehydratase	L-Threonine[c] <=> 2-Oxobutanoate[c] + NH3[c]	(SACE_0904) or (SACE_3404) or (SACE_4356)	SACE_0904,SACE_3404,SACE_4356		Glycine, serine and threonine metabolism	1	-1000	1000	0	2	4.3.1.19
r188	aspartate kinase	ATP[c] + L-Aspartate[c] <=> ADP[c] + 4-Phospho-L-aspartate[c]	(SACE_0282)	SACE_0282		Glycine, serine and threonine metabolism	1	-1000	1000	0	2	2.7.2.4
r189	SACE_0283aspartate-semialdehyde dehydrogenase, USG-1 related	4-Phospho-L-aspartate[c] + NADPH[c] + H[c] => aspsa[c] + Orthophosphate[c] + NADP[c]	(SACE_0283)	SACE_0283		Glycine, serine and threonine metabolism	0	0	1000	0	2	1.2.1.11
r190	SACE_2236homoserine dehydrogenase	aspsa[c] + NADH[c] + H[c] <=> L-Homoserine[c] + NAD[c]	(SACE_2236) or (SACE_6298)	SACE_2236,SACE_6298		Glycine, serine and threonine metabolism	1	-1000	1000	0	2	1.1.1.3
r191	SACE_2236homoserine dehydrogenase	aspsa[c] + NADPH[c] + H[c] <=> L-Homoserine[c] + NADP[c]	(SACE_2236) or (SACE_6298)	SACE_2236,SACE_6298		Glycine, serine and threonine metabolism	0	0	0	0	2	1.1.1.3
r192	Acetyl-CoA:L-homoserine O-acetyltransferase	Acetyl-CoA[c] + L-Homoserine[c] => CoA[c] + O-Acetyl-L-homoserine[c]				Glycine, serine and threonine metabolism	0	0	1000	0	2	2.3.1.31	reaction added for Met metabolism
r193	homoserine kinase	ATP[c] + L-Homoserine[c] => ADP[c] + O-Phospho-L-homoserine[c]	(SACE_6296)	SACE_6296		Glycine, serine and threonine metabolism	0	0	1000	0	2	2.7.1.39
r194	SACE_1007threonine synthase-like protein	O-Phospho-L-homoserine[c] + H2O[c] => L-Threonine[c] + Orthophosphate[c]	(SACE_1007) or (SACE_1437) or (SACE_6297)	SACE_1007,SACE_1437,SACE_6297		Glycine, serine and threonine metabolism	0	0	1000	0	2	4.2.3.1
r195	diaminobutyrate--2-oxoglutarate aminotransferase	L-Glutamate[c] + aspsa[c] => 2-Oxoglutarate[c] + L-2,4-Diaminobutanoate[c]	(SACE_0484)	SACE_0484		Glycine, serine and threonine metabolism	0	0	1000	0	2	2.6.1.76
r196	putative L-2,4-diaminobutyric acid acetyltransferase	L-2,4-Diaminobutanoate[c] + Acetyl-CoA[c] => N-gamma-Acetyldiaminobutyrate[c] + CoA[c]	(SACE_0483)	SACE_0483		Glycine, serine and threonine metabolism	0	0	1000	0	2	2.3.1.178
r197	L-ectoine synthase	N-gamma-Acetyldiaminobutyrate[c] <=> H2O[c] + Ectoine[c]	(SACE_0485)	SACE_0485		Glycine, serine and threonine metabolism	1	-1000	1000	0	2	4.2.1.108
r198	ectoine hydroxylase	Ectoine[c] + 2-Oxoglutarate[c] + O2[c] => 5-Hydroxyectoine[c] + Succinate[c] + CO2[c]	(SACE_0486)	SACE_0486		Glycine, serine and threonine metabolism	0	0	1000	0	2	1.14.11.-
r199	SACE_4336amidinotransferase family protein	L-Arginine[c] + Glycine[c] => L-Ornithine[c] + Guanidinoacetate[c]	(SACE_4336)	SACE_4336		Glycine, serine and threonine metabolism	0	0	1000	0	2	2.1.4.1
r200	glycine sarcosine N-methyltransferase	2 amet + Glycine => 2 ahcys + dmgly	(SACE_3901) or (SACE_5862)	SACE_3901,SACE_5862		Glycine, serine and threonine metabolism	0	0	1000	0	2	2.1.1.156
r201	sarcosine oxidase	Sarcosine[c] + H2O[c] + O2[c] => Glycine[c] + Formaldehyde[c] + H2O2[c]	(SACE_2963 and SACE_3881 and SACE_4491 and SACE_4492 and SACE_4493 and SACE_4494 and SACE_5611 and SACE_5612 and SACE_5613 and SACE_5614)	SACE_2963,SACE_3881,SACE_4491,SACE_4492,SACE_4493,SACE_4494,SACE_5611,SACE_5612,SACE_5613,SACE_5614		Glycine, serine and threonine metabolism	0	0	1000	0	2	1.5.3.1
r202	glycine sarcosine N-methyltransferase	2 amet + Sarcosine => 2 ahcys + Betain	(SACE_3901)	SACE_3901		Glycine, serine and threonine metabolism	0	0	1000	0	2	2.1.1.157
r203	SACE_2592glucose-methanol-choline oxidoreductase	Choline[c] + Acceptor[c] <=> betald[c] + acceptor(reduced)[c]	(SACE_2592) or (SACE_2760) or (SACE_4202) or (SACE_4210) or (SACE_5444)	SACE_2592,SACE_2760,SACE_4202,SACE_4210,SACE_5444		Glycine, serine and threonine metabolism	1	-1000	1000	0	2	1.1.99.1
r204	SACE_2895betaine-aldehyde dehydrogenase	betald[c] + NAD[c] + H2O[c] <=> Betaine[c] + NADH[c] + 2 H[c]	(SACE_2895) or (SACE_3776) or (SACE_3969) or (SACE_4203) or (SACE_4926) or (SACE_5371) or (SACE_5668) or (SACE_6016)	SACE_2895,SACE_3776,SACE_3969,SACE_4203,SACE_4926,SACE_5371,SACE_5668,SACE_6016		Glycine, serine and threonine metabolism	1	-1000	1000	0	2	1.2.1.8
r205	SACE_2895betaine-aldehyde dehydrogenase	betald[c] + NADP[c] + H2O[c] <=> Betaine[c] + NADPH[c] + 2 H[c]	(SACE_2895) or (SACE_3776) or (SACE_3969) or (SACE_4203) or (SACE_4926) or (SACE_5371) or (SACE_5668) or (SACE_6016)	SACE_2895,SACE_3776,SACE_3969,SACE_4203,SACE_4926,SACE_5371,SACE_5668,SACE_6016		Glycine, serine and threonine metabolism	0	0	0	0	2	1.2.1.8
r206	SACE_2747short chain dehydrogenase/reductase family oxidoreductase	Methylglyoxal[c] + NADPH[c] + H[c] <=> Hydroxyacetone[c] + NADP[c]	(SACE_2747) or (SACE_3080) or (SACE_4387) or (SACE_4696) or (SACE_5586) or (SACE_7048)	SACE_2747,SACE_3080,SACE_4387,SACE_4696,SACE_5586,SACE_7048		Glycine, serine and threonine metabolism	1	-1000	1000	0	2	1.1.1.-
r207	SACE_6136cystathionine gamma-lyase	L-Cystine[c] + H2O[c] <=> Pyruvate[c] + NH3[c] + Thiocysteine[c]	(SACE_6136)	SACE_6136		Cysteine and Methionine metabolism	1	-1000	1000	0	2	4.4.1.1
r208	serine O-acetyltransferase	L-Serine[c] + Acetyl-CoA[c] <=> O-Acetyl-L-serine[c] + CoA[c]	(SACE_2889)	SACE_2889		Cysteine and Methionine metabolism	1	-1000	1000	0	2	2.3.1.30
r209	cysteine synthase	O-Acetyl-L-serine[c] + h2s[c] => L-Cysteine[c] + Acetate[c]	(SACE_1206) or (SACE_1726) or (SACE_2893) or (SACE_3013) or (SACE_4282) or (SACE_6328) or (SACE_6924)	SACE_1206,SACE_1726,SACE_2893,SACE_3013,SACE_4282,SACE_6328,SACE_6924		Cysteine and Methionine metabolism	0	0	1000	0	2	2.5.1.47
r210	cysteine synthase	O-Acetyl-L-serine[c] + Thiosulfate[c] + Thioredoxin[c] + H[c] => L-Cysteine[c] + Sulfite[c] + trdds[c] + Acetate[c]	(SACE_1206) or (SACE_1726) or (SACE_2893) or (SACE_3013) or (SACE_4282) or (SACE_6328) or (SACE_6924)	SACE_1206,SACE_1726,SACE_2893,SACE_3013,SACE_4282,SACE_6328,SACE_6924		Cysteine and Methionine metabolism	0	0	1000	0	2	2.5.1.47
r211	L-cystathionine L-homocysteine-lyase （deaminating; pyruvate-forming)	L-Cystathionine[c] + H2O[c] => L-Homocysteine[c] + NH3[c] + Pyruvate[c]	(SACE_3049)	SACE_3049		Cysteine and Methionine metabolism	0	0	1000	0	2	4.4.1.8	reaction added (in KEGG but not in list)
r212	homocysteine methyltransferase	amet[c] + L-Homocysteine[c] => ahcys[c] + L-Methionine[c]	(SACE_3890)	SACE_3890		Cysteine and Methionine metabolism	0	0	1000	0	2	2.1.1.10
r213	putative 5mthf:homocysteine S-methyltransferase	5mthf[c] + L-Homocysteine[c] <=> Tetrahydrofolate[c] + L-Methionine[c]	(SACE_3898)	SACE_3898		Cysteine and Methionine metabolism	1	-1000	1000	0	2	2.1.1.13
r214	5-methyltetrahydropteroyltriglutamate--homocysteine methyltransferase	5mthglu[c] + L-Homocysteine[c] => thglu[c] + L-Methionine[c]	(SACE_4744) or (SACE_6349) or (SACE_7052)	SACE_4744,SACE_6349,SACE_7052		Cysteine and Methionine metabolism	0	0	1000	0	2	2.1.1.14
r215	methionine gamma-lyase	L-Methionine[c] + H2O[c] <=> Methanethiol[c] + NH3[c] + 2-Oxobutanoate[c]	(SACE_3377)	SACE_3377		Cysteine and Methionine metabolism	1	-1000	1000	0	2	4.4.1.11
r216	methionine adenosyltransferase 1(AdoMet synthetase)	ATP[c] + L-Methionine[c] + H2O[c] => Orthophosphate[c] + Diphosphate[c] + amet[c]	(SACE_2103) or (SACE_3900)	SACE_2103,SACE_3900		Cysteine and Methionine metabolism	0	0	1000	0	2	2.5.1.6
r217	SACE_1123C-5 cytosine-specific DNA methylase	amet[c] + dnac[c] => ahcys[c] + dna5mtc[c]	(SACE_1123) or (SACE_1557)	SACE_1123,SACE_1557		Cysteine and Methionine metabolism	0	0	1000	0	2	2.1.1.37
r218	ahcys hydrolase	ahcys[c] + H2O[c] => Adenosine[c] + L-Homocysteine[c]	(SACE_3897) or (SACE_6450)	SACE_3897,SACE_6450		Cysteine and Methionine metabolism	0	0	1000	0	2	3.3.1.1
r219	SACE_1267S-adenosylmethionine decarboxylase proenzyme	amet[c] <=> S-Adenosylmethioninamine[c] + CO2[c]	(SACE_1267) or (SACE_4335)	SACE_1267, SACE_4335		Cysteine and Methionine metabolism	1	-1000	1000	0	2	4.1.1.50
r220	spermidine synthase	S-Adenosylmethioninamine[c] + Putrescine[c] <=> 5'-Methylthioadenosine[c] + Spermidine[c]	(SACE_0456)	SACE_0456		Cysteine and Methionine metabolism	1	-1000	1000	0	2	2.5.1.16
r221	spermidine synthase	S-Adenosylmethioninamine[c] + Spermidine[c] => 5'-Methylthioadenosine[c] + Spermine[c]	(SACE_0456)	SACE_0456		Cysteine and Methionine metabolism	0	0	1000	0	2	2.5.1.16
r222	spermidine synthase	S-Adenosylmethioninamine[c] + Cadaverine[c] <=> 5'-Methylthioadenosine[c] + Aminopropylcadaverine[c]	(SACE_0456)	SACE_0456		Cysteine and Methionine metabolism	1	-1000	1000	0	2	2.5.1.16
r223	SACE_6136cystathionine gamma-lyase	h2s[c] + Pyruvate[c] + NH3[c] <=> L-Cysteine[c] + H2O[c]	(SACE_3049) or (SACE_6136)	SACE_3049,SACE_6136		Cysteine and Methionine metabolism	1	-1000	1000	0	2	4.4.1.1 4.4.1.8
r224	cystathionine gamma-synthase	O-Acetyl-L-serine[c] + Thiosulfate[c] => S-Sulfo-L-cysteine[c] + Acetate[c]	(SACE_1206)	SACE_1206		Cysteine and Methionine metabolism	0	0	1000	0	2	2.5.1.48 2.5.1.47
r225	L-serine dehydratase	L-Serine[c] => 2-Aminoacrylate[c] + H2O[c]	(SACE_4501) or (SACE_6377)	SACE_4501,SACE_6377		Cysteine and Methionine metabolism	0	0	1000	0	2	4.3.1.17
r226	3-mercaptopyruvate sulfurtransferase	Mercaptopyruvate[c] + Sulfite[c] => Thiosulfate[c] + Pyruvate[c]	(SACE_1777)	SACE_1777		Cysteine and Methionine metabolism	0	0	1000	0	2	2.8.1.2
r227	cystathionine gamma-synthase	suchms[c] + L-Cysteine[c] => L-Cystathionine[c] + Succinate[c]	(SACE_0902)	SACE_0902		Cysteine and Methionine metabolism	0	0	1000	0	2	2.5.1.48
r228	cystathionine gamma-synthase	suchms[c] + H2O[c] => 2-Oxobutanoate[c] + Succinate[c] + NH3[c]	(SACE_0902)	SACE_0902		Cysteine and Methionine metabolism	0	0	1000	0	2	2.5.1.48
r229	cystathionine gamma-synthase	O-Acetyl-L-homoserine[c] + L-Cysteine[c] => L-Cystathionine[c] + Acetate[c]	(SACE_0902)	SACE_0902		Cysteine and Methionine metabolism	0	0	1000	0	2	2.5.1.48
r230	cystathionine gamma-synthase	suchms[c] + h2s[c] => L-Homocysteine[c] + Succinate[c]	(SACE_0902)	SACE_0902		Cysteine and Methionine metabolism	0	0	1000	0	2	2.5.1.48
r231	cystathionine gamma-synthase	O-Acetyl-L-homoserine[c] + Thiosulfate[c] + Thioredoxin[c] + H[c] => L-Homocysteine[c] + Sulfite[c] + trdds[c] + Acetate[c]	(SACE_0902)	SACE_0902		Cysteine and Methionine metabolism	0	0	1000	0	2	2.5.1.48
r232	SACE_19681acpc deaminase	1acpc[c] + H2O[c] => 2-Oxobutanoate[c] + NH3[c]	(SACE_1968) or (SACE_2778)	SACE_1968,SACE_2778		Cysteine and Methionine metabolism	0	0	1000	0	2	3.5.99.7
r233	methylthioribose-1-phosphate isomerase	5mdr1p[c] <=> 5mdru1p[c]	(SACE_3608)	SACE_3608		Cysteine and Methionine metabolism	1	-1000	1000	0	2	5.3.1.23
r234	SACE_1646branched-chain amino acid aminotransferase	L-Leucine[c] + 2-Oxoglutarate[c] <=> 4mop[c] + L-Glutamate[c]	(SACE_1646) or (SACE_2128)	SACE_1646,SACE_2128		Valine, leucine and isoleucine degradation	1	-1000	1000	0	2	2.6.1.42
r235	SACE_3884pyruvate dehydrogenase （acetyl-transferring) beta subunit	4mop[c] + thmpp[c] <=> 3-Methyl-1-hydroxybutyl-ThPP[c] + CO2[c]	(SACE_3884)	SACE_3884		Valine, leucine and isoleucine degradation	1	-1000	1000	0	2	1.2.4.4
r236	SACE_3884pyruvate dehydrogenase （acetyl-transferring) beta subunit	3-Methyl-1-hydroxybutyl-ThPP[c] + N6-(lipoyl)lysine(Enzyme)[c] <=> S-(3-Methylbutanoyl)-dihydrolipoamide-E[c] + thmpp[c]	(SACE_3884)	SACE_3884		Valine, leucine and isoleucine degradation	1	-1000	1000	0	2	1.2.4.4
r237	3-methylbutanoyl-CoA:enzyme N6-(dihydrolipoyl)lysine S-(3-methylbutanoyl)transferase	CoA[c] + S-(3-Methylbutanoyl)-dihydrolipoamide-E[c] => 3-Methylbutanoyl-CoA[c] + N6-(dihydrolipoyl)lysine(Enzyme)[c]				Valine, leucine and isoleucine degradation	0	0	1000	0	2	2.3.1.168	reaction added for leucine degradation pathway
r238	putative acyl-CoA dehydrogenase	3-Methylbutanoyl-CoA[c] + FAD[c] <=> 3-Methylcrotonyl-CoA[c] + FADH2[c]	(SACE_2743) or (SACE_2745) or (SACE_2758) or (SACE_2850) or (SACE_3126) or (SACE_3565) or (SACE_4125) or (SACE_5017) or (SACE_5025) or (SACE_5380) or (SACE_5699)	SACE_2743,SACE_2745,SACE_2758,SACE_2850,SACE_3126,SACE_3565,SACE_4125,SACE_5017,SACE_5025,SACE_5380,SACE_5699		Valine, leucine and isoleucine degradation	1	-1000	1000	0	2	1.3.8.7
r239	putative enoyl-CoA hydratase/isomerase family protein	3-Methylcrotonyl-CoA[c] + H2O[c] <=> 3-Hydroxyisovaleryl-CoA[c]	(SACE_1028) or (SACE_1458) or (SACE_1464) or (SACE_2748) or (SACE_2794) or (SACE_3018) or (SACE_3084) or (SACE_3132) or (SACE_3450) or (SACE_3745) or (SACE_3868 ) or (SACE_3989) or (SACE_4015) or (SACE_4571) or (SACE_4787) or (SACE_5406) or (SACE_6207) or (SACE_6362)	SACE_1028,SACE_1458,SACE_1464,SACE_2748,SACE_2794,SACE_3018,SACE_3084,SACE_3132,SACE_3450,SACE_3745,SACE_3868 ,SACE_3989,SACE_4015,SACE_4571,SACE_4787,SACE_5406,SACE_6207,SACE_6362		Valine, leucine and isoleucine degradation	1	-1000	1000	0	2	4.2.1.17
r240	3-Methylcrotonoyl-CoA:carbon-dioxide ligase (ADP-forming)	ATP[c] + 3-Methylcrotonyl-CoA[c] + HCO3[c] => ADP[c] + Orthophosphate[c] + 3-Methylglutaconyl-CoA[c]	(SACE_7039)	SACE_7039		Valine, leucine and isoleucine degradation	0	0	1000	0	2	6.4.1.4	reaction added for leucine degradation pathway
r241	S)-3-Hydroxy-3-methylglutaryl-CoA hydro-lyase (trans-3-methylglutaconyl-CoA-forming)	3-Methylglutaconyl-CoA[c] + H2O[c] <=> (S)-3-Hydroxy-3-methylglutaryl-CoA[c]	(SACE_1464)	SACE_1464		Valine, leucine and isoleucine degradation	1	-1000	1000	0	2	4.2.1.18	reaction added for leucine degradation pathway
r242	SACE_3041hydroxymethylglutaryl-CoA lyase	(S)-3-Hydroxy-3-methylglutaryl-CoA[c] => Acetyl-CoA[c] + Acetoacetate[c]	(SACE_3041) or (SACE_4360) or (SACE_6499)	SACE_3041,SACE_4360,SACE_6499		Valine, leucine and isoleucine degradation	0	0	1000	0	2	4.1.3.4
r243	acetoacetyl-CoA synthetase	ATP[c] + Acetoacetate[c] + CoA[c] => AMP[c] + Diphosphate[c] + Acetoacetyl-CoA[c]	(SACE_0219)	SACE_0219		Valine, leucine and isoleucine degradation	0	0	1000	0	2	6.2.1.16
r244	SACE_1646branched-chain amino acid aminotransferase	L-Valine[c] + 2-Oxoglutarate[c] <=> 3moa[c] + L-Glutamate[c]	(SACE_1646) or (SACE_2128)	SACE_1646,SACE_2128		Valine, leucine and isoleucine degradation	1	-1000	1000	0	2	2.6.1.42
r245	SACE_3884pyruvate dehydrogenase （acetyl-transferring) beta subunit	3moa[c] + thmpp[c] => 2-Methyl-1-hydroxypropyl-ThPP[c] + CO2[c]	(SACE_3884)	SACE_3884		Valine, leucine and isoleucine degradation	0	0	1000	0	2	1.2.4.4
r246	SACE_3884pyruvate dehydrogenase （acetyl-transferring) beta subunit	2-Methyl-1-hydroxypropyl-ThPP[c] + N6-(lipoyl)lysine(Enzyme)[c] => [Dihydrolipoyllysine-residue-(2-methylpropanoyl)transferase]-S-(2-methylpropanoyl)dihydrolipoyllysine[c] + thmpp[c]	(SACE_3884)	SACE_3884		Valine, leucine and isoleucine degradation	0	0	1000	0	2	1.2.4.4
r247	2-methylpropanoyl-CoA:enzyme N6-(dihydrolipoyl)lysine S-(2-methylpropanoyl)transferase	CoA[c] + S-(2-Methylpropanoyl)-dihydrolipoamide-E[c] => N6-(dihydrolipoyl)lysine(Enzyme)[c] + 2-Methylpropanoyl-CoA[c]				Valine, leucine and isoleucine degradation	0	0	1000	0	2	2.3.1.168
r248	3-methyl-2-oxobutanoate:ferredoxin oxidoreductase (decarboxylating;CoA-2-methylpropanoylating)	3moa[c] + CoA[c] + 2 fdxox[c] <=> 2-Methylpropanoyl-CoA[c] + CO2[c] + 2 fdxrd[c] + H[c]				Valine, leucine and isoleucine degradation	1	-1000	1000	0	2	1.2.7.7	reaction added for valine degradation
r249	putative acyl-CoA dehydrogenase	2-Methylpropanoyl-CoA[c] + Acceptor[c] <=> 2-Methylprop-2-enoyl-CoA[c] + acceptor(reduced)[c]	(SACE_2743) or (SACE_2745) or (SACE_2758) or (SACE_2850) or (SACE_3126) or (SACE_3565) or (SACE_4125) or (SACE_5017) or (SACE_5025) or (SACE_5380) or (SACE_5699)	SACE_2743,SACE_2745,SACE_2758,SACE_2850,SACE_3126,SACE_3565,SACE_4125,SACE_5017,SACE_5025,SACE_5380,SACE_5699		Valine, leucine and isoleucine degradation	1	-1000	1000	0	2	1.3.99.3
r250	putative enoyl-CoA hydratase/isomerase family protein	2-Methylprop-2-enoyl-CoA[c] + H2O[c] => (S)-3-Hydroxyisobutyryl-CoA[c]	(SACE_1028) or (SACE_1458) or (SACE_1464) or (SACE_2748) or (SACE_2794) or (SACE_3018) or (SACE_3084) or (SACE_3132) or (SACE_3450) or (SACE_3745) or (SACE_3868 ) or (SACE_3989) or (SACE_4015) or (SACE_4571) or (SACE_4787) or (SACE_5406) or (SACE_6207) or (SACE_6362)	SACE_1028,SACE_1458,SACE_1464,SACE_2748,SACE_2794,SACE_3018,SACE_3084,SACE_3132,SACE_3450,SACE_3745,SACE_3868 ,SACE_3989,SACE_4015,SACE_4571,SACE_4787,SACE_5406,SACE_6207,SACE_6362		Valine, leucine and isoleucine degradation	0	0	1000	0	2	4.2.1.17
r251	（S)-3-Hydroxyisobutyryl-CoA hydrolase	(S)-3-Hydroxyisobutyryl-CoA[c] + H2O[c] <=> CoA[c] + (S)-3-Hydroxyisobutyrate[c]				Valine, leucine and isoleucine degradation	1	-1000	1000	0	2	3.1.2.4	reaction added for valine degradation
r252	SACE_0092short-chain dehydrogenase/reductase SDR	(S)-3-Hydroxyisobutyrate[c] + NAD[c] <=> mmsa[c] + NADH[c] + H[c]	(SACE_1371) or (SACE_1459) or (SACE_3558) or (SACE_6362)	SACE_1371,SACE_1459,SACE_3558,SACE_6362		Valine, leucine and isoleucine degradation	1	-1000	1000	0	2	1.1.1.31 1.1.1.35
r253	methylmalonate-semialdehyde dehydrogenase (acylating)	mmsa[c] + CoA[c] + NAD[c] => Propanoyl-CoA[c] + CO2[c] + NADH[c] + H[c]	(SACE_1456) or (SACE_4672) or (SACE_5185)	SACE_1456,SACE_4672,SACE_5185		Valine, leucine and isoleucine degradation	0	0	1000	0	2	1.2.1.27
r254	L-3-amino-isobutanoate:2-oxoglutarate aminotransferase	mmsa[c] + L-Glutamate[c] <=> L-3-Amino-isobutanoate[c] + 2-Oxoglutarate[c]	(SACE_6022)	SACE_6022		Valine, leucine and isoleucine degradation	1	-1000	1000	0	2	2.6.1.22	reaction added for valine degradation - in KEGG but not in list
r255	SACE_0343aldehyde dehydrogenase （NAD)	mmsa[c] + NAD[c] + H2O[c] => Methylmalonate[c] + NADH[c] + H[c]	(SACE_0343) or (SACE_1341) or (SACE_2377) or (SACE_2783) or (SACE_2915) or (SACE_3880) or (SACE_6014) or (SACE_6249) or (SACE_6565) or (SACE_6566)	SACE_0343,SACE_1341,SACE_2377,SACE_2783,SACE_2915,SACE_3880,SACE_6014,SACE_6249,SACE_6565,SACE_6566		Valine, leucine and isoleucine degradation	0	0	1000	0	2	1.2.1.3
r256	unclear reaction	Methylmalonate[c] + CoA[c] => (R)-Methylmalonyl-CoA[c] + H2O[c]				Valine, leucine and isoleucine degradation	0	0	1000	0	2	unclear reaction	reaction added for Methylmalonyl interconversion
r257	methylmalonyl-CoA mutase, beta subunit	Succinyl-CoA[c] <=> (R)-Methylmalonyl-CoA[c]	(SACE_5638 and SACE_5639)	SACE_5638,SACE_5639		Valine, leucine and isoleucine degradation	1	-1000	1000	0	2	5.4.99.2
r258	SACE_1646branched-chain amino acid aminotransferase	L-Isoleucine[c] + 2-Oxoglutarate[c] <=> 3mop[c] + L-Glutamate[c]	(SACE_1646) or (SACE_2128)	SACE_1646,SACE_2128		Valine, leucine and isoleucine degradation	1	-1000	1000	0	2	2.6.1.42
r259	SACE_3884pyruvate dehydrogenase （acetyl-transferring) beta subunit	3mop[c] + thmpp[c] <=> 2-Methyl-1-hydroxybutyl-ThPP[c] + CO2[c]	(SACE_3884)	SACE_3884		Valine, leucine and isoleucine degradation	1	-1000	1000	0	2	1.2.4.4
r260	SACE_3884pyruvate dehydrogenase （acetyl-transferring) beta subunit	2-Methyl-1-hydroxybutyl-ThPP[c] + N6-(lipoyl)lysine(Enzyme)[c] <=> [Dihydrolipoyllysine-residue-(2-methylpropanoyl)transferase]-S-(2-methylbutanoyl)dihydrolipoyllysine[c] + thmpp[c]	(SACE_3884)	SACE_3884		Valine, leucine and isoleucine degradation	1	-1000	1000	0	2	1.2.4.4
r261	S)-2-methylbutanoyl-CoA:enzyme N6-(dihydrolipoyl)lysine S-(2-methylbutanoyl)transferase	CoA[c] + S-(2-Methylbutanoyl)-dihydrolipoamide-E[c] => (S)-2-Methylbutanoyl-CoA[c] + N6-(dihydrolipoyl)lysine(Enzyme)[c]				Valine, leucine and isoleucine degradation	0	0	1000	0	2	2.3.1.168	reaction added for isoleucine degradation pathway
r262	putative acyl-CoA dehydrogenase	(S)-2-Methylbutanoyl-CoA[c] + Acceptor[c] <=> 2-Methylbut-2-enoyl-CoA[c] + acceptor(reduced)[c]	(SACE_2743) or (SACE_2745) or (SACE_2758) or (SACE_2850) or (SACE_3126) or (SACE_3565) or (SACE_4125) or (SACE_5017) or (SACE_5025) or (SACE_5380) or (SACE_5699)	SACE_2743,SACE_2745,SACE_2758,SACE_2850,SACE_3126,SACE_3565,SACE_4125,SACE_5017,SACE_5025,SACE_5380,SACE_5699		Valine, leucine and isoleucine degradation	1	-1000	1000	0	2	1.3.99.3
r263	putative enoyl-CoA hydratase/isomerase family protein	2-Methylbut-2-enoyl-CoA[c] + H2O[c] => (2S,3S)-3-Hydroxy-2-methylbutanoyl-CoA[c]	(SACE_1028) or (SACE_1458) or (SACE_1464) or (SACE_2748) or (SACE_2794) or (SACE_3018) or (SACE_3084) or (SACE_3132) or (SACE_3450) or (SACE_3745) or (SACE_3868 ) or (SACE_3989) or (SACE_4015) or (SACE_4571) or (SACE_4787) or (SACE_5406) or (SACE_6207) or (SACE_6362)	SACE_1028,SACE_1458,SACE_1464,SACE_2748,SACE_2794,SACE_3018,SACE_3084,SACE_3132,SACE_3450,SACE_3745,SACE_3868 ,SACE_3989,SACE_4015,SACE_4571,SACE_4787,SACE_5406,SACE_6207,SACE_6362		Valine, leucine and isoleucine degradation	0	0	1000	0	2	4.2.1.17
r264	SACE_0092short-chain dehydrogenase/reductase SDR	(2S,3S)-3-Hydroxy-2-methylbutanoyl-CoA[c] + NAD[c] <=> 2-Methylacetoacetyl-CoA[c] + NADH[c] + H[c]	(SACE_0092) or (SACE_1823) or (SACE_2849) or (SACE_3445) or (SACE_3866) or (SACE_6362)	SACE_0092,SACE_1823,SACE_2849,SACE_3445,SACE_3866,SACE_6362		Valine, leucine and isoleucine degradation	1	-1000	1000	0	2	1.1.1.35
r265	SACE_1824acetyl-coa acetyltransferase (thiolase)	CoA[c] + 2-Methylacetoacetyl-CoA[c] => Propanoyl-CoA[c] + Acetyl-CoA[c]	(SACE_1824) or (SACE_3994)	SACE_1824,SACE_3994		Valine, leucine and isoleucine degradation	0	0	1000	0	2	2.3.1.16
r266	3-isopropylmalate dehydratase small subunit	(R)-2-Methylmalate[c] => 2-Methylmaleate[c] + H2O[c]	(SACE_6143 and SACE_6144)	SACE_6143,SACE_6144		Valine, leucine and isoleucine biosynthesis	0	0	1000	0	2	4.2.1.35
r267	3-isopropylmalate dehydratase small subunit	2-Methylmaleate[c] + H2O[c] => r3mmal[c]	(SACE_6143 and SACE_6144)	SACE_6143,SACE_6144		Valine, leucine and isoleucine biosynthesis	0	0	1000	0	2	4.2.1.33
r268	3-isopropylmalate dehydrogenase	r3mmal[c] + NAD[c] => 2-Oxobutanoate[c] + CO2[c] + NADH[c] + H[c]	(SACE_3196) or (SACE_3495) or (SACE_4608) or (SACE_6154)	SACE_3196,SACE_3495,SACE_4608,SACE_6154		Valine, leucine and isoleucine biosynthesis	0	0	1000	0	2	1.1.1.85
r269	acetolactate synthase large subunit	Pyruvate[c] + 2-Oxobutanoate[c] <=> (S)-2-Aceto-2-hydroxybutanoate[c] + CO2[c]	(SACE_0604 and SACE_3465 and SACE_3908 and SACE_4565 and SACE_5632 and SACE_6158 and SACE_6159)	SACE_0604,SACE_3465,SACE_3908,SACE_4565,SACE_5632,SACE_6158,SACE_6159		Valine, leucine and isoleucine biosynthesis	0	0	1000	0	2	2.2.1.6
r270	ketol-acid reductoisomerase	(S)-2-Aceto-2-hydroxybutanoate[c] <=> (R)-3-Hydroxy-3-methyl-2-oxopentanoate[c]	(SACE_6157)	SACE_6157		Valine, leucine and isoleucine biosynthesis	1	-1000	1000	0	2	1.1.1.86
r271	ketol-acid reductoisomerase	(R)-3-Hydroxy-3-methyl-2-oxopentanoate[c] + NADPH[c] + H[c] <=> (R)-2,3-Dihydroxy-3-methylpentanoate[c] + NADP[c]	(SACE_6157)	SACE_6157		Valine, leucine and isoleucine biosynthesis	1	-1000	1000	0	2	1.1.1.86
r272	dihydroxy-acid dehydratase	(R)-2,3-Dihydroxy-3-methylpentanoate[c] => 3mop[c] + H2O[c]	(SACE_1280) or (SACE_5858) or (SACE_6161)	SACE_1280,SACE_5858,SACE_6161		Valine, leucine and isoleucine biosynthesis	1	-1000	1000	0	2	4.2.1.9
r273	acetolactate synthase large subunit	2 Pyruvate[c] => alac_S[c] + CO2[c]	(SACE_0604 and SACE_3465 and SACE_3908 and SACE_4565 and SACE_5632 and SACE_6158 and SACE_6159)	SACE_0604,SACE_3465,SACE_3908,SACE_4565 SACE_5632,SACE_6158,SACE_6159		Valine, leucine and isoleucine biosynthesis	0	0	1000	0	2	2.2.1.6
r274	ketol-acid reductoisomerase	alac_S[c] <=> 3-Hydroxy-3moa[c]	(SACE_6157)	SACE_6157		Valine, leucine and isoleucine biosynthesis	1	-1000	1000	0	2	1.1.1.86
r275	ketol-acid reductoisomerase	3-Hydroxy-3moa[c] + NADPH[c] + H[c] <=> (R)-2,3-Dihydroxy-3-methylbutanoate[c] + NADP[c]	(SACE_6157)	SACE_6157		Valine, leucine and isoleucine biosynthesis	1	-1000	1000	0	2	1.1.1.86
r276	dihydroxy-acid dehydratase	(R)-2,3-Dihydroxy-3-methylbutanoate[c] <=> 3moa[c] + H2O[c]	(SACE_1280) or (SACE_5858) or (SACE_6161)	SACE_1280,SACE_5858,SACE_6161		Valine, leucine and isoleucine biosynthesis	1	-1000	1000	0	2	4.2.1.9
r277	valine--pyruvate transaminase	L-Valine[c] + Pyruvate[c] <=> 3moa[c] + L-Alanine[c]	(SACE_4564)	SACE_4564		Valine, leucine and isoleucine biosynthesis	1	-1000	1000	0	2	2.6.1.66
r278	3-isopropylmalate dehydratase small subunit	(2S)-2-Isopropylmalate[c] <=> 2-Isopropylmaleate[c] + H2O[c]	(SACE_6143 and SACE_6144)	SACE_6143,SACE_6144		Valine, leucine and isoleucine biosynthesis	1	-1000	1000	0	2	4.2.1.33
r279	3-isopropylmalate dehydratase small subunit	2-Isopropylmaleate[c] + H2O[c] <=> (2R,3S)-3-Isopropylmalate[c]	(SACE_6143 and SACE_6144)	SACE_6143,SACE_6144		Valine, leucine and isoleucine biosynthesis	1	-1000	1000	0	2	4.2.1.33
r280	3-isopropylmalate dehydrogenase	(2R,3S)-3-Isopropylmalate[c] + NAD[c] <=> (2S)-2-Isopropyl-3-oxosuccinate[c] + NADH[c] + H[c]	(SACE_3196) or (SACE_3495) or (SACE_4608) or (SACE_6154)	SACE_3196,SACE_3495,SACE_4608,SACE_6154		Valine, leucine and isoleucine biosynthesis	1	-1000	1000	0	2	1.1.1.85
r281	spontaneous reaction	(2S)-2-Isopropyl-3-oxosuccinate[c] => 4mop[c] + CO2[c]				Valine, leucine and isoleucine biosynthesis	0	0	1000	0	2	spontaneous reaction	reaction added for valine metabolism (spontaneous)
r282	acetolactate synthase large subunit	2-Oxobutanoate[c] + 2ahethmpp[c] <=> (S)-2-Aceto-2-hydroxybutanoate[c] + thmpp[c]	(SACE_0604 and SACE_3465 and SACE_3908 and SACE_4565 and SACE_5632 and SACE_6158 and SACE_6159)	SACE_0604,SACE_3465,SACE_3908,SACE_4565 SACE_5632,SACE_6158,SACE_6159		Valine, leucine and isoleucine biosynthesis	1	-1000	1000	0	2	2.2.1.6
r283	4-hydroxy-tetrahydrodipicolinate synthase	aspsa[c] + Pyruvate[c] => (2S,4S)-4-Hydroxy-2,3,4,5-tetrahydrodipicolinate[c] + H2O[c]	(SACE_1253) or (SACE_1629) or (SACE_2548) or (SACE_3251) or (SACE_4604) or (SACE_5158) or (SACE_5899)	SACE_1253,SACE_1629,SACE_2548,SACE_3251,SACE_4604,SACE_5158,SACE_5899		Lysine biosynthesis	0	0	1000	0	2	4.3.3.7
r284	4-hydroxy-tetrahydrodipicolinate reductase	(2S,4S)-4-Hydroxy-2,3,4,5-tetrahydrodipicolinate[c] + NADH[c] + H[c] => thdp[c] + NAD[c] + H2O[c]	(SACE_5912)	SACE_5912		Lysine biosynthesis	0	0	1000	0	2	1.17.1.8
r285	2,3,4,5-tetrahydropyridine-2,6-dicarboxylate N-succinyltransferase	Succinyl-CoA[c] + thdp[c] + H2O[c] => CoA[c] + sl2a6o[c]	(SACE_1013)	SACE_1013		Lysine biosynthesis	0	0	1000	0	2	2.3.1.117
r286	N-succinyldiaminopimelate aminotransferase	sl2a6o[c] + L-Glutamate[c] <=> sl26da[c] + 2-Oxoglutarate[c]	(SACE_1011) or (SACE_6995)	SACE_1011,SACE_6995		Lysine biosynthesis	1	-1000	1000	0	2	2.6.1.11 2.6.1.17
r287	dipeptidase	sl26da[c] + H2O[c] => Succinate[c] + 26dap_LL[c]	(SACE_1018)	SACE_1018		Lysine biosynthesis	0	0	1000	0	2	3.5.1.18
r288	diaminopimelate epimerase	26dap_LL[c] <=> 26dap_M[c]	(SACE_1753)	SACE_1753		Lysine biosynthesis	1	-1000	1000	0	2	5.1.1.7
r289	SACE_2107diaminopimelate decarboxylase	26dap_M[c] => L-Lysine[c] + CO2[c]	(SACE_2107) or (SACE_6299)	SACE_2107,SACE_6299		Lysine biosynthesis	0	0	1000	0	2	4.1.1.20
r290	UDP-N-acetylmuramoylalanyl-D-glutamate--2,6-diaminopimelate ligase	ATP[c] + uamag[c] + 26dap_M[c] => ADP[c] + Orthophosphate[c] + ugmd[c]	(SACE_5856)	SACE_5856		Lysine biosynthesis	0	0	1000	0	2	6.3.2.13
r291	UDP-N-acetylmuramoyl-tripeptide--D-alanyl-D-alani ne ligase	ATP[c] + ugmd[c] + alaala[c] => ADP[c] + Orthophosphate[c] + UDP-N-acetylmuramoyl-L-alanyl-D-glutamyl-6-carboxy-L-lysyl-alaala[c]	(SACE_5855)	SACE_5855		Lysine biosynthesis	0	0	1000	0	2	6.3.2.10
r292	saccharopine dehydrogenase	L-Lysine[c] + 2-Oxoglutarate[c] + NADH[c] + H[c] <=> Saccharopine[c] + NAD[c] + H2O[c]	(SACE_1566)	SACE_1566		Lysine biosynthesis	1	-1000	1000	0	2	1.5.1.7
r293	L-lysine aminotransferase	L-Lysine[c] + 2-Oxoglutarate[c] => L2aadp6sa[c] + L-Glutamate[c]	(SACE_0784)	SACE_0784		Lysine biosynthesis	0	0	0	0	2	2.6.1.36
r294	dihydrodipicolinate synthase	aspsa[c] + Pyruvate[c] <=> L-2,3-Dihydrodipicolinate[c] + 2 H2O[c]	(SACE_1253) or (SACE_1629) or (SACE_2548) or (SACE_3251) or (SACE_4604) or (SACE_5158) or (SACE_5899)	SACE_1253,SACE_1629,SACE_2548,SACE_3251,SACE_4604,SACE_5158,SACE_5899		Lysine biosynthesis	1	-1000	1000	0	2	4.3.3.7
r295	dihydrodipicolinate reductase	thdp[c] + NAD[c] => L-2,3-Dihydrodipicolinate[c] + NADH[c] + H[c]	(SACE_5912)	SACE_5912		Lysine biosynthesis	0	0	1000	0	2	1.17.1.8
r296	dihydrodipicolinate reductase	thdp[c] + NADP[c] => L-2,3-Dihydrodipicolinate[c] + NADPH[c] + H[c]	(SACE_5912)	SACE_5912		Lysine biosynthesis	0	0	0	0	2	1.17.1.8
r297		Saccharopine[c] + NAD[c] + H2O[c] <=> L-Glutamate[c] + L2aadp6sa[c] + NADH[c] + H[c]				Lysine degradation	1	-1000	1000	0	2	1.5.1.9
r298		Saccharopine[c] + NADP[c] + H2O[c] <=> L-Glutamate[c] + L2aadp6sa[c] + NADPH[c] + H[c]				Lysine degradation	0	0	0	0	2	1.5.1.10
r299	L-2-Aminoadipate-6-semialdehyde:NAD 6-oxidoreductase	L2aadp6sa[c] + NAD[c] + H2O[c] <=> L-2-Aminoadipate[c] + NADH[c] + H[c]				Lysine degradation	1	-1000	1000	0	2	1.2.1.31	reaction added for lysine degradation
r300	L-2-aminoadipate:2-oxoglutarate aminotransferase	L-2-Aminoadipate[c] + 2-Oxoglutarate[c] => 2-Oxoadipate[c] + L-Glutamate[c]				Lysine degradation	0	0	1000	0	2	2.6.1.39	reaction added for lysine degradation
r301	2-Oxoadipate:lipoamde 2-oxidoreductase(decarboxylating and acceptor-succinylating)	2-Oxoadipate[c] + N6-(lipoyl)lysine(Enzyme)[c] <=> S-Glutaryldihydrolipoamide-E[c] + CO2[c]				Lysine degradation	1	-1000	1000	0	2	1.2.4.2	reaction added for lysine degradation
r302	dihydrolipoamide succinyltransferase	CoA[c] + S-Glutaryldihydrolipoamide-E[c] <=> Glutaryl-CoA[c] + N6-(dihydrolipoyl)lysine(Enzyme)[c]	(SACE_1638)	SACE_1638		Lysine degradation	1	-1000	1000	0	2	2.3.1.61
r303	glutaryl-CoA dehydrogenase	Glutaryl-CoA[c] + FAD[c] => FADH2[c] + Crotonoyl-CoA[c] + CO2[c]	(SACE_1911) or (SACE_5409)	SACE_1911,SACE_5409		Lysine degradation	0	0	1000	0	2	1.3.8.6
r304	glutaryl-CoA dehydrogenase	Glutaryl-CoA[c] + cytP450(Electron-transferring)[c] => Crotonoyl-CoA[c] + cytP450r(Electron-transferring)[c] + CO2[c]	(SACE_1911) or (SACE_5409)	SACE_1911,SACE_5409		Lysine degradation	0	0	1000	0	2	1.3.8.6
r305	putative enoyl-CoA hydratase/isomerase family protein	Crotonoyl-CoA[c] + H2O[c] => (S)-3-Hydroxybutanoyl-CoA[c]	(SACE_1028) or (SACE_1458) or (SACE_1464) or (SACE_2748) or (SACE_2794) or (SACE_3018) or (SACE_3084) or (SACE_3132) or (SACE_3450) or (SACE_3745) or (SACE_3868 ) or (SACE_3989) or (SACE_4015) or (SACE_4571) or (SACE_4787) or (SACE_5406) or (SACE_6207) or (SACE_6362)	SACE_1028,SACE_1458,SACE_1464,SACE_2748,SACE_2794,SACE_3018,SACE_3084,SACE_3132,SACE_3450,SACE_3745,SACE_3868 ,SACE_3989,SACE_4015,SACE_4571,SACE_4787,SACE_5406,SACE_6207,SACE_6362		Lysine degradation	0	0	1000	0	2	4.2.1.17
r306	SACE_0092short-chain dehydrogenase/reductase SDR	(S)-3-Hydroxybutanoyl-CoA[c] + NAD[c] <=> Acetoacetyl-CoA[c] + NADH[c] + H[c]	(SACE_0092) or (SACE_1823) or (SACE_2849) or (SACE_3445) or (SACE_3866) or (SACE_6362)	SACE_0092,SACE_1823,SACE_2849,SACE_3445,SACE_3866,SACE_6362		Lysine degradation	1	-1000	1000	0	2	1.1.1.35
r307	3-hydroxybutyryl-CoA dehydrogenase	(S)-3-Hydroxybutanoyl-CoA[c] + NADP[c] <=> Acetoacetyl-CoA[c] + NADPH[c] + H[c]	(SACE_1902) or (SACE_4006)	SACE_1902,SACE_4006		Lysine degradation	0	0	0	0	2	1.1.1.35 1.1.1.157
r308	SACE_0343aldehyde dehydrogenase （NAD)	4-Trimethylammoniobutanal[c] + NAD[c] + H2O[c] <=> 4-Trimethylammoniobutanoate[c] + NADH[c] + H[c]	(SACE_0343) or (SACE_1341) or (SACE_2377) or (SACE_2783) or (SACE_2915) or (SACE_3880) or (SACE_6014) or (SACE_6249) or (SACE_6565) or (SACE_6566)	SACE_0343,SACE_1341,SACE_2377,SACE_2783,SACE_2915,SACE_3880,SACE_6014,SACE_6249,SACE_6565,SACE_6566		Lysine degradation	1	-1000	1000	0	2	1.2.1.3
r309	SACE_1611exported protease	N6,N6,N6-trimethyl-L-lysine(protein)[c] + 2 H2O[c] => N6,N6,N6-Trimethyl-L-lysine[c] + 2 Protein[c]	(SACE_1611) or (SACE_5913) or (SACE_6352) or (SACE_6794)	SACE_1611,SACE_5913,SACE_6352,SACE_6794		Lysine degradation	0	0	1000	0	2	3.4.-.- 2.4.2.-
r310	bifunctional ornithine acetyltransferase/N-acetylglutamate synthase protein	Acetyl-CoA[c] + L-Glutamate[c] => CoA[c] + N-Acetyl-L-glutamate[c]	(SACE_5261)	SACE_5261		Arginine biosynthesis	0	0	1000	0	2	2.3.1.1 2.3.1.35
r311	acetylglutamate kinase	ATP[c] + N-Acetyl-L-glutamate[c] => ADP[c] + acglu5p[c]	(SACE_5260)	SACE_5260		Arginine biosynthesis	0	0	1000	0	2	2.7.2.8
r312	SACE_5263N-acetyl-gamma-glutamyl-phosphate reductase	acglu5p[c] + NADPH[c] + H[c] => acg5sa[c] + Orthophosphate[c] + NADP[c]	(SACE_5263)	SACE_5263		Arginine biosynthesis	0	0	1000	0	2	1.2.1.38
r313	N-succinyldiaminopimelate aminotransferase	acg5sa[c] + L-Glutamate[c] => N-Acetylornithine[c] + 2-Oxoglutarate[c]	(SACE_1011) or (SACE_4673) or (SACE_5259) or (SACE_5670) or (SACE_6995)	SACE_1011,SACE_4673,SACE_5259,SACE_5670,SACE_6995		Arginine biosynthesis	0	0	1000	0	2	2.6.1.11 2.6.1.17
r314	SACE_6534peptidase M20D, amidohydrolase	N-Acetylornithine[c] + H2O[c] => Acetate[c] + L-Ornithine[c]	(SACE_6534) or (SACE_6656)	SACE_6534,SACE_6656		Arginine biosynthesis	0	0	1000	0	2	3.5.1.14 3.5.1.16
r315	bifunctional ornithine acetyltransferase/N-acetylglutamate synthase protein	N-Acetylornithine[c] + L-Glutamate[c] <=> L-Ornithine[c] + N-Acetyl-L-glutamate[c]	(SACE_5261)	SACE_5261		Arginine biosynthesis	1	-1000	1000	0	2	2.3.1.1 2.3.1.35
r316	SACE_4292putative ornithine carbamoyltransferase	cbp[c] + L-Ornithine[c] => Orthophosphate[c] + L-Citrulline[c]	(SACE_4292) or (SACE_5258)	SACE_4292,SACE_5258		Arginine biosynthesis	0	0	1000	0	2	2.1.3.3
r317	arginine deiminase	L-Arginine[c] + H2O[c] <=> L-Citrulline[c] + NH3[c]	(SACE_0131)	SACE_0131		Arginine biosynthesis	1	-1000	1000	0	2	3.5.3.6
r318	nitric oxide synthase oxygenase	2 L-Arginine[c] + 3 NADH[c] + 3 H[c] + 4 O2[c] <=> 2 L-Citrulline[c] + 2 NO[c] + 3 NAD[c] + 4 H2O[c]	(SACE_5845) or (SACE_7255)	SACE_5845,SACE_7255		Arginine biosynthesis	1	-1000	1000	0	2	1.14.13.165
r319	nitric oxide synthase oxygenase	2 L-Arginine[c] + 4 O2[c] + 3 NADPH[c] + 3 H[c] <=> 2 NO[c] + 2 L-Citrulline[c] + 3 NADP[c] + 4 H2O[c]	(SACE_5845) or (SACE_7255)	SACE_5845,SACE_7255		Arginine biosynthesis	0	0	0	0	2	1.14.13.165 1.14.13.39
r320	arginase	L-Arginine[c] + H2O[c] => L-Ornithine[c] + Urea[c]	(SACE_4760)	SACE_4760		Arginine biosynthesis	0	0	1000	0	2	3.5.3.1
r321	urease gamma subunit protein	Urea[c] + H2O[c] => CO2[c] + 2 NH3[c]	(SACE_0634 and SACE_0635 and SACE_0636 and SACE_2526 and SACE_2527 and SACE_3484 and SACE_3485)	SACE_0634,SACE_0635,SACE_0636,SACE_2526,SACE_2527,SACE_3484,SACE_3485		Arginine biosynthesis	0	0	1000	0	2	3.5.1.5
r322	acetylornithine deacetylase	N-Acetyl-L-citrulline[c] + H2O[c] => Acetate[c] + L-Citrulline[c]	(SACE_6656)	SACE_6656		Arginine biosynthesis	0	0	1000	0	2	3.5.1.16
r323	nitric oxide synthase oxygenase	L-Arginine[c] + O2[c] + NADPH[c] + H[c] => N-(omega)-Hydroxyarginine[c] + NADP[c] + H2O[c]	(SACE_5845) or (SACE_7255)	SACE_5845,SACE_7255		Arginine and proline metabolism	0	0	1000	0	2	1.14.13.165
r324	nitric oxide synthase oxygenase	L-Arginine[c] + O2[c] + NADH[c] + H[c] => N-(omega)-Hydroxyarginine[c] + NAD[c] + H2O[c]	(SACE_5845) or (SACE_7255)	SACE_5845,SACE_7255		Arginine and proline metabolism	0	0	1000	0	2	1.14.13.165
r325	nitric oxide synthase oxygenase	NADPH + 2 N(omega)-Hydroxyarginine + 2 O2[c] + H => NADP + 2 NO[c] + 2 L-Citrulline + 2 H2O	(SACE_5845) or (SACE_7255)	SACE_5845,SACE_7255		Arginine and proline metabolism	0	0	1000	0	2	1.14.13.165
r326	nitric oxide synthase oxygenase	2 N(omega)-Hydroxyarginine + NADH + H + 2 O2[c] => 2 L-Citrulline + 2 NO[c] + NAD + 2 H2O	(SACE_5845) or (SACE_7255)	SACE_5845,SACE_7255		Arginine and proline metabolism	0	0	1000	0	2	1.14.13.165
r327	SACE_4336amidinotransferase family protein	L-Arginine[c] + 4-Aminobutanoate[c] <=> L-Ornithine[c] + 4-Guanidinobutanoate[c]	(SACE_4336)	SACE_4336		Arginine and proline metabolism	1	-1000	1000	0	2	2.1.4.1
r328	ornithine--oxo-acid transaminase	L-Ornithine[c] + 2-Oxoglutarate[c] => glu5aa[c] + L-Glutamate[c]	(SACE_1875)	SACE_1875		Arginine and proline metabolism	0	0	1000	0	2	2.6.1.13
r329	spontaneous reaction	glu5aa[c] => 1yp5c_S[c] + H2O[c]				Arginine and proline metabolism	0	0	1000	0	2	spontaneous reaction	reaction added for ornithine metabolism (spontaneous)
r330	gamma-glutamate kinase	ATP[c] + L-Glutamate[c] <=> ADP[c] + glu5p[c]	(SACE_1417)	SACE_1417		Arginine and proline metabolism	1	-1000	1000	0	2	2.7.2.11
r331	gamma-glutamyl phosphate reductase	glu5p[c] + NADPH[c] + H[c] => glu5aa[c] + Orthophosphate[c] + NADP[c]	(SACE_1424)	SACE_1424		Arginine and proline metabolism	0	0	1000	0	2	1.2.1.41
r332	SACE_1266Orn/DAP/Arg decarboxylase 2	L-Ornithine[c] => Putrescine[c] + CO2[c]	(SACE_1266) or (SACE_4334)	SACE_1266,SACE_4334		Arginine and proline metabolism	0	0	1000	0	2	4.1.1.17
r333	SACE_6015agmatinase, putative	Agmatine[c] + H2O[c] => Putrescine[c] + Urea[c]	(SACE_6015) or (SACE_6017)	SACE_6015,SACE_6017		Arginine and proline metabolism	0	0	1000	0	2	3.5.3.11
r334	proline iminopeptidase	2 Peptide[c] + H2O[c] <=> L-Proline[c] + Peptide[c]	(SACE_2704)	SACE_2704		Arginine and proline metabolism	1	-1000	1000	0	2	3.4.11.5
r335	SACE_3252proline racemase	L-Proline[c] <=> D-Proline[c]	(SACE_3252)	SACE_3252		Arginine and proline metabolism	1	-1000	1000	0	2	5.1.1.4
r336	D-amino acid oxidase	D-Proline[c] + O2[c] => 1-Pyrroline-2-carboxylate[c] + H2O2[c]	(SACE_0979)	SACE_0979		Arginine and proline metabolism	0	0	1000	0	2	1.4.3.3
r337	non enzymatic reaction	1-Pyrroline-2-carboxylate[c] + H2O[c] => 5a2ohp[c]				Arginine and proline metabolism	0	0	1000	0	2	non enzymatic reaction	reaction added for gap filling
r338	pyrroline-5-carboxylate reductase	L-Proline[c] + NAD[c] => 1yp5c_S[c] + NADH[c] + H[c]	(SACE_6959)	SACE_6959		Arginine and proline metabolism	0	0	1000	0	2	1.5.1.2
r339	pyrroline-5-carboxylate reductase	1yp5c_S[c] + NADPH[c] + H[c] => L-Proline[c] + NADP[c]	(SACE_6959)	SACE_6959		Arginine and proline metabolism	0	0	0	0	2	1.5.1.2
r340	SACE_1978proline dehydrogenase	L-Proline[c] + Quinone[c] => 1yp5c_S[c] + Hydroquinone[c]	(SACE_1978)	SACE_1978		Arginine and proline metabolism	0	0	1000	0	2	1.5.5.2
r341	putative ornithine cyclodeaminase	L-Ornithine[c] <=> L-Proline[c] + NH3[c]	(SACE_3017) or (SACE_3879) or (SACE_4281)	SACE_3017,SACE_3879,SACE_4281		Arginine and proline metabolism	1	-1000	1000	0	2	4.3.1.12
r342	putative flavin-containing monoamine oxidase	N-Acetylputrescine[c] + H2O[c] + O2[c] <=> N4-Acetylaminobutanal[c] + NH3[c] + H2O2[c]	(SACE_4116) or (SACE_4854)	SACE_4116,SACE_4854		Arginine and proline metabolism	1	-1000	1000	0	2	1.4.3.4
r343	SACE_0343aldehyde dehydrogenase (NAD)	N4-Acetylaminobutanal[c] + NAD[c] + H2O[c] <=> 4-Acetamidobutanoate[c] + NADH[c] + H[c]	(SACE_0343) or (SACE_1341) or (SACE_2377) or (SACE_2783) or (SACE_2915) or (SACE_3880) or (SACE_6014) or (SACE_6249) or (SACE_6565) or (SACE_6566)	SACE_0343,SACE_1341,SACE_2377,SACE_2783,SACE_2915,SACE_3880,SACE_6014,SACE_6249,SACE_6565,SACE_6566		Arginine and proline metabolism	1	-1000	1000	0	2	1.2.1.3
r344	SACE_0343aldehyde dehydrogenase (NAD)	4-Aminobutanal[c] + NAD[c] + H2O[c] <=> 4-Aminobutanoate[c] + NADH[c] + H[c]	(SACE_0343) or (SACE_1341) or (SACE_2377) or (SACE_2783) or (SACE_2915) or (SACE_3880) or (SACE_6014) or (SACE_6249) or (SACE_6565) or (SACE_6566)	SACE_0343,SACE_1341,SACE_2377,SACE_2783,SACE_2915,SACE_3880,SACE_6014,SACE_6249,SACE_6565,SACE_6566		Arginine and proline metabolism	1	-1000	1000	0	2	1.2.1.3
r345	SACE_4293amidase	4-Guanidinobutanamide[c] + H2O[c] <=> 4-Guanidinobutanoate[c] + NH3[c]	(SACE_1914) or (SACE_4293) or (SACE_4294) or (SACE_5032)	SACE_1914,SACE_4293,SACE_4294,SACE_5032		Arginine and proline metabolism	1	-1000	1000	0	2	3.5.1.4
r346	SACE_2391creatininase	Creatine[c] <=> Creatinine[c] + H2O[c]	(SACE_2391)	SACE_2391		Arginine and proline metabolism	1	-1000	1000	0	2	3.5.2.10
r347	L-Proline,2-oxoglutarate:oxygen oxidoreductase (4-hydroxylating)	L-Proline[c] + 2-Oxoglutarate[c] + O2[c] <=> trans-4-Hydroxy-L-proline[c] + Succinate[c] + CO2[c]				Arginine and proline metabolism	1	-1000	1000	0	2	1.14.11.2	reactopm added for proline degradation
r348	pyrroline-5-carboxylate reductase	L-1-Pyrroline-3-hydroxy-5-carboxylate[c] + NADH[c] + H[c] => trans-4-Hydroxy-L-proline[c] + NAD[c]	(SACE_6959)	SACE_6959		Arginine and proline metabolism	0	0	1000	0	2	1.5.1.2
r349	pyrroline-5-carboxylate reductase	L-1-Pyrroline-3-hydroxy-5-carboxylate[c] + NADPH[c] + H[c] => trans-4-Hydroxy-L-proline[c] + NADP[c]	(SACE_6959)	SACE_6959		Arginine and proline metabolism	0	0	1000	0	2	1.5.1.2
r350	SACE_1979delta-1-pyrroline-5-carboxylate dehydrogenase precursor	L-1-Pyrroline-3-hydroxy-5-carboxylate[c] + NAD[c] + 2 H2O[c] => L-erythro-4-Hydroxyglutamate[c] + NADH[c] + H[c]	(SACE_1979)	SACE_1979		Arginine and proline metabolism	0	0	1000	0	2	1.2.1.88
r351	SACE_1979delta-1-pyrroline-5-carboxylate dehydrogenase precursor	L-1-Pyrroline-3-hydroxy-5-carboxylate[c] + NADP[c] + 2 H2O[c] => L-erythro-4-Hydroxyglutamate[c] + NADPH[c] + H[c]	(SACE_1979)	SACE_1979		Arginine and proline metabolism	0	0	1000	0	2	1.2.1.88
r352	L-erythro-4-hydroxyglutamate:2-oxoglutarate aminotransferase	L-erythro-4-Hydroxyglutamate[c] + 2-Oxoglutarate[c] <=> D-4-Hydroxy-2-oxoglutarate[c] + L-Glutamate[c]				Arginine and proline metabolism	1	-1000	1000	0	2	2.6.1.1; 2.6.1.23	reactopm added for proline degradation
r353	KHG/KDPG aldolase	D-4-Hydroxy-2-oxoglutarate[c] => Pyruvate[c] + Glyoxylate[c]	(SACE_1739) or (SACE_4936) or (SACE_5973)	SACE_1739,SACE_4936,SACE_5973		Arginine and proline metabolism	0	0	1000	0	2	4.1.2.14 4.1.3.16
r354	non enzymatic reaction	L-1-Pyrroline-3-hydroxy-5-carboxylate[c] + H2O[c] => 4hglusa[c]				Arginine and proline metabolism	0	0	1000	0	2	non enzymatic reaction	reaction added for gap filling
r355	SACE_1978proline dehydrogenase	L-erythro-4-Hydroxyglutamate[c] + NADH[c] + H[c] => 4hglusa[c] + NAD[c] + H2O[c]	(SACE_1978) or (SACE_1979)	SACE_1978,SACE_1979		Arginine and proline metabolism	0	0	1000	0	2	1.5.99.8
r356	D-amino acid oxidase	cis-4-Hydroxy-D-proline[c] + O2[c] => 1-Pyrroline-4-hydroxy-2-carboxylate[c] + H2O2[c]	(SACE_0979)	SACE_0979		Arginine and proline metabolism	0	0	1000	0	2	1.4.3.3
r357	no synthase oxygenase	NADPH[c] + 2 N-omega-Hydroxyarginine[c] + 2 O2[c] + H[c] <=> NADP[c] + 2 NO[c] + 2 L-Citrulline[c] + 2 H2O[c]	(SACE_5845) or (SACE_7255)	SACE_5845,SACE_7255		Arginine and proline metabolism	1	-1000	1000	0	2	1.14.13.39
r358	trans-4-Hydroxy-L-proline:(acceptor) oxidoreductase	trans-4-Hydroxy-L-proline[c] + FAD[c] <=> L-1-Pyrroline-3-hydroxy-5-carboxylate[c] + FADH2[c]				Arginine and proline metabolism	1	-1000	1000	0	2	1.5.-.-	reactopm added for proline degradation
r359	ATP phosphoribosyltransferase	ATP[c] + prpp[c] <=> 1-(5-Phospho-D-ribosyl)-ATP[c] + Diphosphate[c]	(SACE_2238)	SACE_2238		Histidine metabolism	1	-1000	1000	0	2	2.4.2.17
r360	phosphoribosyl-ATP pyrophosphatase	1-(5-Phospho-D-ribosyl)-ATP[c] + H2O[c] => Phosphoribosyl-AMP[c] + Diphosphate[c]	(SACE_2237)	SACE_2237		Histidine metabolism	0	0	1000	0	2	3.6.1.31
r361	phosphoribosyl-AMP cyclohydrolase	Phosphoribosyl-AMP[c] + H2O[c] => 5-(5-Phospho-D-ribosylaminoformimino)-1-(5-phosphoribosyl)-imidazole-4-carboxamide[c]	(SACE_5755)	SACE_5755		Histidine metabolism	0	0	1000	0	2	3.5.4.19
r362	1-(5-phosphoribosylamino)methylideneamino] imidazole-4-carboxamide isomerase	5-(5-Phospho-D-ribosylaminoformimino)-1-(5-phosphoribosyl)-imidazole-4-carboxamide[c] => N-(5'-Phospho-D-1'-ribulosylformimino)-5-amino-1-(5''-phospho-D-ribosyl)-4-imidazolecarboxamide[c]	(SACE_5759)	SACE_5759		Histidine metabolism	0	0	1000	0	2	5.3.1.16
r363	imidazoleglycerol-phosphate synthase cyclase	N-(5'-Phospho-D-1'-ribulosylformimino)-5-amino-1-(5''-phospho-D-ribosyl)-4-imidazolecarboxamide[c] + L-Glutamine[c] => eig3p[c] + aicar[c] + L-Glutamate[c]	(SACE_5756 and SACE_5761)	SACE_5756,SACE_5761		Histidine metabolism	0	0	1000	0	2	HisF HisH
r364	imidazoleglycerol-phosphate dehydratase	eig3p[c] => imacp[c] + H2O[c]	(SACE_5776)	SACE_5776		Histidine metabolism	0	0	1000	0	2	4.2.1.19
r365	putative histidinol-phosphate aminotransferase	imacp[c] + L-Glutamate[c] <=> hisp[c] + 2-Oxoglutarate[c]	(SACE_0217) or (SACE_1581) or (SACE_4645) or (SACE_5777)	SACE_0217,SACE_1581,SACE_4645,SACE_5777		Histidine metabolism	1	-1000	1000	0	2	2.6.1.9
r366	L-Histidinol-phosphate phosphohydrolase	hisp[c] + H2O[c] => L-Histidinol[c] + Orthophosphate[c]	(SACE_6492)	SACE_6492		Histidine metabolism	0	0	1000	0	2	3.1.3.15	reaction added for His biosynthesis
r367	histidinol dehydrogenase	L-Histidinol[c] + NAD[c] => L-Histidinal[c] + NADH[c] + H[c]	(SACE_3119) or (SACE_5778)	SACE_3119,SACE_5778		Histidine metabolism	0	0	1000	0	2	1.1.1.23
r368	histidinol dehydrogenase	L-Histidinal[c] + H2O[c] + NAD[c] => L-Histidine[c] + NADH[c] + H[c]	(SACE_3119) or (SACE_5778)	SACE_3119,SACE_5778		Histidine metabolism	0	0	1000	0	2	1.1.1.23
r369	SACE_2888aromatic-L-amino-acid decarboxylase	L-Histidine[c] <=> Histamine[c] + CO2[c]	(SACE_2888)	SACE_2888		Histidine metabolism	1	-1000	1000	0	2	4.1.1.28
r370	histidine ammonia-lyase	L-Histidine[c] => Urocanate[c] + NH3[c]	(SACE_4848) or (SACE_6407)	SACE_4848,SACE_6407		Histidine metabolism	0	0	1000	0	2	4.3.1.3
r371	urocanate hydratase	Urocanate[c] + H2O[c] => 4-Imidazolone-5-propanoate[c]	(SACE_6406)	SACE_6406		Histidine metabolism	0	0	1000	0	2	4.2.1.49
r372		4-Imidazolone-5-propanoate[c] + H2O[c] <=> 4-Oxoglutaramate[c] + Formate[c] + NH3[c]				Histidine metabolism	1	-1000	1000	0	2	non-enzymatic	reaction added for histidine degradation
r373		4-Oxoglutaramate[c] + H2O[c] => 2-Oxoglutarate[c] + NH3[c]				Histidine metabolism	0	0	1000	0	2	non-enzymatic hydrolysis	reaction added for histidine degradation
r374	PheA/TfdB family FAD-binding monooxygenase	O2[c] + 2 4-Imidazolone-5-propanoate[c] => 2 Hydantoin-5-propionate[c]	(SACE_1671) or (SACE_3584) or (SACE_6561)	SACE_1671,SACE_3584,SACE_6561		Histidine metabolism	0	0	1000	0	2	1.14.13.-
r375		Hydantoin-5-propionate[c] + H2O[c] <=> N-Carbamyl-L-glutamate[c]				Histidine metabolism	1	-1000	1000	0	2		reaction added for histidine degradation
r376	N-carbamyl-L-glutamate amidohydrolase	N-Carbamyl-L-glutamate[c] + H2O[c] => L-Glutamate[c] + NH3[c] + CO2[c]				Histidine metabolism	0	0	1000	0	2	3.5.1.87	reaction added for histidine degradation
r377	putative imidazolonepropionase (imidazolone-5-propionate hydrolase)	4-Imidazolone-5-propanoate[c] + H2O[c] <=> nflgln[c]	(SACE_6403)	SACE_6403		Histidine metabolism	1	-1000	1000	0	2	3.5.2.7
r378	SACE_0343aldehyde dehydrogenase （NAD)	Imidazole-4-acetaldehyde[c] + NAD[c] + H2O[c] <=> Imidazole-4-acetate[c] + NADH[c] + H[c]	(SACE_0343) or (SACE_1341) or (SACE_2377) or (SACE_2783) or (SACE_2915) or (SACE_3880) or (SACE_6014) or (SACE_6249) or (SACE_6565) or (SACE_6566)	SACE_0343,SACE_1341,SACE_2377,SACE_2783,SACE_2915,SACE_3880,SACE_6014,SACE_6249,SACE_6565,SACE_6566		Histidine metabolism	1	-1000	1000	0	2	1.2.1.3
r379	putative flavin-containing monoamine oxidase	N-Methylhistamine[c] + H2O[c] + O2[c] => Methylimidazoleacetaldehyde[c] + NH3[c] + H2O2[c]	(SACE_4116) or (SACE_4854)	SACE_4116,SACE_4854		Histidine metabolism	0	0	1000	0	2	1.4.3.4
r380	SACE_0626putative tRNA/rRNA methyltransferase	L-Histidine[c] + amet[c] <=> NPmehis[c] + ahcys[c]	(SACE_0626) or (SACE_1075) or (SACE_1452) or (SACE_1814) or (SACE_2602) or (SACE_2878) or (SACE_4650) or (SACE_5595) or (SACE_6107) or (SACE_6809)	SACE_0626,SACE_1075,SACE_1452,SACE_1814,SACE_2602,SACE_2878,SACE_4650,SACE_5595,SACE_6107,SACE_6809		Histidine metabolism	1	-1000	1000	0	2	2.1.1.-
r381	SACE_2888aromatic-L-amino-acid decarboxylase	L-Tyrosine[c] => Tyramine[c] + CO2[c]	(SACE_2888)	SACE_2888		Tyrosine metabolism	0	0	1000	0	2	4.1.1.28
r382	putative flavin-containing monoamine oxidase	Tyramine[c] + H2O[c] + O2[c] => 4-Hydroxyphenylacetaldehyde[c] + NH3[c] + H2O2[c]	(SACE_4116) or (SACE_4854)	SACE_4116,SACE_4854		Tyrosine metabolism	0	0	1000	0	2	1.4.3.4
r383	putative histidinol-phosphate aminotransferase	L-Tyrosine[c] + 2-Oxoglutarate[c] <=> 34hpp[c] + L-Glutamate[c]	(SACE_0217) or (SACE_1581) or (SACE_4645) or (SACE_5777)	SACE_0217,SACE_1581,SACE_4645,SACE_5777		Tyrosine metabolism	1	-1000	1000	0	2	2.6.1.9
r384	4-hydroxyphenylpyruvate dioxygenase	34hpp[c] + O2[c] => Homogentisate[c] + CO2[c]	(SACE_0905)	SACE_0905		Tyrosine metabolism	0	0	1000	0	2	1.13.11.27
r385	homogentisate 1,2-dioxygenase	Homogentisate[c] + O2[c] => 4-Maleylacetoacetate[c]	(SACE_3944)	SACE_3944		Tyrosine metabolism	0	0	1000	0	2	1.13.11.5
r386	4-Maleylacetoacetate cis-trans-isomerase	4-Maleylacetoacetate[c] <=> 4-Fumarylacetoacetate[c]				Tyrosine metabolism	1	-1000	1000	0	2	5.2.1.2	reaction added for tyrosine degradation
r387	SACE_2888aromatic-L-amino-acid decarboxylase	3,4-Dihydroxy-L-phenylalanine[c] => Dopamine[c] + CO2[c]	(SACE_2888)	SACE_2888		Tyrosine metabolism	0	0	1000	0	2	4.1.1.28
r388	putative flavin-containing monoamine oxidase	Dopamine[c] + H2O[c] + O2[c] => 3,4-Dihydroxyphenylacetaldehyde[c] + NH3[c] + H2O2[c]	(SACE_4116) or (SACE_4854)	SACE_4116,SACE_4854		Tyrosine metabolism	0	0	1000	0	2	1.4.3.4
r389	putative flavin-containing monoamine oxidase	3-Methoxytyramine[c] + H2O[c] + O2[c] <=> 3-Methoxy-4-hydroxyphenylacetaldehyde[c] + H2O2[c] + NH3[c]	(SACE_4116) or (SACE_4854)	SACE_4116,SACE_4854		Tyrosine metabolism	1	-1000	1000	0	2	1.4.3.4
r390	putative flavin-containing monoamine oxidase	L-Noradrenaline[c] + H2O[c] + O2[c] => 3,4-Dihydroxymandelaldehyde[c] + NH3[c] + H2O2[c]	(SACE_4116) or (SACE_4854)	SACE_4116,SACE_4854		Tyrosine metabolism	0	0	1000	0	2	1.4.3.4
r391	SACE_1535putative zinc-type alcohol dehydrogenase transmembrane protein	3,4-Dihydroxymandelaldehyde[c] + NADH[c] + H[c] <=> 3,4-Dihydroxyphenylethyleneglycol[c] + NAD[c]	(SACE_1535) or (SACE_2374) or (SACE_2733) or (SACE_2738) or (SACE_2944) or (SACE_2945) or (SACE_3519) or (SACE_4085) or (SACE_4163) or (SACE_4519) or (SACE_4852) or (SACE_6396)	SACE_1535,SACE_2374,SACE_2733,SACE_2738,SACE_2944,SACE_2945,SACE_3519,SACE_4085,SACE_4163,SACE_4519,SACE_4852,SACE_6396		Tyrosine metabolism	1	-1000	1000	0	2	1.1.1.1
r392	putative flavin-containing monoamine oxidase	L-Normetanephrine[c] + H2O[c] + O2[c] <=> 3-Methoxy-4-hydroxyphenylglycolaldehyde[c] + NH3[c] + H2O2[c]	(SACE_4116) or (SACE_4854)	SACE_4116,SACE_4854		Tyrosine metabolism	1	-1000	1000	0	2	1.4.3.4
r393	putative flavin-containing monoamine oxidase	L-Metanephrine[c] + H2O[c] + O2[c] <=> 3-Methoxy-4-hydroxyphenylglycolaldehyde[c] + H2O2[c] + Methylamine[c]	(SACE_4116) or (SACE_4854)	SACE_4116,SACE_4854		Tyrosine metabolism	1	-1000	1000	0	2	1.4.3.4
r394	putative flavin-containing monoamine oxidase	L-Adrenaline[c] + H2O[c] + O2[c] <=> 3,4-Dihydroxymandelaldehyde[c] + Methylamine[c] + H2O2[c]	(SACE_4116) or (SACE_4854)	SACE_4116,SACE_4854		Tyrosine metabolism	1	-1000	1000	0	2	1.4.3.4
r395	SACE_26265-carboxymethyl-2-hydroxymuconate delta-isomerase	5-Carboxymethyl-2-hydroxymuconate[c] <=> 5-Carboxy-2-oxohept-3-enedioate[c]	(SACE_2626)	SACE_2626		Tyrosine metabolism	1	-1000	1000	0	2	5.3.3.10
r396	SACE_06992,4-dihydroxyhept-2-ene-1,7-dioic acid aldolase	24dhhed[c] => sucsal[c] + Pyruvate[c]	(SACE_0699)	SACE_0699		Tyrosine metabolism	0	0	1000	0	2	HpaI
r397	SACE_1671PheA/TfdB family FAD-binding monooxygenase	Tyramine[c] + O2[c] + NADH[c] + H[c] => Dopamine[c] + NAD[c] + H2O[c]	(SACE_1671) or (SACE_3584) or (SACE_6561)	SACE_1671,SACE_3584,SACE_6561		Tyrosine metabolism	0	0	1000	0	2	1.14.13.-
r398	fumarylacetoacetase hydrolase	4-Fumarylacetoacetate[c] + H2O[c] => Acetoacetate[c] + Fumarate[c]	(SACE_0136) or (SACE_3410) or (SACE_3942)	SACE_0136,SACE_3410,SACE_3942		Tyrosine metabolism	0	0	1000	0	2	3.7.1.2
r399	putative 2-hydroxyhepta-2,4-diene-1,7-dioate isomerase	Homogentisate[c] + O2[c] + NADPH[c] <=> gentisald[c] + CO2[c] + NADP[c] + H[c] + H2O[c]	(SACE_1233) or (SACE_3828) or (SACE_3938) or (SACE_6202)	SACE_1233,SACE_3828,SACE_3938,SACE_6202		Tyrosine metabolism	0	0	0	0	2	4.1.1.- 5.3.3.-
r400	SACE_1309putative peptide monooxygenase	Homogentisate[c] + O2[c] <=> gentisald[c] + CO2[c] + H2O[c]	(SACE_1309) or (SACE_3033)	SACE_1309,SACE_3033		Tyrosine metabolism	1	-1000	1000	0	2	1.13.12.-
r401	putative 2-hydroxyhepta-2,4-diene-1,7-dioate isomerase	L-Dopachrome[c] <=> 5,6-Dihydroxyindole[c] + CO2[c]	(SACE_1233) or (SACE_3828) or (SACE_3938) or (SACE_6202)	SACE_1233,SACE_3828,SACE_3938,SACE_6202		Tyrosine metabolism	1	-1000	1000	0	2	4.1.1.- 5.3.3.-
r402	SACE_0626putative tRNA/rRNA methyltransferase	N-Methyltyramine[c] + amet[c] <=> Hordenine[c] + ahcys[c]	(SACE_0626) or (SACE_1075) or (SACE_1452) or (SACE_1814) or (SACE_2602) or (SACE_2878) or (SACE_4650) or (SACE_5595) or (SACE_6107) or (SACE_6809)	SACE_0626,SACE_1075,SACE_1452,SACE_1814,SACE_2602,SACE_2878,SACE_4650,SACE_5595,SACE_6107,SACE_6809		Tyrosine metabolism	1	-1000	1000	0	2	2.1.1.-
r403	putative 2-hydroxyhepta-2,4-diene-1,7-dioate isomerase	2-Hydroxyhepta-2,4-dienedioate[c] => 2-Oxohept-3-enedioate[c]	(SACE_1233) or (SACE_3938)	SACE_1233,SACE_3938		Tyrosine metabolism	0	0	1000	0	2	4.1.1.- 5.3.3.-
r404	SACE_61505-oxopent-3-ene-1,2,5-tricarboxylate decarboxylase	5-Carboxy-2-oxohept-3-enedioate[c] <=> 2-Hydroxyhepta-2,4-dienedioate[c] + CO2[c]	(SACE_6150)	SACE_6150		Tyrosine metabolism	1	-1000	1000	0	2	4.1.1.68
r405	SACE_5883N-acetylglutamate synthase	4-Hydroxyphenylacetyl-CoA[c] + Glycine[c] <=> 4-Hydroxyphenylacetylglycine[c] + CoA[c]	(SACE_5883) or (SACE_5884) or (SACE_6204)	SACE_5883,SACE_5884,SACE_6204		Tyrosine metabolism	1	-1000	1000	0	2	2.3.1.-
r406	putative 2-hydroxyhepta-2,4-diene-1,7-dioate isomerase	2-Carboxy-2,3-dihydro-5,6-dihydroxyindole[c] => 5,6-Dihydroxyindole[c] + CO2[c]	(SACE_1233) or (SACE_3828) or (SACE_3938) or (SACE_6202)	SACE_1233,SACE_3828,SACE_3938,SACE_6202		Tyrosine metabolism	0	0	1000	0	2	4.1.1.- 5.3.3.-
r407	L-Phenylalanine racemase (ATP-hydrolysing)	ATP[c] + L-Phenylalanine[c] + H2O[c] => AMP[c] + Diphosphate[c] + D-Phenylalanine[c]				Phenylalanine metabolism	0	0	1000	0	2	5.1.1.11	reaction added for gap filling
r408	D-amino-acid dehydrogenase small subunit	D-Phenylalanine[c] + H2O[c] + Quinone[c] => Phenylpyruvate[c] + NH3[c] + Hydroquinone[c]	(SACE_4702 and SACE_5427)	SACE_4702,SACE_5427		Phenylalanine metabolism	0	0	1000	0	2	1.4.5.1
r409	putative histidinol-phosphate aminotransferase	L-Phenylalanine[c] + 2-Oxoglutarate[c] <=> Phenylpyruvate[c] + L-Glutamate[c]	(SACE_0217) or (SACE_1581) or (SACE_4645) or (SACE_5777)	SACE_0217,SACE_1581,SACE_4645,SACE_5777		Phenylalanine metabolism	1	-1000	1000	0	2	2.6.1.9
r410	4-hydroxyphenylpyruvate dioxygenase	Phenylpyruvate[c] + O2[c] => 2-Hydroxyphenylacetate[c] + CO2[c]	(SACE_0905)	SACE_0905		Phenylalanine metabolism	0	0	1000	0	2	1.13.11.27
r411	L-phenylalanine:oxygen oxidoreductase (decarboxylating)	L-Phenylalanine[c] + O2[c] => 2-Phenylacetamide[c] + CO2[c]	(SACE_4668)	SACE_4668		Phenylalanine metabolism	0	0	1000	0	2	1.11.1.21
r412	SACE_1914amidase	2-Phenylacetamide[c] + H2O[c] => pac[c] + NH3[c]	(SACE_1914) or (SACE_4293) or (SACE_4294) or (SACE_5032)	SACE_1914,SACE_4293,SACE_4294,SACE_5032		Phenylalanine metabolism	0	0	1000	0	2	3.5.1.4
r413	SACE_2888aromatic-L-amino-acid decarboxylase	L-Phenylalanine[c] => Phenethylamine[c] + CO2[c]	(SACE_2888)	SACE_2888		Phenylalanine metabolism	0	0	1000	0	2	4.1.1.28
r414	putative flavin-containing monoamine oxidase	Phenethylamine[c] + O2[c] + H2O[c] <=> Phenylacetaldehyde[c] + NH3[c] + H2O2[c]	(SACE_4116) or (SACE_4854)	SACE_4116,SACE_4854		Phenylalanine metabolism	1	-1000	1000	0	2	1.4.3.4
r415	aldehyde dehydrogenase family protein	Phenylacetaldehyde[c] + NAD[c] + H2O[c] => pac[c] + NADH[c] + H[c]	(SACE_5353)	SACE_5353		Phenylalanine metabolism	0	0	1000	0	2	1.2.1.39
r416	phenylacetate-coenzyme A ligase	ATP[c] + pac[c] + CoA[c] => AMP[c] + Diphosphate[c] + Phenylacetyl-CoA[c]	(SACE_1120) or (SACE_3542)	SACE_1120,SACE_3542		Phenylalanine metabolism	0	0	1000	0	2	6.2.1.30
r417	phenylacetyl-CoA:oxygen oxidoreductase	Phenylacetyl-CoA[c] + O2[c] + NADPH[c] + H[c] => 2-(1,2-Epoxy-1,2-dihydrophenyl)acetyl-CoA[c] + H2O[c] + NADP[c]	(SACE_3544 and SACE_3545 and SACE_3546 and SACE_3547 and SACE_3548)	SACE_3544,SACE_3545,SACE_3546,SACE_3547,SACE_3548		Phenylalanine metabolism	0	0	1000	0	2	1.14.13.149
r418	2-(1,2-epoxy-1,2-dihydrophenyl)acetyl-CoA isomerase	2-(1,2-Epoxy-1,2-dihydrophenyl)acetyl-CoA[c] <=> 2-Oxepin-2(3H)-ylideneacetyl-CoA[c]	(SACE_1028) or (SACE_2748)	SACE_1028,SACE_2748		Phenylalanine metabolism	1	-1000	1000	0	2	5.3.3.18
r419	oxepin-CoA hydrolase	2-Oxepin-2(3H)-ylideneacetyl-CoA[c] + H2O[c] => 3oxdhscoa[c]	(SACE_3543)	SACE_3543		Phenylalanine metabolism	0	0	1000	0	2	3.3.2.12
r420	3-oxo-5,6-dehydrosuberyl-CoA semialdehyde:NADP+ oxidoreductase	3oxdhscoa[c] + NADP[c] + H2O[c] => 3-Oxo-5,6-dehydrosuberyl-CoA[c] + NADPH[c] + H[c]	(SACE_3543)	SACE_3543		Phenylalanine metabolism	0	0	1000	0	2	1.2.1.91
r421	3-oxo-5,6-didehydrosuberyl-CoA thiolase	3-Oxo-5,6-dehydrosuberyl-CoA[c] + CoA[c] => 5-Carboxy-2-pentenoyl-CoA[c] + Acetyl-CoA[c]	(SACE_1028) or (SACE_2748)	SACE_1028,SACE_2748		Phenylalanine metabolism	0	0	1000	0	2	2.3.1.223
r422	putative enoyl-CoA hydratase/isomerase family protein	5-Carboxy-2-pentenoyl-CoA[c] + H2O[c] => (3S)-3-Hydroxyadipyl-CoA[c]	(SACE_1458) or (SACE_3084) or (SACE_3989) or (SACE_6207)	SACE_1458,SACE_3084,SACE_3989,SACE_6207		Phenylalanine metabolism	0	0	1000	0	2	4.2.1.17
r423	SACE_0092short-chain dehydrogenase/reductase SDR	(3S)-3-Hydroxyadipyl-CoA[c] + NAD[c] => 3-Oxoadipyl-CoA[c] + NADH[c] + H[c]	(SACE_1902) or (SACE_4006)	SACE_1902,SACE_4006		Phenylalanine metabolism	0	0	1000	0	2	1.1.1.157 1.1.1.35
r424	SACE_2685putative metal-dependent amidase/aminoacylase/carboxypeptidase	Benzoate[c] + Glycine[c] => Hippurate[c] + H2O[c]	(SACE_2685)	SACE_2685		Phenylalanine metabolism	0	0	1000	0	2	3.5.1.32
r425	3-（3-hydroxyphenyl)propionate hydroxylase	trans-3-Hydroxycinnamate[c] + O2[c] + NADH[c] + H[c] => trans-2,3-Dihydroxycinnamate[c] + H2O[c] + NAD[c]	(SACE_2877)	SACE_2877		Phenylalanine metabolism	0	0	1000	0	2	1.14.13.127
r426	ferredoxin reductase	trans-Cinnamate[c] + O2[c] + NADH[c] + H[c] => cis-3-(3-Carboxyethenyl)-3,5-cyclohexadiene-1,2-diol[c] + NAD[c]	(SACE_2839 and SACE_3145 and SACE_3146 and SACE_3433 and SACE_4486 and SACE_4511 and SACE_5609)	SACE_2839,SACE_3145,SACE_3146,SACE_3433,SACE_4486,SACE_4511,SACE_5609		Phenylalanine metabolism	0	0	1000	0	2	1.14.12.19
r427	ferredoxin reductase	Phenylpropanoate[c] + O2[c] + NADH[c] + H[c] => cis-3-(Carboxy-ethyl)-3,5-cyclo-hexadiene-1,2-diol[c] + NAD[c]	(SACE_2839 and SACE_3145 and SACE_3146 and SACE_3433 and SACE_4486 and SACE_4511 and SACE_5609)	SACE_2839,SACE_3145,SACE_3146,SACE_3433,SACE_4486,SACE_4511,SACE_5609		Phenylalanine metabolism	0	0	1000	0	2	1.14.12.19
r428	3-（3-hydroxyphenyl)propionate hydroxylase	3hpppa[c] + O2[c] + NADH[c] + H[c] => 3-(2,3-Dihydroxyphenyl)propanoate[c] + H2O[c] + NAD[c]	(SACE_2877)	SACE_2877		Phenylalanine metabolism	0	0	1000	0	2	1.14.13.127
r429	SACE_1671PheA/TfdB family FAD-binding monooxygenase	2-Hydroxyphenylacetate[c] <=> 2,6-Dihydroxyphenylacetate[c]	(SACE_1671) or (SACE_3584) or (SACE_6561)	SACE_1671,SACE_3584,SACE_6561		Phenylalanine metabolism	1	-1000	1000	0	2	1.14.13.-
r430	SACE_5883N-acetylglutamate synthase	Phenylacetyl-CoA[c] + Glycine[c] => Phenylacetylglycine[c] + CoA[c]	(SACE_5883) or (SACE_5884) or (SACE_6204)	SACE_5883,SACE_5884,SACE_6204		Phenylalanine metabolism	0	0	1000	0	2	2.3.1.-
r431	tryptophanase	L-Tryptophan[c] + H2O[c] => Indole[c] + Pyruvate[c] + NH3[c]	(SACE_1957)	SACE_1957		Tryptophan metabolism	0	0	1000	0	2	4.1.99.1
r432	SACE_4055tryptophan 2,3-dioxygenase	L-Tryptophan[c] + O2[c] => L-Formylkynurenine[c]	(SACE_4055)	SACE_4055		Tryptophan metabolism	0	0	1000	0	2	1.13.11.11
r433	SACE_0279kynureninase （kyurenine hydrolase)	L-Formylkynurenine[c] + H2O[c] => Formylanthranilate[c] + L-Alanine[c]	(SACE_0279) or (SACE_4057)	SACE_0279,SACE_4057		Tryptophan metabolism	0	0	1000	0	2	3.7.1.3
r434	SACE_2888aromatic-L-amino-acid decarboxylase	L-Tryptophan[c] => Tryptamine[c] + CO2[c]	(SACE_2888)	SACE_2888		Tryptophan metabolism	0	0	1000	0	2	4.1.1.28
r435	putative flavin-containing monoamine oxidase	Tryptamine[c] + H2O[c] + O2[c] => Indole-3-acetaldehyde[c] + NH3[c] + H2O2[c]	(SACE_4116) or (SACE_4854)	SACE_4116,SACE_4854		Tryptophan metabolism	0	0	1000	0	2	1.4.3.4
r436	SACE_0343aldehyde dehydrogenase (NAD)	Indole-3-acetaldehyde[c] + NAD[c] + H2O[c] => Indole-3-acetate[c] + NADH[c] + H[c]	(SACE_0343) or (SACE_1341) or (SACE_2377) or (SACE_2783) or (SACE_2915) or (SACE_3880) or (SACE_6014) or (SACE_6249) or (SACE_6565) or (SACE_6566)	SACE_0343,SACE_1341,SACE_2377,SACE_2783,SACE_2915,SACE_3880,SACE_6014,SACE_6249,SACE_6565,SACE_6566		Tryptophan metabolism	0	0	1000	0	2	1.2.1.3
r437	SACE_1914amidase	Indole-3-acetate[c] + NH3[c] => (Indol-3-yl)acetamide[c] + H2O[c]	(SACE_1914) or (SACE_4293) or (SACE_4294) or (SACE_5032)	SACE_1914,SACE_4293,SACE_4294,SACE_5032		Tryptophan metabolism	0	0	1000	0	2	3.5.1.4
r438	SACE_2888aromatic-L-amino-acid decarboxylase	Oxitriptan[c] => Serotonin[c] + CO2[c]	(SACE_2888)	SACE_2888		Tryptophan metabolism	0	0	1000	0	2	4.1.1.28
r439	putative flavin-containing monoamine oxidase	Serotonin[c] + H2O[c] + O2[c] => 5-Hydroxyindoleacetaldehyde[c] + NH3[c] + H2O2[c]	(SACE_4116) or (SACE_4854)	SACE_4116,SACE_4854		Tryptophan metabolism	0	0	1000	0	2	1.4.3.4
r440	SACE_0343aldehyde dehydrogenase (NAD)	5-Hydroxyindoleacetaldehyde[c] + NAD[c] + H2O[c] => 5-Hydroxyindoleacetate[c] + H[c] + NADH[c]	(SACE_0343) or (SACE_1341) or (SACE_2377) or (SACE_2783) or (SACE_2915) or (SACE_3880) or (SACE_6014) or (SACE_6249) or (SACE_6565) or (SACE_6566)	SACE_0343,SACE_1341,SACE_2377,SACE_2783,SACE_2915,SACE_3880,SACE_6014,SACE_6249,SACE_6565,SACE_6566		Tryptophan metabolism	0	0	1000	0	2	1.2.1.3
r441	SACE_0279kynureninase (kyurenine hydrolase)	3-Hydroxy-L-kynurenine[c] + H2O[c] => 3-Hydroxyanthranilate[c] + L-Alanine[c]	(SACE_0279) or (SACE_4057)	SACE_0279,SACE_4057		Tryptophan metabolism	0	0	1000	0	2	3.7.1.3
r442	catalase	2 3-Hydroxyanthranilate[c] + 4 O2[c] => Cinnavalininate[c] + 2 O2S[c] + 2 H2O2[c] + 2 H[c]	(SACE_0302) or (SACE_3861) or (SACE_4668)	SACE_0302,SACE_3861,SACE_4668		Tryptophan metabolism	0	0	1000	0	2	1.11.1.6 1.11.1.21
r443	SACE_2888aromatic-L-amino-acid decarboxylase	5-Hydroxykynurenine[c] => 5-Hydroxykynurenamine[c] + CO2[c]	(SACE_2888)	SACE_2888		Tryptophan metabolism	0	0	1000	0	2	4.1.1.28
r444	putative flavin-containing monoamine oxidase	5-Hydroxykynurenamine[c] + H2O[c] + O2[c] => 4,6-Dihydroxyquinoline[c] + NH3[c] + H2O2[c] + H2O[c]	(SACE_4116) or (SACE_4854)	SACE_4116,SACE_4854		Tryptophan metabolism	0	0	1000	0	2	1.4.3.4
r445	putative cytochrome P450	Melatonin[c] + cytP450r[c] + O2[c] => 6-Hydroxymelatonin[c] + cytP450o[c] + H2O[c]	(SACE_0125) or (SACE_2802) or (SACE_4144) or (SACE_4205) or (SACE_5309)	SACE_0125,SACE_2802,SACE_4144,SACE_4205,SACE_5309		Tryptophan metabolism	0	0	1000	0	2	1.14.14.1
r446	SACE_0279kynureninase (kyurenine hydrolase)	L-Kynurenine[c] + H2O[c] => Anthranilate[c] + L-Alanine[c]	(SACE_0279) or (SACE_4057)	SACE_0279,SACE_4057		Tryptophan metabolism	0	0	1000	0	2	3.7.1.3
r447	putative flavin-containing monoamine oxidase	3-Hydroxykynurenamine[c] + O2[c] => 4,8-Dihydroxyquinoline[c] + NH3[c] + H2O2[c]	(SACE_4116) or (SACE_4854)	SACE_4116,SACE_4854		Tryptophan metabolism	0	0	1000	0	2	1.4.3.4
r448	SACE_0626putative tRNA/rRNA methyltransferase	Serotonin[c] + 5mthf[c] <=> 5-Methoxytryptamine[c] + Tetrahydrofolate[c]	(SACE_0626) or (SACE_1075) or (SACE_1452) or (SACE_1814) or (SACE_2602) or (SACE_2878) or (SACE_4650) or (SACE_5595) or (SACE_6107) or (SACE_6809)	SACE_0626,SACE_1075,SACE_1452,SACE_1814,SACE_2602,SACE_2878,SACE_4650,SACE_5595,SACE_6107,SACE_6809		Tryptophan metabolism	1	-1000	1000	0	2	2.1.1.-
r449	phospho-2-dehydro-3-deoxyheptonate aldolase	Phosphoenolpyruvate[c] + e4p[c] + H2O[c] => 2dda7p[c] + Orthophosphate[c]	(SACE_1708) or (SACE_2874) or (SACE_4114) or (SACE_5545) or (SACE_6347)	SACE_1708,SACE_2874,SACE_4114,SACE_5545,SACE_6347		Phenylalanine, tyrosine and tryptophan biosynthesis	0	0	1000	0	2	2.5.1.54
r450	3-dehydroquinate synthase	2dda7p[c] => 3-Dehydroquinate[c] + Orthophosphate[c]	(SACE_2067) or (SACE_2868)	SACE_2067,SACE_2868		Phenylalanine, tyrosine and tryptophan biosynthesis	0	0	1000	0	2	4.2.3.4
r451	3-dehydroquinate dehydratase, type II	3-Dehydroquinate[c] <=> 3-Dehydroshikimate[c] + H2O[c]	(SACE_2068) or (SACE_2865)	SACE_2068,SACE_2865		Phenylalanine, tyrosine and tryptophan biosynthesis	1	-1000	1000	0	2	4.2.1.10
r452	shikimate 5-dehydrogenase	3-Dehydroshikimate[c] + NADPH[c] + H[c] <=> Shikimate[c] + NADP[c]	(SACE_2055) or (SACE_2867)	SACE_2055,SACE_2867		Phenylalanine, tyrosine and tryptophan biosynthesis	1	-1000	1000	0	2	1.1.1.25
r453	shikimate kinase I	ATP[c] + Shikimate[c] => ADP[c] + skm3p[c]	(SACE_2066)	SACE_2066		Phenylalanine, tyrosine and tryptophan biosynthesis	0	0	1000	0	2	2.7.1.71
r454	3-phosphoshikimate 1-carboxyvinyltransferase	Phosphoenolpyruvate[c] + skm3p[c] <=> Orthophosphate[c] + 3psme[c]	(SACE_6435)	SACE_6435		Phenylalanine, tyrosine and tryptophan biosynthesis	1	-1000	1000	0	2	2.5.1.19
r455	chorismate synthase	3psme[c] => Chorismate[c] + Orthophosphate[c]	(SACE_2065)	SACE_2065		Phenylalanine, tyrosine and tryptophan biosynthesis	0	0	1000	0	2	4.2.3.5
r456	chorismate mutase	Chorismate[c] <=> Prephenate[c]	(SACE_7067)	SACE_7067		Phenylalanine, tyrosine and tryptophan biosynthesis	1	-1000	1000	0	2	5.4.99.5
r457	anthranilate synthase component I	Chorismate[c] + NH3[c] => Anthranilate[c] + Pyruvate[c] + H2O[c]	(SACE_2689 or SACE_5753 and SACE_5354)	SACE_2689,SACE_5753,SACE_5354		Phenylalanine, tyrosine and tryptophan biosynthesis	0	0	1000	0	2	4.1.3.27
r458	anthranilate synthase component I	Chorismate[c] + L-Glutamine[c] => Anthranilate[c] + Pyruvate[c] + L-Glutamate[c]	(SACE_2689 or SACE_5753 and SACE_5354)	SACE_2689,SACE_5753,SACE_5354		Phenylalanine, tyrosine and tryptophan biosynthesis	0	0	1000	0	2	4.1.3.27
r459	anthranilate phosphoribosyltransferase	Anthranilate[c] + prpp[c] <=> pran[c] + Diphosphate[c]	(SACE_1681)	SACE_1681		Phenylalanine, tyrosine and tryptophan biosynthesis	1	-1000	1000	0	2	2.4.2.18
r460	1-1-(5-phosphoribosyl)-5-[(5-phosphoribosylamino)methylideneamino] imidazole-4-carboxamide isomerase	pran[c] <=> 2cpr5p[c]	(SACE_5759)	SACE_5759		Phenylalanine, tyrosine and tryptophan biosynthesis	1	-1000	1000	0	2	5.3.1.24
r461	indole-3-glycerol-phosphate synthase	2cpr5p[c] <=> Indoleglycp[c] + CO2[c] + H2O[c]	(SACE_5750)	SACE_5750		Phenylalanine, tyrosine and tryptophan biosynthesis	1	-1000	1000	0	2	4.1.1.48
r462	tryptophan synthase alpha chain	Indoleglycp[c] <=> Indole[c] + g3p_D[c]	(SACE_5748)	SACE_5748		Phenylalanine, tyrosine and tryptophan biosynthesis	1	-1000	1000	0	2	4.2.1.20
r463	prephenate dehydratase (PDT)	Prephenate[c] <=> Phenylpyruvate[c] + H2O[c] + CO2[c]	(SACE_0152) or (SACE_1605)	SACE_0152,SACE_1605		Phenylalanine, tyrosine and tryptophan biosynthesis	1	-1000	1000	0	2	4.2.1.51
r464	prephenate dehydrogenase	Prephenate[c] + NAD[c] <=> 34hpp[c] + CO2[c] + NADH[c] + H[c]	(SACE_0231)	SACE_0231		Phenylalanine, tyrosine and tryptophan biosynthesis	1	-1000	1000	0	2	1.3.1.12
r465	prephenate dehydratase (PDT)	L-Arogenate[c] => L-Phenylalanine[c] + H2O[c] + CO2[c]	(SACE_0152) or (SACE_1605)	SACE_0152,SACE_1605		Phenylalanine, tyrosine and tryptophan biosynthesis	0	0	1000	0	2	4.2.1.51
r466	ribokinase:carbohydrate kinase, PfkB	ATP[c] + D-Fructose[c] => ADP[c] + beta-f6p[c]	(SACE_0647)	SACE_0647		Fructose and mannose metabolism	0	0	1000	0	2	2.7.1.4
r467	tagatose-bisphosphate aldolase	f1p[c] => dhap[c] + D-Glyceraldehyde[c]	(SACE_2420) or (SACE_6318) or (SACE_7180)	SACE_2420,SACE_6318,SACE_7180		Fructose and mannose metabolism	0	0	1000	0	2	4.1.2.13
r468	triose/dihydroxyacetone kinase / FAD-AMP lyase (cyclizing)	ATP[c] + D-Glyceraldehyde[c] => ADP[c] + g3p_D[c]	(SACE_4765)	SACE_4765		Fructose and mannose metabolism	0	0	1000	0	2	2.7.1.28
r469	putative 6-phosphofructokinase	ATP[c] + f1p[c] => ADP[c] + beta-fdp[c]	(SACE_2273)	SACE_2273		Fructose and mannose metabolism	0	0	1000	0	2	2.7.1.56
r470	L-fuculose-phosphate aldolase	fc1p[c] => dhap[c] + (S)-Lactaldehyde[c]	(SACE_5215)	SACE_5215		Fructose and mannose metabolism	0	0	1000	0	2	4.1.2.17
r471	mannose-6-phosphate isomerase, class I	beta-f6p[c] <=> man6p[c]	(SACE_6227) or (SACE_6457)	SACE_6227,SACE_6457		Fructose and mannose metabolism	1	-1000	1000	0	2	5.3.1.8
r472	phosphomannomutase/phosphoglucomutase	man6p[c] <=> man1p[c]	(SACE_6460) or (SACE_6548)	SACE_6460,SACE_6548		Fructose and mannose metabolism	1	-1000	1000	0	2	5.4.2.8
r473	mannose-1-phosphate guanyltransferase	GTP[c] + man1p[c] => Diphosphate[c] + GDP-mannose[c]	(SACE_6470)	SACE_6470		Fructose and mannose metabolism	0	0	1000	0	2	2.7.7.13
r474	putative fructose-specific permease	N(pi)-phospho-L-histidine(Protein)[c] + D-Fructose[c] => histidine(Protein)[c] + f1p[c]	(SACE_2274 and SACE_2275)	SACE_2274,SACE_2275		Fructose and mannose metabolism	0	0	1000	0	2	2.7.1.202
r475	SACE_0948L-fucose isomerase, putative	6-Deoxy-L-galactose[c] <=> L-Fuculose[c]	(SACE_0948)	SACE_0948		Fructose and mannose metabolism	1	-1000	1000	0	2	5.3.1.25
r476	L-Rhamnose ketol-isomerase	L-Rhamnose[c] <=> L-Rhamnulose[c]	(SACE_4105)	SACE_4105		Fructose and mannose metabolism	1	-1000	1000	0	2	5.3.1.14	reaction added for Rhamnose utilization
r477	putative rhamnose kinase	ATP[c] + L-Rhamnulose[c] => ADP[c] + rml1p[c]	(SACE_4103)	SACE_4103		Fructose and mannose metabolism	0	0	1000	0	2	2.7.1.5
r478	glycosyl transferase, group 1 family protein,putative	GDP-mannose[c] <=> GDP[c] + Mannan[c]	(SACE_3177) or (SACE_4470) or (SACE_6905) or (SACE_6971)	SACE_3177,SACE_4470,SACE_6905,SACE_6971		Fructose and mannose metabolism	1	-1000	1000	0	2	2.4.1.-
r479	SACE_2747short chain dehydrogenase/reductase family oxidoreductase	srb6p[c] + NADP[c] => srb1p[c] + NADPH[c] + H	(SACE_2747) or (SACE_3080) or (SACE_4387) or (SACE_4696) or (SACE_5586) or (SACE_7048)	SACE_2747,SACE_3080,SACE_4387,SACE_4696,SACE_5586,SACE_7048		Fructose and mannose metabolism	0	0	1000	0	2	1.1.1.-
r480	D-Mannitol:NAD 2-oxidoreductase	Mannitol[c] + NAD[c] <=> D-Fructose[c] + NADH[c] + H[c]				Fructose and mannose metabolism	1	-1000	1000	0	2	1.1.1.11; 1.1.1.67	reaction added for mannitol utilization
r481	L-Rhamnulose-1-phosphate lactaldehyde-lyase	rml1p[c] => dhap[c] + (S)-Lactaldehyde[c]				Fructose and mannose metabolism	0	0	1000	0	2	4.1.2.19	reaction added for Rhamnose utilization
r482	ATP:D-mannose 6-phosphotransferase	ATP[c] + D-Mannose[c] => ADP[c] + man6p[c]				Fructose and mannose metabolism	0	0	1000	0	2	2.7.1.1; 2.7.1.7	reaction added for mannose utilization
r483	ATP:beta-D-Fructose 1-phosphotransferase	ATP[c] + D-Fructose[c] => ADP[c] + f1p[c]				Fructose and mannose metabolism	0	0	1000	0	2	2.7.1.3	reactuib added for fructose utilization
r484	acetolactate synthase large subunit	2ahethmpp[c] + Pyruvate[c] => alac_S[c] + thmpp[c]	(SACE_0604 and SACE_3465)	SACE_0604,SACE_3465		C5-Branched dibasic acid metabolism	0	0	1000	0	2	2.2.1.6
r485	SACE_6668succinyl-CoA synthetase subunit alpha	ATP[c] + Itaconate[c] + CoA[c] <=> ADP[c] + Orthophosphate[c] + Itaconyl-CoA[c]	(SACE_6668 and SACE_6669)	SACE_6668,SACE_6669		C5-Branched dibasic acid metabolism	1	-1000	1000	0	2	6.2.1.5
r486	D-Ribose 1,5-phosphomutase	r1p[c] <=> r5p_D[c]	(SACE_6460)	SACE_6460		purine metabolism	1	-1000	1000	0	2	5.4.2.2	reaction added (in KEGG but not in list)
r487	ADP-ribose pyrophosphatase	ADP-ribose[c] + H2O[c] => AMP[c] + r5p_D[c]	(SACE_5243)	SACE_5243		purine metabolism	0	0	1000	0	2	3.6.1.13
r488	phosphoribosylamine--glycine ligase	ATP[c] + 5-Phosphoribosylamine[c] + Glycine[c] => ADP[c] + Orthophosphate[c] + 5'-Phosphoribosylglycinamide[c]	(SACE_7168)	SACE_7168		purine metabolism	0	0	1000	0	2	6.3.4.13
r489	phosphoribosylglycinamide formyltransferase	10fthf[c] + 5'-Phosphoribosylglycinamide[c] <=> Tetrahydrofolate[c] + 5'-Phosphoribosyl-N-formylglycinamide[c]	(SACE_6665)	SACE_6665		purine metabolism	1	-1000	1000	0	2	2.1.2.2
r490	phosphoribosylformylglycinamidine synthase II	ATP[c] + 5'-Phosphoribosyl-N-formylglycinamide[c] + L-Glutamine[c] + H2O[c] => ADP[c] + Orthophosphate[c] + fpram[c] + L-Glutamate[c]	(SACE_7142) or (SACE_7143) or (SACE_7144)	SACE_7142,SACE_7143,SACE_7144		purine metabolism	0	0	1000	0	2	6.3.5.3
r491	phosphoribosylaminoimidazole synthetase	ATP[c] + fpram[c] => ADP[c] + Orthophosphate[c] + airt[c]	(SACE_7124 )	SACE_7124		purine metabolism	0	0	1000	0	2	6.3.3.1
r492	5-(carboxyamino)imidazole ribonucleotide synthase	ATP[c] + airt[c] + HCO3[c] => ADP[c] + Orthophosphate[c] + 5caiz[c]	(SACE_6486)	SACE_6486		purine metabolism	0	0	1000	0	2	6.3.4.18
r493	5-(carboxyamino)imidazole ribonucleotide mutase	5caiz[c] <=> 5aizc[c]	(SACE_6485)	SACE_6485		purine metabolism	1	-1000	1000	0	2	5.4.99.18
r494	phosphoribosylaminoimidazole-succinocarboxamide synthase	ATP[c] + 5aizc[c] + L-Aspartate[c] <=> ADP[c] + Orthophosphate[c] + 15aics[c]	(SACE_7150)	SACE_7150		purine metabolism	1	-1000	1000	0	2	6.3.2.6
r495	adenylosuccinate lyase	15aics[c] <=> Fumarate[c] + aicar[c]	(SACE_7153)	SACE_7153		purine metabolism	1	-1000	1000	0	2	4.3.2.2
r496	adenine phosphoribosyltransferase	aicar[c] + Diphosphate[c] <=> 5-Amino-4-imidazolecarboxyamide[c] + prpp[c]	(SACE_2027)	SACE_2027		purine metabolism	1	-1000	1000	0	2	2.4.2.7
r497	bifunctional phosphoribosylaminoimidazolecarboxamide formyltransferase/IMP cyclohydrolase	10fthf[c] + aicar[c] <=> Tetrahydrofolate[c] + fprica[c]	(SACE_6664)	SACE_6664		purine metabolism	1	-1000	1000	0	2	2.1.2.3 3.5.4.10
r498	bifunctional phosphoribosylaminoimidazolecarboxamide formyltransferase/IMP cyclohydrolase	fprica[c] <=> IMP[c] + H2O[c]	(SACE_6664)	SACE_6664		Purine metabolism	1	-1000	1000	0	2	2.1.2.3 3.5.4.10
r499	adenylosuccinate lyase	dcamp[c] => Fumarate[c] + AMP[c]	(SACE_7153)	SACE_7153		Purine metabolism	0	0	1000	0	2	4.3.2.2
r500	inositol-5-monophosphate dehydrogenase	IMP[c] + NAD[c] + H2O[c] => xmp[c] + NADH[c] + H[c]	(SACE_0914) or (SACE_6707) or (SACE_6708)	SACE_0914,SACE_6707,SACE_6708		Purine metabolism	0	0	1000	0	2	1.1.1.205
r501	bifunctional GMP synthase/glutamine amidotransferase protein	ATP[c] + xmp[c] + NH3[c] => AMP[c] + Diphosphate[c] + GMP[c]	(SACE_6701)	SACE_6701		Purine metabolism	0	0	1000	0	2	6.3.5.2
r502	bifunctional GMP synthase/glutamine amidotransferase protein	ATP[c] + xmp[c] + L-Glutamine[c] + H2O[c] => AMP[c] + Diphosphate[c] + GMP[c] + L-Glutamate[c]	(SACE_6701)	SACE_6701		Purine metabolism	0	0	1000	0	2	6.3.5.2
r503	guanylate kinase	ATP[c] + GMP[c] <=> ADP[c] + GDP[c]	(SACE_2100)	SACE_2100		Purine metabolism	1	-1000	1000	0	2	2.7.4.8
r504	nucleoside diphosphate kinase	ATP[c] + GDP[c] <=> ADP[c] + GTP[c]	(SACE_1401)	SACE_1401		Purine metabolism	1	-1000	1000	0	2	2.7.4.6
r505	adenylate cyclase	GTP[c] => 35cgmp[c] + Diphosphate[c]	(SACE_1989) or (SACE_3984)	SACE_1989,SACE_3984		Purine metabolism	0	0	1000	0	2	4.6.1.1
r506	Guanosine 3',5'-cyclic phosphate 5'-nucleotidohydrolase	35cgmp[c] + H2O[c] <=> GMP[c]				Purine metabolism	1	-1000	1000	0	2	3.1.4.17 3.1.4.35	reaction added for gap filling
r507	GTP pyrophosphokinase	ATP[c] + GTP[c] => AMP[c] + gdptp[c]	(SACE_2028)	SACE_2028		Purine metabolism	0	0	1000	0	2	2.7.6.5
r508	SACE_1948exopolyphosphatase	gdptp[c] + H2O[c] <=> ppgpp[c] + Orthophosphate[c]	(SACE_0843) or (SACE_6964) or (SACE_1948)	SACE_0843,SACE_6964,SACE_1948		Purine metabolism	1	-1000	1000	0	2	3.6.1.11 3.6.1.40
r509	guanosine-3',5'-bis(vdiphosphate) 3'-diphosphohydrolase	ppgpp[c] + H2O[c] => GDP[c] + Diphosphate[c]				Purine metabolism	0	0	1000	0	2	3.1.7.2	reaction added for gap filling
r510	SACE_0591ribonucleotide-diphosphate reductase subunit beta	Thioredoxin[c] + GDP[c] => dGDP[c] + trdds[c] + H2O[c]	(SACE_0591 and SACE_1282 and SACE_1283 and SACE_1764)	SACE_0591,SACE_1282,SACE_1283,SACE_1764		Purine metabolism	0	0	1000	0	2	1.17.4.1
r511	nucleoside diphosphate kinase	ATP[c] + dGDP[c] <=> ADP[c] + dGTP[c]	(SACE_1401)	SACE_1401		Purine metabolism	1	-1000	1000	0	2	2.7.4.6
r512	guanylate kinase	ATP[c] + dGMP[c] <=> ADP[c] + dGDP[c]	(SACE_2100)	SACE_2100		Purine metabolism	1	-1000	1000	0	2	2.7.4.8
r513	SACE_47205'-nucleotidase-like protein	dGMP[c] + H2O[c] <=> Deoxyguanosine[c] + Orthophosphate[c]	(SACE_4720)	SACE_4720		Purine metabolism	1	-1000	1000	0	2	3.1.3.5
r514	deoxyguanosinetriphosphate triphosphohydrolase-like protein	dGTP[c] + H2O[c] => Deoxyguanosine[c] + Triphosphate[c]	(SACE_1502) or (SACE_2185)	SACE_1502,SACE_2185		Purine metabolism	0	0	1000	0	2	3.1.5.1
r515	purine nucleoside phosphorylase	Deoxyguanosine[c] + Orthophosphate[c] <=> Guanine[c] + 2dr1p[c]	(SACE_6547)	SACE_6547		Purine metabolism	1	-1000	1000	0	2	2.4.2.1
r516	SACE_47205'-nucleotidase-like protein	GMP[c] + H2O[c] => Guanosine[c] + Orthophosphate[c]	(SACE_4720)	SACE_4720		Purine metabolism	0	0	1000	0	2	3.1.3.5
r517	purine nucleoside phosphorylase	Guanosine[c] + Orthophosphate[c] <=> Guanine[c] + r1p[c]	(SACE_6547)	SACE_6547		Purine metabolism	1	-1000	1000	0	2	2.4.2.1
r518	SACE_0339inosine-uridine preferring nucleoside hydrolase	Guanosine[c] + H2O[c] => Guanine[c] + D-Ribose[c]	(SACE_0339) or (SACE_1231) or (SACE_3233)	SACE_0339,SACE_1231,SACE_3233		Purine metabolism	0	0	1000	0	2	3.2.2.1
r519	hypoxanthine-guanine phosphoribosyltransferase	GMP[c] + Diphosphate[c] <=> Guanine[c] + prpp[c]	(SACE_0395) or (SACE_2027)	SACE_0395,SACE_2027		Purine metabolism	1	-1000	1000	0	2	2.4.2.8 2.4.2.7
r520	guanine deaminase	Guanine[c] + H2O[c] <=> Xanthine[c] + NH3[c]	(SACE_1260) or (SACE_6093)	SACE_1260,SACE_6093		Purine metabolism	1	-1000	1000	0	2	3.5.4.3
r521	SACE_0834MazG transcriptional regulator	XTP[c] + H2O[c] => xmp[c] + Diphosphate[c]	(SACE_0834) or (SACE_1213)	SACE_0834,SACE_1213	SACE_0834 SACE_1213	Purine metabolism	0	0	1000	0	2	3.6.1.66
r522	SACE_47205'-nucleotidase-like protein	xmp[c] + H2O[c] => Xanthosine[c] + Orthophosphate[c]	(SACE_4720)	SACE_4720		Purine metabolism	0	0	1000	0	2	3.1.3.5
r523	SACE_0339inosine-uridine preferring nucleoside hydrolase	Xanthosine[c] + H2O[c] => Xanthine[c] + D-Ribose[c]	(SACE_0339) or (SACE_3233)	SACE_0339,SACE_3233		Purine metabolism	0	0	1000	0	2	3.2.2.1
r524	purine nucleoside phosphorylase	Xanthosine[c] + Orthophosphate[c] <=> Xanthine[c] + r1p[c]	(SACE_6547)	SACE_6547		Purine metabolism	1	-1000	1000	0	2	2.4.2.1
r525	hypoxanthine-guanine phosphoribosyltransferase	Xanthine[c] + prpp[c] => xmp[c] + Diphosphate[c]	(SACE_0395)	SACE_0395		Purine metabolism	0	0	1000	0	2	2.4.2.8
r526	xanthine dehydrogenase FAD-binding subunit	Xanthine[c] + NAD[c] + H2O[c] <=> Urate[c] + NADH[c] + H[c]	(SACE_3091 and SACE_3092 and SACE_3093 and SACE_4466 and SACE_4467 and SACE_4468 and SACE_4618 and SACE_4619) or (SACE_0537 and SACE_1261 and SACE_3092 and SACE_4467 and SACE_4468 and SACE_4618 and SACE_4872)	SACE_3091,SACE_3092,SACE_3093,SACE_4466,SACE_4467,SACE_4468,SACE_4618,SACE_4619,SACE_0537,SACE_1261,SACE_3092,SACE_4467,SACE_4468,SACE_4618,SACE_4872		Purine metabolism	1	-1000	1000	0	2	1.17.1.4
r527	SACE_6736urate oxidase	Urate[c] + O2[c] + H2O[c] => 5-Hydroxyisourate[c] + H2O2[c]	(SACE_6736)	SACE_6736		Purine metabolism	0	0	1000	0	2	1.7.3.3
r528	5-hydroxyisourate amidohydrolase	5-Hydroxyisourate[c] + H2O[c] => 5houdic[c]	(SACE_6735)	SACE_6735		Purine metabolism	0	0	1000	0	2	3.5.2.17	reaction added for xanthine utilization
r529	2-oxo-4-hydroxy-4-carboxy-5-ureidoimidazoline decarboxylase	5houdic[c] => alltn[c] + CO2[c]	(SACE_6734)	SACE_6734		Purine metabolism	0	0	1000	0	2	4.1.1.97	reaction added for xanthine utilization
r530	SACE_6727allantoinase	alltn[c] + H2O[c] <=> Allantoate[c]	(SACE_6727)	SACE_6727		Purine metabolism	1	-1000	1000	0	2	3.5.2.5
r531	SACE_6734putative allantoicase (allantoate amidinohydrolase) (partial match)	Allantoate[c] + H2O[c] <=> urdglyc[c] + Urea[c]	(SACE_6734)	SACE_6734		Purine metabolism	1	-1000	1000	0	2	3.5.3.4
r532	SACE_47205'-nucleotidase-like protein	IMP[c] + H2O[c] => Inosine[c] + Orthophosphate[c]	(SACE_4720)	SACE_4720		Purine metabolism	0	0	1000	0	2	3.1.3.5
r533	SACE_0339inosine-uridine preferring nucleoside hydrolase	Inosine[c] + H2O[c] => Hypoxanthine[c] + D-Ribose[c]	(SACE_0339) or (SACE_1231) or (SACE_3233)	SACE_0339,SACE_1231,SACE_3233		Purine metabolism	0	0	1000	0	2	3.2.2.1
r534	hypoxanthine-guanine phosphoribosyltransferase	Hypoxanthine[c] + prpp[c] => IMP[c] + Diphosphate[c]	(SACE_0395)	SACE_0395		Purine metabolism	0	0	1000	0	2	2.4.2.8
r535	purine nucleoside phosphorylase	Inosine[c] + Orthophosphate[c] <=> Hypoxanthine[c] + r1p[c]	(SACE_6547)	SACE_6547		Purine metabolism	1	-1000	1000	0	2	2.4.2.1
r536	xanthine dehydrogenase FAD-binding subunit	Hypoxanthine[c] + NAD[c] + H2O[c] <=> Xanthine[c] + NADH[c] + H[c]	(SACE_3091 and SACE_3092 and SACE_3093 and SACE_4466 and SACE_4467 and SACE_4468 and SACE_4618 and SACE_4619) or (SACE_0537 and SACE_1261 and SACE_3092 and SACE_4467 and SACE_4468 and SACE_4618 and SACE_4872)	SACE_3091,SACE_3092,SACE_3093,SACE_4466,SACE_4467,SACE_4468,SACE_4618,SACE_4619,SACE_0537,SACE_1261,SACE_3092,SACE_4467,SACE_4468,SACE_4618,SACE_4872		Purine metabolism	1	-1000	1000	0	2	1.17.1.4
r537	SACE_47205'-nucleotidase-like protein	AMP[c] + H2O[c] => Adenosine[c] + Orthophosphate[c]	(SACE_4720)	SACE_4720		Purine metabolism	0	0	1000	0	2	3.1.3.5
r538	adenosine kinase	ATP[c] + Adenosine[c] => ADP[c] + AMP[c]	(SACE_1656) or (SACE_3899)	SACE_1656,SACE_3899		Purine metabolism	0	0	1000	0	2	2.7.1.20
r539	adenosine deaminase	Adenosine[c] + H2O[c] => Inosine[c] + NH3[c]	(SACE_1513) or (SACE_2180) or (SACE_3230) or (SACE_3612) or (SACE_6573)	SACE_1513,SACE_2180,SACE_3230,SACE_3612,SACE_6573		Purine metabolism	0	0	1000	0	2	3.5.4.4
r540	purine nucleoside phosphorylase	Adenosine[c] + Orthophosphate[c] <=> Adenine[c] + r1p[c]	(SACE_6547)	SACE_6547		Purine metabolism	1	-1000	1000	0	2	2.4.2.1
r541	SACE_0339inosine-uridine preferring nucleoside hydrolase	Adenosine[c] + H2O[c] => Adenine[c] + D-Ribose[c]	(SACE_0339) or (SACE_1231) or (SACE_3233)	SACE_0339,SACE_1231,SACE_3233		Purine metabolism	0	0	1000	0	2	3.2.2.1
r542	adenine phosphoribosyltransferase	Adenine[c] + prpp[c] => AMP[c] + Diphosphate[c]	(SACE_2027)	SACE_2027		Purine metabolism	0	0	1000	0	2	2.4.2.7
r543	adenylate kinase	ATP[c] + AMP[c] <=> 2 ADP[c]	(SACE_2376) or (SACE_6812)	SACE_2376,SACE_6812		Purine metabolism	1	-1000	1000	0	2	2.7.4.3
r544	purine nucleoside phosphorylase	Deoxyadenosine[c] + Orthophosphate[c] <=> Adenine[c] + 2dr1p[c]	(SACE_6547)	SACE_6547		Purine metabolism	1	-1000	1000	0	2	2.4.2.1
r545	SACE_0591ribonucleotide-diphosphate reductase subunit beta	Thioredoxin[c] + ADP[c] => dADP[c] + trdds[c] + H2O[c]	(SACE_0591 and SACE_1282 and SACE_1283 and SACE_1764)	SACE_0591,SACE_1282,SACE_1283,SACE_1764		Purine metabolism	0	0	1000	0	2	1.17.4.1
r546	adenylate kinase	ADP[c] + dADP[c] <=> ATP[c] + dAMP[c]	(SACE_2376) or (SACE_6812)	SACE_2376,SACE_6812		Purine metabolism	1	-1000	1000	0	2	2.7.4.3
r547	SACE_47205'-nucleotidase-like protein	dAMP[c] + H2O[c] <=> Deoxyadenosine[c] + Orthophosphate[c]	(SACE_4720)	SACE_4720		Purine metabolism	1	-1000	1000	0	2	3.1.3.5
r548	adenosine deaminase	Deoxyadenosine[c] + H2O[c] => Deoxyinosine[c] + NH3[c]	(SACE_1513) or (SACE_2180) or (SACE_3230) or (SACE_3612) or (SACE_6573)	SACE_1513,SACE_2180,SACE_3230,SACE_3612,SACE_6573		Purine metabolism	0	0	1000	0	2	3.5.4.4
r549	purine nucleoside phosphorylase	Deoxyinosine[c] + Orthophosphate[c] => Hypoxanthine[c] + 2dr1p[c]	(SACE_6547)	SACE_6547		Purine metabolism	0	0	1000	0	2	2.4.2.1
r550	nucleoside diphosphate kinase	ATP[c] + ADP[c] <=> ADP[c] + ATP[c]	(SACE_1401)	SACE_1401		Purine metabolism	0	0	0	0	2	2.7.4.6
r551	SACE_0834MazG transcriptional regulator	GTP[c] + H2O[c] => GMP[c] + Diphosphate[c]	(SACE_0834)	SACE_0834		Purine metabolism	0	0	1000	0	2	3.6.1.9
r552	SACE_0834MazG transcriptional regulator	dGTP[c] + H2O[c] => dGMP[c] + Diphosphate[c]	(SACE_0834)	SACE_0834		Purine metabolism	0	0	1000	0	2	3.6.1.19
r553	phosphoribosylaminoimidazole carboxylase catalytic subunit	5aizc[c] => airt[c] + CO2[c]	(SACE_6485 and SACE_6486)	SACE_6485,SACE_6486		Purine metabolism	0	0	1000	0	2	4.1.1.21
r554	putative 2-hydroxyhepta-2,4-diene-1,7-dioate isomerase	5aizc[c] => 5-Aminoimidazole[c] + CO2[c]	(SACE_1233) or (SACE_3828) or (SACE_3938) or (SACE_6202)	SACE_1233,SACE_3828,SACE_3938,SACE_6202		Purine metabolism	0	0	1000	0	2	4.1.1.- 5.3.3.-
r555	nucleoside diphosphate kinase	ATP[c] + UDP[c] <=> ADP[c] + UTP[c]	(SACE_1401)	SACE_1401		Pyrimidine metabolism	1	-1000	1000	0	2	2.7.4.6
r556	nucleoside diphosphate kinase	ATP[c] + CDP[c] <=> ADP[c] + CTP[c]	(SACE_1401)	SACE_1401		Pyrimidine metabolism	1	-1000	1000	0	2	2.7.4.6
r557	nucleoside diphosphate kinase	ATP[c] + IDP[c] <=> ADP[c] + ITP[c]	(SACE_1401)	SACE_1401		Pyrimidine metabolism	1	-1000	1000	0	2	2.7.4.6
r558	nucleoside diphosphate kinase	ATP[c] + dTDP[c] <=> ADP[c] + dTTP[c]	(SACE_1401)	SACE_1401		Pyrimidine metabolism	1	-1000	1000	0	2	2.7.4.6
r559	nucleoside diphosphate kinase	ATP[c] + dCDP[c] <=> ADP[c] + dCTP[c]	(SACE_1401)	SACE_1401		Pyrimidine metabolism	1	-1000	1000	0	2	2.7.4.6
r560	nucleoside diphosphate kinase	ATP[c] + dUDP[c] <=> ADP[c] + dUTP[c]	(SACE_1401)	SACE_1401		Pyrimidine metabolism	1	-1000	1000	0	2	2.7.4.6
r561	nucleoside diphosphate kinase	ATP[c] + dIDP[c] <=> ADP[c] + dITP[c]	(SACE_1401)	SACE_1401		Pyrimidine metabolism	1	-1000	1000	0	2	2.7.4.6
r562	SACE_0834MazG transcriptional regulator	dITP[c] + H2O[c] <=> dIMP[c] + Diphosphate[c]	(SACE_0834) or (SACE_1213)	SACE_0834,SACE_1213		Pyrimidine metabolism	1	-1000	1000	0	2	3.6.1.19
r563	nucleoside diphosphate kinase	ATP[c] + dADP[c] <=> ADP[c] + dATP[c]	(SACE_1401)	SACE_1401		Pyrimidine metabolism	1	-1000	1000	0	2	2.7.4.6
r564	adenylate cyclase	ATP[c] => 35camp[c] + Diphosphate[c]	(SACE_1989) or (SACE_3984)	SACE_1989,SACE_3984		Pyrimidine metabolism	0	0	1000	0	2	4.6.1.1
r565	adenosine 3',5'-phosphate 5'-nucleotidohydrolase	35camp[c] + H2O[c] => AMP[c]				Pyrimidine metabolism	0	0	1000	0	2	3.1.4.17 3.1.4.53	reaction added for gap filling
r566	SACE_0834MazG transcriptional regulator	ITP[c] + H2O[c] => IMP[c] + Diphosphate[c]	(SACE_0834)	SACE_0834		Pyrimidine metabolism	0	0	1000	0	2	3.6.1.19
r567	dihydroorotase	cbasp[c] => (S)-Dihydroorotate[c] + H2O[c]	(SACE_2080)	SACE_2080		Pyrimidine metabolism	1	-1000	1000	0	2	3.5.2.3
r568	dihydroorotate dehydrogenase	(S)-Dihydroorotate[c] + O2[c] <=> Orotate[c] + H2O2[c]	(SACE_2136)	SACE_2136		Pyrimidine metabolism	1	-1000	1000	0	2	1.3.1.14
r569	orotate phosphoribosyltransferase	Orotate[c] + prpp[c] <=> orot5p[c] + Diphosphate[c]	(SACE_3691) or (SACE_7189)	SACE_3691,SACE_7189		Pyrimidine metabolism	1	-1000	1000	0	2	2.4.2.10
r570	orotidine-5prime-phosphate decarboxylase	orot5p[c] => UMP[c] + CO2[c]	(SACE_2084)	SACE_2084		Pyrimidine metabolism	0	0	1000	0	2	4.1.1.23
r571	cytidylate kinase	ATP[c] + UMP[c] <=> ADP[c] + UDP[c]	(SACE_5234)	SACE_5234		Pyrimidine metabolism	1	-1000	1000	0	2	2.7.4.14 2.7.4.22
r572	SACE_47205'-nucleotidase-like protein	UMP[c] + H2O[c] => Uridine[c] + Orthophosphate[c]	(SACE_4720)	SACE_4720		Pyrimidine metabolism	0	0	1000	0	2	3.1.3.5
r573	SACE_1035uridine kinase	ATP[c] + Uridine[c] => ADP[c] + UMP[c]	(SACE_1035)	SACE_1035		Pyrimidine metabolism	0	0	1000	0	2	2.7.1.48
r574	SACE_1035uridine kinase	GTP[c] + Uridine[c] => GDP[c] + UMP[c]	(SACE_1035)	SACE_1035		Pyrimidine metabolism	0	0	1000	0	2	2.7.1.48
r575	SACE_1035uridine kinase	ITP[c] + Uridine[c] => IDP[c] + UMP[c]	(SACE_1035)	SACE_1035		Pyrimidine metabolism	0	0	1000	0	2	2.7.1.48
r576	SACE_1035uridine kinase	UTP[c] + Uridine[c] => UDP[c] + UMP[c]	(SACE_1035)	SACE_1035		Pyrimidine metabolism	0	0	1000	0	2	2.7.1.48
r577	SACE_1035uridine kinase	dATP[c] + Uridine[c] => dADP[c] + UMP[c]	(SACE_1035)	SACE_1035		Pyrimidine metabolism	0	0	1000	0	2	2.7.1.48
r578	SACE_1035uridine kinase	dGTP[c] + Uridine[c] => dGDP[c] + UMP[c]	(SACE_1035)	SACE_1035		Pyrimidine metabolism	0	0	1000	0	2	2.7.1.48
r579	SACE_1035uridine kinase	dTTP[c] + Uridine[c] => dTDP[c] + UMP[c]	(SACE_1035)	SACE_1035		Pyrimidine metabolism	0	0	1000	0	2	2.7.1.48
r580	SACE_1035uridine kinase	dCTP[c] + Uridine[c] => dCDP[c] + UMP[c]	(SACE_1035)	SACE_1035		Pyrimidine metabolism	0	0	1000	0	2	2.7.1.48
r581	SACE_1035uridine kinase	dUTP[c] + Uridine[c] => dUDP[c] + UMP[c]	(SACE_1035)	SACE_1035		Pyrimidine metabolism	0	0	1000	0	2	2.7.1.48
r582	SACE_2078pyrimidine operon attenuation protein / uracil phosphoribosyltransferase	UMP[c] + Diphosphate[c] <=> Uracil[c] + prpp[c]	(SACE_2078) or (SACE_6559)	SACE_2078,SACE_6559		Pyrimidine metabolism	1	-1000	1000	0	2	2.4.2.9
r583	CTP synthetase	ATP[c] + UTP[c] + NH3[c] => ADP[c] + Orthophosphate[c] + CTP[c]	(SACE_5244)	SACE_5244		Pyrimidine metabolism	0	0	1000	0	2	6.3.4.2
r584	CTP synthetase	ATP[c] + UTP[c] + L-Glutamine[c] + H2O[c] => ADP[c] + Orthophosphate[c] + CTP[c] + L-Glutamate[c]	(SACE_5244)	SACE_5244		Pyrimidine metabolism	0	0	1000	0	2	6.3.4.2
r585	deoxycytidine triphosphate deaminase	CTP[c] + H2O[c] => UTP[c] + NH3[c]	(SACE_7224)	SACE_7224		Pyrimidine metabolism	0	0	1000	0	2	3.5.4.13
r586	cytidylate kinase	ADP[c] + CDP[c] <=> ATP[c] + CMP[c]	(SACE_5234)	SACE_5234		Pyrimidine metabolism	1	-1000	1000	0	2	2.7.4.14
r587	SACE_47205'-nucleotidase-like protein	CMP[c] + H2O[c] => Cytidine[c] + Orthophosphate[c]	(SACE_4720)	SACE_4720		Pyrimidine metabolism	0	0	1000	0	2	3.1.3.5
r588	SACE_1035uridine kinase	ATP[c] + Cytidine[c] => ADP[c] + CMP[c]	(SACE_1035)	SACE_1035		Pyrimidine metabolism	0	0	1000	0	2	2.7.1.48
r589	SACE_1035uridine kinase	UTP[c] + Cytidine[c] => UDP[c] + CMP[c]	(SACE_1035)	SACE_1035		Pyrimidine metabolism	0	0	1000	0	2	2.7.1.48
r590	SACE_1035uridine kinase	GTP[c] + Cytidine[c] => GDP[c] + CMP[c]	(SACE_1035)	SACE_1035		Pyrimidine metabolism	0	0	1000	0	2	2.7.1.48
r591	SACE_1035uridine kinase	ITP[c] + Cytidine[c] => IDP[c] + CMP[c]	(SACE_1035)	SACE_1035		Pyrimidine metabolism	0	0	1000	0	2	2.7.1.48
r592	SACE_1035uridine kinase	dATP[c] + Cytidine[c] => dADP[c] + CMP[c]	(SACE_1035)	SACE_1035		Pyrimidine metabolism	0	0	1000	0	2	2.7.1.48
r593	SACE_1035uridine kinase	dGTP[c] + Cytidine[c] => dGDP[c] + CMP[c]	(SACE_1035)	SACE_1035		Pyrimidine metabolism	0	0	1000	0	2	2.7.1.48
r594	SACE_1035uridine kinase	dTTP[c] + Cytidine[c] => dTDP[c] + CMP[c]	(SACE_1035)	SACE_1035		Pyrimidine metabolism	0	0	1000	0	2	2.7.1.48
r595	SACE_1035uridine kinase	dCTP[c] + Cytidine[c] => dCDP[c] + CMP[c]	(SACE_1035)	SACE_1035		Pyrimidine metabolism	0	0	1000	0	2	2.7.1.48
r596	SACE_1035uridine kinase	dUTP[c] + Cytidine[c] => dUDP[c] + CMP[c]	(SACE_1035)	SACE_1035		Pyrimidine metabolism	0	0	1000	0	2	2.7.1.48
r597	cytidine deaminase	Cytidine[c] + H2O[c] => Uridine[c] + NH3[c]	(SACE_6576)	SACE_6576		Pyrimidine metabolism	0	0	1000	0	2	3.5.4.5
r598	SACE_0233CMP/dCMP deaminase, zinc-binding	Cytosine[c] + H2O[c] => Uracil[c] + NH3[c]	(SACE_0233) or (SACE_2115) or (SACE_5196)	SACE_0233,SACE_2115,SACE_5196		Pyrimidine metabolism	0	0	1000	0	2	3.5.4.1
r599	dihydropyrimidinase	5,6-Dihydrouracil[c] + H2O[c] <=> 3-Ureidopropionate[c]	(SACE_3419)	SACE_3419		Pyrimidine metabolism	1	-1000	1000	0	2	3.5.2.2
r600	beta-ureidopropionase	3-Ureidopropionate[c] + H2O[c] <=> beta-Alanine[c] + CO2[c] + NH3[c]	(SACE_3417) or (SACE_6405)	SACE_3417,SACE_6405		Pyrimidine metabolism	0	0	1000	0	2	3.5.1.6
r601	SACE_0284thioredoxin-disulfide reductase	trdds[c] + NADPH[c] + H[c] => Thioredoxin[c] + NADP[c]	(SACE_0284) or (SACE_0932) or (SACE_3636) or (SACE_6311) or (SACE_7076) or (SACE_7384)	SACE_0284,SACE_0932,SACE_3636,SACE_6311,SACE_7076,SACE_7384		Pyrimidine metabolism	0	0	1000	0	2	1.8.1.9
r602	SACE_0591ribonucleotide-diphosphate reductase subunit beta	Thioredoxin[c] + CDP[c] => dCDP[c] + trdds[c] + H2O[c]	(SACE_0591 and SACE_1282 and SACE_1283 and SACE_1764)	SACE_0591,SACE_1282,SACE_1283,SACE_1764		Pyrimidine metabolism	0	0	1000	0	2	1.17.4.1
r603	deoxycytidine triphosphate deaminase	dCTP[c] + H2O[c] => dUTP[c] + NH3[c]	(SACE_7224)	SACE_7224		Pyrimidine metabolism	0	0	1000	0	2	3.5.4.13
r604	SACE_0591ribonucleotide-diphosphate reductase subunit beta	Thioredoxin[c] + UDP[c] => dUDP[c] + trdds[c] + H2O[c]	(SACE_0591 and SACE_1282 and SACE_1283 and SACE_1764)	SACE_0591,SACE_1282,SACE_1283,SACE_1764		Pyrimidine metabolism	0	0	1000	0	2	1.17.4.1
r605	thymidylate kinase	ADP[c] + dUDP[c] <=> ATP[c] + dUMP[c]	(SACE_6448)	SACE_6448		Pyrimidine metabolism	1	-1000	1000	0	2	2.7.4.9
r606	ATP:deoxyuridine 5'-phosphotransferase	ADP[c] + dUMP[c] <=> ATP[c] + Deoxyuridine[c]	(SACE_4720)	SACE_4720		Pyrimidine metabolism	1	-1000	1000	0	2	3.1.3.5	reaction added for dUMP biosynthesis
r607	purine nucleoside phosphorylase	Deoxyuridine[c] + Orthophosphate[c] => Uracil[c] + 2dr1p[c]	(SACE_6547) or (SACE_6575)	SACE_6547,SACE_6575		Pyrimidine metabolism	0	0	1000	0	2	2.4.2.1 2.4.2.4
r608	FAD-dependent thymidylate synthase	mlthf[c] + dUMP[c] + FADH2[c] => Tetrahydrofolate[c] + dTMP[c] + FAD[c]	(SACE_5902)	SACE_5902		Pyrimidine metabolism	0	0	1000	0	2	2.1.1.148
r609	thymidylate kinase	ATP[c] + dTMP[c] <=> ADP[c] + dTDP[c]	(SACE_6448)	SACE_6448		Pyrimidine metabolism	1	-1000	1000	0	2	2.7.4.9
r610	SACE_47205'-nucleotidase-like protein	dTMP[c] + H2O[c] <=> Thymidine[c] + Orthophosphate[c]	(SACE_4720)	SACE_4720		Pyrimidine metabolism	1	-1000	1000	0	2	3.1.3.5
r611	thymidine phosphorylase	Thymidine[c] + Orthophosphate[c] <=> Thymine[c] + 2dr1p[c]	(SACE_6575)	SACE_6575		Pyrimidine metabolism	1	-1000	1000	0	2	2.4.2.4
r612	SACE_0233CMP/dCMP deaminase, zinc-binding	5-Methylcytosine[c] + H2O[c] => Thymine[c] + NH3[c]	(SACE_0233) or (SACE_2115) or (SACE_5196)	SACE_0233,SACE_2115,SACE_5196		Pyrimidine metabolism	0	0	1000	0	2	3.5.4.1
r613	cytidylate kinase	ATP[c] + dCMP[c] <=> ADP[c] + dCDP[c]	(SACE_5234)	SACE_5234		Pyrimidine metabolism	1	-1000	1000	0	2	2.7.4.14
r614	SACE_47205'-nucleotidase-like protein	dCMP[c] + H2O[c] <=> Deoxycytidine[c] + Orthophosphate[c]	(SACE_4720)	SACE_4720		Pyrimidine metabolism	1	-1000	1000	0	2	3.1.3.5
r615	cytidine deaminase	Deoxycytidine[c] + H2O[c] => Deoxyuridine[c] + NH3[c]	(SACE_6576)	SACE_6576		Pyrimidine metabolism	0	0	1000	0	2	3.5.4.5
r616	SACE_0834MazG transcriptional regulator	dUTP[c] + H2O[c] => dUMP[c] + Diphosphate[c]	(SACE_0834)	SACE_0834		Pyrimidine metabolism	0	0	1000	0	2	3.6.1.9
r617	dihydropyrimidinase	5,6-Dihydrothymine[c] + H2O[c] => 3-Ureidoisobutyrate[c]	(SACE_3419)	SACE_3419		Pyrimidine metabolism	0	0	1000	0	2	3.5.2.2
r618	SACE_1330alpha-glucosidase	Sucrose[c] + H2O[c] <=> D-Fructose[c] + alpha-D-Glucose[c]	(SACE_1330) or (SACE_1668) or (SACE_3274) or (SACE_4257) or (SACE_5058) or (SACE_6260)	SACE_1330,SACE_1668,SACE_3274,SACE_4257,SACE_5058,SACE_6260		Starch and sucrose metabolism	1	-1000	1000	0	2	3.2.1.20
r619	SACE_6308glucan 1,4-alpha-glucosidase	2 Starch[c] + H2O[c] => alpha-D-Glucose[c] + Starch[c]	(SACE_6308) or (SACE_7136)	SACE_6308,SACE_7136		Starch and sucrose metabolism	0	0	1000	0	2	3.2.1.3
r620	secreted alpha-amylase	2 Starch[c] => Dextrin[c] + Starch[c]	(SACE_1658)	SACE_1658		Starch and sucrose metabolism	0	0	1000	0	2	3.2.1.1
r621	SACE_6308glucan 1,4-alpha-glucosidase	2 Dextrin[c] + H2O[c] => alpha-D-Glucose[c] + Dextrin[c]	(SACE_6308) or (SACE_7136)	SACE_6308,SACE_7136		Starch and sucrose metabolism	0	0	1000	0	2	3.2.1.3
r622	glycogen synthase	udpg[c]+ Amylose[c] => UDP[c] + 2 Amylose[c]	(SACE_6200)	SACE_6200		Starch and sucrose metabolism	0	0	1000	0	2	2.4.1.11
r623	1,4-alpha-glucan branching enzyme	Amylose[c] => Starch[c]	(SACE_6199)	SACE_6199		Starch and sucrose metabolism	0	0	1000	0	2	2.4.1.18
r624	trehalose-6-phosphate synthase	udpg[c] + alpha-g6p[c] => UDP[c] + tre6p[c]	(SACE_0462)	SACE_0462		Starch and sucrose metabolism	0	0	1000	0	2	2.4.1.15
r625	putative trehalose-6-phosphate phosphatase	tre6p[c] + H2O[c] => alpha,alpha-Trehalose[c] + Orthophosphate[c]	(SACE_3700)	SACE_3700		Starch and sucrose metabolism	0	0	1000	0	2	3.1.3.12
r626	Maltose alpha-D-glucosylmutase	alpha,alpha-Trehalose[c] <=> Maltose[c]				Starch and sucrose metabolism	0	0	1000	0	2	3.1.3.13	reaction added for gap filling
r627	alpha-glucosidase	Maltose[c] + H2O[c] <=> 2 alpha-D-Glucose[c]	(SACE_1330) or (SACE_1668) or (SACE_3274) or (SACE_4257) or (SACE_5058) or (SACE_6260)	SACE_1330,SACE_1668,SACE_3274,SACE_4257,SACE_5058,SACE_6260		Starch and sucrose metabolism	1	-1000	1000	0	2	3.2.1.20
r628	SACE_6216hypothetical protein	2 Starch[c] + Orthophosphate[c] => Starch[c] + g1p[c]	(SACE_6216)	SACE_6216		Starch and sucrose metabolism	0	0	1000	0	2	2.4.1.1
r629	alpha-D-glucose 1,6-phosphomutase	g1p[c] <=> alpha-g6p[c]				Starch and sucrose metabolism	1	-1000	1000	0	2	5.4.2.2
r630	6-phospho-beta-glucosidase	cellb6p[c] + H2O[c] => alpha-D-Glucose[c] + alpha-g6p[c]	(SACE_1589)	SACE_1589		Starch and sucrose metabolism	0	0	1000	0	2	3.2.1.86
r631	endoglucanase	2 Cellulose[c] + H2O[c] => Cellulose[c] + Cellodextrin[c] + H2O[c]	(SACE_4004) or (SACE_6060)	SACE_4004,SACE_6060		Starch and sucrose metabolism	0	0	1000	0	2	3.2.1.4
r632	endo-1,4-beta-glucanase; RBL03973	2 Cellodextrin[c] + H2O[c] => Cellobiose[c]	(SACE_4004) or (SACE_6060)	SACE_4004,SACE_6060		Starch and sucrose metabolism	0	0	1000	0	2	3.2.1.4
r633	beta-glucosidase	3 Cellodextrin[c] + 2 H2O[c] <=> alpha-D-Glucose[c] + Cellobiose[c]	(SACE_0732) or (SACE_1247) or (SACE_1284) or (SACE_4101) or (SACE_5452) or (SACE_6502)	SACE_0732,SACE_1247,SACE_1284,SACE_4101,SACE_5452,SACE_6502		Starch and sucrose metabolism	0	0	1000	0	2	3.2.1.21
r634	beta-D-glucosidase	Cellobiose[c] + H2O[c] => 2 alpha-D-Glucose[c]	(SACE_0732) or (SACE_1247) or (SACE_1284) or (SACE_4101) or (SACE_5452) or (SACE_6502)	SACE_0732,SACE_1247,SACE_1284,SACE_4101,SACE_5452,SACE_6502		Starch and sucrose metabolism	0	0	1000	0	2	3.2.1.21
r635	beta-D-glucosidase	beta-D-Glucoside[c] + H2O[c] => ROH[c] + alpha-D-Glucose[c]	(SACE_0732) or (SACE_1247) or (SACE_1284) or (SACE_4101) or (SACE_5452) or (SACE_6502)	SACE_0732,SACE_1247,SACE_1284,SACE_4101,SACE_5452,SACE_6502		Starch and sucrose metabolism	0	0	1000	0	2	3.2.1.21
r636	beta-D-glucosidase	Cellulose[c] + H2O[c] <=> Cellobiose[c]	(SACE_0732) or (SACE_1247) or (SACE_1284) or (SACE_4101) or (SACE_5452) or (SACE_6502)	SACE_0732,SACE_1247,SACE_1284,SACE_4101,SACE_5452,SACE_6502		Starch and sucrose metabolism	1	-1000	1000	0	2	3.2.1.91
r637	levanase	H2O[c] + Levan(m+n)[c] => Levan(m)[c] + Levan(n)[c]	(SACE_2277)	SACE_2277		Starch and sucrose metabolism	0	0	1000	0	2	3.2.1.65
r638	acetyl carboxylase	Acetyl-CoA[c] + cbtnCCP[c] => Malonyl-CoA[c] + Holo-carboxylase[c]	(SACE_0026 and SACE_0027 and SACE_0028 and SACE_3400 and SACE_3856 and SACE_6509 and SACE_7038)	SACE_0026,SACE_0027,SACE_0028,SACE_3400,SACE_3856,SACE_6509,SACE_7038		Propanoate metabolism	0	0	1000	0	2	6.4.1.2
r639	putative enoyl-CoA hydratase/isomerase family protein	Propenoyl-CoA[c] + H2O[c] <=> 3-Hydroxypropionyl-CoA[c]	(SACE_1028) or (SACE_1458) or (SACE_1464) or (SACE_2748) or (SACE_2794) or (SACE_3018) or (SACE_3084) or (SACE_3132) or (SACE_3450) or (SACE_3745) or (SACE_3868 ) or (SACE_3989) or (SACE_4015) or (SACE_4571) or (SACE_4787) or (SACE_5406) or (SACE_6207) or (SACE_6362)	SACE_1028,SACE_1458,SACE_1464,SACE_2748,SACE_2794,SACE_3018,SACE_3084,SACE_3132,SACE_3450,SACE_3745,SACE_3868 ,SACE_3989,SACE_4015,SACE_4571,SACE_4787,SACE_5406,SACE_6207,SACE_6362		Propanoate metabolism	1	-1000	1000	0	2	4.2.1.17
r640	SACE_3052medium-chain acyl-CoA ligase	3-Hydroxypropionyl-CoA[c] + Orthophosphate[c] + ADP[c] => 3-Hydroxypropanoate[c] + CoA[c] + ATP[c]	(SACE_3052) or (SACE_6372) or (SACE_6950)	SACE_3052,SACE_6372,SACE_6950		Propanoate metabolism	0	0	1000	0	2	3.1.2.4
r641	3-hydroxypropanoate:NAD oxidoreductase	3-Hydroxypropanoate[c] + NAD[c] => 3-Oxopropanoate[c] + NADH[c] + H[c]				Propanoate metabolism	0	0	1000	0	2	1.1.1.59	reaction added for gap filling
r642	putative acyl-CoA dehydrogenase	FADH2[c] + Propenoyl-CoA[c] <=> Propanoyl-CoA[c] + FAD[c]	(SACE_2743) or (SACE_2745) or (SACE_2758) or (SACE_2850) or (SACE_3126) or (SACE_3565) or (SACE_4125) or (SACE_5017) or (SACE_5025) or (SACE_5380) or (SACE_5699)	SACE_2743,SACE_2745,SACE_2758,SACE_2850,SACE_3126,SACE_3565,SACE_4125,SACE_5017,SACE_5025,SACE_5380,SACE_5699		Propanoate metabolism	1	-1000	1000	0	2	1.3.8.7
r643	putative acyl-CoA dehydrogenase	cytP450r(Electron-transferring)[c] + Propenoyl-CoA[c] <=> cytP450(Electron-transferring)[c] + Propanoyl-CoA[c]	(SACE_2743) or (SACE_2745) or (SACE_2758) or (SACE_2850) or (SACE_3126) or (SACE_3565) or (SACE_4125) or (SACE_5017) or (SACE_5025) or (SACE_5380) or (SACE_5699)	SACE_2743,SACE_2745,SACE_2758,SACE_2850,SACE_3126,SACE_3565,SACE_4125,SACE_5017,SACE_5025,SACE_5380,SACE_5699		Propanoate metabolism	1	-1000	1000	0	2	1.3.8.7
r644	acetyl-CoA synthetase	AMP[c] + Propanoyl-CoA[c] <=> Propionyladenylate[c] + CoA[c]	(SACE_0337) or (SACE_2375) or (SACE_2408) or (SACE_2851) or (SACE_3131) or (SACE_3902) or (SACE_4729)	SACE_0337,SACE_2375,SACE_2408,SACE_2851,SACE_3131,SACE_3902,SACE_4729		Propanoate metabolism	1	-1000	1000	0	2	6.2.1.1 6.2.1.17
r645	acetyl-CoA synthetase	Diphosphate[c] + Propionyladenylate[c] <=> ATP[c] + Propanoate[c]	(SACE_0337) or (SACE_2375) or (SACE_2408) or (SACE_2851) or (SACE_3131) or (SACE_3848) or (SACE_3902) or (SACE_4729)	SACE_0337,SACE_2375,SACE_2408,SACE_2851,SACE_3131,SACE_3848,SACE_3902,SACE_4729		Propanoate metabolism	1	-1000	1000	0	2	6.2.1.1 6.2.1.17
r646	acetate/propionate kinase	ATP[c] + Propanoate[c] <=> ADP[c] + ppap[c]	(SACE_1922)	SACE_1922		Propanoate metabolism	1	-1000	1000	0	2	2.7.2.1
r647	SACE_3418aminotransferase class III	beta-Alanine[c] + 2-Oxoglutarate[c] => 3-Oxopropanoate[c] + L-Glutamate[c]	(SACE_3418) or (SACE_3766) or (SACE_6022)	SACE_3418,SACE_3766,SACE_6022		Propanoate metabolism	0	0	1000	0	2	2.6.1.19
r648	methylmalonate-semialdehyde dehydrogenase (acylating)	3-Oxopropanoate[c] + CoA[c] + NAD[c] => Acetyl-CoA[c] + CO2[c] + NADH[c] + H[c]	(SACE_1456) or (SACE_4672) or (SACE_5185)	SACE_1456,SACE_4672,SACE_5185		Propanoate metabolism	0	0	1000	0	2	1.2.1.18 1.2.1.27
r649	methylmalonate-semialdehyde dehydrogenase (acylating)	3-Oxopropanoate[c] + CoA[c] + NADP[c] <=> Acetyl-CoA[c] + CO2[c] + NADPH[c] + H[c]	(SACE_1456) or (SACE_4672) or (SACE_5185)	SACE_1456,SACE_4672,SACE_5185		Propanoate metabolism	0	0	0	0	2	1.2.1.18
r650	acetoacetate decarboxylase	Acetoacetate[c] => Acetone[c] + CO2[c]	(SACE_5407)	SACE_5407		Propanoate metabolism	0	0	1000	0	2	4.1.1.4
r651	SACE_0343aldehyde dehydrogenase （NAD)	2-Propyn-1-al[c] + NAD[c] + H2O[c] <=> Propynoate[c] + NADH[c] + H[c]	(SACE_0343) or (SACE_1341) or (SACE_2377) or (SACE_2783) or (SACE_2915) or (SACE_3880) or (SACE_6014) or (SACE_6249) or (SACE_6565) or (SACE_6566)	SACE_0343,SACE_1341,SACE_2377,SACE_2783,SACE_2915,SACE_3880,SACE_6014,SACE_6249,SACE_6565,SACE_6566		Propanoate metabolism	1	-1000	1000	0	2	1.2.1.3
r652	quinoprotein ethanol dehydrogenase precursor	2-Propyn-1-ol[c] + PQQ[c] => 2-Propyn-1-al[c] + PQQH2[c]	(SACE_4449)	SACE_4449		Propanoate metabolism	0	0	1000	0	2	1.1.99.8
r653	SACE_1839putative maleate cis-trans isomerase	Fumarate[c] <=> male[c]	(SACE_1839 and SACE_4875)	SACE_1839,SACE_4875		Butanoate metabolism	1	-1000	1000	0	2	5.2.1.1
r654	(R)-Malate hydro-lyase	male[c] + H2O[c] <=> (R)-Malate[c]				Butanoate metabolism	1	-1000	1000	0	2	4.2.1.31	reaction added for gap filling
r655	NAD+ oxidoreductase (decarboxylating)	(R)-Malate[c] + NAD[c] => Pyruvate[c] + CO2[c] + NADH[c] + H[c]	(SACE_3495) or (SACE_4608)	SACE_3495,SACE_4608		Butanoate metabolism	0	0	1000	0	2	1.1.1.83
r656	SACE_3718D-beta-hydroxybutyrate dehydrogenase	(R)-3-Hydroxybutanoate[c] + NAD[c] <=> Acetoacetate[c] + NADH[c] + H[c]	(SACE_3718) or (SACE_6685)	SACE_3718,SACE_6685		Butanoate metabolism	1	-1000	1000	0	2	1.1.1.30
r657	SACE_1823fa oxidation complex alpha subunit	(S)-3-Hydroxybutanoyl-CoA[c] <=> (R)-3-Hydroxybutanoyl-CoA[c]	(SACE_1823 and SACE_6362)	SACE_1823,SACE_6362		Butanoate metabolism	1	-1000	1000	0	2	1.1.1.35 4.2.1.7 5.1.2.3 5.3.3.8
r658	3-oxoadipate:succinyl-CoA transferase, B subunit	Acetyl-CoA[c] + 2-Hydroxyglutarate[c] => Acetate[c] + 2-Hydroxyglutaryl-CoA[c]	(SACE_3515 and SACE_3516 and SACE_4007 and SACE_4008 and SACE_4876 and SACE_4877)	SACE_3515,SACE_3516,SACE_4007,SACE_4008,SACE_4876,SACE_4877		Butanoate metabolism	0	0	1000	0	2	2.8.3.12
r659	predicted aldose-1-epimerase	D-Galactose[c] => alpha-D-Galactose[c]	(SACE_0644) or (SACE_3904)	SACE_0644,SACE_3904		Butanoate metabolism	0	0	1000	0	2	5.1.3.3
r660	galactokinase	ATP[c] + alpha-D-Galactose[c] => ADP[c] + gal1p[c]	(SACE_1775)	SACE_1775		Butanoate metabolism	0	0	1000	0	2	2.7.1.6
r661	udpg:alpha-D-galactose-1-phosphate uridylyltransferase	udpg[c] + gal1p[c] <=> g1p[c] + udpgal[c]	(SACE_0764)	SACE_0764		Butanoate metabolism	1	-1000	1000	0	2	2.7.7.12	reaction added for aminosugar metabolism
r662	udpg 4-epimerase	udpg[c] <=> udpgal[c]	(SACE_1537) or (SACE_1774) or (SACE_3730) or (SACE_3915) or (SACE_5693) or (SACE_6956)	SACE_1537,SACE_1774,SACE_3730,SACE_3915,SACE_5693,SACE_6956		Butanoate metabolism	1	-1000	1000	0	2	5.1.3.2
r663	beta-galactosidase	Galactan[c] + H2O[c] => D-Galactose[c]	(SACE_0306) or (SACE_1940) or (SACE_5154) or (SACE_6726)	SACE_0306,SACE_1940,SACE_5154,SACE_6726		Butanoate metabolism	0	0	1000	0	2	3.2.1.23
r664	beta-galactosidase	Lactose[c] + H2O[c] => alpha-D-Glucose[c] + D-Galactose[c]	(SACE_0306) or (SACE_1940) or (SACE_5154) or (SACE_6726)	SACE_0306,SACE_1940,SACE_5154,SACE_6726		Butanoate metabolism	0	0	1000	0	2	3.2.1.23
r665	D-Galactose:oxygen 6-oxidoreductase	D-Galactose[c] + O2[c] + H2O[c] <=> D-Galactonate[c] + H2O2[c]				Butanoate metabolism	1	-1000	1000	0	2	1.1.3.9	reaction added for gap filling
r666	SACE_2636mandelate racemase/muconate lactonizing enzyme	D-Galactonate[c] => 2-Dehydro-3-deoxy-D-galactonate[c] + H2O[c]	(SACE_2636)	SACE_2636		Butanoate metabolism	0	0	1000	0	2	4.2.1.6
r667	2-dehydro-3-deoxygalactonate kinase	ATP[c] + 2-Dehydro-3-deoxy-D-galactonate[c] => ADP[c] + 2dh3dgal6p[c]	(SACE_2638)	SACE_2638		Butanoate metabolism	0	0	1000	0	2	2.7.1.58
r668	SACE_2637KDPG and KHG aldolase	2dh3dgal6p[c] => Pyruvate[c] + g3p_D[c]	(SACE_2637) or (SACE_4102)	SACE_2637,SACE_4102		Butanoate metabolism	0	0	1000	0	2	4.1.2.21
r669	putative alpha-galactosidase	Stachyose[c] + H2O[c] => Raffinose[c] + D-Galactose[c]	(SACE_3139) or (SACE_7065)	SACE_3139,SACE_7065		Butanoate metabolism	0	0	1000	0	2	3.2.1.22
r670	putative alpha-galactosidase	Raffinose[c] + H2O[c] => D-Galactose[c] + Sucrose[c]	(SACE_3139) or (SACE_7065)	SACE_3139,SACE_7065		Butanoate metabolism	0	0	1000	0	2	3.2.1.22
r671	putative alpha-galactosidase	6Dglu[c] + H2O[c] => D-Galactose[c] + Melibiose[c]	(SACE_3139) or (SACE_7065)	SACE_3139,SACE_7065		Butanoate metabolism	0	0	1000	0	2	3.2.1.22
r672	SACE_1330alpha-glucosidase	Melibiose[c] + H2O[c] => D-Galactose[c] + alpha-D-Glucose[c]	(SACE_1330) or (SACE_1668) or (SACE_3139) or (SACE_3274) or (SACE_4257) or (SACE_5058) or (SACE_6260) or (SACE_7065)	SACE_1330,SACE_1668,SACE_3139,SACE_3274,SACE_4257,SACE_5058,SACE_6260,SACE_7065		Butanoate metabolism	0	0	1000	0	2	3.2.1.20 3.2.1.22
r673	6-phosphofructokinase	ATP[c] + tag6p_D[c] <=> ADP[c] + tagdp_D[c]	(SACE_1704) or (SACE_6317)	SACE_1704,SACE_6317		Butanoate metabolism	1	-1000	1000	0	2	2.7.1.11 2.7.1.144
r674	6-phosphofructokinase	CTP[c] + tag6p_D[c] <=> CDP[c] + tagdp_D[c]	(SACE_1704)	SACE_1704		Butanoate metabolism	0	0	0	0	2	2.7.1.11
r675	6-phosphofructokinase	UTP[c] + tag6p_D[c] <=> UDP[c] + tagdp_D[c]	(SACE_1704)	SACE_1704		Butanoate metabolism	0	0	0	0	2	2.7.1.11
r676	6-phosphofructokinase	ITP[c] + tag6p_D[c] <=> IDP[c] + tagdp_D[c]	(SACE_1704)	SACE_1704		Butanoate metabolism	0	0	0	0	2	2.7.1.11
r677	putative alpha-galactosidase	glcglyc[c] + H2O[c] <=> D-Galactose[c] + Glycerol[c]	(SACE_3139) or (SACE_7065)	SACE_3139,SACE_7065		Butanoate metabolism	1	-1000	1000	0	2	3.2.1.22
r678	putative alpha-galactosidase	Epimelibiose[c] + H2O[c] <=> D-Mannose[c] + D-Galactose[c]	(SACE_3139) or (SACE_7065)	SACE_3139,SACE_7065		Butanoate metabolism	1	-1000	1000	0	2	3.2.1.22
r679	putative alpha-galactosidase	Melibiitol[c] + H2O[c] <=> D-Sorbitol[c] + D-Galactose[c]	(SACE_3139) or (SACE_7065)	SACE_3139,SACE_7065		Butanoate metabolism	1	-1000	1000	0	2	3.2.1.22
r680	putative alpha-galactosidase	alpha-D-Galactosyl-(1->3)-1D-inost[c] + H2O[c] <=> inost[c] + D-Galactose[c]	(SACE_3139) or (SACE_7065)	SACE_3139,SACE_7065		Butanoate metabolism	1	-1000	1000	0	2	3.2.1.22
r681	SACE_3985short-chain dehydrogenase/reductase SDR	(R)-Acetoin[c] + NAD[c] => Diacetyl[c] + NADH[c] + H[c]	(SACE_3985)	SACE_3985		Butanoate metabolism	0	0	1000	0	2	1.1.1.5
r682	SACE_3985short-chain dehydrogenase/reductase SDR	(R)-Acetoin[c] + NADP[c] => Diacetyl[c] + NADPH[c] + H[c]	(SACE_3985)	SACE_3985		Butanoate metabolism	0	0	1000	0	2	1.1.1.5
r683	SACE_2747short chain dehydrogenase/reductase family oxidoreductase	Butanal[c] + NADH[c] + H[c] => 1-Butanol[c] + NAD[c]	(SACE_2747) or (SACE_3080) or (SACE_4387) or (SACE_4696) or (SACE_5586) or (SACE_7048)	SACE_2747,SACE_3080,SACE_4387,SACE_4696,SACE_5586,SACE_7048		Butanoate metabolism	0	0	1000	0	2	1.1.1.-
r684	SACE_2747short chain dehydrogenase/reductase family oxidoreductase	Butanal[c] + NADPH[c] + H[c] => 1-Butanol[c] + NADP[c]	(SACE_2747) or (SACE_3080) or (SACE_4387) or (SACE_4696) or (SACE_5586) or (SACE_7048)	SACE_2747,SACE_3080,SACE_4387,SACE_4696,SACE_5586,SACE_7048		Butanoate metabolism	0	0	1000	0	2	1.1.1.-
r685	SACE_0343aldehyde dehydrogenase (NAD)	3-Butyn-1-al[c] + NAD[c] + H2O[c] <=> 3-Butynoate[c] + NADH[c] + H[c]	(SACE_0343) or (SACE_1341) or (SACE_2377) or (SACE_2783) or (SACE_2915) or (SACE_3880) or (SACE_6014) or (SACE_6249) or (SACE_6565) or (SACE_6566)	SACE_0343,SACE_1341,SACE_2377,SACE_2783,SACE_2915,SACE_3880,SACE_6014,SACE_6249,SACE_6565,SACE_6566		Butanoate metabolism	1	-1000	1000	0	2	1.2.1.3
r686	quinoprotein ethanol dehydrogenase precursor	3-Butyn-1-ol[c] + PQQ[c] => 3-Butyn-1-al[c] + PQQH2[c]	(SACE_4449)	SACE_4449		Butanoate metabolism	0	0	1000	0	2	1.1.99.8
r687	SACE_3449gluconolactonase precursor	L-Gulono-1,4-lactone[c] + H2O[c] <=> L-Gulonate[c]	(SACE_3449) or (SACE_3789)	SACE_3449,SACE_3789		Ascorbate and aldarate metabolism	1	-1000	1000	0	2	3.1.1.17
r688	SACE_0063FAD-linked oxidoreductase	L-Gulono-1,4-lactone[c] + O2[c] => L-xylo-Hexulonolactone[c] + H2O2[c]	(SACE_0063)	SACE_0063		Ascorbate and aldarate metabolism	0	0	1000	0	2	1.1.3.8
r689	SACE_0063FAD-linked oxidoreductase	L-xylo-Hexulonolactone[c] => Ascorbate[c]	(SACE_0063)	SACE_0063		Ascorbate and aldarate metabolism	0	0	1000	0	2	1.1.3.8
r690	SACE_0343aldehyde dehydrogenase （NAD)	D-Glucuronolactone[c] + NAD[c] + 2 H2O[c] <=> D-Glucarate[c] + NADH[c] + H[c]	(SACE_0343) or (SACE_1341) or (SACE_2377) or (SACE_2783) or (SACE_2915) or (SACE_3880) or (SACE_6014) or (SACE_6249) or (SACE_6565) or (SACE_6566)	SACE_0343,SACE_1341,SACE_2377,SACE_2783,SACE_2915,SACE_3880,SACE_6014,SACE_6249,SACE_6565,SACE_6566		Ascorbate and aldarate metabolism	1	-1000	1000	0	2	1.2.1.3
r691	SACE_0342mandelate racemase/muconate lactonizing enzyme	D-Glucarate[c] <=> 2-Dehydro-3-deoxy-D-glucarate[c] + H2O[c]	(SACE_0342) or (SACE_4841)	SACE_0342,SACE_4841		Ascorbate and aldarate metabolism	1	-1000	1000	0	2	4.2.1.40
r692	SACE_0342mandelate racemase/muconate lactonizing enzyme	D-Glucarate[c] <=> 5-Dehydro-4-deoxy-D-glucarate[c] + H2O[c]	(SACE_0342) or (SACE_4841)	SACE_0342,SACE_4841		Ascorbate and aldarate metabolism	1	-1000	1000	0	2	4.2.1.40
r693	SACE_5173D-galactarate dehydratase/altronate hydrolase-like	5-Dehydro-4-deoxy-D-glucarate[c] + H2O[c] => D-Galactarate[c]	(SACE_5173)	SACE_5173		Ascorbate and aldarate metabolism	1	-1000	1000	0	2	4.2.1.42
r694	5-dehydro-4-deoxyglucarate dehydratase	5-Dehydro-4-deoxy-D-glucarate[c] <=> 2,5-Dioxopentanoate[c] + H2O[c] + CO2[c]	(SACE_0344) or (SACE_1971)	SACE_0344,SACE_1971		Ascorbate and aldarate metabolism	1	-1000	1000	0	2	4.2.1.41
r695	SACE_3934oxidoreductase	L-Galactose[c] + NAD[c] => L-Galactono-1,4-lactone[c] + NADH[c] + H[c]	(SACE_3934)	SACE_3934		Ascorbate and aldarate metabolism	0	0	1000	0	2	1.1.1.122
r696	secreted chitinase	Chitin(a)[c] + H2O[c] => Chitobiose[c] + Chitin(b)[c]	(SACE_2232) or (SACE_3887) or (SACE_5287) or (SACE_6557) or (SACE_6558)	SACE_2232,SACE_3887,SACE_5287,SACE_6557,SACE_6558		Amino sugar and nucleotide sugar metabolism	0	0	1000	0	2	3.2.1.14
r697	secreted chitinase	Chitin(b)[c] + H2O[c] => acgam[c]	(SACE_2232) or (SACE_3887) or (SACE_5287) or (SACE_6557) or (SACE_6558)	SACE_2232,SACE_3887,SACE_5287,SACE_6557,SACE_6558		Amino sugar and nucleotide sugar metabolism	0	0	1000	0	2	3.2.1.14
r698	beta-N-acetylglucosaminidase (putative secreted protein)	Chitobiose[c] + H2O[c] => 2 acgam[c]	(SACE_0363) or (SACE_3851)	SACE_0363,SACE_3851		Amino sugar and nucleotide sugar metabolism	0	0	1000	0	2	3.2.1.52
r699	ATP:acgam 6-phosphotransferase	ATP[c] + acgam[c] => ADP[c] + N-Acetyl-gam6p[c]				Amino sugar and nucleotide sugar metabolism	0	0	1000	0	2	2.7.1.59	reaction added for gap filling
r700	SACE_2059PTS system, N-acetylglucosamine-specific IIBC subunit [SP:tr:A4FBE0_SACEN]	N(pi)hip(Protein)[c] + acgam[c] => his(Protein)[c] + N-Acetyl-gam6p[c]	(SACE_2059 and SACE_2061 and SACE_2062)	SACE_2059,SACE_2061,SACE_2062		Amino sugar and nucleotide sugar metabolism	0	0	1000	0	2	2.7.1.193
r701	N-acetylmuramic acid-6-phosphate etherase	acmum6p[c] + H2O[c] => N-Acetyl-gam6p[c] + (R)-Lactate[c]	(SACE_0352)	SACE_0352		Amino sugar and nucleotide sugar metabolism	0	0	1000	0	2	4.2.1.126
r702	putative N-acetylglucosamine-6-phosphate deacetylase	N-Acetyl-gam6p[c] + H2O[c] => gam6p[c] + Acetate[c]	(SACE_7184)	SACE_7184		Amino sugar and nucleotide sugar metabolism	0	0	1000	0	2	3.5.1.25
r703	putative phosphoglucomutase/phosphomannomutase	gam6p[c] <=> gam1p_A[c]	(SACE_6779)	SACE_6779		Amino sugar and nucleotide sugar metabolism	1	-1000	1000	0	2	5.4.2.10
r704	acgam 1-phosphate 1,6-phosphomutase	N-Acetyl-gam6p[c] <=> acgam1p[c]				Amino sugar and nucleotide sugar metabolism	1	-1000	1000	0	2	5.4.2.3	reaction added for aminosugar metabolism
r705	putative UDP-N-acetylglucosamine pyrophosphorylase	Acetyl-CoA[c] + gam1p_A[c] => CoA[c] + acgam1p[c]	(SACE_0817)	SACE_0817		Amino sugar and nucleotide sugar metabolism	0	0	1000	0	2	2.7.7.23 2.3.1.157
r706	putative UDP-N-acetylglucosamine pyrophosphorylase	UTP[c] + acgam1p[c] => Diphosphate[c] + uacgam[c]	(SACE_0817)	SACE_0817		Amino sugar and nucleotide sugar metabolism	0	0	1000	0	2	2.7.7.23 2.3.1.157
r707	UDP-N-acetylglucosamine 1-carboxyvinyltransferase	Phosphoenolpyruvate[c] + uacgam[c] => uaccg[c] + Orthophosphate[c]	(SACE_6270)	SACE_6270		Amino sugar and nucleotide sugar metabolism	0	0	1000	0	2	2.5.1.7
r708	UDP-N-acetylenolpyruvoylglucosamine reductase	uaccg[c] + NADH[c] + H[c] => UDP-N-acetylmuramate[c] + NAD[c]	(SACE_6978)	SACE_6978		Amino sugar and nucleotide sugar metabolism	0	0	1000	0	2	1.3.1.98
r709	UDP-N-acetylenolpyruvoylglucosamine reductase	uaccg[c] + NADPH[c] + H[c] => UDP-N-acetylmuramate[c] + NADP[c]	(SACE_6978)	SACE_6978		Amino sugar and nucleotide sugar metabolism	0	0	1000	0	2	1.3.1.98
r710	SACE_5690NAD-dependent epimerase/dehydratase	udpg[c] + HSO3[c] <=> UDP-6-sulfoquinovose[c] + H2O[c]	(SACE_5690)	SACE_5690		Amino sugar and nucleotide sugar metabolism	1	-1000	1000	0	2	3.13.1.1
r711	UDP-galactopyranose mutase	udpgal[c] <=> udpgalfur[c]	(SACE_0165)	SACE_0165		Amino sugar and nucleotide sugar metabolism	1	-1000	1000	0	2	5.4.99.9
r712	udpg 4-epimerase	dTDP-glucose[c] => dTDP-galactose[c]	(SACE_1537) or (SACE_1774) or (SACE_3345) or (SACE_3730) or (SACE_3915) or (SACE_5693) or (SACE_6956)	SACE_1537,SACE_1774,SACE_3345,SACE_3730,SACE_3915,SACE_5693,SACE_6956		Amino sugar and nucleotide sugar metabolism	0	0	1000	0	2	5.1.3.2
r713	dTDP-4-dehydrorhamnose reductase	GDP-4-dehydro-6-deoxy-L-mannose[c] + NADPH[c] + H[c] => GDP-6-deoxy-L-mannose[c] + NADP[c]	(SACE_6479)	SACE_6479		Amino sugar and nucleotide sugar metabolism	0	0	1000	0	2	1.1.1.133
r714	hydrolase or phosphatase	N-Acetyl-D-mannosamine[c] + Orthophosphate[c] => acmanap[c] + H2O[c]	(SACE_1848)	SACE_1848		Amino sugar and nucleotide sugar metabolism	0	0	1000	0	2	3.1.3.-
r715	putative inost-1(or 4)-monophosphatase	mi4p[c] + H2O[c] => inost[c] + Orthophosphate[c]	(SACE_1803) or (SACE_6907) or (SACE_6492)	SACE_1803,SACE_6907,SACE_6492		Inositol phosphate metabolism	0	0	1000	0	2	3.1.3.25
r716	SACE_2992putative inost phosphate synthase	alpha-g6p[c] => mi3p_D[c]	(SACE_2992) or (SACE_7359)	SACE_2992,SACE_7359		Inositol phosphate metabolism	0	0	1000	0	2	5.5.1.4
r717	putative inost-1(or 4)-monophosphatase	mi3p_D[c] + H2O[c] => inost[c] + Orthophosphate[c]	(SACE_1803) or (SACE_6907) or (SACE_6492)	SACE_1803,SACE_6907,SACE_6492		Inositol phosphate metabolism	0	0	1000	0	2	3.1.3.25
r718	non-hemolytic phospholipase C precursor	ptd1ino160[c] + H2O[c] => i1p[c] + 1,2-Diacyl-sn-glycerol[c]	(SACE_5775)	SACE_5775		Inositol phosphate metabolism	0	0	1000	0	2	3.1.4.3
r719	putative inost-1(or 4)-monophosphatase	i1p[c] + H2O[c] => inost[c] + Orthophosphate[c]	(SACE_1803) or (SACE_6907) or (SACE_6492)	SACE_1803,SACE_6907,SACE_6492		Inositol phosphate metabolism	0	0	1000	0	2	3.1.3.25
r720	inost 2-dehydrogenase	inost[c] + NAD[c] <=> 2,4,6/3,5-Pentahydroxycyclohexanone[c] + NADH[c] + H[c]	(SACE_2980) or (SACE_3276) or (SACE_4537) or (SACE_4657) or (SACE_5193)	SACE_2980,SACE_3276,SACE_4537,SACE_4657,SACE_5193		Inositol phosphate metabolism	1	-1000	1000	0	2	1.1.1.18
r721	SACE_3277xylose isomerase-like TIM barrel	2,4,6/3,5-Pentahydroxycyclohexanone[c] <=> 3D-(3,5/4)-Trihydroxycyclohexane-1,2-dione[c] + H2O[c]	(SACE_3277) or (SACE_4659) or (SACE_5192)	SACE_3277,SACE_4659,SACE_5192		Inositol phosphate metabolism	1	-1000	1000	0	2	4.2.1.44
r722	SACE_5186thiamine pyrophosphate-requiring enzyme	3D-(3,5/4)-Trihydroxycyclohexane-1,2-dione[c] + H2O[c] => 5dglucua[c]	(SACE_5186)	SACE_5186		Inositol phosphate metabolism	0	0	1000	0	2	3.7.1.22
r723	SACE_5187inost catabolism IolB protein	5dglucua[c] => d5kg[c]	(SACE_5187)	SACE_5187		Inositol phosphate metabolism	0	0	1000	0	2	5.3.1.30
r724	ribokinase family sugar kinase	d5kg[c] + ATP[c] => d5kgp[c] + ADP[c]	(SACE_5189)	SACE_5189		Inositol phosphate metabolism	0	0	1000	0	2	2.7.1.92
r725	d5kgp Dihydroxyacetone phosphate-lyase	d5kgp[c] <=> 3-Oxopropanoate[c] + dhap[c]				Inositol phosphate metabolism	1	-1000	1000	0	2	4.1.2.29	reaction added for inositol utilization
r726	SACE_7374phytase	minohp[c] + H2O[c] => mi123456p[c] + Orthophosphate[c]	(SACE_7374)	SACE_7374		Inositol phosphate metabolism	0	0	1000	0	2	3.1.3.8
r727	thiamine biosynthesis protein ThiC [SP:tr:A4F733_SACEN]	airt[c] => 4ampm[c]	(SACE_0511)	SACE_0511		Thiamine metabolism	0	0	1000	0	2	4.1.99.17
r728	phosphomethylpyrimidine kinase	ATP[c] + 4ampm[c] => ADP[c] + 2mahmp[c]	(SACE_0510) or (SACE_1297)	SACE_0510,SACE_1297		Thiamine metabolism	0	0	1000	0	2	2.7.4.7
r729	thiamine-phosphate pyrophosphorylase	2mahmp[c] + 4-Methyl-5-(2-phosphoethyl)-thiazole[c] => Diphosphate[c] + thmmp[c]	(SACE_0505)	SACE_0505		Thiamine metabolism	0	0	1000	0	2	2.5.1.3
r730	putative thiamine monophosphate kinase	ATP[c] + thmmp[c] => ADP[c] + thmpp[c]	(SACE_6127)	SACE_6127		Thiamine metabolism	0	0	1000	0	2	2.7.4.16
r731	SACE_1213Ham1-like protein	thmpp[c] + H2O[c] => thmmp[c] + Orthophosphate[c]	(SACE_1213)	SACE_1213		Thiamine metabolism	0	0	1000	0	2	3.6.1.15
r732	hydrolase or phosphatase	thmmp[c] + H2O[c] => Thiamin[c] + Orthophosphate[c]	(SACE_1848)	SACE_1848		Thiamine metabolism	0	0	1000	0	2	3.1.3.100
r733	SACE_1298TenA family transcription regulator	Thiamin[c] + H2O[c] => 4ahmmp[c] + 4mhetz[c] + H[c]	(SACE_1298) or (SACE_7151)	SACE_1298,SACE_7151		Thiamine metabolism	0	0	1000	0	2	3.5.99.2
r734	phosphomethylpyrimidine kinase	ATP[c] + 4ahmmp[c] => ADP[c] + 4ampm[c]	(SACE_1297)	SACE_1297		Thiamine metabolism	0	0	1000	0	2	2.7.1.49 2.7.4.7
r735	SACE_0202cysteine desulfurase	(Enzyme)-cysteine[c] + L-Cysteine[c] => (Enzyme)-S-sulfanylcysteine[c] + L-Alanine[c]	(SACE_0202) or (SACE_2177) or (SACE_2615) or (SACE_6188)	SACE_0202,SACE_2177,SACE_2615,SACE_6188		Thiamine metabolism	0	0	1000	0	2	2.8.1.7
r736	1-deoxy-D-xylulose-5-phosphate synthase	Pyruvate[c] + g3p_D[c] => 1-Deoxy-xu5p_D[c] + CO2[c]	(SACE_1815)	SACE_1815		Thiamine metabolism	0	0	1000	0	2	2.2.1.7
r737	SACE_0506amino acid oxidase flavoprotein ThiO, putative	Glycine[c] => Iminoglycine[c]	(SACE_0506)	SACE_0506		Thiamine metabolism	0	0	1000	0	2	1.4.3.19
r738	thiazole synthase	1-Deoxy-xu5p_D[c] + Iminoglycine[c] + C15814[c] <=> 2-[(2R,5Z)-2-Carboxy-4-methylthiazol-5(2H)-ylidene]ethyl-phosphate[c] + C15810[c] + 2 H2O[c]	(SACE_0508)	SACE_0508		Thiamine metabolism	0	0	1000	0	2	2.8.1.10
r739	2-(2-carboxy-4-methylthiazol-5-yl)ethyl phosphate isomerase	2-[(2R,5Z)-2-Carboxy-4-methylthiazol-5(2H)-ylidene]ethyl-phosphate[c] <=> 2-(2-Carboxy-4-methylthiazol-5-yl)ethyl-phosphate[c]				Thiamine metabolism	0	0	1000	0	2	5.3.99.10
r740	thiamine-phosphate pyrophosphorylase	2mahmp[c] + 2-(2-Carboxy-4-methylthiazol-5-yl)ethyl-phosphate[c] <=> Diphosphate[c] + thmmp[c]	(SACE_0505)	SACE_0505		Thiamine metabolism	0	0	1000	0	2	2.5.1.3
r741	thiazole synthase [SP:tr:A4F730_SACEN]	C15815[c] + 1-Deoxy-xu5p_D[c] + L-Tyrosine[c] <=> 4-Methyl-5-(2-phosphoethyl)-thiazole[c]	(SACE_0508)	SACE_0508		Thiamine metabolism	1	-1000	1000	0	2	E_0508 thiG; thiazole synthase [SP:tr:A4F730_SACEN
r742	thiazole synthase [SP:tr:A4F730_SACEN]	C15815[c] + L-Tyrosine[c] + Iminoglycine[c] <=> 4-Methyl-5-(2-phosphoethyl)-thiazole[c]	(SACE_0508)	SACE_0508		Thiamine metabolism	1	-1000	1000	0	2	E_0508 thiG; thiazole synthase [SP:tr:A4F730_SACEN
r743	bifunctional db4p synthase/GTP cyclohydrolase II protein	GTP[c] + 3 H2O[c] => Formate[c] + 2,5-Diamino-6-(5'-phosphoribosylamino)-4-pyrimidineone[c] + Diphosphate[c]	(SACE_2123) or (SACE_2786) or (SACE_2884)	SACE_2123, SACE_2786,SACE_2884		Riboflavin metabolism	0	0	1000	0	2	3.5.4.25
r744	diaminohydroxyphosphoribosylaminopyrimidine deaminase / 5-amino-6-（5-phosphoribosylamino)uracil reductase	2,5-Diamino-6-(5'-phosphoribosylamino)-4-pyrimidineone[c] + H2O[c] => 5apru[c] + NH3[c]	(SACE_2121) or (SACE_2887)	SACE_2121,SACE_2887		Riboflavin metabolism	0	0	1000	0	2	3.5.4.26 1.1.1.193
r745	5-amino-6-（5-phosphoribosylamino)uracil reductase	5apru[c] + NADPH[c] + H[c] => 5aprbu[c] + NADP[c]	(SACE_1871) or (SACE_2121) or (SACE_2887)	SACE_1871,SACE_2121,SACE_2887		Riboflavin metabolism	0	0	1000	0	2	1.1.1.193
r746	hydrolase or phosphatase	5aprbu[c] + H2O[c] <=> 5-Amino-6-(1-D-ribitylamino)uracil[c] + Orthophosphate[c]	(SACE_1848)	SACE_1848		Riboflavin metabolism	1	-1000	1000	0	2	3.1.3.-
r747	bifunctional db4p synthase/GTP cyclohydrolase II protein	ru5p_D[c] => db4p[c] + Formate[c]	(SACE_2123)	SACE_2123		Riboflavin metabolism	0	0	1000	0	2	4.1.99.12
r748	riboflavin synthase beta chain	5-Amino-6-(1-D-ribitylamino)uracil[c] + db4p[c] => dmlz[c] + 2 H2O[c] + Orthophosphate[c]	(SACE_2124)	SACE_2124		Riboflavin metabolism	1	-1000	1000	0	2	2.5.1.78
r749	riboflavin synthase subunit alpha	2 dmlz[c] => Riboflavin[c] + 5-Amino-6-(1-D-ribitylamino)uracil[c]	(SACE_2122)	SACE_2122		Riboflavin metabolism	0	0	1000	0	2	2.5.1.9
r750	riboflavin kinase / FMN adenylyltransferase	ATP[c] + Riboflavin[c] => ADP[c] + FMN[c]	(SACE_5918)	SACE_5918		Riboflavin metabolism	0	0	1000	0	2	2.7.1.26 2.7.7.2
r751	riboflavin kinase / FMN adenylyltransferase	ATP[c] + FMN[c] => Diphosphate[c] + FAD[c]	(SACE_5918)	SACE_5918		Riboflavin metabolism	0	0	1000	0	2	2.7.1.26 2.7.7.2
r752	FMN reductase	FMN[c] + NADPH[c] + H[c] => fmnh2[c] + NADP[c]	(SACE_0288) or (SACE_3968)	SACE_0288,SACE_3968		Riboflavin metabolism	0	0	1000	0	2	1.5.1.38
r753	5,6-dimethylbenzimidazole synthase	fmnh2[c] + O2[c] => Dimethylbenzimidazole[c] + e4p[c] + H2O[c]	(SACE_0750)	SACE_0750		Riboflavin metabolism	0	0	1000	0	2	1.13.11.79
r754	hydrolase or phosphatase	5prdmbz[c] + H2O[c] <=> alpha-Ribazole[c] + Orthophosphate[c]	(SACE_1848)	SACE_1848		Riboflavin metabolism	1	-1000	1000	0	2	3.1.3.-
r755	pyridoxamine 5'-phosphate oxidase	Pyridoxamine[c] + H2O[c] + O2[c] <=> Pyridoxal[c] + NH3[c] + H2O2[c]	(SACE_0641)	SACE_0641		Vitamin B6 metabolism	1	-1000	1000	0	2	1.4.3.5
r756	pyridoxamine 5'-phosphate oxidase	Pyridoxal[c] + H2O2[c] <=> Pyridoxine[c] + O2[c]	(SACE_0641)	SACE_0641		Vitamin B6 metabolism	1	-1000	1000	0	2	1.4.3.5
r757	SACE_3303aldo/keto reductase	Pyridoxal[c] + NADPH[c] + H[c] <=> Pyridoxine[c] + NADP[c]	(SACE_3303)	SACE_3303		Vitamin B6 metabolism	0	0	0	0	2	1.1.1.65
r758	pyridoxamine 5'-phosphate oxidase	pyamp[c] + H2O[c] + O2[c] => pydx5p[c] + NH3[c] + H2O2[c]	(SACE_0641)	SACE_0641		Vitamin B6 metabolism	0	0	1000	0	2	1.4.3.5
r759	pyridoxamine 5'-phosphate oxidase	pdxp[c] + O2[c] => H2O2[c] + pydx5p[c]	(SACE_0641)	SACE_0641		Vitamin B6 metabolism	0	0	1000	0	2	1.4.3.5
r760	pyridoxine biosynthesis protein	g3p_D[c] + ru5p_D[c] + L-Glutamine[c] => pydx5p[c] + L-Glutamate[c]	(SACE_2009 and SACE_2017)	SACE_2009,SACE_2017		Vitamin B6 metabolism	0	0	1000	0	2	4.3.3.6
r761	phosphoserine aminotransferase	2-Oxo-3-hydroxy-4-phosphobutanoate[c] + L-Glutamate[c] <=> O-Phospho-4-hydroxy-L-threonine[c] + 2-Oxoglutarate[c]	(SACE_0630)	SACE_0630		Vitamin B6 metabolism	1	-1000	1000	0	2	2.6.1.52
r762	SACE_1007threonine synthase-like protein	O-Phospho-4-hydroxy-L-threonine[c] + H2O[c] => 4-Hydroxy-L-threonine[c] + Orthophosphate[c]	(SACE_1007) or (SACE_1437) or (SACE_6297)	SACE_1007,SACE_1437,SACE_6297		Vitamin B6 metabolism	0	0	1000	0	2	4.2.3.1
r763	4-hydroxythreonine-4-phosphate dehydrogenase	O-Phospho-4-hydroxy-L-threonine[c] + NAD[c] => 2-Amino-3-oxo-4-phosphonooxybutyrate[c] + NADH[c] + H[c]	(SACE_3460) or (SACE_4548) or (SACE_4549)	SACE_3460,SACE_4548,SACE_4549		Vitamin B6 metabolism	0	0	1000	0	2	1.1.1.262
r764	L-aspartate oxidase	L-Aspartate[c] + O2[c] => Iminoaspartate[c] + H2O2[c]	(SACE_5802)	SACE_5802		Nicotinate and nicotinamide metabolism	0	0	1000	0	2	1.4.3.16
r765	quinolinate synthetase [SP:tr:A4FLR2_SACEN]	Iminoaspartate[c] + dhap[c] => Pyridine-2,3-dicarboxylate[c] + 2 H2O[c] + Orthophosphate[c]	(SACE_5803)	SACE_5803		Nicotinate and nicotinamide metabolism	0	0	1000	0	2	E_5803 nadA
r766	nicotinate-nucleotide pyrophosphorylase	Pyridine-2,3-dicarboxylate[c] + prpp[c] => nicrnt[c] + Diphosphate[c] + CO2[c]	(SACE_5801)	SACE_5801		Nicotinate and nicotinamide metabolism	0	0	1000	0	2	2.4.2.19
r767	SACE_47205'-nucleotidase-like protein	nicrnt[c] + H2O[c] => nicrns[c] + Orthophosphate[c]	(SACE_4720)	SACE_4720		Nicotinate and nicotinamide metabolism	0	0	1000	0	2	3.1.3.5
r768	purine nucleoside phosphorylase	nicrns[c] + Orthophosphate[c] <=> Nicotinate[c] + r1p[c] + H[c]	(SACE_6547)	SACE_6547		Nicotinate and nicotinamide metabolism	1	-1000	1000	0	2	2.4.2.1
r769	nicotinate phosphoribosyltransferase	Nicotinate[c] + prpp[c] <=> nicrnt[c] + Diphosphate[c]	(SACE_1200) or (SACE_2423)	SACE_1200,SACE_2423		Nicotinate and nicotinamide metabolism	1	-1000	1000	0	2	6.3.4.21
r770	putative nicotinate-nucleotide adenylyltransferase	ATP[c] + nicrnt[c] <=> Diphosphate[c] + Deamino-NAD[c]	(SACE_1428)	SACE_1428		Nicotinate and nicotinamide metabolism	1	-1000	1000	0	2	2.7.7.18
r771	NADH pyrophosphatase	Deamino-NAD[c] + H2O[c] => AMP[c] + nicrnt[c]	(SACE_1091)	SACE_1091		Nicotinate and nicotinamide metabolism	0	0	1000	0	2	3.6.1.22
r772	glutamine-dependent NAD(+) synthetase	ATP[c] + Deamino-NAD[c] + L-Glutamine[c] + H2O[c] => AMP[c] + Diphosphate[c] + NAD[c] + L-Glutamate[c]	(SACE_1610)	SACE_1610		Nicotinate and nicotinamide metabolism	0	0	1000	0	2	6.3.5.1
r773	putative nicotinate-nucleotide adenylyltransferase	ATP[c] + nmn[c] <=> Diphosphate[c] + NAD[c]	(SACE_1428)	SACE_1428		Nicotinate and nicotinamide metabolism	1	-1000	1000	0	2	2.7.7.18
r774	NADH pyrophosphatase	NAD[c] + H2O[c] => AMP[c] + nmn[c]	(SACE_1091)	SACE_1091		Nicotinate and nicotinamide metabolism	0	0	1000	0	2	3.6.1.22
r775	nicotinamide-nucleotide amidase	nmn[c] + H2O[c] => nicrnt[c] + NH3[c]	(SACE_5880)	SACE_5880		Nicotinate and nicotinamide metabolism	0	0	1000	0	2	3.5.1.42
r776	SACE_47205'-nucleotidase-like protein	nmn[c] + H2O[c] => N-Ribosylnicotinamide[c] + Orthophosphate[c]	(SACE_4720)	SACE_4720		Nicotinate and nicotinamide metabolism	0	0	1000	0	2	3.1.3.5
r777	ATP:N-ribosylnicotinamide 5'-phosphotransferase	ATP[c] + N-Ribosylnicotinamide[c] => ADP[c] + nmn[c]				Nicotinate and nicotinamide metabolism	0	0	1000	0	2	2.7.1.22	reaction added for NAD pathway
r778	SACE_0339inosine-uridine preferring nucleoside hydrolase	N-Ribosylnicotinamide[c] + H2O[c] => Nicotinamide[c] + D-Ribose[c]	(SACE_0339) or (SACE_1231) or (SACE_3233)	SACE_0339,SACE_1231,SACE_3233		Nicotinate and nicotinamide metabolism	0	0	1000	0	2	3.2.2.1
r779	purine nucleoside phosphorylase	N-Ribosylnicotinamide[c] + Orthophosphate[c] <=> Nicotinamide[c] + r1p[c]	(SACE_6547)	SACE_6547		Nicotinate and nicotinamide metabolism	1	-1000	1000	0	2	2.4.2.1
r780	purine nucleoside phosphorylase	N-Ribosylnicotinamide[c] + H2O[c] <=> Nicotinamide[c] + D-Ribose[c]	(SACE_0339) or (SACE_3233)	SACE_0339,SACE_3233		Nicotinate and nicotinamide metabolism	0	0	1000	0	2	3.2.2.1
r781	pyrazinamidase / nicotinamidase	Nicotinamide[c] + H2O[c] => Nicotinate[c] + NH3[c]	(SACE_1199) or (SACE_2641)	SACE_1199,SACE_2641		Nicotinate and nicotinamide metabolism	0	0	1000	0	2	3.5.1.19 3.5.1.-
r782	SACE_5249putative inorganic polyphosphate/ATP-NAD kinase	ATP[c] + NAD[c] => ADP[c] + NADP[c]	(SACE_5249)	SACE_5249		Nicotinate and nicotinamide metabolism	0	0	1000	0	2	2.7.1.23
r783	NAD(P) transhydrogenase subunit alpha	NADPH[c] + NAD[c] => NADP[c] + NADH[c]	(SACE_5818 and SACE_5819 and SACE_5820)	SACE_5818,SACE_5819,SACE_5820		Nicotinate and nicotinamide metabolism	0	0	1000	0	2	1.6.1.2
r784	acetolactate synthase large subunit	2 Pyruvate[c] => 2-Acetolactate[c] + CO2[c]	(SACE_0604 and SACE_3465 and SACE_3908 and SACE_4565 and SACE_5632 and SACE_6158 and SACE_6159)	SACE_0604,SACE_3465,SACE_3908,SACE_4565 SACE_5632,SACE_6158,SACE_6159		Pantothenate and CoA biosynthesis	0	0	1000	0	2	2.2.1.6
r785	acetolactate synthase large subunit	2ahethmpp[c] + Pyruvate[c] => 2-Acetolactate[c] + thmpp[c]	(SACE_0604 and SACE_3465 and SACE_3908 and SACE_4565 and SACE_5632 and SACE_6158 and SACE_6159)	SACE_0604,SACE_3465,SACE_3908,SACE_4565 SACE_5632,SACE_6158,SACE_6159		Pantothenate and CoA biosynthesis	0	0	1000	0	2	2.2.1.6
r786	ketol-acid reductoisomerase	2-Acetolactate[c] + NADPH[c] + H[c] <=> 2,3-Dihydroxy-3-methylbutanoate[c] + NADP[c]	(SACE_6157)	SACE_6157		Pantothenate and CoA biosynthesis	1	-1000	1000	0	2	1.1.1.86
r787	dihydroxy-acid dehydratase	2,3-Dihydroxy-3-methylbutanoate[c] <=> 3moa[c] + H2O[c]	(SACE_1280) or (SACE_5858) or (SACE_6161)	SACE_1280,SACE_5858,SACE_6161		Pantothenate and CoA biosynthesis	1	-1000	1000	0	2	4.2.1.9
r788	3-methyl-2-oxobutanoate hydroxymethyltransferase	mlthf[c] + 3moa[c] + H2O[c] => Tetrahydrofolate[c] + 2-Dehydropantoate[c]	(SACE_1604)	SACE_1604		Pantothenate and CoA biosynthesis	0	0	1000	0	2	2.1.2.11
r789	SACE_18602-dehydropantoate 2-reductase	2-Dehydropantoate[c] + NADPH[c] + H[c] <=> (R)-Pantoate[c] + NADP[c]	(SACE_1860)	SACE_1860		Pantothenate and CoA biosynthesis	1	-1000	1000	0	2	1.1.1.169
r790	aspartate 1-decarboxylase precursor	L-Aspartate[c] <=> beta-Alanine[c] + CO2[c]	(SACE_0407)	SACE_0407		Pantothenate and CoA biosynthesis	1	-1000	1000	0	2	4.1.1.11
r791	pantoate--beta-alanine ligase	ATP[c] + (R)-Pantoate[c] + beta-Alanine[c] => AMP[c] + Diphosphate[c] + Pantothenate[c]	(SACE_0406)	SACE_0406		Pantothenate and CoA biosynthesis	0	0	1000	0	2	6.3.2.1
r792	SACE_0408accessory factor Bvg	ATP[c] + Pantothenate[c] => ADP[c] + 4ppan[c]	(SACE_0408) or (SACE_1986)	SACE_0408,SACE_1986		Pantothenate and CoA biosynthesis	0	0	1000	0	2	2.7.1.33
r793	SACE_0408accessory factor Bvg	ATP[c] + N-((R)-Pantothenoyl)-L-cysteine[c] => ADP[c] + (R)-4'-Phosphopantothenoyl-L-cysteine[c]	(SACE_0408) or (SACE_1986)	SACE_0408,SACE_1986		Pantothenate and CoA biosynthesis	0	0	1000	0	2	2.7.1.33
r794	DNA/pantothenate metabolism flavoprotein	ATP[c] + 4ppan[c] + L-Cysteine[c] => AMP[c] + Diphosphate[c] + (R)-4'-Phosphopantothenoyl-L-cysteine[c]	(SACE_2102)	SACE_2102		Pantothenate and CoA biosynthesis	0	0	1000	0	2	4.1.1.36 6.3.2.5
r795	DNA/pantothenate metabolism flavoprotein	CTP[c] + 4ppan[c] + L-Cysteine[c] => CMP[c] + Diphosphate[c] + (R)-4'-Phosphopantothenoyl-L-cysteine[c]	(SACE_2102)	SACE_2102		Pantothenate and CoA biosynthesis	0	0	1000	0	2	4.1.1.36 6.3.2.5
r796	DNA/pantothenate metabolism flavoprotein	(R)-4'-Phosphopantothenoyl-L-cysteine[c] <=> pan4p[c] + CO2[c]	(SACE_2102)	SACE_2102		Pantothenate and CoA biosynthesis	1	-1000	1000	0	2	4.1.1.36 6.3.2.5
r797	SACE_0408accessory factor Bvg	ATP[c] + Pantetheine[c] => ADP[c] + pan4p[c]	(SACE_0408) or (SACE_1986)	SACE_0408,SACE_1986		Pantothenate and CoA biosynthesis	0	0	1000	0	2	2.7.1.33
r798	pantetheine-phosphate adenylyltransferase	ATP[c] + pan4p[c] <=> Diphosphate[c] + Dephospho-CoA[c]	(SACE_6106)	SACE_6106		Pantothenate and CoA biosynthesis	1	-1000	1000	0	2	2.7.7.3
r799	fused dephospho-CoA kinase/unknown domain-containing protein	ATP[c] + Dephospho-CoA[c] => ADP[c] + CoA[c]	(SACE_5429)	SACE_5429		Pantothenate and CoA biosynthesis	0	0	1000	0	2	2.7.1.24
r800	putative holo-ACP synthase	CoA[c] + Apo-ACP[c] => pap[c] + ACP[c]	(SACE_6767)	SACE_6767		Pantothenate and CoA biosynthesis	0	0	1000	0	2	2.7.8.7
r801	[Acyl-carrier-protein] 4'-pantetheine-phosphohydrolase	ACP[c] + H2O[c] => pan4p[c] + Apo-ACP[c]				Pantothenate and CoA biosynthesis	0	0	1000	0	2	3.1.4.14
r802	SACE_50386-carboxyhexanoate-CoA ligase	ATP[c] + 6-Carboxyhexanoate[c] + CoA[c] => AMP[c] + Diphosphate[c] + 6-Carboxyhexanoyl-CoA[c]	(SACE_5038)	SACE_5038		Biotin metabolism	0	0	1000	0	2	6.2.1.14
r803	8-amino-7-oxononanoate synthase	6-Carboxyhexanoyl-CoA[c] + L-Alanine[c] => 8-Amino-7-oxononanoate[c] + CoA[c] + CO2[c]	(SACE_0977) or (SACE_4685)	SACE_0977,SACE_4685		Biotin metabolism	0	0	1000	0	2	2.3.1.47
r804	adenosylmethionine-8-amino-7-oxononanoate aminotransferase	amet[c] + 8-Amino-7-oxononanoate[c] => S-Adenosyl-4-methylthio-2-oxobutanoate[c] + 7,8-Diaminononanoate[c]	(SACE_4684)	SACE_4684		Biotin metabolism	0	0	1000	0	2	2.6.1.62
r805	dithiobiotin synthetase	ATP[c] + 7,8-Diaminononanoate[c] + CO2[c] <=> ADP[c] + Orthophosphate[c] + Dethiobiotin[c]	(SACE_0978)	SACE_0978		Biotin metabolism	1	-1000	1000	0	2	6.3.3.3
r806	biotin synthase	Dethiobiotin[c] + Sulfur[c] + 2 amet[c] + 2 e[c] + 2 H[c] => Biotin[c] + 2 L-Methionine[c] + 2 5'-Deoxyadenosine[c]	(SACE_4683)	SACE_4683		Biotin metabolism	0	0	1000	0	2	2.8.1.6
r807	SACE_6501biotin--[acetyl-CoA-carboxylase] ligase	ATP[c] + Biotin[c] => Diphosphate[c] + Biotinyl-5'-AMP[c]	(SACE_6501)	SACE_6501		Biotin metabolism	0	0	1000	0	2	6.3.4.15
r808	SACE_6501biotin--[acetyl-CoA-carboxylase] ligase	Biotinyl-5'-AMP[c] + Apo-carboxylase[c] => AMP[c] + Holo-carboxylase[c]	(SACE_6501)	SACE_6501		Biotin metabolism	0	0	1000	0	2	6.3.4.15
r809	SACE_1611exported protease	Holo-carboxylase[c] => N6-D-Biotinyl-L-lysine[c] + Peptide(a)[c]	(SACE_1611) or (SACE_5913) or (SACE_6352) or (SACE_6794)	SACE_1611,SACE_5913,SACE_6352,SACE_6794		Biotin metabolism	0	0	1000	0	2	3.4.-.- 2.4.2.-
r810	N6-D-Biotinyl-L-lysine amidohydrolase	N6-D-Biotinyl-L-lysine[c] + H2O[c] => Biotin[c] + L-Lysine[c]				Biotin metabolism	0	0	1000	0	2	3.5.1.12
r811	lipoyltransferase	Octanoyl-ACP[c] + Apoprotein[c] => N6-(octanoyl)lysine(Protein)[c] + ACP[c]	(SACE_1636)	SACE_1636		Lipoic acid metabolism	0	0	1000	0	2	2.3.1.181
r812	lipoyl synthase	N6-(octanoyl)lysine(Protein)[c] + 2 Sulfur[c] + 2 amet[c] => N6-(lipoyl)lysine(Protein)[c] + 2 L-Methionine[c] + 2 5'-Deoxyadenosine[c]	(SACE_1626)	SACE_1626		Lipoic acid metabolism	0	0	1000	0	2	2.8.1.8
r813	lipoyl synthase	Octanoyl-ACP[c] + 2 Sulfur[c] + 2 amet[c] => Lipoyl-ACP[c] + 2 L-Methionine[c] + 2 5'-Deoxyadenosine[c]	(SACE_1626)	SACE_1626		Lipoic acid metabolism	0	0	1000	0	2	2.8.1.8
r814	lipoyltransferase	Lipoyl-ACP[c] + Apoprotein[c] => N6-(lipoyl)lysine(Protein)[c] + ACP[c]	(SACE_1636)	SACE_1636		Lipoic acid metabolism	0	0	1000	0	2	2.3.1.181
r815	lipoate-protein ligase A	ATP[c] + Lipoate[c] => Diphosphate[c] + Lipoyl-AMP[c]	(SACE_3586)	SACE_3586		Lipoic acid metabolism	0	0	1000	0	2	2.7.7.63
r816	lipoate-protein ligase A	Lipoyl-AMP[c] + Apoprotein[c] => N6-(lipoyl)lysine(Protein)[c] + AMP[c]	(SACE_3586)	SACE_3586		Lipoic acid metabolism	0	0	1000	0	2	2.7.7.63
r817	lipoate-protein ligase A	ATP[c] + Lipoate[c] + Apoprotein[c] => N6-(lipoyl)lysine(Protein)[c] + AMP[c] + Diphosphate[c]	(SACE_3586)	SACE_3586		Lipoic acid metabolism	0	0	1000	0	2	6.3.1.20
r818	GTP cyclohydrolase I	GTP[c] + H2O[c] => Formamidopyrimidine-NTP[c]	(SACE_0397) or (SACE_4692)	SACE_0397,SACE_4692		Folate biosynthesis	0	0	1000	0	2	3.5.4.16
r819	GTP cyclohydrolase I	Formamidopyrimidine-NTP[c] + H2O[c] => 2,5-Diaminopyrimidine-NTP[c] + Formate[c]	(SACE_0397) or (SACE_4692)	SACE_0397,SACE_4692		Folate biosynthesis	0	0	1000	0	2	3.5.4.16
r820	GTP cyclohydrolase I	2,5-Diaminopyrimidine-NTP[c] => 2,5-Diamino-6-(5'-triphosphoryl-3',4'-trihydroxy-2'-oxopentyl)-amino-4-oxopyrimidine[c]	(SACE_0397) or (SACE_4692)	SACE_0397,SACE_4692		Folate biosynthesis	0	0	1000	0	2	3.5.4.16
r821	GTP cyclohydrolase I	2,5-Diamino-6-(5'-triphosphoryl-3',4'-trihydroxy-2'-oxopentyl)-amino-4-oxopyrimidine[c] => ahdt[c] + H2O[c]	(SACE_0397) or (SACE_4692)	SACE_0397,SACE_4692		Folate biosynthesis	0	0	1000	0	2	3.5.4.16
r822	alkaline phosphatase D	ahdt[c] + 3 H2O[c] => ahd[c] + 3 Orthophosphate[c]	(SACE_0052) or (SACE_0175) or (SACE_1400) or (SACE_6716) or (SACE_6720)	SACE_0052,SACE_0175,SACE_1400,SACE_6716,SACE_6720		Folate biosynthesis	0	0	1000	0	2	3.1.3.1	reaction added for folate biosynthesis pathway
r823	dihydroneopterin aldolase	ahd[c] => Glycolaldehyde[c] + 2ahhmp[c]	(SACE_0399)	SACE_0399		Folate biosynthesis	0	0	1000	0	2	4.1.2.25
r824	2-amino-4-hydroxy-6-hydroxymethyldihydropteridine pyrophosphokinase	ATP[c] + 2ahhmp[c] => AMP[c] + 2ahhmd[c]	(SACE_0400)	SACE_0400		Folate biosynthesis	0	0	1000	0	2	2.7.6.3
r825	putative p-aminobenzoate synthase glutamine amidotransferase	Chorismate[c] + L-Glutamine[c] => 4adcho[c] + L-Glutamate[c]	(SACE_0040 and SACE_0793) or (SACE_4036)	SACE_0040,SACE_0793,SACE_4036		Folate biosynthesis	0	0	1000	0	2	2.6.1.85
r826	amino acid aminotransferase	4adcho[c] => 4-Aminobenzoate[c] + Pyruvate[c]	(SACE_7111)	SACE_7111		Folate biosynthesis	0	0	1000	0	2	4.1.3.38
r827	7,8-dihydropteroate synthase （partial match)	2ahhmp[c] + 4-Aminobenzoate[c] => Dihydropteroate[c] + H2O[c]	(SACE_0398) or (SACE_1023) or (SACE_4499)	SACE_0398,SACE_1023,SACE_4499		Folate biosynthesis	0	0	1000	0	2	2.5.1.15
r828	7,8-dihydropteroate synthase （partial match)	2ahhmd[c] + 4-Aminobenzoate[c] => Diphosphate[c] + Dihydropteroate[c]	(SACE_0398) or (SACE_1023) or (SACE_4499)	SACE_0398,SACE_1023,SACE_4499		Folate biosynthesis	0	0	1000	0	2	2.5.1.15
r829	folylpolyglutamate synthase	ATP[c] + Dihydropteroate[c] + L-Glutamate[c] => ADP[c] + Orthophosphate[c] + Dihydrofolate[c]	(SACE_1387)	SACE_1387		Folate biosynthesis	0	0	1000	0	2	6.3.2.12 6.3.2.17
r830	Dihydrofolate:NAD oxidoreductase	Dihydrofolate[c] + NAD[c] <=> Folate[c] + NADH[c] + H[c]				Folate biosynthesis	1	-1000	1000	0	2	1.5.1.3	reacton added for folate biosynthesis
r831	5,6,7,8-tetrahydrofolate:NAD oxidoreductase	Folate[c] + 2 NADH[c] + 2 H[c] => Tetrahydrofolate[c] + 2 NAD[c]				Folate biosynthesis	0	0	1000	0	2	1.5.1.3	reaction added for gap filling
r832	5,6,7,8-Tetrahydrofolate:NADP oxidoreductase	Dihydrofolate[c] + NADPH[c] + H[c] <=> Tetrahydrofolate[c] + NADP[c]				Folate biosynthesis	0	0	0	0	2	1.5.1.3	reaction added for THF biosynthesis pathway
r833	folylpolyglutamate synthase	ATP[c] + Tetrahydrofolate[c] + L-Glutamate[c] <=> ADP[c] + Orthophosphate[c] + Tetrahydrofolyl-Glu[c]	(SACE_1387)	SACE_1387		Folate biosynthesis	1	-1000	1000	0	2	6.3.2.12 6.3.2.17
r834	folylpolyglutamate synthase	ATP[c] + thfglu(n)(n)[c] + L-Glutamate[c] => ADP[c] + Orthophosphate[c] + thfglu(n)(n+1)[c]	(SACE_1387)	SACE_1387		Folate biosynthesis	0	0	1000	0	2	6.3.2.12 6.3.2.17
r835	SACE_0317anion transporter ATPase	dhpp[c] + H2O[c] => ahd[c] + Orthophosphate[c]	(SACE_0317) or (SACE_1077) or (SACE_1078) or (SACE_1092) or (SACE_3656) or (SACE_5126) or (SACE_6964)	SACE_0317,SACE_1077,SACE_1078,SACE_1092,SACE_3656,SACE_5126,SACE_6964		Folate biosynthesis	0	0	1000	0	2	3.6.1.-
r836	SACE_0317anion transporter ATPase	ahdt[c] + H2O[c] <=> dhpp[c] + Diphosphate[c]	(SACE_0317) or (SACE_1077) or (SACE_1078) or (SACE_1092) or (SACE_3656) or (SACE_5126) or (SACE_6964)	SACE_0317,SACE_1077,SACE_1078,SACE_1092,SACE_3656,SACE_5126,SACE_6964		Folate biosynthesis	1	-1000	1000	0	2	3.6.1.67
r837	putative methylenetetrahydrofolate dehydrogenase/methenyltetrahydrofolate cyclohydrolase	Tetrahydrofolate[c] + Formate[c] + ATP[c] => ADP[c] + Orthophosphate[c] + 10fthf[c]	(SACE_4498) or (SACE_5619) or (SACE_6651)	SACE_4498,SACE_5619,SACE_6651		One carbon pool by folate	0	0	1000	0	2	6.3.4.3
r838	methionyl-tRNA formyltransferase	L-Methionyl-tRNA(Met)[c] + 10fthf[c] => Tetrahydrofolate[c] + N-Formylmethionyl-tRNA[c]	(SACE_2113) or (SACE_2691)	SACE_2113,SACE_2691		One carbon pool by folate	0	0	1000	0	2	2.1.2.9
r839	putative methylenetetrahydrofolate dehydrogenase/methenyltetrahydrofolate cyclohydrolase	10fthf[c] + H[c] <=> methf[c] + H2O[c]	(SACE_4498) or (SACE_5619) or (SACE_6651)	SACE_4498,SACE_5619,SACE_6651		One carbon pool by folate	1	-1000	1000	0	2	1.5.1.5 3.5.4.9
r840	SACE_5617aminomethyltransferase	methf[c] + H2O[c] => 5-Formyltetrahydrofolate[c]	(SACE_5617) or (SACE_5701)	SACE_5617,SACE_5701		One carbon pool by folate	0	0	1000	0	2	2.1.2.10
r841	SACE_07735-formyltetrahydrofolate cyclo-ligase	ATP[c] + 5-Formyltetrahydrofolate[c] + H[c] => ADP[c] + Orthophosphate[c] + methf[c]	(SACE_0773)	SACE_0773		One carbon pool by folate	0	0	1000	0	2	6.3.3.2
r842	putative methylenetetrahydrofolate dehydrogenase/methenyltetrahydrofolate cyclohydrolase	methf[c] + NADPH[c] <=> mlthf[c] + NADP[c]	(SACE_4498) or (SACE_5619) or (SACE_6651)	SACE_4498,SACE_5619,SACE_6651		One carbon pool by folate	1	-1000	1000	0	2	1.5.1.5 3.5.4.9
r843	mlthf reductase	mlthf[c] + NADH[c] + H[c] => 5mthf[c] + NAD[c]	(SACE_1715) or (SACE_3895) or (SACE_5618)	SACE_1715,SACE_3895,SACE_5618		One carbon pool by folate	0	0	1000	0	2	1.5.1.20
r844	mlthf reductase	mlthf[c] + NADPH[c] + H[c] => 5mthf[c] + NADP[c]	(SACE_1715) or (SACE_3895) or (SACE_5618)	SACE_1715,SACE_3895,SACE_5618		One carbon pool by folate	0	0	1000	0	2	1.5.1.20
r845	glutamyl-tRNA synthetase	tRNA(Glu)[c] + L-Glutamate[c] + ATP[c] => L-Glutamyl-tRNA(Glu)[c] + Diphosphate[c] + AMP[c]	(SACE_6148)	SACE_6148		Porphyrin and chlorophyll metabolism	0	0	1000	0	2	6.1.1.17
r846	glutamyl-tRNA reductase	L-Glutamyl-tRNA(Glu)[c] + NADPH[c] + H[c] => (S)-4-Amino-5-oxopentanoate[c] + tRNA(Glu)[c] + NADP[c]	(SACE_6946)	SACE_6946		Porphyrin and chlorophyll metabolism	0	0	1000	0	2	1.2.1.70
r847	glutamate-1-semialdehyde 2,1-aminomutase	(S)-4-Amino-5-oxopentanoate[c] => 5-Aminolevulinate[c]	(SACE_6935)	SACE_6935		Porphyrin and chlorophyll metabolism	0	0	1000	0	2	5.4.3.8
r848	succinyl-CoA:glycine C-succinyltransferase (decarboxylating)	Succinyl-CoA[c] + Glycine[c] => 5-Aminolevulinate[c] + CoA[c] + CO2[c]				Porphyrin and chlorophyll metabolism	0	0	1000	0	2	2.3.1.37	reaction added for gap filling
r849	delta-aminolevulinic acid dehydratase	2 5-Aminolevulinate[c] => Porphobilinogen[c] + 2 H2O[c]	(SACE_6943)	SACE_6943		Porphyrin and chlorophyll metabolism	0	0	1000	0	2	4.2.1.24
r850	porphobilinogen deaminase	4 Porphobilinogen[c] + H2O[c] => Hydroxymethylbilane[c] + 4 NH3[c]	(SACE_6945)	SACE_6945		Porphyrin and chlorophyll metabolism	0	0	1000	0	2	2.5.1.61
r851	SACE_1074uroporphyrinogen-III synthetase	Hydroxymethylbilane[c] => uppg3[c] + H2O[c]	(SACE_1074) or (SACE_3804) or (SACE_6944)	SACE_1074,SACE_3804,SACE_6944		Porphyrin and chlorophyll metabolism	0	0	1000	0	2	4.2.1.75
r852	uroporphyrinogen decarboxylase （partial match)	uppg3[c] => cpppg3[c] + 4 CO2[c]	(SACE_1836)	SACE_1836		Porphyrin and chlorophyll metabolism	0	0	1000	0	2	4.1.1.37
r853	SACE_1477cpppg3 oxidase	cpppg3[c] + 2 amet[c] => pppg9[c] + 2 CO2[c] + 2 L-Methionine[c] + 2 5'-Deoxyadenosine[c]	(SACE_1477) or (SACE_4563)	SACE_1477,SACE_4563		Porphyrin and chlorophyll metabolism	0	0	1000	0	2	1.3.99.22
r854	ppp9ogen oxidase	2 pppg9[c] + 3 O2[c] => 2 ppp9[c] + 6 H2O[c]	(SACE_1837) or (SACE_3215)	SACE_1837,SACE_3215		Porphyrin and chlorophyll metabolism	0	0	1000	0	2	1.3.3.4
r855	SACE_2215magnesium chelatase subunit ChlI	ATP[c] + ppp9[c] + Magnesium[c] + H2O[c] => ADP[c] + Orthophosphate[c] + mg2ppp9[c] + 2 H[c]	(SACE_2215 and SACE_5965)	SACE_2215,SACE_5965		Porphyrin and chlorophyll metabolism	0	0	1000	0	2	6.6.1.1
r856	ferrochelatase	ppp9[c] + Fe2[c] => Heme[c] + 2 H[c]	(SACE_3785)	SACE_3785		Porphyrin and chlorophyll metabolism	0	0	1000	0	2	4.99.1.1
r857	protoheme IX farnesyltransferase	Heme[c] => hemeO[c]	(SACE_1312) or (SACE_2161)	SACE_1312,SACE_2161		Porphyrin and chlorophyll metabolism	0	0	1000	0	2	2.5.1.-
r858	cytochrome oxidase assembly protein [SP:tr:A4FBP9_SACEN]	hemeO[c] => hemeA_1[c]	(SACE_2168)	SACE_2168		Porphyrin and chlorophyll metabolism	0	0	1000	0	2	E_2168 ctaA; cytochrome oxidase assembly protein [SP:tr:A4FBP9_SACEN
r859	SACE_5957uroporphyrin-III C-methyltransferase	2 amet[c] + uppg3[c] => 2 ahcys[c] + pre2[c]	(SACE_5957) or (SACE_6944)	SACE_5957,SACE_6944		Porphyrin and chlorophyll metabolism	0	0	1000	0	2	2.1.1.107 1.3.1.76 4.99.1.4
r860	SACE_5951precorrin-3B C17-methyltransferase	amet[c] + pre2[c] => ahcys[c] + pre3a[c] + H[c]	(SACE_5951)	SACE_5951		Porphyrin and chlorophyll metabolism	0	0	1000	0	2	2.1.1.130 2.1.1.131
r861	SACE_5953cobalamin biosynthesis protein CobG,precorrin-3B synthase	pre3a[c] + O2[c] + NADH[c] + H[c] => pre3b[c] + NAD[c] + H2O[c]	(SACE_5953)	SACE_5953		Porphyrin and chlorophyll metabolism	0	0	1000	0	2	1.14.13.83
r862	SACE_5951precorrin-3B C17-methyltransferase	amet[c] + pre3b[c] => ahcys[c] + pre4[c]	(SACE_5951) or (SACE_5960)	SACE_5951,SACE_5960		Porphyrin and chlorophyll metabolism	0	0	1000	0	2	2.1.1.130 2.1.1.131
r863	precorrin-4 C11-methyltransferase	amet[c] + pre4[c] => ahcys[c] + pre5[c]	(SACE_5945)	SACE_5945		Porphyrin and chlorophyll metabolism	0	0	1000	0	2	2.1.1.133
r864	Porphyrin and chlorophyll metabolism	pre5[c] + amet[c] + H2O[c] => pre6x[c] + Acetate[c] + ahcys[c]				Porphyrin and chlorophyll metabolism	0	0	1000	0	2	2.1.1.152	reaction added for gap filling
r865	precorrin-6A reductase	pre6x[c] + NADPH[c] + H[c] => pre6y[c] + NADP[c]	(SACE_5950)	SACE_5950		Porphyrin and chlorophyll metabolism	0	0	1000	0	2	1.3.1.54
r866	precorrin-6Y C（5,15)-methyltransferase	2 amet[c] + pre6y[c] => 2 ahcys[c] + pre8x[c] + CO2[c]	(SACE_5944 and SACE_5961)	SACE_5944,SACE_5961		Porphyrin and chlorophyll metabolism	0	0	1000	0	2	2.1.1.132 1.-.-.-
r867	precorrin-8X methylmutase	pre8x[c] => Hydrogenobyrinate[c]	(SACE_5952)	SACE_5952		Porphyrin and chlorophyll metabolism	0	0	1000	0	2	5.4.99.61
r868	cobyrinic acid a,c-diamide synthase	Hydrogenobyrinate[c] + 2 L-Glutamine[c] + 2 ATP[c] + 2 H2O[c] => hgbam[c] + 2 Orthophosphate[c] + 2 L-Glutamate[c] + 2 ADP[c]	(SACE_5963)	SACE_5963		Porphyrin and chlorophyll metabolism	0	0	1000	0	2	6.3.5.9
r869	cobaltochelatase	hgbam[c] + Cobalt[c] + ATP[c] + H2O[c] => co2dam[c] + Orthophosphate[c] + ADP[c] + H[c]	(SACE_5955)	SACE_5955		Porphyrin and chlorophyll metabolism	0	0	1000	0	2	6.6.1.2
r870	SACE_0750Cob（II)yrinic acid a,c-diamide reductase	2 co2dam[c] + fmnh2[c] => 2 co1dam[c] + FMN[c] + 2 H[c]	(SACE_0750)	SACE_0750		Porphyrin and chlorophyll metabolism	0	0	1000	0	2	1.16.8.1
r871	SACE_5964cob（I)yrinic acid a,c-diamide adenosyltransferase	co1dam[c] + ATP[c] => adcob1nda[c] + Triphosphate[c]	(SACE_5964)	SACE_5964		Porphyrin and chlorophyll metabolism	0	0	1000	0	2	2.5.1.17
r872	cobyric acid synthase	adcob1nda[c] + 4 L-Glutamine[c] + 4 ATP[c] + 4 H2O[c] => adcobn[c] + 4 L-Glutamate[c] + 4 Orthophosphate[c] + 4 ADP[c]	(SACE_5983)	SACE_5983		Porphyrin and chlorophyll metabolism	0	0	1000	0	2	6.3.5.10
r873	cobalamin biosynthesis protein	ATP[c] + adcobn[c] + (R)-1-Aminopropan-2-ol[c] => ADP[c] + Orthophosphate[c] + adocbi[c]	(SACE_1574)	SACE_1574		Porphyrin and chlorophyll metabolism	0	0	1000	0	2	6.3.1.10
r874	SACE_5964cob（I)yrinic acid a,c-diamide adenosyltransferase	ATP[c] + Cobinamide[c] => Triphosphate[c] + adocbi[c]	(SACE_5964)	SACE_5964		Porphyrin and chlorophyll metabolism	0	0	1000	0	2	2.5.1.17
r875	cobinamide kinase / conamide phosphate guanylyltransferase	adocbi[c] + ATP[c] => adocbip[c] + ADP[c]	(SACE_1651)	SACE_1651		Porphyrin and chlorophyll metabolism	0	0	1000	0	2	2.7.1.156 2.7.7.62
r876	cobinamide kinase / conamide phosphate guanylyltransferase	adocbi[c] + GTP[c] => adocbip[c] + GDP[c]	(SACE_1651)	SACE_1651		Porphyrin and chlorophyll metabolism	0	0	1000	0	2	2.7.1.156 2.7.7.62
r877	unclear reaction	L-Threonine[c] => thrp[c]				Porphyrin and chlorophyll metabolism	1	-1000	1000	0	2	2.7.1.177	reaction added for gap filling
r878	L-threonine-O-3-phosphate carboxy-lyase	thrp[c] => applp[c] + CO2[c]				Porphyrin and chlorophyll metabolism	1	-1000	1000	0	2	4.1.1.81	reaction added for gap filling
r879	cobalamin biosynthesis protein	adcobn[c] + applp[c] + ATP[c] => adocbip[c] + ADP[c] + Orthophosphate[c]	(SACE_1574)	SACE_1574		Porphyrin and chlorophyll metabolism	0	0	1000	0	2	6.3.1.10
r880	cobinamide kinase / conamide phosphate guanylyltransferase	adocbip[c] + GTP[c] => Adenosine-GDP-cobinamide[c] + Diphosphate[c]	(SACE_1651)	SACE_1651		Porphyrin and chlorophyll metabolism	0	0	1000	0	2	2.7.1.156 2.7.7.62
r881	nicotinate-nucleotide--dimethylbenzimidazole phosphoribosyltransferase	nicrnt[c] + Dimethylbenzimidazole[c] <=> Nicotinate[c] + N1-(5-Phospho-alpha-D-ribosyl)-5,6-dimethylbenzimidazole[c] + H[c]	(SACE_1650)	SACE_1650		Porphyrin and chlorophyll metabolism	1	-1000	1000	0	2	2.4.2.21
r882	adenosylcobalamin/alpha-ribazole phosphatase	N1-(5-Phospho-alpha-D-ribosyl)-5,6-dimethylbenzimidazole[c] + H2O[c] => alpha-Ribazole[c] + Orthophosphate[c]				Porphyrin and chlorophyll metabolism	0	0	1000	0	2	3.1.3.73
r883	putative cobalamin 5'-phosphate synthase	Adenosine-GDP-cobinamide[c] + alpha-Ribazole[c] => adocbl[c] + GMP[c]	(SACE_1649)	SACE_1649		Porphyrin and chlorophyll metabolism	0	0	1000	0	2	2.7.8.26
r884	SACE_5957uroporphyrin-III C-methyltransferase	pre2[c] + NAD[c] => Sirohydrochlorin[c] + NADH[c] + H[c]	(SACE_5957)	SACE_5957		Porphyrin and chlorophyll metabolism	0	0	1000	0	2	2.1.1.107 1.3.1.76 4.99.1.4
r885	SACE_5957uroporphyrin-III C-methyltransferase	Fe2[c] + Sirohydrochlorin[c] => Siroheme[c] + 2 H[c]	(SACE_5957)	SACE_5957		Porphyrin and chlorophyll metabolism	0	0	1000	0	2	2.1.1.107 1.3.1.76 4.99.1.4
r886	sirohydrochlorin cobalt-lyase	Sirohydrochlorin[c] + Cobalt(ion)[c] => Cobalt-sirohydrochlorin[c] + 2 H[c]				Porphyrin and chlorophyll metabolism	0	0	1000	0	2	4.99.1.3	reaction added for gap filling
r887	cobalt-factor II C20-methyltransferase	Cobalt-sirohydrochlorin[c] + amet[c] => Cobalt-factor3[c] + ahcys[c]				Porphyrin and chlorophyll metabolism	0	0	1000	0	2	2.1.1.151
r888	copre3 dehydrogenase	Cobalt-factor3[c] => copre3[c]				Porphyrin and chlorophyll metabolism	0	0	1000	0	2	oxidoreduction incomplete reaction (donor unidentified)	reaction added for gap filling
r889	SACE_5951precorrin-3B C17-methyltransferase	copre3[c] + amet[c] => copre4[c] + ahcys[c]	(SACE_5951) or (SACE_5960)	SACE_5951,SACE_5960		Porphyrin and chlorophyll metabolism	0	0	1000	0	2	2.1.1.130 2.1.1.131
r890	precorrin-4 C11-methyltransferase	copre4[c] + amet[c] => copre5a[c] + ahcys[c]	(SACE_5945)	SACE_5945		Porphyrin and chlorophyll metabolism	0	0	1000	0	2	2.1.1.271
r891	cobalamin biosynthesis protein CbiG / precorrin-3B C17-methyltransferase	copre5a[c] + H2O[c] => copre5b[c] + Acetaldehyde[c]				Porphyrin and chlorophyll metabolism	0	0	1000	0	2	3.7.1.12	reaction added for gap filling
r892	cobalt-precorrin-6A synthase [SP:tr:A4FM57_SACEN]	copre5b[c] + amet[c] => copre6[c] + ahcys[c]	(SACE_5949)	SACE_5949		Porphyrin and chlorophyll metabolism	0	0	1000	0	2	2.1.1.195
r893	precorrin-6A reductase	copre6[c] + NADPH[c] + H[c] => codhpre6[c] + NADP[c]	(SACE_5950)	SACE_5950		Porphyrin and chlorophyll metabolism	0	0	1000	0	2	1.3.1.106
r894	precorrin-6Y C5,15-methyltransferase	codhpre6[c] + amet[c] => copre7[c] + ahcys[c]				Porphyrin and chlorophyll metabolism	0	0	1000	0	2	2.1.1.196	reaction added for gap filling
r895	precorrin-8W decarboxylase	copre7[c] + amet[c] => copre8[c] + ahcys[c] + CO2[c]				Porphyrin and chlorophyll metabolism	0	0	1000	0	2	2.1.1.289	reaction added for gap filling
r896	precorrin-8X methylmutase	copre8[c] => Cobyrinate[c]	(SACE_5952)	SACE_5952		Porphyrin and chlorophyll metabolism	0	0	1000	0	2	5.4.99.60
r897	cobyrinate:L-glutamine amido-ligase (ADP-forming)	Cobyrinate[c] + 2 L-Glutamine[c] + 2 ATP[c] + 2 H2O[c] => co2dam[c] + 2 L-Glutamate[c] + 2 ADP[c] + 2 Orthophosphate[c]				Porphyrin and chlorophyll metabolism	0	0	1000	0	2	1.16.8.1
r898	uroporphyrinogen decarboxylase (partial match)	uppg1[c] => cpppg1[c] + 4 CO2[c]	(SACE_1836)	SACE_1836		Porphyrin and chlorophyll metabolism	0	0	1000	0	2	4.1.1.37
r899	SACE_1606light-dependent protochlorophyllide reductase	Protochlorophyllide[c] + NADPH[c] + H[c] => Chlorophyllide[c] + NADP[c]	(SACE_1606) or (SACE_1627)	SACE_1606,SACE_1627		Porphyrin and chlorophyll metabolism	0	0	1000	0	2	1.3.1.33
r900	SACE_1606light-dependent protochlorophyllide reductase	Divinylprotochlorophyllide[c] + NADPH[c] + H[c] => dvchlda[c] + NADP[c]	(SACE_1606) or (SACE_1627)	SACE_1606,SACE_1627		Porphyrin and chlorophyll metabolism	0	0	1000	0	2	1.3.1.33
r901	isochorismate synthase DhbC	Chorismate[c] <=> Isochorismate[c]	(SACE_3854) or (SACE_6911)	SACE_3854,SACE_6911		Ubiquinone biosynthesis	1	-1000	1000	0	2	5.4.4.2
r902	2-succinyl-6-hydroxy-2,4-cyclohexadiene-1-carboxy late synthase/2-oxoglutarate decarboxylase	Isochorismate[c] + 2-Oxoglutarate[c] => 2sephchc[c] + CO2[c]	(SACE_6913)	SACE_6913		Ubiquinone biosynthesis	0	0	1000	0	2	2.2.1.9
r903	2-succinyl-6-hydroxy-2,4-cyclohexadiene-1-carboxylate synthase	2sephchc[c] => (1R,6R)-6-Hydroxy-2-succinylcyclohexa-2,4-diene-1-carboxylate[c] + Pyruvate[c]				Ubiquinone biosynthesis	0	0	1000	0	2	4.2.99.20	reaction added for ubiquinone metabolism
r904	O-succinylbenzoate synthase	(1R,6R)-6-Hydroxy-2-succinylcyclohexa-2,4-diene-1-carboxylate[c] => 2-Succinylbenzoate[c] + H2O[c]	(SACE_0541)	SACE_0541		Ubiquinone biosynthesis	0	0	1000	0	2	4.2.1.113
r905	O-succinylbenzoic acid--CoA ligase	ATP[c] + 2-Succinylbenzoate[c] + CoA[c] => AMP[c] + Diphosphate[c] + 2-Succinylbenzoyl-CoA[c]	(SACE_6916)	SACE_6916		Ubiquinone biosynthesis	0	0	1000	0	2	6.2.1.26
r906	naphthoate synthase	2-Succinylbenzoyl-CoA[c] => 1,4-Dihydroxy-2-naphthoyl-CoA[c] + H2O[c]	(SACE_6914)	SACE_6914		Ubiquinone biosynthesis	0	0	1000	0	2	4.1.3.36
r907		1,4-Dihydroxy-2-naphthoyl-CoA[c] + H2O[c] => 1,4-Dihydroxy-2-naphthoate[c] + CoA[c]				Ubiquinone biosynthesis	0	0	1000	0	2	3.1.2.28	reaction added for ubiquinone metabolism
r908	1,4-dihydroxy-2-naphthoate octaprenyltransferase	1,4-Dihydroxy-2-naphthoate[c] + octdp[c] => 2-Demethylmenaquinone[c] + Diphosphate[c] + CO2[c]	(SACE_6917)	SACE_6917		Ubiquinone biosynthesis	0	0	1000	0	2	2.5.1.74
r909	ubiquinone/menaquinone biosynthesis methyltransferase	2-Demethylmenaquinone[c] + amet[c] => Menaquinone[c] + ahcys[c]	(SACE_6904)	SACE_6904		Ubiquinone biosynthesis	0	0	1000	0	2	2.1.1.163
r910	1,4-dihydroxy-2-naphthoate octaprenyltransferase	1,4-Dihydroxy-2-naphthoate[c] + pdp[c] => 2-Phytyl-1,4-naphthoquinone[c] + CO2[c] + Diphosphate[c]	(SACE_6917)	SACE_6917		Ubiquinone biosynthesis	0	0	1000	0	2	2.5.1.-
r911	ubiquinone/menaquinone biosynthesis methyltransferase	2-Phytyl-1,4-naphthoquinone[c] + amet[c] => Phylloquinone[c] + ahcys[c]	(SACE_6904)	SACE_6904		Ubiquinone biosynthesis	0	0	1000	0	2	2.1.1.163
r912	phenylacrylic acid decarboxylase-like protein	3-Octaprenyl-4-hydroxybenzoate[c] => 2-Octaprenylphenol[c] + CO2[c]	(SACE_2086)	SACE_2086		Ubiquinone biosynthesis	0	0	1000	0	2	4.1.1.98
r913	ubiquinone/menaquinone biosynthesis methyltransferase	2-Octaprenyl-6-methoxy-1,4-benzoquinone[c] + amet[c] => 2-Octaprenyl-3-methyl-6-methoxy-1,4-benzoquinone[c] + ahcys[c]	(SACE_6904)	SACE_6904		Ubiquinone biosynthesis	0	0	1000	0	2	UbiE
r914	SACE_4647UbiA prenyltransferase	octdp[c] + 4-Hydroxybenzoate[c] <=> 3-Octaprenyl-4-hydroxybenzoate[c] + Diphosphate[c]	(SACE_4647)	SACE_4647		Ubiquinone biosynthesis	1	-1000	1000	0	2	2.5.1.-
r915	putative dihydroxyacetone (glycerone) kinase protein	ATP[c] + Glycerone[c] => ADP[c] + dhap[c]	(SACE_4765) or (SACE_5217) or (SACE_5291 and SACE_6247 and SACE_6248)	SACE_4765,SACE_5217,SACE_5291,SACE_6247,SACE_6248		Methane metabolism	0	0	1000	0	2	2.7.1.29
r916	acetyl-CoA synthetase	ATP[c] + Acetate[c] + CoA[c] => AMP[c] + Diphosphate[c] + Acetyl-CoA[c]	(SACE_0337) or (SACE_2375) or (SACE_2408) or (SACE_2851) or (SACE_3902) or (SACE_4729)	SACE_0337,SACE_2375,SACE_2408,SACE_2851,SACE_3902,SACE_4729		Methane metabolism	0	0	1000	0	2	6.2.1.1
r917	quinoprotein ethanol dehydrogenase precursor	focytC[c] + Formaldehyde[c] => cytcc[c] + Formate[c]	(SACE_4449)	SACE_4449		Methane metabolism	0	0	1000	0	2	1.1.99.8
r918	FO synthase	34hpp[c] + 5-Amino-6-(1-D-ribitylamino)uracil[c] + 2 amet[c] + H2O[c] => ddhrb[c] + 2 L-Methionine[c] + 2 5'-Deoxyadenosine[c] + Oxalate[c] + NH3[c]	(SACE_6594)	SACE_6594		Methane metabolism	0	0	1000	0	2	2.5.1.77
r919	2-phospho-L-lactate guanylyltransferase	(2S)-2-Phospholactate[c] + GTP[c] => lppg[c] + Diphosphate[c]	(SACE_6139)	SACE_6139		Methane metabolism	0	0	1000	0	2	2.7.7.68
r920	LPPG:FO 2-phospho-L-lactate transferase	ddhrb[c] + lppg[c] => f420_0[c] + GMP[c]	(SACE_6466)	SACE_6466		Methane metabolism	0	0	1000	0	2	2.7.8.28
r921	coenzyme F420-0:L-glutamate ligase	f420_0[c] + GTP[c] + L-Glutamate[c] => f420_1[c] + GDP[c] + Orthophosphate[c]	(SACE_6467)	SACE_6467		Methane metabolism	0	0	1000	0	2	6.3.2.3
r922	coenzyme F420-1 ligase	f420_1[c] + GTP[c] + L-Glutamate[c] => f420[c] + GDP[c] + Orthophosphate[c]	(SACE_6467)	SACE_6467		Methane metabolism	0	0	1000	0	2	6.3.2.34
r923	serine hydroxymethyltransferase	L-Serine[c] + h4mpt[c] => 5,10-Methylenetetrahydromethanopterin[c] + Glycine[c] + H2O[c]	(SACE_4495) or (SACE_5702)	SACE_4495,SACE_5702		Methane metabolism	0	0	1000	0	2	2.1.2.1
r924	carbon-monoxide,water:ferredoxin oxidoreductase	CO[c] + H2O[c] + fdxox[c] <=> CO2[c] + fdxrd[c]	(SACE_0536 and SACE_0537 and SACE_0538 and SACE_1160 and SACE_1161 and SACE_1162 and SACE_4017 and SACE_4018 and SACE_4019 and SACE_4020 and SACE_4873 and SACE_4874 and SACE_5140)	SACE_0536,SACE_0537,SACE_0538,SACE_1160,SACE_1161,SACE_1162,SACE_4017,SACE_4018,SACE_4019,SACE_4020,SACE_4873,SACE_4874,SACE_5140		Methane metabolism	1	-1000	1000	0	2	1.2.7.4
r925	NAD+ oxidoreductase	Formaldehyde[c] + NAD[c] + H2O[c] => Formate[c] + NADH[c] + H[c]	(SACE_6562)	SACE_6562		Methane metabolism	0	0	1000	0	2	1.2.1.46
r926	methanol:N,N-dimethyl-4-nitrosoaniline oxidoreductase	2 Formaldehyde[c] + H2O[c] => Formate[c] + Methanol[c]	(SACE_2386)	SACE_2386		Methane metabolism	0	0	1000	0	2	1.2.98.1
r927	quinoprotein ethanol dehydrogenase precursor	Methanol[c] + 2 ficytC[c] => Formaldehyde[c] + 2 focytC[c] + 2 H[c]	(SACE_4449)	SACE_4449		Methane metabolism	0	0	1000	0	2	1.1.2.7
r928	catalase	Methanol[c] + H2O2[c] <=> Formaldehyde[c] + 2 H2O[c]	(SACE_0302) or (SACE_3861) or (SACE_4668)	SACE_0302,SACE_3861,SACE_4668		Methane metabolism	1	-1000	1000	0	2	1.11.1.6
r929	SACE_2863f420-dependent N(5),N(10)-methylenetetrahydromethanopterin reductase	5,10-Methylenetetrahydromethanopterin[c] + f420r[c] => 5-Methyl-5,6,7,8-tetrahydromethanopterin[c] + f420[c]	(SACE_2863)	SACE_2863		Methane metabolism	0	0	1000	0	2	1.5.98.2
r930	SACE_1671PheA/TfdB family FAD-binding monooxygenase	Trimethylamine[c] + NADH[c] + H[c] + O2[c] => tmao[c] + NAD[c] + H2O[c]	(SACE_1671) or (SACE_3584) or (SACE_6561)	SACE_1671,SACE_3584,SACE_6561		Methane metabolism	0	0	1000	0	2	1.14.13.-
r931	SACE_3800assimilatory nitrate reductase catalytic subunit	Nitrate[c] + 2 focytC[c] + 2 H[c] <=> 2 ficytC[c] + Nitrite[c] + H2O[c]	(SACE_3800 and SACE_3801 and SACE_4067 and SACE_4068 and SACE_4069 and SACE_4070 and SACE_4911) or (SACE_3800 and SACE_4067 and SACE_4068 and SACE_4069 and SACE_4070 and SACE_4912)	SACE_3800,SACE_3801,SACE_4067,SACE_4068,SACE_4069,SACE_4070,SACE_4911,SACE_3800,SACE_4067,SACE_4068,SACE_4069,SACE_4070,SACE_4912		Nitrogen metabolism	1	-1000	1000	0	2	1.7.99.4
r932	nitrite:quinone oxidoreductase	Nitrate[c] + Hydroquinone[c] => Nitrite[c] + Quinone[c] + H2O[c]	(SACE_4067 and SACE_4068 and SACE_4069 and SACE_4070)	SACE_4067,SACE_4068,SACE_4069,SACE_4070		Nitrogen metabolism	0	0	1000	0	2	1.7.5.1
r933	assimilatory nitrite reductase large subunit	Nitrite[c] + 3 NADH[c] + 3 H[c] => NH3[c] + 3 NAD[c] + 2 H2O[c]	(SACE_3802 and SACE_3803 and SACE_4910)	SACE_3802,SACE_3803,SACE_4910		Nitrogen metabolism	0	0	1000	0	2	1.7.1.15
r934	SACE_1932formamidase	Formamide[c] + H2O[c] <=> Formate[c] + NH3[c]	(SACE_1932)	SACE_1932		Nitrogen metabolism	1	-1000	1000	0	2	3.5.1.49
r935	SACE_0433plant-type carbonic anhydrase	CO2[c] + H2O[c] => HCO3[c] + H[c]	(SACE_0433 and SACE_2046)	SACE_0433,SACE_2046		Nitrogen metabolism	0	0	1000	0	2	4.2.1.1
r936	2-nitropropane dioxygenase	O2[c] + 2 2-Nitropropane[c] <=> 2 Acetone[c] + 2 Nitrite[c]	(SACE_1450)	SACE_1450		Nitrogen metabolism	1	-1000	1000	0	2	1.13.12.16
r937	assimilatory nitrite reductase large subunit	Nitrite[c] + 3 NADPH[c] + 3 H[c] => NH4OH[c] + 3 NADP[c] + H2O[c]	(SACE_3801 and SACE_3800 and SACE_4067 and SACE_4068 and SACE_4069 and SACE_4070 and SACE_4911) or (SACE_3802 and SACE_3803 and SACE_4910)	SACE_3801,SACE_3800,SACE_4067,SACE_4068,SACE_4069,SACE_4070,SACE_4911,SACE_3802,SACE_3803,SACE_4910		Nitrogen metabolism	0	0	1000	0	2	1.7.1.4
r938	ferredoxin--nitrite reductase	Nitrite[c] + 6 fdxrd[c] + 6 H[c] => NH3[c] + 2 H2O[c] + 6 fdxox[c]	(SACE_1476)	SACE_1476		Nitrogen metabolism	0	0	1000	0	2	1.7.7.1
r939	SACE_1163nitrate reductase (NADH)	Nitrate[c] + NADH[c] + H[c] => Nitrite[c] + NAD[c] + H2O[c]	(SACE_1163)	SACE_1163		Nitrogen metabolism	0	0	1000	0	2	1.7.1.1
r940	SACE_5617aminomethyltransferase	mlthf[c] + NH3[c] + CO2[c] + NADH[c] + H[c] => Glycine[c] + Tetrahydrofolate[c] + NAD[c]	(SACE_5617) or (SACE_5701)	SACE_5617,SACE_5701		Nitrogen metabolism	0	0	1000	0	2	2.1.2.10
r941	D-amino-acid dehydrogenase small subunit	2-Oxocarboxylate[c] + NH3[c] + acceptor(reduced)[c] => alpha-aa[c] + H2O[c] + Acceptor[c]	(SACE_4702 and SACE_5427)	SACE_4702,SACE_5427		Nitrogen metabolism	0	0	1000	0	2	1.4.99.6
r942	Hydrogen-sulfide:ferredoxin oxidoreductase	Sulfite[c] + 6 fdxrd[c] + 6 H[c] => h2s[c] + 6 fdxox[c] + 3 H2O[c]	(SACE_1476)	SACE_1476		Sulfur metabolism	0	0	1000	0	2	1.8.7.1
r943	thiosulfate:cyanide sulfurtranserase	Thiosulfate[c] + CN[c] => Sulfite[c] + Thiocyanate[c]	(SACE_1777) or (SACE_7106)	SACE_1777,SACE_7106		Sulfur metabolism	0	0	1000	0	2	2.8.1.1
r944	SACE_3290taurine catabolism dioxygenase TauD	Taurine[c] + 2-Oxoglutarate[c] + O2[c] => Sulfite[c] + Aminoacetaldehyde[c] + Succinate[c] + CO2[c]	(SACE_3290) or (SACE_4651)	SACE_3290,SACE_4651		Sulfur metabolism	0	0	1000	0	2	1.14.11.17
r945	SACE_3527sulfate adenylyltranferase, aps kinase	ATP[c] + Sulfate[c] <=> Diphosphate[c] + aps[c]	(SACE_3527 and SACE_3531 and SACE_1473 and SACE_1474 and SACE_3530)	SACE_3527,SACE_3531,SACE_1473,SACE_1474,SACE_3530		Sulfur metabolism	1	-1000	1000	0	2	2.7.7.4
r946	SACE_3527sulfate adenylyltranferase, aps kinase	ATP[c] + aps[c] => ADP[c] + paps[c]	(SACE_3527 and SACE_3531 and SACE_1473 and SACE_1474 and SACE_3530)	SACE_3527,SACE_3531,SACE_1473,SACE_1474,SACE_3530		Sulfur metabolism	0	0	1000	0	2	2.7.1.25
r947	3'(2'), 5'-bisphosphate nucleotidase	paps[c] + H2O[c] => aps[c] + Orthophosphate[c]	(SACE_3529)	SACE_3529		Sulfur metabolism	0	0	1000	0	2	3.1.3.7
r948	phosphoadenosine phosphosulfate reductase	Thioredoxin[c] + paps[c] => trdds[c] + Sulfite[c] + pap[c]	(SACE_1475)	SACE_1475		Sulfur metabolism	0	0	1000	0	2	1.8.4.8
r949	cystathionine gamma-synthase	suchms[c] + L-Cysteine[c] => Cystathionine[c] + Succinate[c]	(SACE_0902)	SACE_0902		Sulfur metabolism	0	0	1000	0	2	2.5.1.48
r950	SACE_0028acetyl-CoA carboxylase	ATP[c] + Holo-carboxylase[c] + HCO3[c] => ADP[c] + Orthophosphate[c] + cbtnCCP[c]	(SACE_0026 and SACE_0027 and SACE_0028 and SACE_3400 and SACE_3856 and SACE_6509 and SACE_7038) or (SACE_3154) or (SACE_4237)	SACE_0026,SACE_0027,SACE_0028,SACE_3400,SACE_3856,SACE_6509,SACE_7038,SACE_3154,SACE_4237		fa biosynthesis	0	0	1000	0	2	6.3.4.14 6.4.1.2
r951	ACP S-malonyltransferase	Malonyl-CoA[c] + ACP[c] <=> CoA[c] + Malonyl-ACP[c]	(SACE_1526)	SACE_1526		fa biosynthesis	1	-1000	1000	0	2	FabD sen00061.gene
r952	3-oxoacyl-[acyl-carrier-protein] synthase III	Acetyl-CoA[c] + Malonyl-ACP[c] => Acetoacetyl-ACP[c] + CoA[c] + CO2[c]	(SACE_1525) or (SACE_3466) or (SACE_5307) or (SACE_5540)	SACE_1525,SACE_3466,SACE_5307,SACE_5540		fa biosynthesis	0	0	1000	0	2	FabH
r953	3-oxoacyl-ACP synthase	Acetyl-ACP[c] + Malonyl-ACP[c] => Acetoacetyl-ACP[c] + ACP[c] + CO2[c]	(SACE_1523) or (SACE_4133) or (SACE_5538) or (SACE_1525) or (SACE_3466) or (SACE_5307) or (SACE_5540)	SACE_1523,SACE_4133,SACE_5538,SACE_1525,SACE_3466,SACE_5307,SACE_5540		fa biosynthesis	0	0	1000	0	2	FabF sen00061.gene
r954	SACE_22063-ketoacyl-(ACP) reductase	Acetoacetyl-ACP[c] + NADPH[c] + H[c] <=> (3R)-3-Hydroxybutanoyl-ACP[c] + NADP[c]	(SACE_2206) or (SACE_2735) or (SACE_3681) or (SACE_3687) or (SACE_3787) or (SACE_4013) or (SACE_4805) or (SACE_5381) or (SACE_5392) or (SACE_7303)	SACE_2206,SACE_2735,SACE_3681,SACE_3687,SACE_3787,SACE_4013,SACE_4805,SACE_5381,SACE_5392,SACE_7303		fa biosynthesis	1	-1000	1000	0	2	1.1.1.100
r955	(3R)-3-Hydroxybutanoyl-ACP hydro-lyase	(3R)-3-Hydroxybutanoyl-ACP[c] <=> But-2-enoyl-ACP[c] + H2O[c]				fa biosynthesis	1	-1000	1000	0	2	4.2.1.58	reaction added to complete fa synthase (hydrolase) activity
r956	Butyryl-ACP:malonyl-CoA C-acyltransferase（decarboxylating, oxoacyl- and enoyl-reducing)	But-2-enoyl-ACP[c] + NADH[c] + H[c] <=> Butyryl-ACP[c] + NAD[c]	(SACE_3786)	SACE_3786		fa biosynthesis	1	-1000	1000	0	2	2.3.1.86	reaction added to complete fa synthase (acyltransferase) activity-In kegg but no in list
r957	3-oxoacyl-ACP synthase	Butyryl-ACP[c] + Malonyl-ACP[c] => 3-Oxohexanoyl-ACP[c] + CO2[c] + ACP[c]	(SACE_1523) or (SACE_4133) or (SACE_5538)	SACE_1523,SACE_4133,SACE_5538		fa biosynthesis	0	0	1000	0	2	FabF sen00061.gene
r958	SACE_22063-ketoacyl-(ACP) reductase	3-Oxohexanoyl-ACP[c] + NADPH[c] + H[c] <=> (R)-3-Hydroxyhexanoyl-ACP[c] + NADP[c]	(SACE_2206) or (SACE_2735) or (SACE_3681) or (SACE_3687) or (SACE_3787) or (SACE_4013) or (SACE_4805) or (SACE_5381) or (SACE_5392) or (SACE_7303)	SACE_2206,SACE_2735,SACE_3681,SACE_3687,SACE_3787,SACE_4013,SACE_4805,SACE_5381,SACE_5392,SACE_7303		fa biosynthesis	1	-1000	1000	0	2	1.1.1.100
r959	(3R)-3-Hydroxybutanoyl-ACP hydro-lyase	(R)-3-Hydroxyhexanoyl-ACP[c] <=> trans-Hex-2-enoyl-ACP[c] + H2O[c]				fa biosynthesis	1	-1000	1000	0	2	4.2.1.59	reaction added to complete fa synthase (hydrolase) activity
r960	Hexanoyl-ACP:malonyl-CoA C-acyltransferase（decarboxylating, oxoacyl- and enoyl-reducing)	trans-Hex-2-enoyl-ACP[c] + NADH[c] + H[c] <=> Hexanoyl-ACP[c] + NAD[c]	(SACE_3786)	SACE_3786		fa biosynthesis	1	-1000	1000	0	2	1.3.1.9 2.3.1.86	reaction added to complete fa synthase (acyltransferase) activity-In kegg but no in list
r961	3-oxoacyl-ACP synthase	Hexanoyl-ACP[c] + Malonyl-ACP[c] => 3-Oxooctanoyl-ACP[c] + CO2[c] + ACP[c]	(SACE_1523) or (SACE_4133) or (SACE_5538)	SACE_1523,SACE_4133,SACE_5538		fa biosynthesis	0	0	1000	0	2	FabF sen00061.gene
r962	SACE_22063-ketoacyl-(ACP) reductase	3-Oxooctanoyl-ACP[c] + NADPH[c] + H[c] <=> (3R)-3-Hydroxyoctanoyl-ACP[c] + NADP[c]	(SACE_2206) or (SACE_2735) or (SACE_3681) or (SACE_3687) or (SACE_3787) or (SACE_4013) or (SACE_4805) or (SACE_5381) or (SACE_5392) or (SACE_7303)	SACE_2206,SACE_2735,SACE_3681,SACE_3687,SACE_3787,SACE_4013,SACE_4805,SACE_5381,SACE_5392,SACE_7303		fa biosynthesis	1	-1000	1000	0	2	1.1.1.100
r963	(3R)-3-Hydroxybutanoyl-ACP hydro-lyase	(3R)-3-Hydroxyoctanoyl-ACP[c] <=> trans-Oct-2-enoyl-ACP[c] + H2O[c]				fa biosynthesis	1	-1000	1000	0	2	4.2.1.60	reaction added to complete fa synthase (hydrolase) activity
r964	Octanoyl-ACP:malonyl-CoA C-acyltransferase（decarboxylating, oxoacyl- and enoyl-reducing)	trans-Oct-2-enoyl-ACP[c] + NADH[c] + H[c] <=> Octanoyl-ACP[c] + NAD[c]	(SACE_3786)	SACE_3786		fa biosynthesis	1	-1000	1000	0	2	1.3.1.9 2.3.1.86	reaction added to complete fa synthase (acyltransferase) activity-In kegg but no in list
r965	octanoyl-[acyl-carrier protein] hydrolase	Octanoyl-ACP[c] + H2O[c] => ACP[c] + Octanoic-acid[c]	(SACE_2628) or (SACE_3258) or (SACE_4275) or (SACE_4286)	SACE_2628,SACE_3258,SACE_4275,SACE_4286		fa biosynthesis	0	0	1000	0	2	3.1.2.21
r966	3-oxoacyl-ACP synthase	Octanoyl-ACP[c] + Malonyl-ACP[c] => 3-Oxodecanoyl-ACP[c] + CO2[c] + ACP[c]	(SACE_1523) or (SACE_4133) or (SACE_5538)	SACE_1523,SACE_4133,SACE_5538		fa biosynthesis	0	0	1000	0	2	FabF sen00061.gene
r967	SACE_22063-ketoacyl-(ACP) reductase	3-Oxodecanoyl-ACP[c] + NADPH[c] <=> (3R)-3-Hydroxydecanoyl-ACP[c] + NADP[c]	(SACE_2206) or (SACE_2735) or (SACE_3681) or (SACE_3687) or (SACE_3787) or (SACE_4013) or (SACE_4805) or (SACE_5381) or (SACE_5392) or (SACE_7303)	SACE_2206,SACE_2735,SACE_3681,SACE_3687,SACE_3787,SACE_4013,SACE_4805,SACE_5381,SACE_5392,SACE_7303		fa biosynthesis	1	-1000	1000	0	2	1.1.1.100
r968	(3R)-3-Hydroxybutanoyl-ACP hydro-lyase	(3R)-3-Hydroxydecanoyl-ACP[c] <=> trans-Dec-2-enoyl-ACP[c] + H2O[c]				fa biosynthesis	1	-1000	1000	0	2	4.2.1.61	reaction added to complete fa synthase (hydrolase) activity
r969	Decanoyl-ACP:malonyl-CoA C-acyltransferase（decarboxylating, oxoacyl- and enoyl-reducing)	trans-Dec-2-enoyl-ACP[c] + NADH[c] + H[c] <=> Decanoyl-ACP[c] + NAD[c]	(SACE_3786)	SACE_3786		fa biosynthesis	1	-1000	1000	0	2	1.3.1.9 2.3.1.86	reaction added to complete fa synthase (acyltransferase) activity-In kegg but no in list
r970	decanoyl-[acyl-carrier protein] hydrolase	Decanoyl-ACP[c] + H2O[c] => ACP[c] + Decanoic-acid[c]	(SACE_2628) or (SACE_3258) or (SACE_4275) or (SACE_4286)	SACE_2628,SACE_3258,SACE_4275,SACE_4286		fa biosynthesis	0	0	1000	0	2	3.1.2.21
r971	3-oxoacyl-ACP synthase	Decanoyl-ACP[c] + Malonyl-ACP[c] => 3-Oxododecanoyl-ACP[c] + CO2[c] + ACP[c]	(SACE_1523) or (SACE_4133) or (SACE_5538)	SACE_1523,SACE_4133,SACE_5538		fa biosynthesis	0	0	1000	0	2	FabF sen00061.gene
r972	SACE_22063-ketoacyl-(ACP) reductase	3-Oxododecanoyl-ACP[c] + NADPH[c] + H[c] <=> (R)-3-Hydroxydodecanoyl-ACP[c] + NADP[c]	(SACE_2206) or (SACE_2735) or (SACE_3681) or (SACE_3687) or (SACE_3787) or (SACE_4013) or (SACE_4805) or (SACE_5381) or (SACE_5392) or (SACE_7303)	SACE_2206,SACE_2735,SACE_3681,SACE_3687,SACE_3787,SACE_4013,SACE_4805,SACE_5381,SACE_5392,SACE_7303		fa biosynthesis	1	-1000	1000	0	2	1.1.1.100
r973	(3R)-3-Hydroxybutanoyl-ACP hydro-lyase	(R)-3-Hydroxydodecanoyl-ACP[c] <=> trans-Dodec-2-enoyl-ACP[c] + H2O[c]				fa biosynthesis	1	-1000	1000	0	2	4.2.1.62	reaction added to complete fa synthase (hydrolase) activity
r974	Dodecanoyl-ACP:malonyl-CoA C-acyltransferase（decarboxylating, oxoacyl- and enoyl-reducing)	trans-Dodec-2-enoyl-ACP[c] + NADH[c] + H[c] <=> Dodecanoyl-ACP[c] + NAD[c]	(SACE_3786)	SACE_3786		fa biosynthesis	1	-1000	1000	0	2	1.3.1.9 2.3.1.86	reaction added to complete fa synthase (acyltransferase) activity-In kegg but no in list
r975	SACE_2628thioesterase involved in non-ribosomal peptide biosynthesis	Dodecanoyl-ACP[c] + H2O[c] => ACP[c] + ddca[c]	(SACE_2628) or (SACE_3258) or (SACE_4275) or (SACE_4286)	SACE_2628,SACE_3258,SACE_4275,SACE_4286		fa biosynthesis	0	0	1000	0	2	3.1.2.14
r976	3-oxoacyl-ACP synthase	Dodecanoyl-ACP[c] + Malonyl-ACP[c] => 3-Oxotetradecanoyl-ACP[c] + CO2[c] + ACP[c]	(SACE_1523) or (SACE_4133) or (SACE_5538)	SACE_1523,SACE_4133,SACE_5538		fa biosynthesis	0	0	1000	0	2	FabF sen00061.gene
r977	SACE_22063-ketoacyl-(ACP) reductase	3-Oxotetradecanoyl-ACP[c] + NADPH[c] + H[c] <=> (3R)-3-Hydroxytetradecanoyl-ACP[c] + NADP[c]	(SACE_2206) or (SACE_2735) or (SACE_3681) or (SACE_3687) or (SACE_3787) or (SACE_4013) or (SACE_4805) or (SACE_5381) or (SACE_5392) or (SACE_7303)	SACE_2206,SACE_2735,SACE_3681,SACE_3687,SACE_3787,SACE_4013,SACE_4805,SACE_5381,SACE_5392,SACE_7303		fa biosynthesis	1	-1000	1000	0	2	1.1.1.100
r978	(3R)-3-Hydroxybutanoyl-ACP hydro-lyase	(3R)-3-Hydroxytetradecanoyl-ACP[c] <=> trans-Tetradec-2-enoyl-ACP[c] + H2O[c]				fa biosynthesis	1	-1000	1000	0	2	4.2.1.63	reaction added to complete fa synthase (hydrolase) activity
r979	Tetradecanoyl-ACP:malonyl-CoA C-acyltransferase（decarboxylating, oxoacyl- and enoyl-reducing)	trans-Tetradec-2-enoyl-ACP[c] + NADH[c] + H[c] <=> Tetradecanoyl-ACP[c] + NAD[c]	(SACE_3786)	SACE_3786		fa biosynthesis	1	-1000	1000	0	2	1.3.1.9 2.3.1.86	reaction added to complete fa synthase (acyltransferase) activity-In kegg but no in list
r980	SACE_2628thioesterase involved in non-ribosomal peptide biosynthesis	Tetradecanoyl-ACP[c] + H2O[c] <=> ACP[c] + ttdca[c]	(SACE_2628) or (SACE_3258) or (SACE_4275) or (SACE_4286)	SACE_2628,SACE_3258,SACE_4275,SACE_4286		fa biosynthesis	1	-1000	1000	0	2	3.1.2.14
r981	3-oxoacyl-ACP synthase	Tetradecanoyl-ACP[c] + Malonyl-ACP[c] => 3-Oxohexadecanoyl-ACP[c] + CO2[c] + ACP[c]	(SACE_1523) or (SACE_4133) or (SACE_5538)	SACE_1523,SACE_4133,SACE_5538		fa biosynthesis	0	0	1000	0	2	FabF sen00061.gene
r982	SACE_22063-ketoacyl-(ACP) reductase	3-Oxohexadecanoyl-ACP[c] + NADPH[c] + H[c] <=> (3R)-3-Hydroxypalmitoyl-ACP[c] + NADP[c]	(SACE_2206) or (SACE_2735) or (SACE_3681) or (SACE_3687) or (SACE_3787) or (SACE_4013) or (SACE_4805) or (SACE_5381) or (SACE_5392) or (SACE_7303)	SACE_2206,SACE_2735,SACE_3681,SACE_3687,SACE_3787,SACE_4013,SACE_4805,SACE_5381,SACE_5392,SACE_7303		fa biosynthesis	1	-1000	1000	0	2	1.1.1.100
r983	(3R)-3-Hydroxybutanoyl-ACP hydro-lyase	(3R)-3-Hydroxypalmitoyl-ACP[c] <=> trans-Hexadec-2-enoyl-ACP[c] + H2O[c]				fa biosynthesis	1	-1000	1000	0	2	4.2.1.64	reaction added to complete fa synthase (hydrolase) activity
r984	Hexadecanoyl-ACP:malonyl-CoA C-acyltransferase（decarboxylating, oxoacyl- and enoyl-reducing)	trans-Hexadec-2-enoyl-ACP[c] + NADH[c] + H[c] <=> Hexadecanoyl-ACP[c] + NAD[c]	(SACE_3786)	SACE_3786		fa biosynthesis	1	-1000	1000	0	2	1.3.1.9 2.3.1.86	reaction added to complete fa synthase (acyltransferase) activity-In kegg but no in list
r985	SACE_2628thioesterase involved in non-ribosomal peptide biosynthesis	Hexadecanoyl-ACP[c] + H2O[c] => ACP[c] + hdca[c]	(SACE_2628) or (SACE_3258) or (SACE_4275) or (SACE_4286)	SACE_2628,SACE_3258,SACE_4275,SACE_4286		fa biosynthesis	0	0	1000	0	2	3.1.2.14
r986	acyl-CoA synthase	ATP[c] + hdca[c] + CoA[c] => AMP[c] + Palmitoyl-CoA[c] + Diphosphate[c]	(SACE_1193) or (SACE_1694) or (SACE_3153) or (SACE_3409) or (SACE_3444) or (SACE_3478) or (SACE_4038) or (SACE_5343) or (SACE_5393) or (SACE_6950)	SACE_1193,SACE_1694,SACE_3153,SACE_3409,SACE_3444,SACE_3478,SACE_4038,SACE_5343,SACE_5393,SACE_6950		fa biosynthesis	0	0	1000	0	2	6.2.1.3
r987	3-oxoacyl-ACP synthase	Hexadecanoyl-ACP[c] + Malonyl-ACP[c] => 3-Oxostearoyl-ACP[c] + ACP[c] + CO2[c]	(SACE_1523) or (SACE_4133) or (SACE_5538)	SACE_1523,SACE_4133,SACE_5538		fa biosynthesis	0	0	1000	0	2	FabF sen00061.gene
r988	SACE_22063-ketoacyl-（ACP) reductase	3-Oxostearoyl-ACP[c] + NADPH[c] + H[c] <=> 3-Hydroxyoctadecanoyl-ACP[c] + NADP[c]	(SACE_2206) or (SACE_2735) or (SACE_3681) or (SACE_3687) or (SACE_3787) or (SACE_4013) or (SACE_4805) or (SACE_5381) or (SACE_5392) or (SACE_7303)	SACE_2206,SACE_2735,SACE_3681,SACE_3687,SACE_3787,SACE_4013,SACE_4805,SACE_5381,SACE_5392,SACE_7303		fa biosynthesis	1	-1000	1000	0	2	1.1.1.100
r989	(3R)-3-Hydroxybutanoyl-ACP hydro-lyase	3-Hydroxyoctadecanoyl-ACP[c] <=> (2E)-Octadecenoyl-ACP[c] + H2O[c]				fa biosynthesis	1	-1000	1000	0	2	4.2.1.65	reaction added to complete fa synthase (hydrolase) activity
r990	enoyl-[acyl-carrier protein] reductase I	(2E)-Octadecenoyl-ACP[c] + NADH[c] + H[c] <=> Octadecanoyl-ACP[c] + NAD[c]	(SACE_3786)	SACE_3786		fa biosynthesis	1	-1000	1000	0	2	1.3.1.9 2.3.1.86	reaction added to complete fa synthase (acyltransferase) activity-In kegg but no in list
r991	SACE_2628thioesterase involved in non-ribosomal peptide biosynthesis	Octadecanoyl-ACP[c] + H2O[c] <=> ACP[c] + ocdca[c]	(SACE_2628) or (SACE_3258) or (SACE_4275) or (SACE_4286)	SACE_2628,SACE_3258,SACE_4275,SACE_4286		fa biosynthesis	1	-1000	1000	0	2	3.1.2.14
r992	SACE_15253-oxoacyl-(ACP) synthase III	Acetyl-CoA[c] + ACP[c] <=> CoA[c] + Acetyl-ACP[c]	(SACE_1525) or (SACE_3466) or (SACE_5307) or (SACE_5540)	SACE_1525,SACE_3466,SACE_5307,SACE_5540		fa biosynthesis	1	-1000	1000	0	2	2.3.1.180
r993	SACE_2628thioesterase involved in non-ribosomal peptide biosynthesis	Oleoyl-ACP[c] + H2O[c] <=> ACP[c] + (9Z)-ocdce[c]	(SACE_2628) or (SACE_3258) or (SACE_4275) or (SACE_4286)	SACE_2628,SACE_3258,SACE_4275,SACE_4286		fa biosynthesis	1	-1000	1000	0	2	3.1.2.14
r994	lumped reaction	Propanoyl-CoA[c] + 6 Malonyl-ACP[c] + 6 NADH[c] + 12 H[c] + 6 NADPH[c] <=> CoA[c] + 6 CO2[c] + 6 NADP[c] + 6 H2O[c] + 6 NAD[c] + ptdca[c]				fa biosynthesis, C15	1	-1000	1000	0	2	lumped reaction	reaction added, C15 fa biosynthesis
r995	lumped reaction	Propanoyl-CoA[c] + 7 Malonyl-ACP[c] + 7 NADH[c] + 14 H[c] + 7 NADPH[c] <=> CoA[c] + 7 CO2[c] + 7 NADP[c] + 7 H2O[c] + 7 NAD[c] + hpdca[c]				fa biosynthesis, C17	1	-1000	1000	0	2	lumped reaction	reaction added, C17 fa biosynthesis
r996	putative acyl-CoA dehydrogenase	Palmitoyl-CoA[c] + FAD[c] => hdd2coa[c] + FADH2[c]	(SACE_2743) or (SACE_2745) or (SACE_2758) or (SACE_2850) or (SACE_3126) or (SACE_3565) or (SACE_3993) or (SACE_4125) or (SACE_5017) or (SACE_5025) or (SACE_5380) or (SACE_5537) or (SACE_5699) or (SACE_7372)	SACE_2743,SACE_2745,SACE_2758,SACE_2850,SACE_3126,SACE_3565,SACE_3993,SACE_4125,SACE_5017,SACE_5025,SACE_5380,SACE_5537,SACE_5699,SACE_7372		fa metabolism	0	0	1000	0	2	1.3.3.6 1.3.8.7 1.3.8.8
r997	putative enoyl-CoA hydratase/isomerase family protein	hdd2coa[c] + H2O[c] <=> (S)-3-Hydroxyhexadecanoyl-CoA[c]	(SACE_1458) or (SACE_3084) or (SACE_3989) or (SACE_6207) or (SACE_6362)	SACE_1458,SACE_3084,SACE_3989,SACE_6207,SACE_6362		fa metabolism	1	-1000	1000	0	2	4.2.1.17
r998	SACE_0092short-chain dehydrogenase/reductase SDR	(S)-3-Hydroxyhexadecanoyl-CoA[c] + NAD[c] <=> 3-Oxopalmitoyl-CoA[c] + NADH[c] + H[c]	(SACE_5040) or (SACE_6362)	SACE_5040,SACE_6362		fa metabolism	1	-1000	1000	0	2	1.1.1.35
r999	SACE_1824acetyl-coa acetyltransferase （thiolase)	CoA[c] + 3-Oxopalmitoyl-CoA[c] <=> Tetradecanoyl-CoA[c] + Acetyl-CoA[c]	(SACE_1824) or (SACE_3994)	SACE_1824,SACE_3994		fa metabolism	1	-1000	1000	0	2	2.3.1.16
r1000	putative acyl-CoA dehydrogenase	Tetradecanoyl-CoA[c] + FAD[c] => td2coa[c] + FADH2[c]	(SACE_2743) or (SACE_2745) or (SACE_2758) or (SACE_2850) or (SACE_3126) or (SACE_3565) or (SACE_3993) or (SACE_4125) or (SACE_5017) or (SACE_5025) or (SACE_5380) or (SACE_5537) or (SACE_5699) or (SACE_7372)	SACE_2743,SACE_2745,SACE_2758,SACE_2850,SACE_3126,SACE_3565,SACE_3993,SACE_4125,SACE_5017,SACE_5025,SACE_5380,SACE_5537,SACE_5699,SACE_7372		fa metabolism	0	0	1000	0	2	1.3.99.3
r1001	putative enoyl-CoA hydratase/isomerase family protein	td2coa[c] + H2O[c] <=> (S)-3-Hydroxytetradecanoyl-CoA[c]	(SACE_1458) or (SACE_3084) or (SACE_3989) or (SACE_6207) or (SACE_6362)	SACE_1458,SACE_3084,SACE_3989,SACE_6207,SACE_6362		fa metabolism	1	-1000	1000	0	2	4.2.1.17
r1002	SACE_0092short-chain dehydrogenase/reductase SDR	(S)-3-Hydroxytetradecanoyl-CoA[c] + NAD[c] <=> 3-Oxotetradecanoyl-CoA[c] + NADH[c]	(SACE_5040) or (SACE_6362)	SACE_5040,SACE_6362		fa metabolism	1	-1000	1000	0	2	1.1.1.35
r1003	SACE_1824acetyl-coa acetyltransferase （thiolase)	CoA[c] + 3-Oxotetradecanoyl-CoA[c] <=> Lauroyl-CoA[c] + Acetyl-CoA[c]	(SACE_1824) or (SACE_3994)	SACE_1824,SACE_3994		fa metabolism	1	-1000	1000	0	2	2.3.1.16
r1004	putative acyl-CoA dehydrogenase	Lauroyl-CoA[c] + FAD[c] => 2-trans-Dodecenoyl-CoA[c] + FADH2[c]	(SACE_2743) or (SACE_2745) or (SACE_2758) or (SACE_2850) or (SACE_3126) or (SACE_3565) or (SACE_3993) or (SACE_4125) or (SACE_5017) or (SACE_5025) or (SACE_5380) or (SACE_5537) or (SACE_5699) or (SACE_7372)	SACE_2743,SACE_2745,SACE_2758,SACE_2850,SACE_3126,SACE_3565,SACE_3993,SACE_4125,SACE_5017,SACE_5025,SACE_5380,SACE_5537,SACE_5699,SACE_7372		fa metabolism	0	0	1000	0	2	1.3.99.3 1.3.99.13
r1005	putative enoyl-CoA hydratase/isomerase family protein	2-trans-Dodecenoyl-CoA[c] + H2O[c] <=> (S)-3-Hydroxydodecanoyl-CoA[c]	(SACE_1458) or (SACE_3084) or (SACE_3989) or (SACE_6207) or (SACE_6362)	SACE_1458,SACE_3084,SACE_3989,SACE_6207,SACE_6362		fa metabolism	1	-1000	1000	0	2	4.2.1.17
r1006	SACE_0092short-chain dehydrogenase/reductase SDR	(S)-3-Hydroxydodecanoyl-CoA[c] + NAD[c] <=> 3-Oxododecanoyl-CoA[c] + NADH[c] + H[c]	(SACE_5040) or (SACE_6362)	SACE_5040,SACE_6362		fa metabolism	1	-1000	1000	0	2	1.1.1.35
r1007	SACE_1824acetyl-coa acetyltransferase (thiolase)	CoA[c] + 3-Oxododecanoyl-CoA[c] <=> Decanoyl-CoA[c] + Acetyl-CoA[c]	(SACE_1824) or (SACE_3994)	SACE_1824,SACE_3994		fa metabolism	1	-1000	1000	0	2	2.3.1.16
r1008	putative acyl-CoA dehydrogenase	Decanoyl-CoA[c] + FAD[c] => dc2coa[c] + FADH2[c]	(SACE_2743) or (SACE_2745) or (SACE_2758) or (SACE_2850) or (SACE_3126) or (SACE_3565) or (SACE_3993) or (SACE_4125) or (SACE_5017) or (SACE_5025) or (SACE_5380) or (SACE_5537) or (SACE_5699) or (SACE_7372)	SACE_2743,SACE_2745,SACE_2758,SACE_2850,SACE_3126,SACE_3565,SACE_3993,SACE_4125,SACE_5017,SACE_5025,SACE_5380,SACE_5537,SACE_5699,SACE_7372		fa metabolism	0	0	1000	0	2	1.3.99.3
r1009	putative enoyl-CoA hydratase/isomerase family protein	dc2coa[c] + H2O[c] <=> (S)-Hydroxydecanoyl-CoA[c]	(SACE_1458) or (SACE_3084) or (SACE_3989) or (SACE_6207) or (SACE_6362)	SACE_1458,SACE_3084,SACE_3989,SACE_6207,SACE_6362		fa metabolism	1	-1000	1000	0	2	4.2.1.17
r1010	SACE_0092short-chain dehydrogenase/reductase SDR	(S)-Hydroxydecanoyl-CoA[c] + NAD[c] <=> 3-Oxodecanoyl-CoA[c] + NADH[c] + H[c]	(SACE_5040) or (SACE_6362)	SACE_5040,SACE_6362		fa metabolism	1	-1000	1000	0	2	1.1.1.35
r1011	SACE_1824acetyl-coa acetyltransferase （thiolase)	CoA[c] + 3-Oxodecanoyl-CoA[c] <=> Octanoyl-CoA[c] + Acetyl-CoA[c]	(SACE_1824) or (SACE_3994)	SACE_1824,SACE_3994		fa metabolism	1	-1000	1000	0	2	2.3.1.16
r1012	putative acyl-CoA dehydrogenase	Octanoyl-CoA[c] + FAD[c] => oc2coa[c] + FADH2[c]	(SACE_2743) or (SACE_2745) or (SACE_2758) or (SACE_2850) or (SACE_3126) or (SACE_3565) or (SACE_3993) or (SACE_4125) or (SACE_5017) or (SACE_5025) or (SACE_5380) or (SACE_5537) or (SACE_5699) or (SACE_7372)	SACE_2743,SACE_2745,SACE_2758,SACE_2850,SACE_3126,SACE_3565,SACE_3993,SACE_4125,SACE_5017,SACE_5025,SACE_5380,SACE_5537,SACE_5699,SACE_7372		fa metabolism	0	0	1000	0	2	1.3.99.3 1.3.99.13
r1013	putative enoyl-CoA hydratase/isomerase family protein	oc2coa[c] + H2O[c] <=> (S)-Hydroxyoctanoyl-CoA[c]	(SACE_1458) or (SACE_3084) or (SACE_3989) or (SACE_6207) or (SACE_6362)	SACE_1458,SACE_3084,SACE_3989,SACE_6207,SACE_6362		fa metabolism	1	-1000	1000	0	2	4.2.1.17
r1014	SACE_0092short-chain dehydrogenase/reductase SDR	(S)-Hydroxyoctanoyl-CoA[c] + NAD[c] <=> 3-Oxooctanoyl-CoA[c] + NADH[c] + H[c]	(SACE_5040) or (SACE_6362)	SACE_5040,SACE_6362		fa metabolism	1	-1000	1000	0	2	1.1.1.35
r1015	SACE_1824acetyl-coa acetyltransferase (thiolase)	CoA[c] + 3-Oxooctanoyl-CoA[c] <=> Hexanoyl-CoA[c] + Acetyl-CoA[c]	(SACE_1824) or (SACE_3994)	SACE_1824,SACE_3994		fa metabolism	1	-1000	1000	0	2	2.3.1.16
r1016	putative acyl-CoA dehydrogenase	Hexanoyl-CoA[c] + FAD[c] => trans-Hex-2-enoyl-CoA[c] + FADH2[c]	(SACE_2743) or (SACE_2745) or (SACE_2758) or (SACE_2850) or (SACE_3126) or (SACE_3565) or (SACE_3993) or (SACE_4125) or (SACE_5017) or (SACE_5025) or (SACE_5380) or (SACE_5537) or (SACE_5699) or (SACE_7372)	SACE_2743,SACE_2745,SACE_2758,SACE_2850,SACE_3126,SACE_3565,SACE_3993,SACE_4125,SACE_5017,SACE_5025,SACE_5380,SACE_5537,SACE_5699,SACE_7372		fa metabolism	0	0	1000	0	2	1.3.99.3
r1017	putative enoyl-CoA hydratase/isomerase family protein	trans-Hex-2-enoyl-CoA[c] + H2O[c] <=> (S)-Hydroxyhexanoyl-CoA[c]	(SACE_1458) or (SACE_3084) or (SACE_3989) or (SACE_6207) or (SACE_6362)	SACE_1458,SACE_3084,SACE_3989,SACE_6207,SACE_6362		fa metabolism	1	-1000	1000	0	2	4.2.1.17
r1018	SACE_0092short-chain dehydrogenase/reductase SDR	(S)-Hydroxyhexanoyl-CoA[c] + NAD[c] <=> 3-Oxohexanoyl-CoA[c] + NADH[c] + H[c]	(SACE_5040) or (SACE_6362)	SACE_5040,SACE_6362		fa metabolism	1	-1000	1000	0	2	1.1.1.35
r1019	acetyl-CoA acetyltransferase	CoA[c] + 3-Oxohexanoyl-CoA[c] <=> Acetyl-CoA[c] + Butanoyl-CoA[c]	(SACE_0897) or (SACE_1192) or (SACE_1824) or (SACE_2736) or (SACE_3994) or (SACE_4011) or (SACE_6236) or (SACE_6363) or (SACE_7304)	SACE_0897,SACE_1192,SACE_1824,SACE_2736,SACE_3994,SACE_4011,SACE_6236,SACE_6363,SACE_7304		fa metabolism	1	-1000	1000	0	2	2.3.1.9
r1020	putative acyl-CoA dehydrogenase	Butanoyl-CoA[c] + FAD[c] => FADH2[c] + Crotonoyl-CoA[c]	(SACE_2743) or (SACE_2745) or (SACE_2758) or (SACE_2850) or (SACE_3126) or (SACE_3565) or (SACE_4125) or (SACE_5017) or (SACE_5025) or (SACE_5537) or (SACE_5380) or (SACE_5699) or (SACE_7372)	SACE_2743,SACE_2745,SACE_2758,SACE_2850,SACE_3126,SACE_3565,SACE_4125,SACE_5017,SACE_5025,SACE_5537,SACE_5380,SACE_5699,SACE_7372		fa metabolism	0	0	1000	0	2	1.3.99.3
r1021	SACE_1823fa oxidation complex alpha subunit	cis,cis-3,6-Dodecadienoyl-CoA[c] <=> trans,cis-Lauro-2,6-dienoyl-CoA[c]	(SACE_1823)	SACE_1823		fa metabolism	1	-1000	1000	0	2	1.1.1.35 4.2.1.7 5.1.2.3 5.3.3.8
r1022	ferredoxin reductase	rbrdxRD[c] + NAD[c] <=> rbrdxOX[c] + NADH[c] + H[c]	(SACE_2839 and SACE_3145 and SACE_3433 and SACE_4511 and SACE_5609)	SACE_2839,SACE_3145,SACE_3433,SACE_4511,SACE_5609		fa metabolism	1	-1000	1000	0	2	1.18.1.3
r1023	Ferrodoxin:NAD oxidoreductase	fdxrd[c] + NAD[c] <=> fdxox[c] + NADH[c] + H[c]				fa metabolism	1	-1000	1000	0	2	1.18.1.3
r1024	SACE_1535putative zinc-type alcohol dehydrogenase transmembrane protein	1-alcohol[c] + NAD[c] <=> Aldehyde[c] + NADH[c] + H[c]	(SACE_1535) or (SACE_2374) or (SACE_2733) or (SACE_2738) or (SACE_2944) or (SACE_2945) or (SACE_3519) or (SACE_4085) or (SACE_4163) or (SACE_4519) or (SACE_4852)	SACE_1535,SACE_2374,SACE_2733,SACE_2738,SACE_2944,SACE_2945,SACE_3519,SACE_4085,SACE_4163,SACE_4519,SACE_4852		fa metabolism	1	-1000	1000	0	2	1.1.1.1
r1025	aldehyde dehydrogenase	Aldehyde[c] + NAD[c] + H2O[c] <=> fa[c] + NADH[c] + H[c]	(SACE_1341) or (SACE_2377) or (SACE_2783) or (SACE_2915) or (SACE_3880) or (SACE_6014) or (SACE_6249) or (SACE_6565) or (SACE_6566)	SACE_1341,SACE_2377,SACE_2783,SACE_2915,SACE_3880,SACE_6014,SACE_6249,SACE_6565,SACE_6566		fa metabolism	1	-1000	1000	0	2	1.2.1.3
r1026	putative cytochrome P450	cytP450r[c] + fa[c] + O2[c] => hydroxyfa_alpha[c] + cytP450o[c] + H2O[c]	(SACE_0125) or (SACE_2802) or (SACE_4144) or (SACE_4205) or (SACE_5309)	SACE_0125,SACE_2802,SACE_4144,SACE_4205,SACE_5309		fa metabolism	0	0	1000	0	2	1.14.14.1
r1027	Acyl Co-A synthesis	ATP[c] + fa[c] + CoA[c] <=> AMP[c] + Acyl-CoA[c] + Diphosphate[c]				fa metabolism	1	-1000	1000	0	2		reaction added for fa activation
r1028	hydroxymethylglutaryl-CoA synthase	Acetyl-CoA[c] + H2O[c] + Acetoacetyl-CoA[c] => (S)-3-Hydroxy-3-methylglutaryl-CoA[c] + CoA[c]	(SACE_4570)	SACE_4570		Synthesis and degradation of ketone bodies	0	0	1000	0	2	2.3.3.10
r1029	cytochrome P450 51	Lanosterol[c] + 3 O2[c] + 3 NADPH[c] + 3 H[c] => 44mctr[c] + Formate[c] + 3 NADP[c] + 4 H2O[c]	(SACE_3928)	SACE_3928		Biosynthesis of steroids	0	0	1000	0	2	1.14.13.70
r1030	cytochrome P450 51	Obtusifoliol[c] + 3 O2[c] + 3 NADPH[c] + 3 H[c] => mergtrol[c] + Formate[c] + 3 NADP[c] + 4 H2O[c]	(SACE_3928)	SACE_3928		Biosynthesis of steroids	0	-1000	1000	0	2	1.14.13.70
r1031	cholesterol oxidase	Cholesterol[c] + O2[c] <=> Cholest-4-en-3-one[c] + H2O2[c]	(SACE_6417) or (SACE_6705)	SACE_6417,SACE_6705		Bile acid biosynthesis	1	-1000	1000	0	2	1.1.3.6
r1032	SACE_1824acetyl-coa acetyltransferase （thiolase)	CoA[c] + 3alpha,7alpha,12alpha-Trihydroxy-5beta-24-oxocholestanoyl-CoA[c] => Propanoyl-CoA[c] + Choloyl-CoA[c]	(SACE_1824) or (SACE_3994)	SACE_1824,SACE_3994		Bile acid biosynthesis	0	0	1000	0	2	2.3.1.16
r1033	SACE_0343aldehyde dehydrogenase (NAD)	3alpha,7alpha-Dihydroxy-5beta-cholestan-26-al[c] + NAD[c] + H2O[c] <=> 3alpha,7alpha-Dihydroxy-5beta-cholestanate[c] + NADH[c] + H[c]	(SACE_0343) or (SACE_1341) or (SACE_2377) or (SACE_2783) or (SACE_2915) or (SACE_3880) or (SACE_6014) or (SACE_6249) or (SACE_6565) or (SACE_6566)	SACE_0343,SACE_1341,SACE_2377,SACE_2783,SACE_2915,SACE_3880,SACE_6014,SACE_6249,SACE_6565,SACE_6566		Bile acid biosynthesis	1	-1000	1000	0	2	1.2.1.3
r1034	SACE_1824acetyl-coa acetyltransferase (thiolase)	CoA[c] + 3alpha,7alpha-Dihydroxy-5beta-cholestanoyl-CoA[c] => Propanoyl-CoA[c] + Chenodeoxycholoyl-CoA[c]	(SACE_1824) or (SACE_3994)	SACE_1824,SACE_3994		Bile acid biosynthesis	0	0	1000	0	2	2.3.1.16
r1035	acyl-CoA dehydrogenase	3alpha,7alpha-Dihydroxy-5beta-cholestanoyl-CoA[c] + FAD[c] <=> 3alpha,7alpha-Dihydroxy-5beta-cholest-24-enoyl-CoA[c] + FADH2[c]	(SACE_0645) or (SACE_1457) or (SACE_3133) or (SACE_3243) or (SACE_3566) or (SACE_3580) or (SACE_4005) or (SACE_4589) or (SACE_5041) or (SACE_5168) or (SACE_5383) or (SACE_7242)	SACE_0645,SACE_1457,SACE_3133,SACE_3243,SACE_3566,SACE_3580,SACE_4005,SACE_4589,SACE_5041,SACE_5168,SACE_5383,SACE_7242		Bile acid biosynthesis	1	-1000	1000	0	2	1.3.99.-
r1036	acyl-CoA dehydrogenase	3alpha,7alpha,12alpha-Trihydroxy-5beta-cholestanoyl-CoA[c] + FAD[c] <=> 3alpha,7alpha,12alpha-Trihydroxy-5beta-cholest-24-enoyl-CoA[c] + FADH2[c]	(SACE_0645) or (SACE_1457) or (SACE_3133) or (SACE_3243) or (SACE_3566) or (SACE_3580) or (SACE_4005) or (SACE_4589) or (SACE_5041) or (SACE_5168) or (SACE_5383) or (SACE_7242)	SACE_0645,SACE_1457,SACE_3133,SACE_3243,SACE_3566,SACE_3580,SACE_4005,SACE_4589,SACE_5041,SACE_5168,SACE_5383,SACE_7242		Bile acid biosynthesis	1	-1000	1000	0	2	1.3.99.-
r1037	SACE_1535putative zinc-type alcohol dehydrogenase transmembrane protein	3alpha,7alpha,26-Trihydroxy-5beta-cholestane[c] + NAD[c] <=> 3alpha,7alpha-Dihydroxy-5beta-cholestan-26-al[c] + NADH[c] + H[c]	(SACE_1535) or (SACE_2374) or (SACE_2733) or (SACE_2738) or (SACE_2944) or (SACE_2945) or (SACE_3519) or (SACE_4085) or (SACE_4163) or (SACE_4519) or (SACE_4852) or (SACE_6396)	SACE_1535,SACE_2374,SACE_2733,SACE_2738,SACE_2944,SACE_2945,SACE_3519,SACE_4085,SACE_4163,SACE_4519,SACE_4852,SACE_6396		Bile acid biosynthesis	1	-1000	1000	0	2	1.1.1.1
r1038	SACE_2747short chain dehydrogenase/reductase family oxidoreductase	3alpha,7alpha,24-Trihydroxy-5beta-cholestanoyl-CoA[c] + NAD[c] <=> 3alpha,7alpha-Dihydroxy-5beta-24-oxocholestanoyl-CoA[c] + NADH[c] + H[c]	(SACE_2747) or (SACE_3080) or (SACE_4387) or (SACE_4696) or (SACE_5586) or (SACE_7048)	SACE_2747,SACE_3080,SACE_4387,SACE_4696,SACE_5586,SACE_7048		Bile acid biosynthesis	1	-1000	1000	0	2	1.1.1.-
r1039	SACE_1824acetyl-coa acetyltransferase (thiolase)	CoA[c] + 3alpha,7alpha-Dihydroxy-5beta-24-oxocholestanoyl-CoA[c] => Propanoyl-CoA[c] + Chenodeoxyglycocholoyl-CoA[c]	(SACE_1824) or (SACE_3994)	SACE_1824,SACE_3994		Bile acid biosynthesis	0	0	1000	0	2	2.3.1.16
r1040	SACE_2747short chain dehydrogenase/reductase family oxidoreductase	3alpha,7alpha,12alpha,24-Tetrahydroxy-5beta-cholestanoyl-CoA[c] + NAD[c] => 3alpha,7alpha,12alpha-Trihydroxy-5beta-24-oxocholestanoyl-CoA[c] + NADH[c] + H[c]	(SACE_2747) or (SACE_3080) or (SACE_4387) or (SACE_4696) or (SACE_5586) or (SACE_7048)	SACE_2747,SACE_3080,SACE_4387,SACE_4696,SACE_5586,SACE_7048		Bile acid biosynthesis	0	0	1000	0	2	1.1.1.-
r1041	SACE_4705short-chain dehydrogenase/reductase SDR	7alpha-Hydroxy-5beta-cholestan-3-one[c] + NADH[c] + H[c] => 3alpha,7alpha-Dihydroxy-5beta-cholestane[c] + NAD[c]	(SACE_4705)	SACE_4705		Bile acid biosynthesis	0	0	1000	0	2	1.1.1.53
r1042	SACE_4705short-chain dehydrogenase/reductase SDR	7alpha-Hydroxy-5beta-cholestan-3-one[c] + NADPH[c] + H[c] => 3alpha,7alpha-Dihydroxy-5beta-cholestane[c] + NADP[c]	(SACE_4705)	SACE_4705		Bile acid biosynthesis	0	0	1000	0	2	1.1.1.53
r1043	SACE_4705short-chain dehydrogenase/reductase SDR	7alpha,12alpha-Dihydroxy-5beta-cholestan-3-one[c] + NADH[c] + H[c] => 3alpha,7alpha,12alpha-Trihydroxy-5beta-cholestane[c] + NAD[c]	(SACE_4705)	SACE_4705		Bile acid biosynthesis	0	0	1000	0	2	1.1.1.53
r1044	SACE_4705short-chain dehydrogenase/reductase SDR	7alpha,12alpha-Dihydroxy-5beta-cholestan-3-one[c] + NADPH[c] + H[c] => 3alpha,7alpha,12alpha-Trihydroxy-5beta-cholestane[c] + NADP[c]	(SACE_4705)	SACE_4705		Bile acid biosynthesis	0	0	1000	0	2	1.1.1.53
r1045	SACE_1671PheA/TfdB family FAD-binding monooxygenase	7alpha-Hydroxycholest-4-en-3-one[c] + H[c] + O2[c] + NADPH[c] <=> 7alpha,12alpha-Dihydroxycholest-4-en-3-one[c] + NADP[c] + H2O[c]	(SACE_1671) or (SACE_3584) or (SACE_6561)	SACE_1671,SACE_3584,SACE_6561		Bile acid biosynthesis	1	-1000	1000	0	2	1.14.13.-
r1046	glycerol kinase	ATP[c] + Glycerol[c] => ADP[c] + glyc3p[c]	(SACE_6518)	SACE_6518		Glycerolipid metabolism	0	0	1000	0	2	2.7.1.30
r1047	NADP-dependent alcohol dehydrogenase	Glycerol[c] + NAD[c] <=> D-Glyceraldehyde[c] + NADH[c] + H[c]	(SACE_1843) or (SACE_2652)	SACE_1843,SACE_2652		Glycerolipid metabolism	1	-1000	1000	0	2	1.1.1.2
r1048	NADP-dependent alcohol dehydrogenase	Glycerol[c] + NADP[c] <=> D-Glyceraldehyde[c] + NADPH[c] + H[c]	(SACE_1843) or (SACE_2652)	SACE_1843,SACE_2652		Glycerolipid metabolism	0	0	0	0	2	1.1.1.2
r1049	SACE_0673lipase	1-Acylglycerol[c] + H2O[c] <=> Glycerol[c] + fa[c]	(SACE_0673)	SACE_0673		Glycerolipid metabolism	1	-1000	1000	0	2	3.1.1.23
r1050	SACE_0343aldehyde dehydrogenase (NAD)	D-Glyceraldehyde[c] + NAD[c] + H2O[c] => D-Glycerate[c] + NADH[c] + H[c]	(SACE_0343) or (SACE_1341) or (SACE_2377) or (SACE_2783) or (SACE_2915) or (SACE_3880) or (SACE_6014) or (SACE_6249) or (SACE_6565) or (SACE_6566)	SACE_0343,SACE_1341,SACE_2377,SACE_2783,SACE_2915,SACE_3880,SACE_6014,SACE_6249,SACE_6565,SACE_6566		Glycerolipid metabolism	0	0	1000	0	2	1.2.1.3
r1051	SACE_23791,3-propanediol dehydrogenase	3-Hydroxypropanal[c] + NADH[c] + H[c] => Propane-1,3-diol[c] + NAD[c]	(SACE_2379) or (SACE_2386)	SACE_2379,SACE_2386		Glycerolipid metabolism	0	0	1000	0	2	1.1.1.202
r1052	SACE_0083lipase	Triacylglycerol[c] + H2O[c] <=> 1,2-Diacyl-sn-glycerol[c] + fa[c]	(SACE_0083) or (SACE_0795) or (SACE_2354) or (SACE_3929)	SACE_0083,SACE_0795,SACE_2354,SACE_3929		Glycerolipid metabolism	1	-1000	1000	0	2	3.1.1.3
r1053	SACE_0083lipase	1,2-Diacyl-sn-glycerol[c] + H2O[c] <=> 1-Acylglycerol[c] + fa[c]	(SACE_0083) or (SACE_0795) or (SACE_2354) or (SACE_3929)	SACE_0083,SACE_0795,SACE_2354,SACE_3929		Glycerolipid metabolism	1	-1000	1000	0	2	3.1.1.3
r1054	SACE_17021-acyl-sn-glycerol-3-phosphate acyltransferase	1msg3p[c] + Acyl-CoA[c] => Phosphatidate[c] + CoA[c]	(SACE_1702) or (SACE_1791) or (SACE_5233) or (SACE_6138)	SACE_1702,SACE_1791,SACE_5233,SACE_6138		Glycerolipid metabolism	0	0	1000	0	2	2.3.1.51
r1055	putative alpha-galactosidase	Digalactosyl-diacylglycerol[c] + H2O[c] <=> 1,2-Diacyl-glcglyc[c] + D-Galactose[c]	(SACE_3139) or (SACE_7065)	SACE_3139,SACE_7065		Glycerolipid metabolism	1	-1000	1000	0	2	3.2.1.22
r1056	glycerate kinase	ATP[c] + D-Glycerate[c] => ADP[c] + 3-Phospho-D-glycerate[c]	(SACE_0098) or (SACE_6728)	SACE_0098,SACE_6728		Glycerolipid metabolism	0	0	1000	0	2	2.7.1.31
r1057	acyl-CoA:sn-glycerol-3-phosphate 1-O-acyltransferase	glyc3p[c] + Acyl-CoA[c] <=> 1msg3p[c] + CoA[c]				Glycerolipid metabolism	1	-1000	1000	0	2	2.3.1.15	reaction added for phospholipid metabolism
r1058	beta-galactosidase	glcglyc[c] + H2O[c] <=> Galactose[c] + Glycerol[c]	(SACE_0306) or (SACE_1940) or (SACE_5154) or (SACE_6726)	SACE_0306,SACE_1940,SACE_5154,SACE_6726		Glycerolipid metabolism	1	-1000	1000	0	2	3.2.1.23
r1059	SACE_6271putative adenosylcobalamin-dependent diol dehydratase gamma subunit	12ppd[c] <=> Propanal[c] + H2O[c]	(SACE_6271)	SACE_6271		Glycerolipid metabolism	1	-1000	1000	0	2	4.2.1.28
r1060	SACE_23791,3-propanediol dehydrogenase	Propanal[c] + NADH[c] + H[c] <=> Propane-1-ol[c] + NAD[c]	(SACE_2379) or (SACE_2386)	SACE_2379,SACE_2386		Glycerolipid metabolism	1	-1000	1000	0	2	1.1.1.202
r1061	glycerol-3-phosphate dehydrogenase (NAD(P)+)	dhap[c] + NADH[c] + H[c] => glyc3p[c] + NAD[c]	(SACE_6137)	SACE_6137		Glycerophospholipid metabolism	0	0	1000	0	2	1.1.1.94
r1062	glycerol-3-phosphate dehydrogenase (NAD(P)+)	glyc3p[c] + NADP[c] => dhap[c] + NADPH[c] + H[c]	(SACE_6137)	SACE_6137		Glycerophospholipid metabolism	0	0	0	0	2	1.1.1.94
r1063	glycerol-3-phosphate dehydrogenase	glyc3p[c] + FAD[c] => dhap[c] + FADH2[c]	(SACE_0658) or (SACE_3958) or (SACE_6515)	SACE_0658,SACE_3958,SACE_6515		Glycerophospholipid metabolism	0	0	1000	0	2	1.1.5.3
r1064	SACE_3183glycerol-3-phosphate cytidyltransferase	CTP[c] + glyc3p[c] <=> Diphosphate[c] + CDP-glycerol[c]	(SACE_3183)	SACE_3183		Glycerophospholipid metabolism	1	-1000	1000	0	2	2.7.7.39
r1065	glycerophosphoryl diester phosphodiesterase	g3pc[c] + H2O[c] <=> Choline[c] + glyc3p[c]	(SACE_0126) or (SACE_2292) or (SACE_3361) or (SACE_4968) or (SACE_6355) or (SACE_7169)	SACE_0126,SACE_2292,SACE_3361,SACE_4968,SACE_6355,SACE_7169		Glycerophospholipid metabolism	1	-1000	1000	0	2	3.1.4.46
r1066	non-hemolytic phospholipase C precursor	Phosphatidylcholine[c] + H2O[c] <=> 1,2-Diacyl-sn-glycerol[c] + cholp[c]	(SACE_5775)	SACE_5775		Glycerophospholipid metabolism	1	-1000	1000	0	2	3.1.4.3
r1067	glycerophosphoryl diester phosphodiesterase	g3pe[c] + H2O[c] <=> Ethanolamine[c] + glyc3p[c]	(SACE_0126) or (SACE_2292) or (SACE_3361) or (SACE_4968) or (SACE_6355) or (SACE_7169)	SACE_0126,SACE_2292,SACE_3361,SACE_4968,SACE_6355,SACE_7169		Glycerophospholipid metabolism	1	-1000	1000	0	2	3.1.4.46
r1068	phosphatidate cytidylyltransferase	CTP[c] + Phosphatidate[c] <=> Diphosphate[c] + CDP-diacylglycerol[c]	(SACE_6034)	SACE_6034		Glycerophospholipid metabolism	1	-1000	1000	0	2	2.7.7.41
r1069	SACE_2007CDP-diacylglycerol--glycerol-3-phosphate 3-phosphatidyltransferase, putative	CDP-diacylglycerol[c] + glyc3p[c] <=> CMP[c] + Phosphatidylglycerophosphate[c]	(SACE_2007) or (SACE_3847) or (SACE_5881)	SACE_2007,SACE_3847,SACE_5881		Glycerophospholipid metabolism	1	-1000	1000	0	2	2.7.8.5
r1070	non-hemolytic phospholipase C precursor	Phosphatidylglycerol[c] + H2O[c] <=> 1,2-Diacyl-sn-glycerol[c] + glyc3p[c]	(SACE_5775)	SACE_5775		Glycerophospholipid metabolism	1	-1000	1000	0	2	3.1.4.3
r1071	non-hemolytic phospholipase C precursor	Phosphatidylethanolamine[c] + H2O[c] => 1,2-Diacyl-sn-glycerol[c] + ethamp[c]	(SACE_5775)	SACE_5775		Glycerophospholipid metabolism	0	0	1000	0	2	3.1.4.3
r1072	phosphatidylserine decarboxylase proenzyme	Phosphatidylserine[c] <=> Phosphatidylethanolamine[c] + CO2[c]	(SACE_0521) or (SACE_0607)	SACE_0521,SACE_0607		Glycerophospholipid metabolism	1	-1000	1000	0	2	4.1.1.65
r1073	SACE_4353phosphatidylethanolamine N-methyltransferase	amet[c] + Phosphatidylethanolamine[c] <=> ahcys[c] + Phosphatidyl-N-methylethanolamine[c]	(SACE_4353)	SACE_4353		Glycerophospholipid metabolism	1	-1000	1000	0	2	2.1.1.17
r1074	CDP-diacylglycerol:choline O-phosphatidyltransferase	CDP-diacylglycerol[c] + Choline[c] => CMP[c] + Phosphatidylcholine[c]				Glycerophospholipid metabolism	0	0	1000	0	2	2.7.8.24
r1075	Phosphatidylglycerophosphate phosphohydrolase	Phosphatidylglycerophosphate + H2O[c] <=> Phosphatidylglycerol[c] + Orthophosphate[c]				Glycerophospholipid metabolism	1	-1000	1000	0	2	3.1.3.27	reaction added for phospholipid metabolism
r1076	cardiolipin synthase eukaryotic type	Phosphatidylglycerol[c] + CDP-diacylglycerol[c] <=> Cardiolipin[c] + CMP[c]	(SACE_3847)	SACE_3847		Glycerophospholipid metabolism	1	-1000	1000	0	2	2.7.8.41	reaction added to complete cardiolipin biosynthesis (eukayotic type CLS)
r1077	SACE_0660FAD linked oxidase-like	Acyldhap[c] + alcohol(Long-chain)[c] <=> O-Alkyldhap[c] + acid-anion(Long-chain)[c]	(SACE_0660) or (SACE_3960)	SACE_0660,SACE_3960		Ether lipid metabolism	1	-1000	1000	0	2	2.5.1.26
r1078	SACE_17021-acyl-sn-glycerol-3-phosphate acyltransferase	Acyl-CoA[c] + 1-Alkyl-sn-glycero-3-phosphate[c] <=> CoA[c] + 2-Acyl-1-alkyl-sn-glycero-3-phosphate[c]	(SACE_1702) or (SACE_1791) or (SACE_5233) or (SACE_6138)	SACE_1702,SACE_1791,SACE_5233,SACE_6138		Ether lipid metabolism	1	-1000	1000	0	2	2.3.1.51
r1079	non-hemolytic phospholipase C precursor	O-1-Alk-1-enyl-2-acyl-g3pe[c] + H2O[c] <=> 1-Alkenyl-2-acylglycerol[c] + ethamp[c]	(SACE_5775)	SACE_5775		Ether lipid metabolism	1	-1000	1000	0	2	3.1.4.3
r1080	SACE_4785putative glycosyl hydrolase	Glucosylceramide[c] + H2O[c] <=> alpha-D-Glucose[c] + N-Acylsphingosine[c]	(SACE_4785)	SACE_4785		Sphingolipid metabolism	1	-1000	1000	0	2	3.2.1.45
r1081	beta-galactosidase	beta-D-Galactosyl-1,4-beta-D-glucosylceramide[c] + H2O[c] <=> Glucosylceramide[c] + D-Galactose[c]	(SACE_0306) or (SACE_1940) or (SACE_5154) or (SACE_6726)	SACE_0306,SACE_1940,SACE_5154,SACE_6726		Sphingolipid metabolism	1	-1000	1000	0	2	3.2.1.23
r1082	SACE_1663exo-alpha-sialidase	GM4[c] + H2O[c] => Galactosylceramide[c] + N-Acetylneuraminate[c]	(SACE_1663) or (SACE_5159)	SACE_1663,SACE_5159		Sphingolipid metabolism	0	0	1000	0	2	3.2.1.18
r1083	putative alpha-galactosidase	Digalactosylceramide[c] + H2O[c] <=> Galactosylceramide[c] + D-Galactose[c]	(SACE_3139) or (SACE_7065)	SACE_3139,SACE_7065		Sphingolipid metabolism	1	-1000	1000	0	2	3.2.1.22
r1084	proable arylsulfatase	Sulfatide[c] + H2O[c] <=> Galactosylceramide[c] + Sulfate[c]	(SACE_3101)	SACE_3101		Sphingolipid metabolism	1	-1000	1000	0	2	3.1.6.1
r1085	SACE_5537acyl-CoA oxidase	OPC8-CoA[c] + FAD[c] <=> trans-2-Enoyl-OPC8-CoA[c] + FADH2[c]	(SACE_5537) or (SACE_7372)	SACE_5537,SACE_7372		alpha-Linolenic acid metabolism	1	-1000	1000	0	2	1.3.3.6
r1086	SACE_1824acetyl-coa acetyltransferase （thiolase)	CoA[c] + 3-Oxo-OPC8-CoA[c] => OPC6-CoA[c] + Acetyl-CoA[c]	(SACE_1824) or (SACE_3994)	SACE_1824,SACE_3994		alpha-Linolenic acid metabolism	0	0	1000	0	2	2.3.1.16
r1087	SACE_5537acyl-CoA oxidase	OPC6-CoA[c] + FAD[c] <=> trans-2-Enoyl-OPC6-CoA[c] + FADH2[c]	(SACE_5537) or (SACE_7372)	SACE_5537,SACE_7372		alpha-Linolenic acid metabolism	1	-1000	1000	0	2	1.3.3.6
r1088	SACE_1824acetyl-coa acetyltransferase （thiolase)	CoA[c] + 3-Oxo-OPC6-CoA[c] => OPC4-CoA[c] + Acetyl-CoA[c]	(SACE_1824) or (SACE_3994)	SACE_1824,SACE_3994		alpha-Linolenic acid metabolism	0	0	1000	0	2	2.3.1.16
r1089	SACE_5537acyl-CoA oxidase	OPC4-CoA[c] + FAD[c] <=> trans-2-Enoyl-OPC4-CoA[c] + FADH2[c]	(SACE_5537) or (SACE_7372)	SACE_5537,SACE_7372		alpha-Linolenic acid metabolism	1	-1000	1000	0	2	1.3.3.6
r1090	SACE_1824acetyl-coa acetyltransferase （thiolase)	CoA[c] + 3-Oxo-OPC4-CoA[c] => 7isojacoa[c] + Acetyl-CoA[c]	(SACE_1824) or (SACE_3994)	SACE_1824,SACE_3994		alpha-Linolenic acid metabolism	0	0	1000	0	2	2.3.1.16
r1091	SACE_1184putative acyl coenzyme A thioester hydrolase	Palmitoyl-CoA[c] + H2O[c] <=> CoA[c] + hdca[c]	(SACE_1184) or (SACE_5039) or (SACE_5719)	SACE_1184,SACE_5039,SACE_5719		Polyunsaturated fa biosynthesis	1	-1000	1000	0	2	3.1.2.2
r1092	SACE_0819stearoyl-CoA 9-desaturase	Stearoyl-CoA[c] + 2 focytb5[c] + O2[c] + 2 H[c] <=> Oleoyl-CoA[c] + 2 ficytb5[c] + 2 H2O[c]	(SACE_0819) or (SACE_6758)	SACE_0819,SACE_6758		Polyunsaturated fa biosynthesis	1	-1000	1000	0	2	1.14.19.1
r1093	SACE_0819stearoyl-CoA 9-desaturase	Octadecanoyl-ACP[c] + acceptor(reduced)[c] + O2[c] <=> Oleoyl-ACP[c] + Acceptor[c] + 2 H2O[c]	(SACE_0819) or (SACE_6758)	SACE_0819,SACE_6758		Polyunsaturated fa biosynthesis	1	-1000	1000	0	2	1.14.19.1
r1094	SACE_22063-ketoacyl-（ACP) reductase	3-Oxostearoyl-CoA[c] + NADPH[c] + H[c] <=> 3-Hydroxyoctadecanoyl-CoA[c] + NADP[c]	(SACE_2206) or (SACE_2735) or (SACE_3681) or (SACE_3687) or (SACE_3787) or (SACE_4013) or (SACE_4805) or (SACE_5381) or (SACE_5392) or (SACE_7303)	SACE_2206,SACE_2735,SACE_3681,SACE_3687,SACE_3787,SACE_4013,SACE_4805,SACE_5381,SACE_5392,SACE_7303		Polyunsaturated fa biosynthesis	1	-1000	1000	0	2	1.1.1.100
r1095	SACE_5537acyl-CoA oxidase	(6Z,9Z,12Z,15Z,18Z,21Z)-Tetracosahexaenoyl-CoA[c] + FAD[c] <=> (2E,6Z,9Z,12Z,15Z,18Z,21Z)-Tetracosahepta-2,6,9,12,15,18,21-enoyl-CoA[c] + FADH2[c]	(SACE_5537) or (SACE_7372)	SACE_5537,SACE_7372		Polyunsaturated fa biosynthesis	1	-1000	1000	0	2	1.3.3.6
r1096	SACE_5537acyl-CoA oxidase	(6Z,9Z,12Z,15Z,18Z)-Tetracosapentaenoyl-CoA[c] + FAD[c] <=> (2E,6Z,9Z,12Z,15Z,18Z)-Tetracosahexa-2,6,9,12,15,18-enoyl-CoA[c] + FADH2[c]	(SACE_5537) or (SACE_7372)	SACE_5537,SACE_7372		Polyunsaturated fa biosynthesis	1	-1000	1000	0	2	1.3.3.6
r1097	SACE_1184putative acyl coenzyme A thioester hydrolase	Stearoyl-CoA[c] + H2O[c] <=> CoA[c] + ocdca[c]	(SACE_1184) or (SACE_5039) or (SACE_5719)	SACE_1184,SACE_5039,SACE_5719		Polyunsaturated fa biosynthesis	1	-1000	1000	0	2	3.1.2.2
r1098	SACE_1184putative acyl coenzyme A thioester hydrolase	Eicosanoyl-CoA[c] + H2O[c] <=> CoA[c] + icoa[c]	(SACE_1184)	SACE_1184		Polyunsaturated fa biosynthesis	1	-1000	1000	0	2	3.1.2.2
r1099	SACE_1184putative acyl coenzyme A thioester hydrolase	Oleoyl-CoA[c] + H2O[c] <=> CoA[c] + (9Z)-ocdce[c]	(SACE_1184) or (SACE_5039) or (SACE_5719)	SACE_1184,SACE_5039,SACE_5719		Polyunsaturated fa biosynthesis	1	-1000	1000	0	2	3.1.2.2
r1100	SACE_1184putative acyl coenzyme A thioester hydrolase	Linoleoyl-CoA[c] + H2O[c] <=> CoA[c] + Linoleate[c]	(SACE_1184)	SACE_1184		Polyunsaturated fa biosynthesis	1	-1000	1000	0	2	3.1.2.2
r1101	SACE_1184putative acyl coenzyme A thioester hydrolase	(9Z,12Z,15Z)-Octadecatrienoyl-CoA[c] + H2O[c] <=> CoA[c] + (9Z,12Z,15Z)oatadeca[c]	(SACE_1184)	SACE_1184		Polyunsaturated fa biosynthesis	1	-1000	1000	0	2	3.1.2.2
r1102	SACE_1184putative acyl coenzyme A thioester hydrolase	(5Z,8Z,11Z,14Z,17Z)-Icosapentaenoyl-CoA[c] + H2O[c] <=> CoA[c] + (5Z,8Z,11Z,14Z,17Z)-icosa[c]	(SACE_1184)	SACE_1184		Polyunsaturated fa biosynthesis	1	-1000	1000	0	2	3.1.2.2
r1103	SACE_1184putative acyl coenzyme A thioester hydrolase	(4Z,7Z,10Z,13Z,16Z,19Z)-Docosahexaenoyl-CoA[c] + H2O[c] <=> CoA[c] + (4Z,7Z,10Z,13Z,16Z,19Z)-docosa[c]	(SACE_1184)	SACE_1184		Polyunsaturated fa biosynthesis	1	-1000	1000	0	2	3.1.2.2
r1104	SACE_1184putative acyl coenzyme A thioester hydrolase	gamma-Linolenoyl-CoA[c] + H2O[c] <=> CoA[c] + (6Z,9Z,12Z)-octada[c]	(SACE_1184)	SACE_1184		Polyunsaturated fa biosynthesis	1	-1000	1000	0	2	3.1.2.2
r1105	SACE_1184putative acyl coenzyme A thioester hydrolase	8,11,14-Eicosatrienoyl-CoA[c] + H2O[c] <=> CoA[c] + (8Z,11Z,14Z)-icosa[c]	(SACE_1184)	SACE_1184		Polyunsaturated fa biosynthesis	1	-1000	1000	0	2	3.1.2.2
r1106	SACE_1184putative acyl coenzyme A thioester hydrolase	Arachidonyl-CoA[c] + H2O[c] <=> CoA[c] + (5Z,8Z,11Z,14Z)-icosa[c]	(SACE_1184)	SACE_1184		Polyunsaturated fa biosynthesis	1	-1000	1000	0	2	3.1.2.2
r1107	thioesterase	Docosanoyl-CoA[c] + H2O[c] <=> CoA[c] + docoa[c]	(SACE_4921)	SACE_4921		Polyunsaturated fa biosynthesis	1	-1000	1000	0	2	3.1.2.-
r1108	thioesterase	Tetracosanoyl-CoA[c] + H2O[c] <=> CoA[c] + tetra[c]	(SACE_4921)	SACE_4921		Polyunsaturated fa biosynthesis	1	-1000	1000	0	2	3.1.2.-
r1109	thioesterase	Icosenoyl-CoA[c] + H2O[c] <=> CoA[c] + icosa[c]	(SACE_4921)	SACE_4921		Polyunsaturated fa biosynthesis	1	-1000	1000	0	2	3.1.2.-
r1110	thioesterase	Docosenoyl-CoA[c] + H2O[c] <=> CoA[c] + (13Z)-docoa[c]	(SACE_4921)	SACE_4921		Polyunsaturated fa biosynthesis	1	-1000	1000	0	2	3.1.2.-
r1111	thioesterase	Tetracosenoyl-CoA[c] + H2O[c] <=> CoA[c] + (15Z)-tetra[c]	(SACE_4921)	SACE_4921		Polyunsaturated fa biosynthesis	1	-1000	1000	0	2	3.1.2.-
r1112	thioesterase	(7Z,10Z,13Z,16Z,19Z)-Docosapentaenoyl-CoA[c] + H2O[c] <=> CoA[c] + Docosapentaenoic-acid[c]	(SACE_4921)	SACE_4921		Polyunsaturated fa biosynthesis	1	-1000	1000	0	2	3.1.2.-
r1113	thioesterase	(11Z,14Z)-Icosadienoyl-CoA[c] + H2O[c] <=> CoA[c] + icosa[c]	(SACE_4921)	SACE_4921		Polyunsaturated fa biosynthesis	1	-1000	1000	0	2	3.1.2.-
r1114	thioesterase	(7Z,10Z,13Z,16Z)-Docosatetraenoyl-CoA[c] + H2O[c] <=> CoA[c] + 7,10,13,16-docosa[c]	(SACE_4921)	SACE_4921		Polyunsaturated fa biosynthesis	1	-1000	1000	0	2	3.1.2.-
r1115	thioesterase	(11Z,14Z,17Z)-Icosatrienoyl-CoA[c] + H2O[c] <=> CoA[c] + icosa[c]	(SACE_4921)	SACE_4921		Polyunsaturated fa biosynthesis	1	-1000	1000	0	2	3.1.2.-
r1116	thioesterase	(13Z,16Z)-Docosadi-13,16-enoyl-CoA[c] + H2O[c] <=> CoA[c] + 13,16docoa[c]	(SACE_4921)	SACE_4921		Polyunsaturated fa biosynthesis	1	-1000	1000	0	2	3.1.2.-
r1117	SACE_0343aldehyde dehydrogenase (NAD)	3-Aminopropanal[c] + NAD[c] + H2O[c] <=> beta-Alanine[c] + NADH[c] + H[c]	(SACE_0343) or (SACE_1341) or (SACE_2377) or (SACE_2783) or (SACE_2915) or (SACE_3880) or (SACE_6014) or (SACE_6249) or (SACE_6565) or (SACE_6566)	SACE_0343,SACE_1341,SACE_2377,SACE_2783,SACE_2915,SACE_3880,SACE_6014,SACE_6249,SACE_6565,SACE_6566		beta-Alanine metabolism	1	-1000	1000	0	2	1.2.1.3
r1118	putative L-alanine dehydrogenase	L-Alanine[c] + NAD[c] + H2O[c] => Pyruvate[c] + NH3[c] + NADH[c] + H[c]	(SACE_6380)	SACE_6380		Taurine and hypotaurine metabolism	0	0	1000	0	2	1.4.1.1
r1119	putative gamma-glutamyl transferase	(5-L-Glutamyl)-peptide[c] + Taurine[c] <=> Peptide(a)[c] + 5-L-Glutamyl-taurine[c]	(SACE_0096) or (SACE_2111)	SACE_0096,SACE_2111		Taurine and hypotaurine metabolism	1	-1000	1000	0	2	2.3.2.2
r1120	selenide, water dikinase	ATP[c] + Selenide[c] + H2O[c] => AMP[c] + Selenophosphate[c] + Orthophosphate[c]	(SACE_3560)	SACE_3560		Selenoamino acid metabolism	0	0	1000	0	2	2.7.9.3
r1121	cysteine desulfurase / selenocysteine lyase	Selenocysteine[c] + acceptor(reduced)[c] => Selenide[c] + L-Alanine[c] + Acceptor[c]	(SACE_2177)	SACE_2177		Selenoamino acid metabolism	0	0	1000	0	2	2.8.1.7 4.4.1.16
r1122	cysteine synthase	O-Acetyl-L-serine[c] + Selenide[c] <=> Selenocysteine[c] + Acetate[c]	(SACE_1206) or (SACE_1726) or (SACE_2893) or (SACE_3013) or (SACE_4282) or (SACE_6328) or (SACE_6924)	SACE_1206,SACE_1726,SACE_2893,SACE_3013,SACE_4282,SACE_6328,SACE_6924		Selenoamino acid metabolism	1	-1000	1000	0	2	2.5.1.47
r1123	methionine gamma-lyase	Selenomethionine[c] + H2O[c] <=> Methaneselenol[c] + NH3[c] + 2-Oxobutanoate[c]	(SACE_3377)	SACE_3377		Selenoamino acid metabolism	1	-1000	1000	0	2	4.4.1.11
r1124	methionine adenosyltransferase 1 (AdoMet synthetase)	ATP[c] + Selenomethionine[c] + H2O[c] <=> Orthophosphate[c] + Diphosphate[c] + Se-Adenosylselenomethionine[c]	(SACE_2103) or (SACE_3900)	SACE_2103,SACE_3900		Selenoamino acid metabolism	1	-1000	1000	0	2	2.5.1.6
r1125	methionyl-tRNA synthetase	ATP[c] + Selenomethionine[c] + tRNA(Met)[c] <=> AMP[c] + Diphosphate[c] + Selenomethionyl-tRNA(Met)[c]	(SACE_0799)	SACE_0799		Selenoamino acid metabolism	1	-1000	1000	0	2	6.1.1.10
r1126	SACE_3527sulfate adenylyltranferase, aps kinase	ATP[c] + Adenylylselenate[c] <=> ADP[c] + 3'-Phosphoadenylylselenate[c]	(SACE_3527 and SACE_3531 and SACE_1473 and SACE_1474 and SACE_3530)	SACE_3527,SACE_3531,SACE_1473,SACE_1474,SACE_3530		Selenoamino acid metabolism	1	-1000	1000	0	2	2.7.1.25 2.7.7.4
r1127	sulfate adenylyltransferase subunit 1 / aps kinase	ATP[c] + Selenate[c] => Diphosphate[c] + Adenylylselenate[c]	(SACE_1473 and SACE_1474 and SACE_3527 and SACE_3530 and SACE_3531)	SACE_1473,SACE_1474,SACE_3527,SACE_3530,SACE_3531		Selenoamino acid metabolism	0	0	1000	0	2	2.7.7.4
r1128	SACE_6136cystathionine gamma-lyase	Selenocystathionine[c] + H2O[c] <=> Selenocysteine[c] + NH3[c] + 2-Oxobutanoate[c]	(SACE_6136)	SACE_6136		Selenoamino acid metabolism	0	0	0	0	2	4.4.1.1
r1129	putative gamma-glutamyl transferase	(5-L-Glutamyl)-peptide[c] + Se-Methylselenocysteine[c] <=> Peptide[c] + gamma-Glutamyl-Se-methylselenocysteine[c]	(SACE_0096) or (SACE_2111)	SACE_0096,SACE_2111		Selenoamino acid metabolism	1	-1000	1000	0	2	2.3.2.2
r1130	ahcys hydrolase	Se-Adenosylselenohomocysteine[c] + H2O[c] <=> Adenosine[c] + Selenohomocysteine[c]	(SACE_3897) or (SACE_6450)	SACE_3897,SACE_6450		Selenoamino acid metabolism	1	-1000	1000	0	2	3.3.1.1
r1131	SACE_0626putative tRNA/rRNA methyltransferase	R[c] + Se-Adenosylselenomethionine[c] <=> CH3-R[c] + Se-Adenosylselenohomocysteine[c]	(SACE_0626) or (SACE_1075) or (SACE_1452) or (SACE_1814) or (SACE_2602) or (SACE_2878) or (SACE_4650) or (SACE_5595) or (SACE_6107) or (SACE_6809)	SACE_0626,SACE_1075,SACE_1452,SACE_1814,SACE_2602,SACE_2878,SACE_4650,SACE_5595,SACE_6107,SACE_6809		Selenoamino acid metabolism	1	-1000	1000	0	2	2.1.1.-
r1132	cystathionine beta-synthase	L-Serine[c] + Selenohomocysteine[c] <=> Selenocystathionine[c] + H2O[c]	(SACE_0899)	SACE_0899		Selenoamino acid metabolism	1	-1000	1000	0	2	4.2.1.22
r1133	cystathionine gamma-synthase	O-Phosphorylhomoserine[c] + Selenocysteine[c] <=> Selenocystathionine[c] + Orthophosphate[c]	(SACE_0902)	SACE_0902		Selenoamino acid metabolism	1	-1000	1000	0	2	2.5.1.48
r1134	cystathionine gamma-synthase	O-Acetylhomoserine[c] + Selenocysteine[c] <=> Selenocystathionine[c] + Acetate[c]	(SACE_0902)	SACE_0902		Selenoamino acid metabolism	1	-1000	1000	0	2	2.5.1.48
r1135	cystathionine gamma-synthase	suchms + Selenocysteine[c] => Selenocystathionine[c] + Succinate[c]	(SACE_0902)	SACE_0902		Selenoamino acid metabolism	0	0	1000	0	2	2.5.1.48
r1136	SACE_3552selenocysteine synthase	L-Seryl-tRNA(Sec)[c] + Selenophosphate[c] <=> L-Selenocysteinyl-tRNA(Sec)[c] + Orthophosphate[c]	(SACE_3552)	SACE_3552		Selenoamino acid metabolism	1	-1000	1000	0	2	2.9.1.1
r1137	amet:thiol S-methyltransferase	L-Selenocysteine[c] + amet[c] <=> Se-Methyl-L-selenocysteine[c] + ahcys[c]				Selenoamino acid metabolism	1	-1000	1000	0	2	2.1.1.9	reaction added for gap filling
r1138	SACE_1914amidase	monoaad[c] + H2O[c] <=> Carboxylate[c] + NH3[c]	(SACE_1914) or (SACE_4293) or (SACE_4294) or (SACE_5032)	SACE_1914,SACE_4293,SACE_4294,SACE_5032		Cyanoamino acid metabolism	1	-1000	1000	0	2	3.5.1.4
r1139	putative gamma-glutamyl transferase	3-Cyano-L-alanine[c] + L-Glutamate[c] <=> gamma-Glutamyl-beta-cyanoalanine[c] + H2O[c]	(SACE_0096) or (SACE_2111)	SACE_0096,SACE_2111		Cyanoamino acid metabolism	1	-1000	1000	0	2	2.3.2.2
r1140	putative gamma-glutamyl transferase	beta-Aminopropionitrile[c] + L-Glutamate[c] <=> gamma-Glutamyl-beta-aminopropiononitrile[c] + H2O[c]	(SACE_0096) or (SACE_2111)	SACE_0096,SACE_2111		Cyanoamino acid metabolism	1	-1000	1000	0	2	2.3.2.2
r1141	beta-D-glucosidase	Cyanoglycoside[c] + H2O[c] <=> Cyanohydrin[c] + alpha-D-Glucose[c]	(SACE_0732) or (SACE_1247) or (SACE_1284) or (SACE_4101) or (SACE_5452) or (SACE_6502)	SACE_0732,SACE_1247,SACE_1284,SACE_4101,SACE_5452,SACE_6502		Cyanoamino acid metabolism	1	-1000	1000	0	2	3.2.1.21
r1142	SACE_1671PheA/TfdB family FAD-binding monooxygenase	(Z)-4-Hydroxyphenylacetaldehyde-oxime[c] + NADPH[c] + H[c] + O2[c] <=> (S)-4-Hydroxymandelonitrile[c] + NADP[c] + 2 H2O[c]	(SACE_1671) or (SACE_3584) or (SACE_6561)	SACE_1671,SACE_3584,SACE_6561		Cyanoamino acid metabolism	1	-1000	1000	0	2	1.14.13.-
r1143	glutamate dehydrogenase (NAD(P)+)	2-Oxoglutarate[c] + NH3[c] + NADPH[c] + H[c] => L-Glutamate[c] + NADP[c] + H2O[c]	(SACE_3873) or (SACE_3882) or (SACE_5979)	SACE_3873,SACE_3882,SACE_5979		D-Glutamine and D-glutamate metabolism	0	0	0	0	2	1.4.1.3 1.4.1.4
r1144	glutamate racemase	L-Glutamate[c] => D-Glutamate[c]	(SACE_1209)	SACE_1209		D-Glutamine and D-glutamate metabolism	0	0	1000	0	2	5.1.1.3
r1145	glutaminase	D-Glutamine[c] + H2O[c] <=> D-Glutamate[c] + NH3[c]	(SACE_1670)	SACE_1670		D-Glutamine and D-glutamate metabolism	1	-1000	1000	0	2	3.5.1.2
r1146	SACE_3574UDP-N-acetylmuramoylalanine--D-glutamate ligase	ATP[c] + uama[c] + D-Glutamate[c] <=> ADP[c] + Orthophosphate[c] + uamag[c]	(SACE_3574) or (SACE_5853)	SACE_3574,SACE_5853		D-Glutamine and D-glutamate metabolism	1	-1000	1000	0	2	6.3.2.9
r1147	UDP-N-acetylmuramate--L-alanine ligase	ATP[c] + UDP-N-acetylmuramate[c] + L-Alanine[c] <=> ADP[c] + Orthophosphate[c] + uama[c]	(SACE_5850)	SACE_5850		D-Glutamine and D-glutamate metabolism	1	-1000	1000	0	2	6.3.2.8
r1148	D-amino acid oxidase	D-Ornithine[c] + H2O[c] + O2[c] <=> 5a2ohp[c] + NH3[c] + H2O2[c]	(SACE_0979)	SACE_0979		D-Arginine and D-ornithine metabolism	1	-1000	1000	0	2	1.4.3.3
r1149	D-amino acid oxidase	D-Arginine[c] + H2O[c] + O2[c] <=> 5-Guanidino-2-oxopentanoate[c] + NH3[c] + H2O2[c]	(SACE_0979)	SACE_0979		D-Arginine and D-ornithine metabolism	1	-1000	1000	0	2	1.4.3.3
r1150	alanine racemase	L-Alanine[c] => D-Alanine[c]	(SACE_6764)	SACE_6764		D-Alanine metabolism	0	0	1000	0	2	5.1.1.1
r1151	D-alanyl-alanine synthetase A	ATP[c] + 2 D-Alanine[c] <=> ADP[c] + Orthophosphate[c] + alaala[c]	(SACE_6130) or (SACE_7389)	SACE_6130,SACE_7389		D-Alanine metabolism	1	-1000	1000	0	2	6.3.2.4
r1152	putative gamma-glutamyl transferase	Glutathione[c] + H2O[c] => Cys-Gly[c] + L-Glutamate[c]	(SACE_0096) or (SACE_2111)	SACE_0096,SACE_2111		Glutathione metabolism	0	0	1000	0	2	2.3.2.2
r1153	glutamate-cysteine ligase	ATP[c] + L-Glutamate[c] + L-Cysteine[c] <=> ADP[c] + Orthophosphate[c] + glucys[c]	(SACE_3826)	SACE_3826		Glutathione metabolism	1	-1000	1000	0	2	6.3.2.2
r1154	leucine aminopeptidase	Cys-Gly[c] + H2O[c] <=> L-Cysteine[c] + Glycine[c]	(SACE_1030) or (SACE_1339) or (SACE_1642)	SACE_1030,SACE_1339,SACE_1642		Glutathione metabolism	1	-1000	1000	0	2	3.4.11.1 3.4.11.2
r1155	putative gamma-glutamyl transferase	Glutathione[c] + L-aa[c] <=> Cys-Gly[c] + (5-L-Glutamyl)-L-aa[c]	(SACE_0096) or (SACE_2111)	SACE_0096,SACE_2111		Glutathione metabolism	1	-1000	1000	0	2	2.3.2.2
r1156	SACE_2873glutathione S-transferase	RX[c] + Glutathione[c] <=> HX[c] + R-S-Glutathione[c]	(SACE_2873)	SACE_2873		Glutathione metabolism	1	-1000	1000	0	2	2.5.1.18
r1157	putative gamma-glutamyl transferase	R-S-Glutathione[c] + H2O[c] <=> R-S-Cysteinylglycine[c] + L-Glutamate[c]	(SACE_0096) or (SACE_2111)	SACE_0096,SACE_2111		Glutathione metabolism	1	-1000	1000	0	2	2.3.2.2
r1158	leucine aminopeptidase	R-S-Cysteinylglycine[c] + H2O[c] <=> ssubslcys[c] + Glycine[c]	(SACE_1030) or (SACE_1339) or (SACE_1642)	SACE_1030,SACE_1339,SACE_1642		Glutathione metabolism	1	-1000	1000	0	2	3.4.11.1
r1159	glucys:glycine ligase (ADP-forming)	ATP[c] + glucys[c] + Glycine[c] <=> ADP[c] + Orthophosphate[c] + Glutathione[c]				Glutathione metabolism	1	-1000	1000	0	2	6.3.2.3	reaction added for gap filling
r1160	mycothione/glutathione reductase	gthox[c] + NADPH[c] + H[c] => 2 Glutathione[c] + NADP[c]	(SACE_5978)	SACE_5978		Glutathione metabolism	0	0	1000	0	2	1.8.1.7
r1161	SACE_5569putative phosphoheptose isomerase	ATP[c] + gmhep1p[c] => Diphosphate[c] + ADP-D-glycero-D-manno-heptose[c]	(SACE_5569)	SACE_5569		Lipopolysaccharide biosynthesis	0	0	1000	0	2	2.7.1.- 2.7.7.-
r1162	phosphoheptose isomerase	s7p[c] => gmhep7p[c]	(SACE_3069) or (SACE_3071) or (SACE_5570)	SACE_3069,SACE_3071,SACE_5570		Lipopolysaccharide biosynthesis	0	0	1000	0	2	5.-.-.-
r1163	SACE_5569putative phosphoheptose isomerase	ATP[c] + gmhep7p[c] => ADP[c] + gmhep17bp[c]	(SACE_5569)	SACE_5569		Lipopolysaccharide biosynthesis	0	0	1000	0	2	2.7.1.- 2.7.7.-
r1164	SACE_0046peptidoglycan glycosyltransferase	uaagtmad[c] + [GlcNAc-(1->4)-Mur2Ac(oyl-L-Ala-g-D-Glu-A2pm-D-Ala-D-Ala)]n-diphosphoundecaprenol[c] <=> dtpcudcpp[c] + [GlcNAc-(1->4)-Mur2Ac(oyl-L-Ala-g-D-Glu-A2pm-D-Ala-D-Ala)]n-diphosphoundecaprenol[c]	(SACE_0046) or (SACE_5864)	SACE_0046,SACE_5864		Peptidoglycan biosynthesis	1	-1000	1000	0	2	2.4.1.129
r1165	UDP-N-acetylmuramoyl-tripeptide--D-alanyl-D-alani ne ligase	ATP[c] + uAgl[c] + alaala[c] <=> ADP[c] + Orthophosphate[c] + uAgla[c]	(SACE_5855)	SACE_5855		Peptidoglycan biosynthesis	1	-1000	1000	0	2	6.3.2.10
r1166	UDP-N-acetylmuramoyl-tripeptide--D-alanyl-D-alani ne ligase	ATP[c] + uGgl[c] + alaala[c] <=> ADP[c] + Orthophosphate[c] + UDPMurAc(oyl-L-Ala-D-gamma-Glu-L-Lys-D-Ala-D-Ala)[c]	(SACE_5855)	SACE_5855		Peptidoglycan biosynthesis	1	-1000	1000	0	2	6.3.2.10
r1167	undecaprenyldiphospho-muramoylpentapeptide beta-N-acetylglucosaminyltransferase	uaAgla[c] + uacgam[c] <=> uaaAgla[c] + UDP[c]	(SACE_5851)	SACE_5851		Peptidoglycan biosynthesis	1	-1000	1000	0	2	2.4.1.227
r1168	glutamine synthetase	ATP[c] + uaaAgla[c] + NH3[c] <=> ADP[c] + Orthophosphate[c] + uaaAgtla[c]	(SACE_1613) or (SACE_1623) or (SACE_3095) or (SACE_5355)	SACE_1613,SACE_1623,SACE_3095,SACE_5355		Peptidoglycan biosynthesis	1	-1000	1000	0	2	6.3.1.2
r1169	glutamine synthetase	ATP[c] + uaaGgla[c] + NH3[c] <=> ADP[c] + Orthophosphate[c] + uaaGgtla[c]	(SACE_1613) or (SACE_1623) or (SACE_3095) or (SACE_5355)	SACE_1613,SACE_1623,SACE_3095,SACE_5355		Peptidoglycan biosynthesis	1	-1000	1000	0	2	6.3.1.2
r1170	undecaprenyldiphospho-muramoylpentapeptide beta-N-acetylglucosaminyltransferase	uagmda[c] + uacgam[c] <=> uaagtmad[c] + UDP[c]	(SACE_5851)	SACE_5851		Peptidoglycan biosynthesis	1	-1000	1000	0	2	2.4.1.227
r1171	glutamine synthetase	ATP[c] + uaagtmad[c] + NH3[c] <=> ADP[c] + Orthophosphate[c] + uaagtmda[c]	(SACE_1613) or (SACE_1623) or (SACE_3095) or (SACE_5355)	SACE_1613,SACE_1623,SACE_3095,SACE_5355		Peptidoglycan biosynthesis	1	-1000	1000	0	2	6.3.1.2
r1172	undecaprenyl pyrophosphate phosphatase	dtpcudcpp[c] + H2O[c] => udcpp[c] + Orthophosphate[c]	(SACE_3590)	SACE_3590		Peptidoglycan biosynthesis	0	0	1000	0	2	3.6.1.27
r1173	phospho-N-acetylmuramoyl-pentapeptide-transferase	uAgla[c] + udcpp[c] => UMP[c] + uaAgla[c]	(SACE_5854)	SACE_5854		Peptidoglycan biosynthesis	0	0	1000	0	2	2.7.8.13
r1174	phospho-N-acetylmuramoyl-pentapeptide-transferase	UDPMurAc(oyl-L-Ala-D-gamma-Glu-L-Lys-D-Ala-D-Ala)[c] + udcpp[c] => UMP[c] + uaGgla[c]	(SACE_5854)	SACE_5854		Peptidoglycan biosynthesis	0	0	1000	0	2	2.7.8.13
r1175	phospho-N-acetylmuramoyl-pentapeptide-transferase	UDP-N-acetylmuramoyl-L-alanyl-D-glutamyl-6-carboxy-L-lysyl-alaala[c] + udcpp[c] => UMP[c] + uagmda[c]	(SACE_5854)	SACE_5854		Peptidoglycan biosynthesis	0	0	1000	0	2	2.7.8.13
r1176	undecaprenyldiphospho-muramoylpentapeptide beta-N-acetylglucosaminyltransferase	uaGgla[c] + uacgam[c] => uaaGgla[c] + UDP[c]	(SACE_5851)	SACE_5851		Peptidoglycan biosynthesis	0	0	1000	0	2	2.4.1.227
r1177	N-acetylmuramoyl-L-alanine amidase	N-Acetylmuramoyl-Ala[c] + H2O[c] <=> N-Acetyl-D-muramoate[c] + L-Alanine[c]	(SACE_7386)	SACE_7386		Peptidoglycan biosynthesis	1	-1000	1000	0	2	3.5.1.28
r1178	beta-galactosidase	G13032[c] + H2O[c] => G06780[c] + D-Galactose[c]	(SACE_0306) or (SACE_1940) or (SACE_5154) or (SACE_6726)	SACE_0306,SACE_1940,SACE_5154,SACE_6726		Glycosaminoglycan degradation	0	0	1000	0	2	3.2.1.23
r1179	SACE_4791sulfatase	G06780[c] + H2O[c] => G13033[c] + Sulfate[c]	(SACE_4791)	SACE_4791		Glycosaminoglycan degradation	0	0	1000	0	2	3.1.6.14
r1180	beta-N-acetylglucosaminidase （putative secreted protein)	G13033[c] + H2O[c] => G08421[c] + N-Acetyl-D-galactosamine[c]	(SACE_0363) or (SACE_3851)	SACE_0363,SACE_3851		Glycosaminoglycan degradation	0	0	1000	0	2	3.2.1.52
r1181	beta-N-acetylglucosaminidase （putative secreted protein)	G06780[c] + H2O[c] => G08421[c] + N-Acetyl-D-galactosamine[c]	(SACE_0363) or (SACE_3851)	SACE_0363,SACE_3851		Glycosaminoglycan degradation	0	0	1000	0	2	3.2.1.52
r1182	SACE_4791sulfatase	G09660[c] + H2O[c] => G02632[c] + Sulfate[c]	(SACE_4791)	SACE_4791		Glycosaminoglycan degradation	0	0	1000	0	2	3.1.6.14
r1183	SACE_7066hypothetical protein	G13043[c] + H2O[c] => DWA-2[c] + N-Acetylgalactosamine[c]	(SACE_7066)	SACE_7066		Glycosaminoglycan degradation	0	0	1000	0	2	3.2.1.35
r1184	SACE_7066hypothetical protein	G12336[c] + H2O[c] => DWA-2[c] + acgal4s[c]	(SACE_7066)	SACE_7066		Glycosaminoglycan degradation	0	0	1000	0	2	3.2.1.35
r1185	enzyme not yet characterized	ggdp[c] + ipdp[c] <=> pendp[c] + Diphosphate[c]				Terpenoid backbone biosynthesis	1	-1000	1000	0	2	2.5.1.-	reaction added to complete menaquinone biosynthesis and energy metabolisn
r1186	hexaprenyl diphosphate synthase	pendp[c] + ipdp[c] <=> hexdp[c] + Diphosphate[c]				Terpenoid backbone biosynthesis	1	-1000	1000	0	2	2.5.1.33	reaction added to complete menaquinone biosynthesis and energy metabolisn
r1187	4-hydroxy-3-methylbut-2-enyl diphosphate reductase	h2mb4p[c] + NADH[c] + H[c] => dmpp[c] + NAD[c] + H2O[c]	(SACE_0939)	SACE_0939		Terpenoid backbone biosynthesis	0	0	1000	0	2	1.17.1.2	reaction added to complete synthesis of dimethylallyl PP
r1188	octaprenyl diphosphate synthase	hepdp[c] + ipdp[c] => octdp[c] + Diphosphate[c]				Terpenoid backbone biosynthesis	0	0	1000	0	2	2.5.1.-	reaction added to complete menaquinone biosynthesis and energy metabolisn
r1189	isopentenyl-diphosphate delta-isomerase II 2	ipdp[c] => dmpp[c]	(SACE_2627 and SACE_5210)	SACE_2627,SACE_5210		Terpenoid backbone biosynthesis	0	0	1000	0	2	5.3.3.2
r1190	SACE_3979dimethylallyltranstransferase / geranyltranstransferase / geranylgeranyl pyrophosphate synthetase	dmpp[c] + ipdp[c] <=> Diphosphate[c] + grdp[c]	(SACE_1714) or (SACE_3979) or (SACE_4328) or (SACE_4646) or (SACE_4909) or (SACE_5211) or (SACE_5289)	SACE_1714,SACE_3979,SACE_4328,SACE_4646,SACE_4909,SACE_5211,SACE_5289		Terpenoid backbone biosynthesis	1	-1000	1000	0	2	2.5.1.1 2.5.1.10 2.5.1.29
r1191	SACE_3979dimethylallyltranstransferase / geranyltranstransferase / geranylgeranyl pyrophosphate synthetase	grdp[c] + ipdp[c] <=> Diphosphate[c] + trans,trans-frdp[c]	(SACE_1714) or (SACE_3979) or (SACE_4328) or (SACE_4646) or (SACE_4909) or (SACE_5211) or (SACE_5289)	SACE_1714,SACE_3979,SACE_4328,SACE_4646,SACE_4909,SACE_5211,SACE_5289		Terpenoid backbone biosynthesis	1	-1000	1000	0	2	2.5.1.1 2.5.1.10 2.5.1.29
r1192	SACE_3979dimethylallyltranstransferase / geranyltranstransferase / geranylgeranyl pyrophosphate synthetase	trans,trans-frdp[c] + ipdp[c] <=> Diphosphate[c] + ggdp[c]	(SACE_1714) or (SACE_3979) or (SACE_4328) or (SACE_4646) or (SACE_4909) or (SACE_5211) or (SACE_5289)	SACE_1714,SACE_3979,SACE_4328,SACE_4646,SACE_4909,SACE_5211,SACE_5289		Terpenoid backbone biosynthesis	1	-1000	1000	0	2	2.5.1.1 2.5.1.10 2.5.1.29
r1193	putative undecaprenyl pyrophosphate synthetase	trans,trans-frdp[c] + 8 ipdp[c] => trans,trans,cis-ggdp[c] + 8 Diphosphate[c]	(SACE_0919) or (SACE_1494)	SACE_0919,SACE_1494		Terpenoid backbone biosynthesis	0	0	1000	0	2	2.5.1.31
r1194	SACE_6888polyprenyl diphosphate synthase component	hexdp[c] + ipdp[c] => hepdp[c] + Diphosphate[c]	(SACE_6888)	SACE_6888		Terpenoid backbone biosynthesis	0	0	1000	0	2	2.5.1.30
r1195	1-deoxy-xu5p_D reductoisomerase	1-Deoxy-xu5p_D[c] + NADPH[c] + H[c] => 2me4p[c] + NADP[c]	(SACE_5994)	SACE_5994		Terpenoid backbone biosynthesis	0	0	1000	0	2	1.1.1.267
r1196	4-diphosphocytidyl-2C-methyl-D-erythritol synthase	2me4p[c] + CTP[c] <=> 4c2me[c] + Diphosphate[c]	(SACE_0439)	SACE_0439		Terpenoid backbone biosynthesis	1	-1000	1000	0	2	2.7.7.60
r1197	4-diphosphocytidyl-2-C-methyl-D-erythritol kinase	4c2me[c] + ATP[c] <=> 2-Phospho-4c2me[c] + ADP[c]	(SACE_0807)	SACE_0807		Terpenoid backbone biosynthesis	1	-1000	1000	0	2	2.7.1.148
r1198	2mecdp synthase	2-Phospho-4c2me[c] <=> 2mecdp[c] + CMP[c]	(SACE_0440)	SACE_0440		Terpenoid backbone biosynthesis	1	-1000	1000	0	2	4.6.1.12
r1199	4-hydroxy-3-methylbut-2-enyl diphosphate reductase	h2mb4p[c] + NADPH[c] + H[c] <=> ipdp[c] + NADP[c] + H2O[c]	(SACE_0939) or (SACE_4326)	SACE_0939,SACE_4326		Terpenoid backbone biosynthesis	1	-1000	1000	0	2	1.17.7.4
r1200	4-hydroxy-3-methylbut-2-en-1-yl diphosphate synthase	2mecdp[c] + 2 fdxrd[c] <=> h2mb4p[c] + H2O[c] + 2 fdxox[c]	(SACE_5992)	SACE_5992		Terpenoid backbone biosynthesis	1	-1000	1000	0	2	1.17.7.1
r1201	SACE_2184lycopene cyclase, beta and epsilon	gamma-Carotene[c] <=> beta-Carotene[c]	(SACE_2184)	SACE_2184		Carotenoid biosynthesis - General	1	-1000	1000	0	2	1.14.-.-
r1202	phytoene desaturase	Phytoene[c] + Acceptor[c] <=> Phytofluene[c] + acceptor(reduced)[c]	(SACE_1713)	SACE_1713		Carotenoid biosynthesis - General	1	-1000	1000	0	2	1.14.99.-
r1203	phytoene desaturase	Phytofluene[c] + Acceptor[c] <=> zeta-Carotene[c] + acceptor(reduced)[c]	(SACE_1713)	SACE_1713		Carotenoid biosynthesis - General	1	-1000	1000	0	2	1.14.99.-
r1204	phytoene desaturase	zeta-Carotene[c] + acceptor(reduced)[c] + O2[c] <=> Neurosporene[c] + 2 H2O[c] + Acceptor[c]	(SACE_1713)	SACE_1713		Carotenoid biosynthesis - General	1	-1000	1000	0	2	1.14.99.-
r1205	phytoene desaturase	Neurosporene[c] + acceptor(reduced)[c] + O2[c] <=> Lycopene[c] + Acceptor[c] + 2 H2O[c]	(SACE_1713)	SACE_1713		Carotenoid biosynthesis - General	1	-1000	1000	0	2	1.14.99.-
r1206	SACE_2184lycopene cyclase, beta and epsilon	Neurosporene[c] <=> beta-Zeacarotene[c]	(SACE_2184)	SACE_2184		Carotenoid biosynthesis - General	1	-1000	1000	0	2	1.14.-.-
r1207	SACE_2184lycopene cyclase, beta and epsilon	Lycopene[c] <=> gamma-Carotene[c]	(SACE_2184)	SACE_2184		Carotenoid biosynthesis - General	1	-1000	1000	0	2	1.14.-.-
r1208	SACE_2184lycopene cyclase, beta and epsilon	delta-Carotene[c] <=> alpha-Carotene[c]	(SACE_2184)	SACE_2184		Carotenoid biosynthesis - General	1	-1000	1000	0	2	1.14.-.-
r1209	beta-carotene desaturase/methylase [SP:tr:A4FES1_SACEN]	gamma-Carotene[c] <=> Chlorobactene[c]	(SACE_3271)	SACE_3271		Carotenoid biosynthesis - General	1	-1000	1000	0	2	E_3271 crtU; beta-carotene desaturase/methylase [SP:tr:A4FES1_SACEN
r1210	SACE_2184lycopene cyclase, beta and epsilon	beta-Zeacarotene[c] <=> 7,8-Dihydro-beta-carotene[c]	(SACE_2184)	SACE_2184		Carotenoid biosynthesis - General	1	-1000	1000	0	2	1.14.-.-
r1211	beta-carotene desaturase/methylase [SP:tr:A4FES1_SACEN]	beta-Carotene[c] <=> beta-Isorenieratene[c]	(SACE_3271)	SACE_3271		Carotenoid biosynthesis - General	1	-1000	1000	0	2	E_3271 crtU; beta-carotene desaturase/methylase [SP:tr:A4FES1_SACEN
r1212	beta-carotene desaturase/methylase [SP:tr:A4FES1_SACEN]	beta-Isorenieratene[c] <=> Isorenieratene[c]	(SACE_3271)	SACE_3271		Carotenoid biosynthesis - General	1	-1000	1000	0	2	E_3271 crtU; beta-carotene desaturase/methylase [SP:tr:A4FES1_SACEN
r1213	putative phytoene synthase	ggdp[c] <=> Phytoene[c]	(SACE_3269) or (SACE_3539) or (SACE_4330)	SACE_3269,SACE_3539,SACE_4330		Carotenoid biosynthesis - General	1	-1000	1000	0	2	2.5.1.32
r1214	SACE_0343aldehyde dehydrogenase （NAD)	perillylald[c] + H2O[c] + NAD[c] <=> Perillic-acid[c] + NADH[c] + H[c]	(SACE_0343) or (SACE_1341) or (SACE_2377) or (SACE_2783) or (SACE_2915) or (SACE_3880) or (SACE_6014) or (SACE_6249) or (SACE_6565) or (SACE_6566)	SACE_0343,SACE_1341,SACE_2377,SACE_2783,SACE_2915,SACE_3880,SACE_6014,SACE_6249,SACE_6565,SACE_6566		Limonene and pinene degradation	1	-1000	1000	0	2	1.2.1.3
r1215	SACE_3052medium-chain acyl-CoA ligase	Perillic-acid[c] + CoA[c] + ATP[c] <=> Perillyl-CoA[c] + H2O[c] + ADP[c] + Orthophosphate[c]	(SACE_3052) or (SACE_6372) or (SACE_6950)	SACE_3052,SACE_6372,SACE_6950		Limonene and pinene degradation	1	-1000	1000	0	2	6.2.1.-
r1216	SACE_3052medium-chain acyl-CoA ligase	Perillic-acid[c] + CoA[c] + ATP[c] <=> Perillyl-CoA[c] + H2O[c] + AMP[c] + Diphosphate[c]	(SACE_3052) or (SACE_6372) or (SACE_6950)	SACE_3052,SACE_6372,SACE_6950		Limonene and pinene degradation	0	0	0	0	2	6.2.1.-
r1217	SACE_3052medium-chain acyl-CoA ligase	(3R)-3-Isopropenyl-6-oxoheptanoate[c] + CoA[c] + ATP[c] <=> (3R)-3-Isopropenyl-6-oxoheptanoyl-CoA[c] + H2O[c] + ADP[c] + Orthophosphate[c]	(SACE_3052) or (SACE_6372) or (SACE_6950)	SACE_3052,SACE_6372,SACE_6950		Limonene and pinene degradation	1	-1000	1000	0	2	6.2.1.-
r1218	SACE_3052medium-chain acyl-CoA ligase	(3S)-3-Isopropenyl-6-oxoheptanoate[c] <=> (3S)-3-Isopropenyl-6-oxoheptanoyl-CoA[c]	(SACE_3052) or (SACE_6372) or (SACE_6950)	SACE_3052,SACE_6372,SACE_6950		Limonene and pinene degradation	1	-1000	1000	0	2	6.2.1.-
r1219	SACE_1671PheA/TfdB family FAD-binding monooxygenase	Limonene[c] + NADH[c] + O2[c] <=> Limonene-1,2-epoxide[c] + NAD[c] + HO[c]	(SACE_1671) or (SACE_3584) or (SACE_6561)	SACE_1671,SACE_3584,SACE_6561		Limonene and pinene degradation	1	-1000	1000	0	2	1.14.13.-
r1220	SACE_1671PheA/TfdB family FAD-binding monooxygenase	(1S,4R)-1-Hydroxy-2-oxolimonene[c] + NADPH[c] + O2[c] <=> (3R)-3-Isopropenyl-6-oxoheptanoate[c] + NADP[c] + HO[c]	(SACE_1671) or (SACE_3584) or (SACE_6561)	SACE_1671,SACE_3584,SACE_6561		Limonene and pinene degradation	1	-1000	1000	0	2	1.14.13.-
r1221	cytochrome P450-like enzyme	alpha-Pinene[c] + acceptor(reduced)[c] <=> Myrtenol[c] + H2O[c] + Acceptor[c]	(SACE_0229) or (SACE_0651) or (SACE_0730) or (SACE_1158) or (SACE_1426) or (SACE_2622) or (SACE_2631) or (SACE_3308) or (SACE_4142) or (SACE_4562) or (SACE_4818) or (SACE_5814) or (SACE_5939) or (SACE_6112)	SACE_0229,SACE_0651,SACE_0730,SACE_1158,SACE_1426,SACE_2622,SACE_2631,SACE_3308,SACE_4142,SACE_4562,SACE_4818,SACE_5814,SACE_5939,SACE_6112		Limonene and pinene degradation	1	-1000	1000	0	2	1.14.-.-
r1222	cytochrome P450-like enzyme	alpha-Pinene[c] + O2[c] + H[c] <=> Pinocarveol[c] + H2O[c]	(SACE_0229) or (SACE_0651) or (SACE_0730) or (SACE_1158) or (SACE_1426) or (SACE_2622) or (SACE_2631) or (SACE_3308) or (SACE_4142) or (SACE_4562) or (SACE_4818) or (SACE_5814) or (SACE_5939) or (SACE_6112)	SACE_0229,SACE_0651,SACE_0730,SACE_1158,SACE_1426,SACE_2622,SACE_2631,SACE_3308,SACE_4142,SACE_4562,SACE_4818,SACE_5814,SACE_5939,SACE_6112		Limonene and pinene degradation	1	-1000	1000	0	2	1.14.-.-
r1223	SACE_1671PheA/TfdB family FAD-binding monooxygenase	alpha-Pinene[c] + NADH[c] + H[c] + O2[c] <=> alpha-Pinene-oxide[c] + NAD[c] + H2O[c]	(SACE_1671) or (SACE_3584) or (SACE_6561)	SACE_1671,SACE_3584,SACE_6561		Limonene and pinene degradation	1	-1000	1000	0	2	1.14.13.-
r1224	SACE_3052medium-chain acyl-CoA ligase	cis-2-Methyl-5-isopropylhexa-2,5-dienoic-acid[c] + ATP[c] + CoA[c] <=> cis-2-Methyl-5-isopropylhexa-2,5-dienoyl-CoA[c] + AMP[c] + Diphosphate[c]	(SACE_3052) or (SACE_6372) or (SACE_6950)	SACE_3052,SACE_6372,SACE_6950		Limonene and pinene degradation	1	-1000	1000	0	2	6.2.1.-
r1225	SACE_3052medium-chain acyl-CoA ligase	trans-2-Methyl-5-isopropylhexa-2,5-dienoic-acid[c] + ATP[c] + CoA[c] <=> trans-2-Methyl-5-isopropylhexa-2,5-dienoyl-CoA[c] + AMP[c] + Diphosphate[c]	(SACE_3052) or (SACE_6372) or (SACE_6950)	SACE_3052,SACE_6372,SACE_6950		Limonene and pinene degradation	1	-1000	1000	0	2	6.2.1.-
r1226	putative enoyl-CoA hydratase/isomerase family protein	cis-2-Methyl-5-isopropylhexa-2,5-dienoyl-CoA[c] + H2O[c] <=> 3-Hydroxy-2,6-dimethyl-5-methylene-heptanoyl-CoA[c]	(SACE_1028) or (SACE_1458) or (SACE_1464) or (SACE_2748) or (SACE_2794) or (SACE_3018) or (SACE_3084) or (SACE_3132) or (SACE_3450) or (SACE_3745) or (SACE_3868 ) or (SACE_3989) or (SACE_4015) or (SACE_4571) or (SACE_4787) or (SACE_5406) or (SACE_6207) or (SACE_6362)	SACE_1028,SACE_1458,SACE_1464,SACE_2748,SACE_2794,SACE_3018,SACE_3084,SACE_3132,SACE_3450,SACE_3745,SACE_3868 ,SACE_3989,SACE_4015,SACE_4571,SACE_4787,SACE_5406,SACE_6207,SACE_6362		Limonene and pinene degradation	1	-1000	1000	0	2	4.2.1.17
r1227	putative enoyl-CoA hydratase/isomerase family protein	trans-2-Methyl-5-isopropylhexa-2,5-dienoyl-CoA[c] + H2O[c] <=> 3-Hydroxy-2,6-dimethyl-5-methylene-heptanoyl-CoA[c]	(SACE_1028) or (SACE_1458) or (SACE_1464) or (SACE_2748) or (SACE_2794) or (SACE_3018) or (SACE_3084) or (SACE_3132) or (SACE_3450) or (SACE_3745) or (SACE_3868 ) or (SACE_3989) or (SACE_4015) or (SACE_4571) or (SACE_4787) or (SACE_5406) or (SACE_6207) or (SACE_6362)	SACE_1028,SACE_1458,SACE_1464,SACE_2748,SACE_2794,SACE_3018,SACE_3084,SACE_3132,SACE_3450,SACE_3745,SACE_3868 ,SACE_3989,SACE_4015,SACE_4571,SACE_4787,SACE_5406,SACE_6207,SACE_6362		Limonene and pinene degradation	1	-1000	1000	0	2	4.2.1.17
r1228	SACE_5883N-acetylglutamate synthase	2,6-Dimethyl-5-methylene-3-oxo-heptanoyl-CoA[c] + CoA[c] <=> 3-Isopropylbut-3-enoyl-CoA[c] + Propanoyl-CoA[c]	(SACE_5883) or (SACE_5884) or (SACE_6204)	SACE_5883,SACE_5884,SACE_6204		Limonene and pinene degradation	1	-1000	1000	0	2	2.3.1.-
r1229	thioesterase	3-Isopropylbut-3-enoyl-CoA[c] + H2O[c] <=> 3-Isopropylbut-3-enoic-acid[c] + CoA[c]	(SACE_4921)	SACE_4921		Limonene and pinene degradation	1	-1000	1000	0	2	3.1.2.-
r1230	SACE_3052medium-chain acyl-CoA ligase	(3R)-3-Isopropenyl-6-oxoheptanoate[c] + CoA[c] + ATP[c] <=> (3R)-3-Isopropenyl-6-oxoheptanoyl-CoA[c] + H2O[c] + AMP[c] + Diphosphate[c]	(SACE_3052) or (SACE_6372) or (SACE_6950)	SACE_3052,SACE_6372,SACE_6950		Limonene and pinene degradation	0	0	0	0	2	6.2.1.-
r1231	SACE_3052medium-chain acyl-CoA ligase	Citronellate[c] + CoA[c] + ATP[c] <=> Citronellyl-CoA[c] + AMP[c] + Diphosphate[c]	(SACE_3052) or (SACE_6372) or (SACE_6950)	SACE_3052,SACE_6372,SACE_6950		Geraniol degradation	1	-1000	1000	0	2	6.2.1.-
r1232	acyl-CoA dehydrogenase	Citronellyl-CoA[c] + Acceptor[c] <=> Geranoyl-CoA[c] + acceptor(reduced)[c]	(SACE_0645) or (SACE_1457) or (SACE_3133) or (SACE_3243) or (SACE_3566) or (SACE_3580) or (SACE_4005) or (SACE_4589) or (SACE_5041) or (SACE_5168) or (SACE_5383) or (SACE_7242)	SACE_0645,SACE_1457,SACE_3133,SACE_3243,SACE_3566,SACE_3580,SACE_4005,SACE_4589,SACE_5041,SACE_5168,SACE_5383,SACE_7242		Geraniol degradation	1	-1000	1000	0	2	1.3.99.-
r1233	SACE_1824acetyl-coa acetyltransferase （thiolase)	7-Methyl-3-oxo-6-octenoyl-CoA[c] + CoA[c] <=> 5-Methylhex-4-enoyl-CoA[c] + Acetyl-CoA[c]	(SACE_1824) or (SACE_3994)	SACE_1824,SACE_3994		Geraniol degradation	1	-1000	1000	0	2	2.3.1.16
r1234	acyl-CoA dehydrogenase	5-Methylhex-4-enoyl-CoA[c] + FAD[c] <=> (2E)-5-Methylhexa-2,4-dienoyl-CoA[c] + FADH2[c]	(SACE_0645) or (SACE_1457) or (SACE_3133) or (SACE_3243) or (SACE_3566) or (SACE_3580) or (SACE_4005) or (SACE_4589) or (SACE_5041) or (SACE_5168) or (SACE_5383) or (SACE_7242)	SACE_0645,SACE_1457,SACE_3133,SACE_3243,SACE_3566,SACE_3580,SACE_4005,SACE_4589,SACE_5041,SACE_5168,SACE_5383,SACE_7242		Geraniol degradation	1	-1000	1000	0	2	1.3.99.-
r1235	putative enoyl-CoA hydratase/isomerase family protein	(2E)-5-Methylhexa-2,4-dienoyl-CoA[c] + H2O[c] <=> 3-Hydroxy-5-methylhex-4-enoyl-CoA[c]	(SACE_1028) or (SACE_1458) or (SACE_1464) or (SACE_2748) or (SACE_2794) or (SACE_3018) or (SACE_3084) or (SACE_3132) or (SACE_3450) or (SACE_3745) or (SACE_3868 ) or (SACE_3989) or (SACE_4015) or (SACE_4571) or (SACE_4787) or (SACE_5406) or (SACE_6207) or (SACE_6362)	SACE_1028,SACE_1458,SACE_1464,SACE_2748,SACE_2794,SACE_3018,SACE_3084,SACE_3132,SACE_3450,SACE_3745,SACE_3868 ,SACE_3989,SACE_4015,SACE_4571,SACE_4787,SACE_5406,SACE_6207,SACE_6362		Geraniol degradation	1	-1000	1000	0	2	4.2.1.17
r1236	SACE_0092short-chain dehydrogenase/reductase SDR	3-Hydroxy-5-methylhex-4-enoyl-CoA[c] + NAD[c] <=> 5-Methyl-3-oxo-4-hexenoyl-CoA[c] + NADH[c] + H[c]	(SACE_0092) or (SACE_1823) or (SACE_2849) or (SACE_3445) or (SACE_3866) or (SACE_6362)	SACE_0092,SACE_1823,SACE_2849,SACE_3445,SACE_3866,SACE_6362		Geraniol degradation	1	-1000	1000	0	2	1.1.1.35
r1237	SACE_1824acetyl-coa acetyltransferase （thiolase)	5-Methyl-3-oxo-4-hexenoyl-CoA[c] + CoA[c] <=> 3-Methylcrotonyl-CoA[c] + Acetyl-CoA[c]	(SACE_1824) or (SACE_3994)	SACE_1824,SACE_3994		Geraniol degradation	1	-1000	1000	0	2	2.3.1.16
r1238	acetyl-CoA hydrolase/transferase	gera[c] + CoA[c] <=> trans-Geranyl-CoA[c] + H2O[c]	(SACE_5861)	SACE_5861		Geraniol degradation	1	-1000	1000	0	2	2.8.3.-
r1239	propanoyl-CoA:methylmalonyl-CoA malonyltransferase (cyclizing) propanoyl-CoA:methylmalonyl-CoA 2-C-acyltransferase (decarboxylating, oxoacyl-reducing and cyclizing) Malonyl-CoA:propionyl-CoA malonyltransfersase (cyclizing)	6 (S)-Methylmalonyl-CoA[c] + Propanoyl-CoA[c] + 6 NADPH[c] + 6 H[c] <=> 7 CoA[c] + 6-Deoxyerythronolide-B[c] + 6 CO2[c] + 6 NADP[c] + H2O[c]	(SACE_0712 and SACE_0713 and SACE_0714 and SACE_0715 and SACE_0716 and SACE_0717 and SACE_0718 and SACE_0719 and SACE_0720 and SACE_0721 and SACE_0722 and SACE_0723 and SACE_0724 and SACE_0725 and SACE_0726 and SACE_0727 and SACE_0728 and SACE_0729 and SACE_0730 and SACE_0731 and SACE_0732 and SACE_0733 and SACE_0734)	SACE_0712,SACE_0713,SACE_0714,SACE_0715,SACE_0716,SACE_0717,SACE_0718,SACE_0719,SACE_0720,SACE_0721,SACE_0722,SACE_0723,SACE_0724,SACE_0725,SACE_0726,,SACE_0727,SACE_0728,SACE_0729,SACE_0730,SACE_0731,SACE_0732,SACE_0733,SACE_0734		Biosynthesis of 12-, 14- and 16-membered macrolides	1	-1000	1000	0	2	2.3.1.94	reaction added for ErythBiosynthesis
r1240		6-Deoxyerythronolide-B[c] + O2[c] <=> Erythronolide-B[c]	(SACE_0712 and SACE_0713 and SACE_0714 and SACE_0715 and SACE_0716 and SACE_0717 and SACE_0718 and SACE_0719 and SACE_0720 and SACE_0721 and SACE_0722 and SACE_0723 and SACE_0724 and SACE_0725 and SACE_0726 and SACE_0727 and SACE_0728 and SACE_0729 and SACE_0730 and SACE_0731 and SACE_0732 and SACE_0733 and SACE_0734)	SACE_0712,SACE_0713,SACE_0714,SACE_0715,SACE_0716,SACE_0717,SACE_0718,SACE_0719,SACE_0720,SACE_0721,SACE_0722,SACE_0723,SACE_0724,SACE_0725,SACE_0726,,SACE_0727,SACE_0728,SACE_0729,SACE_0730,SACE_0731,SACE_0732,SACE_0733,SACE_0734		Biosynthesis of 12-, 14- and 16-membered macrolides	1	-1000	1000	0	2	1.-.-.-	reaction added for ErythBiosynthesis
r1241	dTDP-L-mycarose:erythronolide-B 3-O-alpha-mycarosyltransferase	Erythronolide-B[c] + dTDP-L-mycarose[c] => 3-O-MycarosylErythronolide-B[c] + dTDP[c]	(SACE_0712 and SACE_0713 and SACE_0714 and SACE_0715 and SACE_0716 and SACE_0717 and SACE_0718 and SACE_0719 and SACE_0720 and SACE_0721 and SACE_0722 and SACE_0723 and SACE_0724 and SACE_0725 and SACE_0726 and SACE_0727 and SACE_0728 and SACE_0729 and SACE_0730 and SACE_0731 and SACE_0732 and SACE_0733 and SACE_0734)	SACE_0712,SACE_0713,SACE_0714,SACE_0715,SACE_0716,SACE_0717,SACE_0718,SACE_0719,SACE_0720,SACE_0721,SACE_0722,SACE_0723,SACE_0724,SACE_0725,SACE_0726,,SACE_0727,SACE_0728,SACE_0729,SACE_0730,SACE_0731,SACE_0732,SACE_0733,SACE_0734		Biosynthesis of 12-, 14- and 16-membered macrolides	0	0	1000	0	2	2.4.1.-	reaction added for ErythBiosynthesis
r1242	dTDP-D-desosamine:3-O-mycarosylerythronolide-B 5-O-beta-D-desosaminyltransferase	dTDP-D-desosamine[c] + 3-O-MycarosylErythronolide-B[c] <=> ErythD[c] + dTDP[c]	(SACE_0712 and SACE_0713 and SACE_0714 and SACE_0715 and SACE_0716 and SACE_0717 and SACE_0718 and SACE_0719 and SACE_0720 and SACE_0721 and SACE_0722 and SACE_0723 and SACE_0724 and SACE_0725 and SACE_0726 and SACE_0727 and SACE_0728 and SACE_0729 and SACE_0730 and SACE_0731 and SACE_0732 and SACE_0733 and SACE_0734)	SACE_0712,SACE_0713,SACE_0714,SACE_0715,SACE_0716,SACE_0717,SACE_0718,SACE_0719,SACE_0720,SACE_0721,SACE_0722,SACE_0723,SACE_0724,SACE_0725,SACE_0726,,SACE_0727,SACE_0728,SACE_0729,SACE_0730,SACE_0731,SACE_0732,SACE_0733,SACE_0734		Biosynthesis of 12-, 14- and 16-membered macrolides	1	-1000	1000	0	2	2.4.1.-	reaction added for ErythBiosynthesis
r1243		ErythD[c] + amet[c] => ErythB[c] + ahcys[c]	(SACE_0712 and SACE_0713 and SACE_0714 and SACE_0715 and SACE_0716 and SACE_0717 and SACE_0718 and SACE_0719 and SACE_0720 and SACE_0721 and SACE_0722 and SACE_0723 and SACE_0724 and SACE_0725 and SACE_0726 and SACE_0727 and SACE_0728 and SACE_0729 and SACE_0730 and SACE_0731 and SACE_0732 and SACE_0733 and SACE_0734)	SACE_0712,SACE_0713,SACE_0714,SACE_0715,SACE_0716,SACE_0717,SACE_0718,SACE_0719,SACE_0720,SACE_0721,SACE_0722,SACE_0723,SACE_0724,SACE_0725,SACE_0726,,SACE_0727,SACE_0728,SACE_0729,SACE_0730,SACE_0731,SACE_0732,SACE_0733,SACE_0734		Biosynthesis of 12-, 14- and 16-membered macrolides	0	0	1000	0	2		reaction added for ErythBiosynthesis
r1244		ErythD[c] => ErythC[c]	(SACE_0712 and SACE_0713 and SACE_0714 and SACE_0715 and SACE_0716 and SACE_0717 and SACE_0718 and SACE_0719 and SACE_0720 and SACE_0721 and SACE_0722 and SACE_0723 and SACE_0724 and SACE_0725 and SACE_0726 and SACE_0727 and SACE_0728 and SACE_0729 and SACE_0730 and SACE_0731 and SACE_0732 and SACE_0733 and SACE_0734)	SACE_0712,SACE_0713,SACE_0714,SACE_0715,SACE_0716,SACE_0717,SACE_0718,SACE_0719,SACE_0720,SACE_0721,SACE_0722,SACE_0723,SACE_0724,SACE_0725,SACE_0726,,SACE_0727,SACE_0728,SACE_0729,SACE_0730,SACE_0731,SACE_0732,SACE_0733,SACE_0734		Biosynthesis of 12-, 14- and 16-membered macrolides	0	0	1000	0	2		reaction added for ErythBiosynthesis
r1245		ErythB[c] => Erythromycin[c]	(SACE_0712 and SACE_0713 and SACE_0714 and SACE_0715 and SACE_0716 and SACE_0717 and SACE_0718 and SACE_0719 and SACE_0720 and SACE_0721 and SACE_0722 and SACE_0723 and SACE_0724 and SACE_0725 and SACE_0726 and SACE_0727 and SACE_0728 and SACE_0729 and SACE_0730 and SACE_0731 and SACE_0732 and SACE_0733 and SACE_0734)	SACE_0712,SACE_0713,SACE_0714,SACE_0715,SACE_0716,SACE_0717,SACE_0718,SACE_0719,SACE_0720,SACE_0721,SACE_0722,SACE_0723,SACE_0724,SACE_0725,SACE_0726,,SACE_0727,SACE_0728,SACE_0729,SACE_0730,SACE_0731,SACE_0732,SACE_0733,SACE_0734		Biosynthesis of 12-, 14- and 16-membered macrolides	0	0	1000	0	2		reaction added for ErythBiosynthesis
r1246		ErythC[c] + amet[c] => Erythromycin[c] + ahcys[c]	(SACE_0712 and SACE_0713 and SACE_0714 and SACE_0715 and SACE_0716 and SACE_0717 and SACE_0718 and SACE_0719 and SACE_0720 and SACE_0721 and SACE_0722 and SACE_0723 and SACE_0724 and SACE_0725 and SACE_0726 and SACE_0727 and SACE_0728 and SACE_0729 and SACE_0730 and SACE_0731 and SACE_0732 and SACE_0733 and SACE_0734)	SACE_0712,SACE_0713,SACE_0714,SACE_0715,SACE_0716,SACE_0717,SACE_0718,SACE_0719,SACE_0720,SACE_0721,SACE_0722,SACE_0723,SACE_0724,SACE_0725,SACE_0726,,SACE_0727,SACE_0728,SACE_0729,SACE_0730,SACE_0731,SACE_0732,SACE_0733,SACE_0734		Biosynthesis of 12-, 14- and 16-membered macrolides	0	0	1000	0	2		reaction added for ErythBiosynthesis
r1247	xylose isomerase	Kanosamine6p[c] <=> aminof6p[c]	(SACE_4105)	SACE_4105		Biosynthesis of ansamycins	1	-1000	1000	0	2	5.3.1.-
r1248	transketolase	aminof6p[c] + r5p_D[c] <=> iminoe4p[c] + s7p[c]	(SACE_2160) or (SACE_3326) or (SACE_4350 and SACE_4351) or (SACE_5763)	SACE_2160,SACE_3326,SACE_4350,SACE_4351,SACE_5763		Biosynthesis of ansamycins	1	-1000	1000	0	2	2.2.1.1
r1249	dTDP-4-deoxyglucose 3,5-epimerase	4,6-Dideoxy-4-oxo-dTDP-D-glucose[c] => GDP-4-dehydro-6-deoxy-L-mannose[c]	(SACE_0714) or (SACE_6416)	SACE_0714,SACE_6416		Polyketide sugar unit biosynthesis	0	0	1000	0	2	5.1.3.13
r1250	glucose-1-phosphate thymidylyltransferase	dTTP[c] + g1p[c] => Diphosphate[c] + dTDP-glucose[c]	(SACE_6883)	SACE_6883		Polyketide sugar unit biosynthesis	0	0	1000	0	2	2.7.7.24
r1251	dTDP-4-dehydrorhamnose reductase	dTDP-6-deoxy-L-mannose[c] + NADP[c] => dtdp4d6dm[c] + NADPH[c] + H[c]	(SACE_6479)	SACE_6479		Polyketide sugar unit biosynthesis	0	0	1000	0	2	1.1.1.133
r1252	SACE_5581NAD-dependent epimerase/dehydratase	dTDP-glucose[c] => 4,6-Dideoxy-4-oxo-dTDP-D-glucose[c] + H2O[c]	(SACE_5581) or (SACE_6480)	SACE_5581,SACE_6480		Polyketide sugar unit biosynthesis	0	0	1000	0	2	4.2.1.46
r1253	dTDP-4-deoxyglucose 3,5-epimerase	4,6-Dideoxy-4-oxo-dTDP-D-glucose[c] => dtdp4d6dm[c]	(SACE_0714) or (SACE_6416)	SACE_0714,SACE_6416		Polyketide sugar unit biosynthesis	0	0	1000	0	2	5.1.3.13
r1254	dTDP-4-amino-4,6-dideoxy-D-glucose:2-oxoglutarate aminotransferase	4,6-Dideoxy-4-oxo-dTDP-D-glucose[c] + L-Glutamate[c] => dTDP-4-amino-4,6-dideoxy-D-glucose[c] + 2-Oxoglutarate[c]	(SACE_0712 and SACE_0713 and SACE_0714 and SACE_0715 and SACE_0716 and SACE_0717 and SACE_0718 and SACE_0719 and SACE_0720 and SACE_0721 and SACE_0722 and SACE_0723 and SACE_0724 and SACE_0725 and SACE_0726 and SACE_0727 and SACE_0728 and SACE_0729 and SACE_0730 and SACE_0731 and SACE_0732 and SACE_0733 and SACE_0734)	SACE_0712,SACE_0713,SACE_0714,SACE_0715,SACE_0716,SACE_0717,SACE_0718,SACE_0719,SACE_0720,SACE_0721,SACE_0722,SACE_0723,SACE_0724,SACE_0725,SACE_0726,,SACE_0727,SACE_0728,SACE_0729,SACE_0730,SACE_0731,SACE_0732,SACE_0733,SACE_0734		Polyketide sugar unit biosynthesis	0	0	1000	0	2		reaction added for ErythBiosynthesis
r1255	dTDP-4-amino-4,6-dideoxy-D-glucose ammonia-lyase （dTDP-3-oxo-4,6-dideoxy-D-glucose-forming)	dTDP-4-amino-4,6-dideoxy-D-glucose[c] <=> dTDP-3-oxo-4,6-dideoxy-D-glucose[c] + NH3[c]	(SACE_0712 and SACE_0713 and SACE_0714 and SACE_0715 and SACE_0716 and SACE_0717 and SACE_0718 and SACE_0719 and SACE_0720 and SACE_0721 and SACE_0722 and SACE_0723 and SACE_0724 and SACE_0725 and SACE_0726 and SACE_0727 and SACE_0728 and SACE_0729 and SACE_0730 and SACE_0731 and SACE_0732 and SACE_0733 and SACE_0734)	SACE_0712,SACE_0713,SACE_0714,SACE_0715,SACE_0716,SACE_0717,SACE_0718,SACE_0719,SACE_0720,SACE_0721,SACE_0722,SACE_0723,SACE_0724,SACE_0725,SACE_0726,,SACE_0727,SACE_0728,SACE_0729,SACE_0730,SACE_0731,SACE_0732,SACE_0733,SACE_0734		Polyketide sugar unit biosynthesis	1	-1000	1000	0	2	4.3.1.-	reaction added for ErythBiosynthesis
r1256	dTDP-3-amino-3,4,6-trideoxy-D-glucose:2-oxoglutarate aminotransferase	dTDP-3-oxo-4,6-dideoxy-D-glucose[c] + L-Glutamate[c] <=> dTDP-3-amino-3,4,6-trideoxy-D-glucose[c] + 2-Oxoglutarate[c]	(SACE_0712 and SACE_0713 and SACE_0714 and SACE_0715 and SACE_0716 and SACE_0717 and SACE_0718 and SACE_0719 and SACE_0720 and SACE_0721 and SACE_0722 and SACE_0723 and SACE_0724 and SACE_0725 and SACE_0726 and SACE_0727 and SACE_0728 and SACE_0729 and SACE_0730 and SACE_0731 and SACE_0732 and SACE_0733 and SACE_0734)	SACE_0712,SACE_0713,SACE_0714,SACE_0715,SACE_0716,SACE_0717,SACE_0718,SACE_0719,SACE_0720,SACE_0721,SACE_0722,SACE_0723,SACE_0724,SACE_0725,SACE_0726,,SACE_0727,SACE_0728,SACE_0729,SACE_0730,SACE_0731,SACE_0732,SACE_0733,SACE_0734		Polyketide sugar unit biosynthesis	1	-1000	1000	0	2	2.6.1.-	reaction added for ErythBiosynthesis
r1257	amet:dTDP-3-amino-3,4,6-trideoxy-D-glucose N-methyltransferase （dTDP-D-desosamine-forming)	dTDP-3-amino-3,4,6-trideoxy-D-glucose[c] + 2 amet[c] <=> dTDP-D-desosamine[c] + 2 ahcys[c]	(SACE_0712 and SACE_0713 and SACE_0714 and SACE_0715 and SACE_0716 and SACE_0717 and SACE_0718 and SACE_0719 and SACE_0720 and SACE_0721 and SACE_0722 and SACE_0723 and SACE_0724 and SACE_0725 and SACE_0726 and SACE_0727 and SACE_0728 and SACE_0729 and SACE_0730 and SACE_0731 and SACE_0732 and SACE_0733 and SACE_0734)	SACE_0712,SACE_0713,SACE_0714,SACE_0715,SACE_0716,SACE_0717,SACE_0718,SACE_0719,SACE_0720,SACE_0721,SACE_0722,SACE_0723,SACE_0724,SACE_0725,SACE_0726,,SACE_0727,SACE_0728,SACE_0729,SACE_0730,SACE_0731,SACE_0732,SACE_0733,SACE_0734		Polyketide sugar unit biosynthesis	1	-1000	1000	0	2	2.1.1.-	reaction added for ErythBiosynthesis
r1258	2,3-dehydratase,TylX3 TylC6 EryB6 AveB6 MegT OleV	4,6-Dideoxy-4-oxo-dTDP-D-glucose[c] <=> dTDP-2,6-dideoxy-D-glycero-hex-2-enos-4-ulose[c] + H2O[c]	(SACE_0712 and SACE_0713 and SACE_0714 and SACE_0715 and SACE_0716 and SACE_0717 and SACE_0718 and SACE_0719 and SACE_0720 and SACE_0721 and SACE_0722 and SACE_0723 and SACE_0724 and SACE_0725 and SACE_0726 and SACE_0727 and SACE_0728 and SACE_0729 and SACE_0730 and SACE_0731 and SACE_0732 and SACE_0733 and SACE_0734)	SACE_0712,SACE_0713,SACE_0714,SACE_0715,SACE_0716,SACE_0717,SACE_0718,SACE_0719,SACE_0720,SACE_0721,SACE_0722,SACE_0723,SACE_0724,SACE_0725,SACE_0726,,SACE_0727,SACE_0728,SACE_0729,SACE_0730,SACE_0731,SACE_0732,SACE_0733,SACE_0734		Polyketide sugar unit biosynthesis	1	-1000	1000	0	2		reaction added for ErythBiosynthesis
r1259	3-oxoreductase,EryB2 TylC2	dTDP-2,6-dideoxy-D-glycero-hex-2-enos-4-ulose[c] + NADPH[c] + H[c] <=> dTDP-4-oxo-2,6-dideoxy-D-allose[c] + NADP[c]	(SACE_0712 and SACE_0713 and SACE_0714 and SACE_0715 and SACE_0716 and SACE_0717 and SACE_0718 and SACE_0719 and SACE_0720 and SACE_0721 and SACE_0722 and SACE_0723 and SACE_0724 and SACE_0725 and SACE_0726 and SACE_0727 and SACE_0728 and SACE_0729 and SACE_0730 and SACE_0731 and SACE_0732 and SACE_0733 and SACE_0734)	SACE_0712,SACE_0713,SACE_0714,SACE_0715,SACE_0716,SACE_0717,SACE_0718,SACE_0719,SACE_0720,SACE_0721,SACE_0722,SACE_0723,SACE_0724,SACE_0725,SACE_0726,,SACE_0727,SACE_0728,SACE_0729,SACE_0730,SACE_0731,SACE_0732,SACE_0733,SACE_0734		Polyketide sugar unit biosynthesis	1	-1000	1000	0	2		reaction added for ErythBiosynthesis
r1260		dTDP-4-oxo-2,6-dideoxy-D-allose[c] => dTDP-4-oxo-2,6-dideoxy-L-mannose[c]	(SACE_0712 and SACE_0713 and SACE_0714 and SACE_0715 and SACE_0716 and SACE_0717 and SACE_0718 and SACE_0719 and SACE_0720 and SACE_0721 and SACE_0722 and SACE_0723 and SACE_0724 and SACE_0725 and SACE_0726 and SACE_0727 and SACE_0728 and SACE_0729 and SACE_0730 and SACE_0731 and SACE_0732 and SACE_0733 and SACE_0734)	SACE_0712,SACE_0713,SACE_0714,SACE_0715,SACE_0716,SACE_0717,SACE_0718,SACE_0719,SACE_0720,SACE_0721,SACE_0722,SACE_0723,SACE_0724,SACE_0725,SACE_0726,,SACE_0727,SACE_0728,SACE_0729,SACE_0730,SACE_0731,SACE_0732,SACE_0733,SACE_0734		Polyketide sugar unit biosynthesis	0	0	1000	0	2		reaction added for ErythBiosynthesis
r1261	amet:dTDP-4-oxo-2,6-dideoxy-L-mannose 3-C-methyltransferase	dTDP-4-oxo-2,6-dideoxy-L-mannose[c] + amet[c] <=> dTDP-3-methyl-4-oxo-2,6-dideoxy-L-glucose[c] + ahcys[c] + H[c]	(SACE_0712 and SACE_0713 and SACE_0714 and SACE_0715 and SACE_0716 and SACE_0717 and SACE_0718 and SACE_0719 and SACE_0720 and SACE_0721 and SACE_0722 and SACE_0723 and SACE_0724 and SACE_0725 and SACE_0726 and SACE_0727 and SACE_0728 and SACE_0729 and SACE_0730 and SACE_0731 and SACE_0732 and SACE_0733 and SACE_0734)	SACE_0712,SACE_0713,SACE_0714,SACE_0715,SACE_0716,SACE_0717,SACE_0718,SACE_0719,SACE_0720,SACE_0721,SACE_0722,SACE_0723,SACE_0724,SACE_0725,SACE_0726,,SACE_0727,SACE_0728,SACE_0729,SACE_0730,SACE_0731,SACE_0732,SACE_0733,SACE_0734		Polyketide sugar unit biosynthesis	1	-1000	1000	0	2	2.1.1.-	reaction added for ErythBiosynthesis
r1262	dTDP-L-mycarose:NADP 4-oxidoreductase	dTDP-3-methyl-4-oxo-2,6-dideoxy-L-glucose[c] + NADPH[c] + H[c] <=> dTDP-L-mycarose[c] + NADP[c]	(SACE_0712 and SACE_0713 and SACE_0714 and SACE_0715 and SACE_0716 and SACE_0717 and SACE_0718 and SACE_0719 and SACE_0720 and SACE_0721 and SACE_0722 and SACE_0723 and SACE_0724 and SACE_0725 and SACE_0726 and SACE_0727 and SACE_0728 and SACE_0729 and SACE_0730 and SACE_0731 and SACE_0732 and SACE_0733 and SACE_0734)	SACE_0712,SACE_0713,SACE_0714,SACE_0715,SACE_0716,SACE_0717,SACE_0718,SACE_0719,SACE_0720,SACE_0721,SACE_0722,SACE_0723,SACE_0724,SACE_0725,SACE_0726,,SACE_0727,SACE_0728,SACE_0729,SACE_0730,SACE_0731,SACE_0732,SACE_0733,SACE_0734		Polyketide sugar unit biosynthesis	1	-1000	1000	0	2	1.1.1.-	reaction added for ErythBiosynthesis
r1263	23ddhb dehydrogenase	(2S,3S)-23ddhb[c] + NAD[c] <=> 2,3-Dihydroxybenzoate[c] + NADH[c] + H[c]	(SACE_3855)	SACE_3855		Biosynthesis of siderophore group nonribosomal peptides	1	-1000	1000	0	2	1.3.1.28
r1264	isochorismatase （2,3 dihydro-2,3 dihydroxybenzoate synthase)	Isochorismate[c] + H2O[c] <=> (2S,3S)-23ddhb[c] + Pyruvate[c]	(SACE_3852) or (SACE_5166)	SACE_3852,SACE_5166		Biosynthesis of siderophore group nonribosomal peptides	1	-1000	1000	0	2	3.3.2.1
r1265	SACE_5325peptidase C45, acyl-coenzyme A/6-aminopenicillanic acid acyl-transferase	isopencilN[c] + Acyl-CoA[c] + H2O[c] <=> Penicillin[c] + CoA[c] + L-2-Aminoadipate[c]	(SACE_5325)	SACE_5325		Penicillin and cephalosporin biosynthesis	1	-1000	1000	0	2	2.3.1.164
r1266	SACE_1373beta lactamase	Penicillin[c] + H2O[c] => pencilca[c]	(SACE_1373) or (SACE_1374) or (SACE_3056) or (SACE_3877) or (SACE_4081) or (SACE_4283) or (SACE_5313)	SACE_1373,SACE_1374,SACE_3056,SACE_3877,SACE_4081,SACE_4283,SACE_5313		Penicillin and cephalosporin biosynthesis	0	0	1000	0	2	3.5.2.6
r1267	D-amino acid oxidase	cephac[c] + H2O[c] + O2[c] <=> (7R)-7-(5-Carboxy-5-oxopentanoyl)aminocephalosporinate[c] + NH3[c] + H2O2[c]	(SACE_0979)	SACE_0979		Penicillin and cephalosporin biosynthesis	1	-1000	1000	0	2	1.4.3.3
r1268	SACE_2992putative inost phosphate synthase	i1p[c] => alpha-g6p[c]	(SACE_2992) or (SACE_7359)	SACE_2992,SACE_7359		Streptomycin biosynthesis	0	0	1000	0	2	5.5.1.4
r1269	catechol 1,2-dioxygenase	Catechol[c] + O2[c] <=> ccmuac[c]	(SACE_4382)	SACE_4382		Benzoate degradation via hydroxylation	1	-1000	1000	0	2	1.13.11.1
r1270	SACE_1824acetyl-coa acetyltransferase (thiolase)	CoA[c] + 3-Oxoadipyl-CoA[c] => Succinyl-CoA[c] + Acetyl-CoA[c]	(SACE_1824) or (SACE_3994)	SACE_1824,SACE_3994		Benzoate degradation via hydroxylation	0	0	1000	0	2	2.3.1.16
r1271	4-hydroxybenzoate 3-monooxygenase	4-Hydroxybenzoate[c] + O2[c] + NADPH[c] + H[c] => 3,4-Dihydroxybenzoate[c] + NADP[c] + H2O[c]	(SACE_0822) or (SACE_4035)	SACE_0822,SACE_4035		Benzoate degradation via hydroxylation	0	0	1000	0	2	1.14.13.2
r1272	protocatechuate 3,4-dioxygenase alpha chain	3,4-Dihydroxybenzoate[c] + O2[c] <=> 3-Carboxy-ccmuac[c]	(SACE_3513 and SACE_3514)	SACE_3513,SACE_3514		Benzoate degradation via hydroxylation	1	-1000	1000	0	2	1.13.11.3
r1273	3-oxoadipate enol-lactone hydrolase	2-Oxo-2,3-dihydrofuran-5-acetate[c] + H2O[c] <=> 3-Oxoadipate[c]	(SACE_3511)	SACE_3511		Benzoate degradation via hydroxylation	1	-1000	1000	0	2	3.1.1.24
r1274	3-carboxy-ccmuac cycloisomerase	2-Carboxy-2,5-dihydro-5-oxofuran-2-acetate[c] => 3-Carboxy-ccmuac[c]	(SACE_3512)	SACE_3512		Benzoate degradation via hydroxylation	0	0	1000	0	2	5.5.1.2
r1275	4-carboxymuconolactone decarboxylase	2-Carboxy-2,5-dihydro-5-oxofuran-2-acetate[c] => 2-Oxo-2,3-dihydrofuran-5-acetate[c] + CO2[c]	(SACE_3510)	SACE_3510		Benzoate degradation via hydroxylation	0	0	1000	0	2	4.1.1.44
r1276	SACE_4377oxidoreductase FAD-binding region [SP:tr:A4FHX1_SACEN]	Benzoate[c] + NADH[c] + H[c] + O2[c] <=> 2dhch1c[c] + NAD[c]	(SACE_4377 and SACE_4378 and SACE_4379)	SACE_4377,SACE_4378,SACE_4379		Benzoate degradation via hydroxylation	1	-1000	1000	0	2	1.14.1210
r1277	SACE_4377oxidoreductase FAD-binding region [SP:tr:A4FHX1_SACEN]	Benzoate[c] + NADPH[c] + H[c] + O2[c] <=> 2dhch1c[c] + NADP[c]	(SACE_4377 and SACE_4378 and SACE_4379)	SACE_4377,SACE_4378,SACE_4379		Benzoate degradation via hydroxylation	0	0	0	0	2	1.14.1210
r1278	SACE_4412mandelate racemase/muconate lactonizing enzyme	ccmuac[c] => (S)-5-Oxo-2,5-dihydrofuran-2-acetate[c]	(SACE_4412) or (SACE_6327)	SACE_4412,SACE_6327		Benzoate degradation via hydroxylation	0	0	1000	0	2	5.5.1.1
r1279	muconolactone delta-isomerase （MIase)	(S)-5-Oxo-2,5-dihydrofuran-2-acetate[c] => 2-Oxo-2,3-dihydrofuran-5-acetate[c]	(SACE_4383)	SACE_4383		Benzoate degradation via hydroxylation	0	0	1000	0	2	5.3.3.4
r1280	3-hydroxyacyl-CoA dehydrogenase	3-Hydroxypimeloyl-CoA[c] + NAD[c] <=> 3-Oxopimeloyl-CoA[c] + NADH[c] + H[c]	(SACE_5040) or (SACE_6362)	SACE_5040,SACE_6362		Benzoate degradation via hydroxylation	0	0	1000	0	2	1.1.1.35
r1281	SACE_5883N-acetylglutamate synthase	3-Oxopimeloyl-CoA[c] + CoA[c] <=> Glutaryl-CoA[c] + Acetyl-CoA[c]	(SACE_5883) or (SACE_5884) or (SACE_6204)	SACE_5883,SACE_5884,SACE_6204		Benzoate degradation via hydroxylation	1	-1000	1000	0	2	2.3.1.16
r1282	Succinyl-CoA:3-oxoadipate CoA-transferase	Succinyl-CoA[c] + 3-Oxoadipate[c] <=> Succinate[c] + 3-Oxoadipyl-CoA[c]				Benzoate degradation via hydroxylation	1	-1000	1000	0	2	2.8.3.6	reaction added for gap filling
r1283	(1R,6S)-1,6-dihydroxycyclohexa-2,4-diene-1-carboxylate:NAD oxidoreductase (decarboxylating)	2dhch1c[c] + NAD[c] <=> Catechol[c] + NADH[c] + CO2[c] + H[c]				Benzoate degradation via hydroxylation	1	-1000	1000	0	2	1.3.1.25	reaction added for gap filling
r1284	acylphosphatase	benzp[c] + H2O[c] <=> Benzoate[c] + Orthophosphate[c]	(SACE_6072)	SACE_6072		Benzoate degradation via hydroxylation	1	-1000	1000	0	2	3.6.1.7
r1285	SACE_1914amidase	Benzamide[c] + H2O[c] <=> Benzoate[c] + NH3[c]	(SACE_1914) or (SACE_4293) or (SACE_4294) or (SACE_5032)	SACE_1914,SACE_4293,SACE_4294,SACE_5032		Benzoate degradation via hydroxylation	1	-1000	1000	0	2	3.5.1.4
r1286	benzoylformate decarboxylase	4-Hydroxybenzaldehyde[c] + CO2[c] => 4-Hydroxyphenylglyoxylate[c]	(SACE_0551) or (SACE_3142)	SACE_0551,SACE_3142		Benzoate degradation via hydroxylation	0	0	1000	0	2	4.1.1.7
r1287	glutaryl-CoA dehydrogenase	Glutaryl-CoA[c] + Acceptor[c] <=> Glutaconyl-1-CoA[c] + acceptor(reduced)[c]	(SACE_1911) or (SACE_5409)	SACE_1911,SACE_5409		Benzoate degradation via hydroxylation	1	-1000	1000	0	2	1.3.8.6
r1288	thioesterase	6-Oxo-2-hydroxycyclohexane-1-carboxyl-CoA[c] + H2O[c] <=> 3-Hydroxypimeloyl-CoA[c]	(SACE_4921)	SACE_4921		Benzoate degradation via hydroxylation	1	-1000	1000	0	2	3.7.1.21
r1289	protocatechuate 3,4-dioxygenase alpha chain	Gallate[c] + O2[c] <=> 2-Pyrone-4,6-dicarboxylate[c] + H2O[c]	(SACE_3513 and SACE_3514)	SACE_3513,SACE_3514		Benzoate degradation via hydroxylation	1	-1000	1000	0	2	1.13.11.3
r1290	SACE_3937mandelate racemase/muconate lactonizing enzyme	(S)-4-Hydroxymandelate[c] <=> (R)-4-Hydroxymandelate[c]	(SACE_3937) or (SACE_4598) or (SACE_6327)	SACE_3937,SACE_4598,SACE_6327		Benzoate degradation via hydroxylation	1	-1000	1000	0	2	5.1.2.2 5.5.1.1
r1291	SACE_4412mandelate racemase/muconate lactonizing enzyme	4car2hmcnsad => 2-Hydroxy-2-hydropyrone-4,6-dicarboxylate[c]	(SACE_4412) or (SACE_6327)	SACE_4412,SACE_6327		Benzoate degradation via hydroxylation	0	0	1000	0	2	5.5.1.1 5.1.2.2
r1292	putative 2-hydroxyhepta-2,4-diene-1,7-dioate isomerase	(Z)-5-Oxohex-2-enedioate[c] + H2O[c] <=> 4-Hydroxy-2-oxopentanoate[c] + CO2[c]	(SACE_1233) or (SACE_3828) or (SACE_3938) or (SACE_6202)	SACE_1233,SACE_3828,SACE_3938,SACE_6202		Benzoate degradation via hydroxylation	1	-1000	1000	0	2	4.1.1.- 5.3.3.-
r1293	SACE_26265-carboxymethyl-2-hydroxymuconate delta-isomerase	(E)-4-Oxobut-1-ene-1,2,4-tricarboxylate[c] => 4-Carboxy-2-hydroxyhexa-2,4-dienedioate[c]	(SACE_2626)	SACE_2626		Benzoate degradation via hydroxylation	0	0	1000	0	2	5.3.2.8
r1294	benzoylformate decarboxylase	Benzoylformate[c] <=> Benzaldehyde[c] + CO2[c]	(SACE_0551) or (SACE_3142)	SACE_0551,SACE_3142		Aminobenzoate degradation	1	-1000	1000	0	2	4.1.1.7
r1295	SACE_2821oxidoreductase alpha subunit	Vanillate[c] + O2[c] + NADH[c] + H[c] <=> 3,4-Dihydroxybenzoate[c] + NAD[c] + H2O[c] + Formaldehyde[c]	(SACE_2821)	SACE_2821		Aminobenzoate degradation	1	-1000	1000	0	2	1.14.13.82
r1296	SACE_3937mandelate racemase/muconate lactonizing enzyme	(R)-Mandelate[c] => (S)-Mandelate[c]	(SACE_3937) or (SACE_4598) or (SACE_6327)	SACE_3937,SACE_4598,SACE_6327		Aminobenzoate degradation	0	0	1000	0	2	5.1.2.2 5.5.1.1
r1297	SACE_3052medium-chain acyl-CoA ligase	Cyclopropanecarboxylate[c] + CoA[c] + ATP[c] <=> Cyclopropanecarboxyl-CoA[c] + ADP[c] + Orthophosphate[c]	(SACE_3052) or (SACE_6372) or (SACE_6950)	SACE_3052,SACE_6372,SACE_6950		Aminobenzoate degradation	1	-1000	1000	0	2	6.2.1.-
r1298	SACE_5883N-acetylglutamate synthase	3-Hydroxy-5-oxohexanoyl-CoA[c] + CoA[c] <=> (S)-3-Hydroxybutanoyl-CoA[c] + Acetyl-CoA[c]	(SACE_5883) or (SACE_5884) or (SACE_6204)	SACE_5883,SACE_5884,SACE_6204		Aminobenzoate degradation	1	-1000	1000	0	2	2.3.1.-
r1299	SACE_4377oxidoreductase FAD-binding region [SP:tr:A4FHX1_SACEN]	2-Fluorobenzoate[c] + NADH[c] + H[c] + O2[c] <=> 2-Fluorocyclohexadiene-cis,cis-1,2-diol-1-carboxylate[c] + NAD[c]	(SACE_4377 and SACE_4378 and SACE_4379)	SACE_4377,SACE_4378,SACE_4379		Fluorobenzoate degradation	1	-1000	1000	0	2	E_4377 oxidoreductase FAD-binding region [SP:tr:A4FHX1_SACEN
r1300	SACE_4377oxidoreductase FAD-binding region [SP:tr:A4FHX1_SACEN]	2-Fluorobenzoate[c] + NADH[c] + H[c] + O2[c] <=> 6-Fluorocyclohexadiene-cis,cis-1,2-diol-1-carboxylate[c] + NAD[c]	(SACE_4377 and SACE_4378 and SACE_4379)	SACE_4377,SACE_4378,SACE_4379		Fluorobenzoate degradation	1	-1000	1000	0	2	E_4377 oxidoreductase FAD-binding region [SP:tr:A4FHX1_SACEN
r1301	SACE_4377oxidoreductase FAD-binding region [SP:tr:A4FHX1_SACEN]	3-Fluorobenzoate[c] + NADH[c] + O2[c] + H[c] <=> 3-Fluorocyclohexadiene-cis,cis-1,2-diol-1-carboxylate[c] + NAD[c]	(SACE_4377 and SACE_4378 and SACE_4379)	SACE_4377,SACE_4378,SACE_4379		Fluorobenzoate degradation	1	-1000	1000	0	2	E_4377 oxidoreductase FAD-binding region [SP:tr:A4FHX1_SACEN
r1302	SACE_4377oxidoreductase FAD-binding region [SP:tr:A4FHX1_SACEN]	3-Fluorobenzoate[c] + NADH[c] + H[c] + O2[c] <=> 5-Fluorocyclohexadiene-cis,cis-1,2-diol-1-carboxylate[c] + NAD[c]	(SACE_4377 and SACE_4378 and SACE_4379)	SACE_4377,SACE_4378,SACE_4379		Fluorobenzoate degradation	1	-1000	1000	0	2	E_4377 oxidoreductase FAD-binding region [SP:tr:A4FHX1_SACEN
r1303	SACE_4377oxidoreductase FAD-binding region [SP:tr:A4FHX1_SACEN]	4-Fluorobenzoate[c] + NADH[c] + H[c] + O2[c] <=> 4-Fluorocyclohexadiene-cis,cis-1,2-diol-1-carboxylate[c] + NAD[c]	(SACE_4377 and SACE_4378 and SACE_4379)	SACE_4377,SACE_4378,SACE_4379		Fluorobenzoate degradation	1	-1000	1000	0	2	E_4377 oxidoreductase FAD-binding region [SP:tr:A4FHX1_SACEN
r1304	catechol 1,2-dioxygenase	3-Fluorocatechol[c] + O2[c] <=> 2-Fluoro-ccmuac[c]	(SACE_4382)	SACE_4382		Fluorobenzoate degradation	1	-1000	1000	0	2	1.13.11.1
r1305	catechol 1,2-dioxygenase	4-Fluorocatechol[c] + O2[c] <=> 3-Fluoro-ccmuac[c]	(SACE_4382)	SACE_4382		Fluorobenzoate degradation	1	-1000	1000	0	2	1.13.11.1
r1306	SACE_4412mandelate racemase/muconate lactonizing enzyme	3-Fluoro-ccmuac[c] <=> 4-Fluoromuconolactone[c]	(SACE_4412) or (SACE_6327)	SACE_4412,SACE_6327		Fluorobenzoate degradation	1	-1000	1000	0	2	5.5.1.1
r1307	SACE_0218carboxymethylenebutenolidase	5-Fluoromuconolactone[c] + H2O[c] <=> 2-Maleylacetate[c] + hydrofa[c]	(SACE_0218) or (SACE_4437) or (SACE_4781) or (SACE_5348)	SACE_0218,SACE_4437,SACE_4781,SACE_5348		Fluorobenzoate degradation	1	-1000	1000	0	2	3.1.1.45
r1308	SACE_0218carboxymethylenebutenolidase	4-Fluoromuconolactone[c] + H2O[c] <=> 2-Maleylacetate[c] + hydrofa[c]	(SACE_0218) or (SACE_4437) or (SACE_4781) or (SACE_5348)	SACE_0218,SACE_4437,SACE_4781,SACE_5348		Fluorobenzoate degradation	1	-1000	1000	0	2	3.1.1.45
r1309	SACE_1535putative zinc-type alcohol dehydrogenase transmembrane protein	trans-3-Chloro-2-propene-1-ol[c] <=> 3cholphyald[c] + 2 H[c]	(SACE_1535) or (SACE_2374) or (SACE_2733) or (SACE_2738) or (SACE_2944) or (SACE_2945) or (SACE_3519) or (SACE_4085) or (SACE_4163) or (SACE_4519) or (SACE_4852) or (SACE_6396)	SACE_1535,SACE_2374,SACE_2733,SACE_2738,SACE_2944,SACE_2945,SACE_3519,SACE_4085,SACE_4163,SACE_4519,SACE_4852,SACE_6396		3-Chloroacrylic acid degradation	1	-1000	1000	0	2	1.1.1.1
r1310	SACE_1535putative zinc-type alcohol dehydrogenase transmembrane protein	cis-3-Chloro-2-propene-1-ol[c] <=> cis-3cholphyald[c] + 2 H[c]	(SACE_1535) or (SACE_2374) or (SACE_2733) or (SACE_2738) or (SACE_2944) or (SACE_2945) or (SACE_3519) or (SACE_4085) or (SACE_4163) or (SACE_4519) or (SACE_4852) or (SACE_6396)	SACE_1535,SACE_2374,SACE_2733,SACE_2738,SACE_2944,SACE_2945,SACE_3519,SACE_4085,SACE_4163,SACE_4519,SACE_4852,SACE_6396		3-Chloroacrylic acid degradation	1	-1000	1000	0	2	1.1.1.1
r1311	SACE_0343aldehyde dehydrogenase （NAD)	3cholphyald[c] + H2O[c] <=> trans3chloro[c] + 2 H[c]	(SACE_0343) or (SACE_1341) or (SACE_2377) or (SACE_2783) or (SACE_2915) or (SACE_3880) or (SACE_6014) or (SACE_6249) or (SACE_6565) or (SACE_6566)	SACE_0343,SACE_1341,SACE_2377,SACE_2783,SACE_2915,SACE_3880,SACE_6014,SACE_6249,SACE_6565,SACE_6566		3-Chloroacrylic acid degradation	1	-1000	1000	0	2	1.2.1.3
r1312	SACE_0343aldehyde dehydrogenase （NAD)	cis-3cholphyald[c] + H2O[c] <=> cis3chloro[c] + 2 H[c]	(SACE_0343) or (SACE_1341) or (SACE_2377) or (SACE_2783) or (SACE_2915) or (SACE_3880) or (SACE_6014) or (SACE_6249) or (SACE_6565) or (SACE_6566)	SACE_0343,SACE_1341,SACE_2377,SACE_2783,SACE_2915,SACE_3880,SACE_6014,SACE_6249,SACE_6565,SACE_6566		3-Chloroacrylic acid degradation	1	-1000	1000	0	2	1.2.1.3
r1313	SACE_3906haloalkane dehalogenase	trans-1,3-Dichloropropene[c] + H2O[c] <=> trans-3-Chloro-2-propene-1-ol[c] + HCl[c]	(SACE_3906) or (SACE_5821)	SACE_3906,SACE_5821		3-Chloroacrylic acid degradation	1	-1000	1000	0	2	3.8.1.5
r1314	SACE_3906haloalkane dehalogenase	cis-1,3-Dichloropropene[c] + H2O[c] <=> cis-3-Chloro-2-propene-1-ol[c] + HCl[c]	(SACE_3906) or (SACE_5821)	SACE_3906,SACE_5821		3-Chloroacrylic acid degradation	1	-1000	1000	0	2	3.8.1.5
r1315	putative 2-hydroxyhepta-2,4-diene-1,7-dioate isomerase	3-Oxopropanoate[c] <=> Acetaldehyde[c] + CO2[c]	(SACE_1233) or (SACE_3828) or (SACE_3938) or (SACE_6202)	SACE_1233,SACE_3828,SACE_3938,SACE_6202		3-Chloroacrylic acid degradation	0	0	0	0	2	4.1.1.- 5.3.3.-
r1316	SACE_3906haloalkane dehalogenase	1,2-Dichloroethane[c] + H2O[c] <=> 2-Chloroethanol[c] + HCl[c]	(SACE_3906) or (SACE_5821)	SACE_3906,SACE_5821		1,2-Dichloroethane degradation	1	-1000	1000	0	2	3.8.1.5
r1317	quinoprotein ethanol dehydrogenase precursor	2-Chloroethanol[c] + PQQ[c] <=> Chloroacetaldehyde[c] + PQQH2[c]	(SACE_4449)	SACE_4449		1,2-Dichloroethane degradation	1	-1000	1000	0	2	1.1.2.8
r1318	SACE_0343aldehyde dehydrogenase （NAD)	Chloroacetaldehyde[c] + NAD[c] + H2O[c] <=> Chloroacetic-acid[c] + NADH[c] + H[c]	(SACE_0343) or (SACE_1341) or (SACE_2377) or (SACE_2783) or (SACE_2915) or (SACE_3880) or (SACE_6014) or (SACE_6249) or (SACE_6565) or (SACE_6566)	SACE_0343,SACE_1341,SACE_2377,SACE_2783,SACE_2915,SACE_3880,SACE_6014,SACE_6249,SACE_6565,SACE_6566		1,2-Dichloroethane degradation	1	-1000	1000	0	2	1.2.1.3
r1319	SACE_2847epoxide alpha/beta hydrolase	Chloroacetic-acid[c] + H2O[c] <=> Glycolate[c] + HCl[c]	(SACE_2847) or (SACE_2965) or (SACE_4364) or (SACE_4734)	SACE_2847,SACE_2965,SACE_4364,SACE_4734		1,2-Dichloroethane degradation	1	-1000	1000	0	2	3.8.1.3 3.8.1.2
r1320	SACE_3057pentachlorophenol monooxygenase	3,5-Dibromo-4-hydroxybenzonitrile[c] + 2 NADPH[c] + 2 H[c] + O2[c] <=> 2,6-Dibromohydroquinone[c] + 2 NADP[c] + cyan[c] + H2O[c]	(SACE_3057) or (SACE_3947) or (SACE_4082)	SACE_3057,SACE_3947,SACE_4082		1,4-Dichlorobenzene degradation	1	-1000	1000	0	2	1.14.13.50
r1321	SACE_0218carboxymethylenebutenolidase	cis-4-Carboxymethylenebut-2-en-4-olide[c] + H2O[c] <=> 2-Maleylacetate[c]	(SACE_0218) or (SACE_4437) or (SACE_4781) or (SACE_5348)	SACE_0218,SACE_4437,SACE_4781,SACE_5348		1,4-Dichlorobenzene degradation	1	-1000	1000	0	2	3.1.1.45
r1322	SACE_3057pentachlorophenol monooxygenase	Pentachlorophenol[c] + O2[c] + 2 NADPH[c] + H[c] <=> Tetrachlorohydroquinone[c] + Cl[c] + 2 NADP[c] + H2O[c]	(SACE_3057) or (SACE_3947) or (SACE_4082)	SACE_3057,SACE_3947,SACE_4082		1,4-Dichlorobenzene degradation	1	-1000	1000	0	2	1.14.13.50
r1323	catechol 1,2-dioxygenase	4-Chlorocatechol[c] + O2[c] <=> 3-Chloro-ccmuac[c]	(SACE_4382)	SACE_4382		1,4-Dichlorobenzene degradation	1	-1000	1000	0	2	1.13.11.1
r1324	SACE_4412mandelate racemase/muconate lactonizing enzyme	3-Chloro-ccmuac[c] <=> Protoanemonin[c] + HCl[c] + CO2[c]	(SACE_4412) or (SACE_6327)	SACE_4412,SACE_6327		1,4-Dichlorobenzene degradation	1	-1000	1000	0	2	5.5.1.1
r1325	SACE_0218carboxymethylenebutenolidase	Protoanemonin[c] + H2O[c] <=> cis-Acetylacrylate[c]	(SACE_0218) or (SACE_4437) or (SACE_4781) or (SACE_5348)	SACE_0218,SACE_4437,SACE_4781,SACE_5348		1,4-Dichlorobenzene degradation	1	-1000	1000	0	2	3.1.1.45
r1326	SACE_0218carboxymethylenebutenolidase	cis-2-Chloro-4-carboxymethylenebut-2-en-1,4-olide[c] + H2O[c] <=> 2-Chloromaleylacetate[c]	(SACE_0218) or (SACE_4437) or (SACE_4781) or (SACE_5348)	SACE_0218,SACE_4437,SACE_4781,SACE_5348		1,4-Dichlorobenzene degradation	1	-1000	1000	0	2	3.1.1.45
r1327	SACE_1671PheA/TfdB family FAD-binding monooxygenase	2,6-Dichlorophenol[c] + O2[c] + NADH[c] + H[c] <=> 2,6-Dichlorohydroquinone[c] + NAD[c] + H2O[c]	(SACE_1671) or (SACE_3584) or (SACE_6561)	SACE_1671,SACE_3584,SACE_6561		1,4-Dichlorobenzene degradation	1	-1000	1000	0	2	1.14.13.-
r1328	SACE_1671PheA/TfdB family FAD-binding monooxygenase	2,4,6-Trichlorophenol[c] + 2 NADH[c] + O2[c] <=> 2,6-Dichlorohydroquinone[c] + 2 NAD[c] + HO[c] + Cl[c]	(SACE_1671) or (SACE_3584) or (SACE_6561)	SACE_1671,SACE_3584,SACE_6561		1,4-Dichlorobenzene degradation	1	-1000	1000	0	2	1.14.13.-
r1329	SACE_3556phthalate 4,5-dioxygenase	Phthalate[c] + O2[c] + NADH[c] + H[c] <=> cis-4,5-Dihydroxycyclohexa-1(6),2-diene-1,2-dicarboxylate[c] + NAD[c]	(SACE_3556)	SACE_3556		2,4-Dichlorobenzoate degradation	1	-1000	1000	0	2	1.14.12.7
r1330	SACE_2855putative heroin esterase, chain A	4-Sulfolactone[c] + HO[c] <=> HSO3[c] + 2-Maleylacetate[c]	(SACE_2855) or (SACE_4169)	SACE_2855,SACE_4169		2,4-Dichlorobenzoate degradation	1	-1000	1000	0	2	3.1.1.-
r1331	SACE_0218carboxymethylenebutenolidase	trans-4-Carboxymethylenebut-2-en-4-olide[c] + H2O[c] <=> 2-Maleylacetate[c]	(SACE_0218) or (SACE_4437) or (SACE_4781) or (SACE_5348)	SACE_0218,SACE_4437,SACE_4781,SACE_5348		gamma-Hexachlorocyclohexane degradation	1	-1000	1000	0	2	3.1.1.45
r1332	SACE_0218carboxymethylenebutenolidase	2,5-Dichloro-carboxymethylenebut-2-en-4-olide[c] + H2O[c] <=> 2,5-Dichloro-4-oxohex-2-enedioate[c]	(SACE_0218) or (SACE_4437) or (SACE_4781) or (SACE_5348)	SACE_0218,SACE_4437,SACE_4781,SACE_5348		gamma-Hexachlorocyclohexane degradation	1	-1000	1000	0	2	3.1.1.45
r1333	SACE_1671PheA/TfdB family FAD-binding monooxygenase	4-Nitrophenol[c] + O2[c] + NADPH[c] + H[c] => p-Benzoquinone[c] + Nitrite[c] + NADP[c] + H2O[c]	(SACE_1671) or (SACE_3584) or (SACE_6561)	SACE_1671,SACE_3584,SACE_6561		gamma-Hexachlorocyclohexane degradation	0	0	1000	0	2	1.14.13.-
r1334	putative cytochrome P450	Parathion[c] + cytP450r[c] + O2[c] <=> Paraoxon[c] + cytP450o[c] + Sulfur[c] + H2O[c]	(SACE_0125) or (SACE_2802) or (SACE_4144) or (SACE_4205) or (SACE_5309)	SACE_0125,SACE_2802,SACE_4144,SACE_4205,SACE_5309		gamma-Hexachlorocyclohexane degradation	1	-1000	1000	0	2	1.14.14.1
r1335	cytochrome P450-like enzyme	4-Nitrocatechol[c] + O2[c] + 3 H[c] <=> Benzene-1,2,4-triol[c] + Nitrite[c] + H2O[c]	(SACE_0229) or (SACE_0651) or (SACE_0730) or (SACE_1158) or (SACE_1426) or (SACE_2622) or (SACE_2631) or (SACE_3308) or (SACE_4142) or (SACE_4562) or (SACE_4818) or (SACE_5814) or (SACE_5939) or (SACE_6112)	SACE_0229,SACE_0651,SACE_0730,SACE_1158,SACE_1426,SACE_2622,SACE_2631,SACE_3308,SACE_4142,SACE_4562,SACE_4818,SACE_5814,SACE_5939,SACE_6112		gamma-Hexachlorocyclohexane degradation	1	-1000	1000	0	2	1.14.-.-
r1336	SACE_3906haloalkane dehalogenase	1,3,4,6-Tetrachloro-1,4-cyclohexadiene[c] + H2O[c] <=> 2,4,5-Trichloro-2,5-cyclohexadiene-1-ol[c] + HCl[c]	(SACE_3906) or (SACE_5821)	SACE_3906,SACE_5821		gamma-Hexachlorocyclohexane degradation	1	-1000	1000	0	2	3.8.1.5
r1337	SACE_3906haloalkane dehalogenase	2,4,5-Trichloro-2,5-cyclohexadiene-1-ol[c] + H2O[c] <=> 2,5-Dichloro-2,5-cyclohexadiene-1,4-diol[c] + HCl[c]	(SACE_3906) or (SACE_5821)	SACE_3906,SACE_5821		gamma-Hexachlorocyclohexane degradation	1	-1000	1000	0	2	3.8.1.5
r1338	catechol 1,2-dioxygenase	3,4,6-Trichlorocatechol[c] + O2[c] <=> 2,3,5-Trichloro-ccmuac[c]	(SACE_4382)	SACE_4382		gamma-Hexachlorocyclohexane degradation	1	-1000	1000	0	2	1.13.11.1
r1339	catechol 1,2-dioxygenase	3-Chlorocatechol[c] + O2[c] <=> 2-Chloro-ccmuac[c]	(SACE_4382)	SACE_4382		gamma-Hexachlorocyclohexane degradation	1	-1000	1000	0	2	1.13.11.1
r1340	SACE_1671PheA/TfdB family FAD-binding monooxygenase	p-Benzenediol[c] + NADPH[c] + H[c] + O2[c] <=> Benzene-1,2,4-triol[c] + NADP[c] + H2O[c]	(SACE_1671) or (SACE_3584) or (SACE_6561)	SACE_1671,SACE_3584,SACE_6561		gamma-Hexachlorocyclohexane degradation	1	-1000	1000	0	2	1.14.13.-
r1341	benzaldehyde dehydrogenase （NAD)	3-Hydroxybenzaldehyde[c] + NAD[c] + H2O[c] <=> 3-Hydroxybenzoate[c] + NADH[c] + H[c]	(SACE_3144)	SACE_3144		Toluene and xylene degradation	1	-1000	1000	0	2	1.2.1.28
r1342	benzaldehyde dehydrogenase (NAD)	4-Hydroxybenzaldehyde[c] + NAD[c] + H2O[c] => 4-Hydroxybenzoate[c] + NADH[c] + H[c]	(SACE_3144)	SACE_3144		Toluene and xylene degradation	0	0	1000	0	2	1.2.1.28
r1343	benzaldehyde dehydrogenase (NAD)	Benzaldehyde[c] + NAD[c] + H2O[c] <=> Benzoate[c] + NADH[c] + H[c]	(SACE_3144)	SACE_3144		Toluene and xylene degradation	1	-1000	1000	0	2	1.2.1.28
r1344	benzaldehyde dehydrogenase （NAD)	p-Tolualdehyde[c] + NADP[c] + H2O[c] <=> Toluate[c] + NADPH[c] + H[c]	(SACE_3144)	SACE_3144		Toluene and xylene degradation	1	-1000	1000	0	2	1.2.1.28
r1345	catechol 1,2-dioxygenase	4-Methylcatechol[c] + O2[c] => 3-Methyl-cis,cis-hexadienedioate[c]	(SACE_4382)	SACE_4382		Toluene and xylene degradation	0	0	1000	0	2	1.13.11.1
r1346	SACE_4412mandelate racemase/muconate lactonizing enzyme	3-Methyl-cis,cis-hexadienedioate[c] => 4-Carboxymethyl-4-methylbut-2-en-1,4-olide[c]	(SACE_4412) or (SACE_6327)	SACE_4412,SACE_6327		Toluene and xylene degradation	0	0	1000	0	2	5.5.1.1
r1347	benzaldehyde dehydrogenase （NAD)	2-Methylbenzaldehyde[c] + NADP[c] + H2O[c] <=> o-Toluate[c] + NADPH[c] + H[c]	(SACE_3144)	SACE_3144		Toluene and xylene degradation	1	-1000	1000	0	2	1.2.1.28
r1348	benzaldehyde dehydrogenase （NAD)	3-Methylbenzaldehyde[c] + NADP[c] + H2O[c] => m-Methylbenzoate[c] + NADPH[c] + H[c]	(SACE_3144)	SACE_3144		Toluene and xylene degradation	0	0	1000	0	2	1.2.1.28
r1349	SACE_1671PheA/TfdB family FAD-binding monooxygenase	2 Toluene-4-sulfonate[c] + O2[c] + 2 H[c] <=> 2 4-Cresol[c] + 2 HSO3[c]	(SACE_1671) or (SACE_3584) or (SACE_6561)	SACE_1671,SACE_3584,SACE_6561		Toluene and xylene degradation	1	-1000	1000	0	2	1.14.13.-
r1350	SACE_1671PheA/TfdB family FAD-binding monooxygenase	3-Cresol[c] + O2[c] + NADH[c] + H[c] <=> 3hydroalc[c] + NAD[c] + H2O[c]	(SACE_1671) or (SACE_3584) or (SACE_6561)	SACE_1671,SACE_3584,SACE_6561		Toluene and xylene degradation	1	-1000	1000	0	2	1.14.13.-
r1351	SACE_0536carbon monoxide dehydrogenase small chain	2,4-Diamino-6-nitrotoluene[c] <=> 2,4-Diamino-6-hydroxylaminotoluene[c]	(SACE_0536 and SACE_0537 and SACE_0538 and SACE_1160 and SACE_1161 and SACE_1162 and SACE_3061 and SACE_3062 and SACE_4017 and SACE_4018 and SACE_4019 and SACE_4020 and SACE_4873 and SACE_4874 and SACE_5140)	SACE_0536,SACE_0537,SACE_0538,SACE_1160,SACE_1161,SACE_1162,SACE_3061,SACE_3062,SACE_4017,SACE_4018,SACE_4019,SACE_4020,SACE_4873,SACE_4874,SACE_5140		Trinitrotoluene degradation	1	-1000	1000	0	2	1.2.99.2 1.12.99.6
r1352	SACE_0058putative acetyltransferase	2,4-Diamino-6-nitrotoluene[c] + Acetyl-CoA[c] <=> 4-Acetamido-2-amino-6-nitrotoluene[c] + CoA[c]	(SACE_0058)	SACE_0058		Trinitrotoluene degradation	1	-1000	1000	0	2	2.3.1.5
r1353	SACE_1914amidase	Acrylamide[c] + H2O[c] => Propenoate[c] + NH3[c]	(SACE_1914) or (SACE_4293) or (SACE_4294) or (SACE_5032)	SACE_1914,SACE_4293,SACE_4294,SACE_5032		Styrene degradation	0	0	1000	0	2	3.5.1.4
r1354	3-oxoadipate:succinyl-CoA transferase, B subunit	Acetyl-CoA[c] + Propenoate[c] <=> Acetate[c] + Propenoyl-CoA[c]	(SACE_3515 and SACE_3516 and SACE_4007 and SACE_4008 and SACE_4876 and SACE_4877)	SACE_3515,SACE_3516,SACE_4007,SACE_4008,SACE_4876,SACE_4877		Styrene degradation	1	-1000	1000	0	2	2.8.3.12
r1355	SACE_2596flavin-containing monooxygenase FMO	Cyclohexanone[c] + O2[c] + NADPH[c] + H[c] => 6-Hexanolide[c] + NADP[c] + H2O[c]	(SACE_2596)	SACE_2596		Caprolactam degradation	0	0	1000	0	2	1.14.13.22
r1356	SACE_3449gluconolactonase precursor	6-Hexanolide[c] + H2O[c] <=> 6hydro[c]	(SACE_3449) or (SACE_3789)	SACE_3449,SACE_3789		Caprolactam degradation	1	-1000	1000	0	2	3.1.1.17
r1357	NADP-dependent alcohol dehydrogenase	6hydro[c] + NADP[c] <=> adisa[c] + NADPH[c] + H[c]	(SACE_1843) or (SACE_2652)	SACE_1843,SACE_2652		Caprolactam degradation	1	-1000	1000	0	2	1.1.1.2
r1358	NADP-dependent aldehyde dehydrogenase	adisa[c] + NADP[c] + H2O[c] => Adipate[c] + NADPH[c] + H[c]	(SACE_1997) or (SACE_2783)	SACE_1997,SACE_2783		Caprolactam degradation	0	0	1000	0	2	1.2.1.4
r1359	SACE_3052medium-chain acyl-CoA ligase	Adipate[c] + CoA[c] + ATP[c] <=> Adipyl-CoA[c] + AMP[c] + Diphosphate[c]	(SACE_3052) or (SACE_6372) or (SACE_6950)	SACE_3052,SACE_6372,SACE_6950		Caprolactam degradation	1	-1000	1000	0	2	6.2.1.-
r1360	SACE_2596flavin-containing monooxygenase FMO	NADPH[c] + 2-Hydroxycyclohexan-1-one[c] + H[c] + O2[c] <=> NADP[c] + 1-Oxa-2-oxo-3-hydroxycycloheptane[c] + H2O[c]	(SACE_2596)	SACE_2596		Caprolactam degradation	1	-1000	1000	0	2	1.14.13.22
r1361	adipyl-CoA dehydrogenase	Adipyl-CoA [c]+ FAD[c] => 5-Carboxy-2-pentenoyl-CoA[c] + FADH2[c]				Caprolactam degradation	0	0	1000	0	2	1.3.99.-
r1362	SACE_4441steroid delta-isomerase	11beta,17alpha,21-Trihydroxypregnenolone[c] + NAD[c] => Cortisol[c] + H[c] + NADH[c]	(SACE_4441)	SACE_4441		C21-Steroid hormone metabolism	0	0	1000	0	2	5.3.3.1
r1363	SACE_4441steroid delta-isomerase	11beta,17alpha,21-Trihydroxypregnenolone[c] + NADP[c] => Cortisol[c] + H[c] + NADPH[c]	(SACE_4441)	SACE_4441		C21-Steroid hormone metabolism	0	0	1000	0	2	5.3.3.1
r1364	SACE_4441steroid delta-isomerase	Pregnenolone[c] + NAD[c] => Progesterone[c] + NADH[c] + H[c]	(SACE_4441)	SACE_4441		C21-Steroid hormone metabolism	0	0	1000	0	2	5.3.3.1
r1365	SACE_4441steroid delta-isomerase	Pregnenolone[c] + NADP[c] => Progesterone[c] + NADPH[c] + H[c]	(SACE_4441)	SACE_4441		C21-Steroid hormone metabolism	0	0	1000	0	2	5.3.3.1
r1366	SACE_4441steroid delta-isomerase	17alpha-Hydroxypregnenolone[c] + NAD[c] => 17alpha-Hydroxyprogesterone[c] + NADH[c] + H[c]	(SACE_4441)	SACE_4441		C21-Steroid hormone metabolism	0	0	1000	0	2	5.3.3.1
r1367	SACE_4441steroid delta-isomerase	17alpha-Hydroxyprogesterone[c] + NADPH[c] + H[c] => 17alpha-Hydroxypregnenolone[c] + NADP[c]	(SACE_4441)	SACE_4441		C21-Steroid hormone metabolism	0	0	1000	0	2	5.3.3.1
r1368	SACE_4441steroid delta-isomerase	21-Hydroxypregnenolone[c] + NAD[c] <=> 11-Deoxycorticosterone[c] + NADH[c] + H[c]	(SACE_4441)	SACE_4441		C21-Steroid hormone metabolism	1	-1000	1000	0	2	5.3.3.1
r1369	SACE_4441steroid delta-isomerase	21-Hydroxypregnenolone[c] + NADP[c] <=> 11-Deoxycorticosterone[c] + NADPH[c] + H[c]	(SACE_4441)	SACE_4441		C21-Steroid hormone metabolism	0	0	0	0	2	5.3.3.1
r1370	SACE_4705short-chain dehydrogenase/reductase SDR	Urocortisone[c] + NADH[c] + H[c] => Cortolone[c] + NAD[c]	(SACE_4705)	SACE_4705		C21-Steroid hormone metabolism	0	0	1000	0	2	1.1.1.53
r1371	SACE_4705short-chain dehydrogenase/reductase SDR	Urocortisol[c] + NADH[c] + H[c] => Cortol[c] + NAD[c]	(SACE_4705)	SACE_4705		C21-Steroid hormone metabolism	0	0	1000	0	2	1.1.1.53
r1372	SACE_4705short-chain dehydrogenase/reductase SDR	3alpha,21-Dihydroxy-5beta-pregnane-11,20-dione[c] + NADH[c] + H[c] => 3alpha,20alpha,21-Trihydroxy-5beta-pregnane-11-one[c] + NAD[c]	(SACE_4705)	SACE_4705		C21-Steroid hormone metabolism	0	0	1000	0	2	1.1.1.53
r1373	SACE_4705short-chain dehydrogenase/reductase SDR	3alpha-Hydroxy-5beta-pregnane-20-one[c] + NADH[c] + H[c] => Pregnanediol[c] + NAD[c]	(SACE_4705)	SACE_4705		C21-Steroid hormone metabolism	0	0	1000	0	2	1.1.1.53
r1374	SACE_4441steroid delta-isomerase	17alpha,21-Dihydroxypregnenolone[c] + NAD[c] => 11-Deoxycortisol[c] + H[c] + NADH[c]	(SACE_4441)	SACE_4441		C21-Steroid hormone metabolism	0	0	1000	0	2	5.3.3.1
r1375	SACE_4441steroid delta-isomerase	17alpha,21-Dihydroxypregnenolone[c] + NADP[c] => 11-Deoxycortisol[c] + H[c] + NADPH[c]	(SACE_4441)	SACE_4441		C21-Steroid hormone metabolism	0	0	1000	0	2	5.3.3.1
r1376	tyrosyl-tRNA synthetase	ATP[c] + L-Tyrosine[c] + tRNA(Tyr)[c] <=> AMP[c] + Diphosphate[c] + L-Tyrosyl-tRNA(Tyr)[c]	(SACE_5254)	SACE_5254		Aminoacyl-tRNA biosynthesis	1	-1000	1000	0	2	6.1.1.1
r1377	alanyl-tRNA synthetase	ATP[c] + L-Alanine[c] + tRNA(Ala)[c] => AMP[c] + Diphosphate[c] + L-Alanyl-tRNA[c]	(SACE_2052)	SACE_2052		Aminoacyl-tRNA biosynthesis	0	0	1000	0	2	6.1.1.7
r1378	arginyl-tRNA synthetase	ATP[c] + L-Arginine[c] + tRNA(Arg)[c] => AMP[c] + Diphosphate[c] + L-Arginyl-tRNA(Arg)[c]	(SACE_6300)	SACE_6300		Aminoacyl-tRNA biosynthesis	0	0	1000	0	2	6.1.1.19
r1379	cysteinyl-tRNA synthetase	ATP[c] + L-Cysteine[c] + tRNA(Cys)[c] <=> AMP[c] + Diphosphate[c] + L-Cysteinyl-tRNA(Cys)[c]	(SACE_0443) or (SACE_2226) or (SACE_2667)	SACE_0443,SACE_2226,SACE_2667		Aminoacyl-tRNA biosynthesis	1	-1000	1000	0	2	6.1.1.16
r1380	glycyl-tRNA synthetase	ATP[c] + Glycine[c] + tRNA(Gly)[c] <=> AMP[c] + Diphosphate[c] + Glycyl-tRNA(Gly)[c]	(SACE_1500)	SACE_1500		Aminoacyl-tRNA biosynthesis	1	-1000	1000	0	2	6.1.1.14
r1381	histidyl-tRNA synthetase	ATP[c] + L-Histidine[c] + tRNA(His)[c] <=> AMP[c] + Diphosphate[c] + L-Histidyl-tRNA(His)[c]	(SACE_2032)	SACE_2032		Aminoacyl-tRNA biosynthesis	1	-1000	1000	0	2	6.1.1.21
r1382	isoleucyl-tRNA synthetase	ATP[c] + L-Isoleucine[c] + tRNA(Ile)[c] <=> AMP[c] + Diphosphate[c] + L-Isoleucyl-tRNA(Ile)[c]	(SACE_5828)	SACE_5828		Aminoacyl-tRNA biosynthesis	1	-1000	1000	0	2	6.1.1.5
r1383	leucyl-tRNA synthetase	ATP[c] + L-Leucine[c] + tRNA(Leu)[c] <=> AMP[c] + Diphosphate[c] + L-Leucyl-tRNA(Leu)[c]	(SACE_7373)	SACE_7373		Aminoacyl-tRNA biosynthesis	1	-1000	1000	0	2	6.1.1.4
r1384	lysyl-tRNA synthetase class II	ATP[c] + L-Lysine[c] + tRNA(Lys)[c] <=> AMP[c] + Diphosphate[c] + L-Lysyl-tRNA(Lys)[c]	(SACE_0409) or (SACE_4738)	SACE_0409,SACE_4738		Aminoacyl-tRNA biosynthesis	1	-1000	1000	0	2	6.1.1.6
r1385	methionyl-tRNA synthetase	ATP[c] + L-Methionine[c] + tRNA(Met)[c] <=> AMP[c] + Diphosphate[c] + L-Methionyl-tRNA(Met)[c]	(SACE_0799)	SACE_0799		Aminoacyl-tRNA biosynthesis	1	-1000	1000	0	2	6.1.1.10
r1386	putative phenylalanyl-tRNA synthetase beta subunit	ATP[c] + L-Phenylalanine[c] + tRNA(Phe)[c] <=> AMP[c] + Diphosphate[c] + L-Phenylalanyl-tRNA(Phe)[c]	(SACE_5276 and SACE_5277)	SACE_5276,SACE_5277		Aminoacyl-tRNA biosynthesis	1	-1000	1000	0	2	6.1.1.20
r1387	prolyl-tRNA synthetase	ATP[c] + L-Proline[c] + tRNA(Pro)[c] <=> AMP[c] + Diphosphate[c] + L-Prolyl-tRNA(Pro)[c]	(SACE_5936)	SACE_5936		Aminoacyl-tRNA biosynthesis	1	-1000	1000	0	2	6.1.1.15
r1388	seryl-tRNA synthetase	ATP[c] + L-Serine[c] + tRNA(Ser)[c] <=> AMP[c] + Diphosphate[c] + L-Seryl-tRNA(Ser)[c]	(SACE_0158)	SACE_0158		Aminoacyl-tRNA biosynthesis	1	-1000	1000	0	2	6.1.1.11
r1389	threonyl-tRNA synthetase	ATP[c] + L-Threonine[c] + tRNA(Thr)[c] <=> AMP[c] + Diphosphate[c] + L-Threonyl-tRNA(Thr)[c]	(SACE_2004) or (SACE_3644)	SACE_2004,SACE_3644		Aminoacyl-tRNA biosynthesis	1	-1000	1000	0	2	6.1.1.3
r1390	tryptophanyl tRNA synthetase	ATP[c] + L-Tryptophan[c] + tRNA(Trp)[c] <=> AMP[c] + Diphosphate[c] + L-Tryptophanyl-tRNA(Trp)[c]	(SACE_1002) or (SACE_6592)	SACE_1002,SACE_6592		Aminoacyl-tRNA biosynthesis	1	-1000	1000	0	2	6.1.1.2
r1391	valyl-tRNA synthetase	ATP[c] + L-Valine[c] + tRNA(Val)[c] <=> AMP[c] + Diphosphate[c] + L-Valyl-tRNA(Val)[c]	(SACE_1384)	SACE_1384		Aminoacyl-tRNA biosynthesis	1	-1000	1000	0	2	6.1.1.9
r1392	amidase	L-Glutamyl-tRNA(Gln)[c] + L-Glutamine[c] + ATP[c] + H2O[c] => Glutaminyl-tRNA(Gln)[c] + L-Glutamate[c] + Orthophosphate[c] + ADP[c]	(SACE_3403 and SACE_3773 and SACE_4023 and SACE_6171 and SACE_6173 and SACE_6174)	SACE_3403,SACE_3773,SACE_4023,SACE_6171,SACE_6173,SACE_6174		Aminoacyl-tRNA biosynthesis	0	0	1000	0	2	6.3.5.6 6.3.5.7
r1393	amidase	L-Aspartyl-tRNA(Asn)[c] + L-Glutamine[c] + ATP[c] + H2O[c] => L-Asparaginyl-tRNA(Asn)[c] + L-Glutamate[c] + Orthophosphate[c] + ADP[c]	(SACE_3403 and SACE_3773 and SACE_4023 and SACE_6171 and SACE_6173 and SACE_6174)	SACE_3403,SACE_3773,SACE_4023,SACE_6171,SACE_6173,SACE_6174		Aminoacyl-tRNA biosynthesis	0	0	1000	0	2	6.3.5.6 6.3.5.7
r1394	aspartyl-tRNA synthetase	tRNA(Asp)[c] + L-Aspartate[c] + ATP[c] <=> L-Aspartyl-tRNA(Asp)[c] + Diphosphate[c] + AMP[c]	(SACE_2041)	SACE_2041		Aminoacyl-tRNA biosynthesis	1	-1000	1000	0	2	6.1.1.12
r1395	seryl-tRNA synthetase	ATP[c] + L-Serine[c] + tRNA(Sec)[c] <=> AMP[c] + Diphosphate[c] + L-Seryl-tRNA(Sec)[c]	(SACE_0158)	SACE_0158		Aminoacyl-tRNA biosynthesis	1	-1000	1000	0	2	6.1.1.11
r1396	L-Asparagine:tRNA（Asn) ligase	ATP[c] + L-Asparagine[c] + tRNA(Asn)[c] <=> AMP[c] + Diphosphate[c] + L-Asparaginyl-tRNA(Asn)[c]				Aminoacyl-tRNA biosynthesis	1	-1000	1000	0	2	6.1.1.22	reaction added for synthesis of tRNA(asn)
r1397	L-Glutamine:tRNA（Gln) ligase	ATP[c] + L-Glutamine[c] + tRNA(Gln)[c] <=> AMP[c] + Diphosphate[c] + Glutaminyl-tRNA(Gln)[c]				Aminoacyl-tRNA biosynthesis	1	-1000	1000	0	2	6.1.1.18	reaction added for synthesis of tRNA(gln)
r1398	SACE_4441steroid delta-isomerase	3beta-Hydroxyandrost-5-en-17-one[c] + NAD[c] <=> Androst-4-ene-3,17-dione[c] + NADH[c] + H[c]	(SACE_4441)	SACE_4441		Androgen and estrogen metabolism	1	-1000	1000	0	2	5.3.3.1
r1399	SACE_4441steroid delta-isomerase	3beta-Hydroxyandrost-5-en-17-one[c] + NADP[c] <=> Androst-4-ene-3,17-dione[c] + NADPH[c] + H[c]	(SACE_4441)	SACE_4441		Androgen and estrogen metabolism	0	0	0	0	2	5.3.3.1
r1400	SACE_1671PheA/TfdB family FAD-binding monooxygenase	Estrone[c] + H[c] + O2[c] + NADH[c] <=> 2-Hydroxyestrone[c] + NAD[c] + H2O[c]	(SACE_1671) or (SACE_3584) or (SACE_6561)	SACE_1671,SACE_3584,SACE_6561		Androgen and estrogen metabolism	1	-1000	1000	0	2	1.14.13.-
r1401	SACE_1671PheA/TfdB family FAD-binding monooxygenase	Estrone[c] + H[c] + O2[c] + NADPH[c] <=> 2-Hydroxyestrone[c] + NADP[c] + H2O[c]	(SACE_1671) or (SACE_3584) or (SACE_6561)	SACE_1671,SACE_3584,SACE_6561		Androgen and estrogen metabolism	0	0	0	0	2	1.14.13.-
r1402	SACE_1671PheA/TfdB family FAD-binding monooxygenase	Estrone[c] + H[c] + O2[c] + NADPH[c] <=> 16alpha-Hydroxyestrone[c] + NADP[c] + H2O[c]	(SACE_1671) or (SACE_3584) or (SACE_6561)	SACE_1671,SACE_3584,SACE_6561		Androgen and estrogen metabolism	1	-1000	1000	0	2	1.14.13.-
r1403	SACE_4441steroid delta-isomerase	Androst-5-ene-3beta,17beta-diol[c] + NAD[c] => Testosterone[c] + H[c] + NADH[c]	(SACE_4441)	SACE_4441		Androgen and estrogen metabolism	0	0	1000	0	2	5.3.3.1
r1404	SACE_4441steroid delta-isomerase	Androst-5-ene-3beta,17beta-diol[c] + NADP[c] => Testosterone[c] + H[c] + NADPH[c]	(SACE_4441)	SACE_4441		Androgen and estrogen metabolism	0	0	1000	0	2	5.3.3.1
r1405	SACE_1671PheA/TfdB family FAD-binding monooxygenase	Estradiol-17beta[c] + H[c] + O2[c] + NADH[c] <=> 2-Hydroxyestradiol-17beta[c] + NAD[c] + H2O[c]	(SACE_1671) or (SACE_3584) or (SACE_6561)	SACE_1671,SACE_3584,SACE_6561		Androgen and estrogen metabolism	1	-1000	1000	0	2	1.14.13.-
r1406	SACE_1671PheA/TfdB family FAD-binding monooxygenase	Estradiol-17beta[c] + H[c] + O2[c] + NADPH[c] <=> Estriol[c] + NADP[c] + H2O[c]	(SACE_1671) or (SACE_3584) or (SACE_6561)	SACE_1671,SACE_3584,SACE_6561		Androgen and estrogen metabolism	1	-1000	1000	0	2	1.14.13.-
r1407	SACE_1671PheA/TfdB family FAD-binding monooxygenase	Estradiol-17beta[c] + H[c] + O2[c] + NADPH[c] <=> 2-Hydroxyestradiol-17beta[c] + NADP[c] + H2O[c]	(SACE_1671) or (SACE_3584) or (SACE_6561)	SACE_1671,SACE_3584,SACE_6561		Androgen and estrogen metabolism	0	0	0	0	2	1.14.13.-
r1408	proable arylsulfatase	estrone3so4[c] + H2O[c] <=> Sulfate[c] + Estrone[c]	(SACE_3101)	SACE_3101		Androgen and estrogen metabolism	1	-1000	1000	0	2	3.1.6.1
r1409	SACE_4441steroid delta-isomerase	16alpha-Hydroxydehydroepiandrosterone[c] + NAD[c] => 16alpha-Hydroxyandrost-4-ene-3,17-dione[c] + H[c] + NADH[c]	(SACE_4441)	SACE_4441		Androgen and estrogen metabolism	0	0	1000	0	2	5.3.3.1
r1410	SACE_4441steroid delta-isomerase	16alpha-Hydroxydehydroepiandrosterone[c] + NADP[c] => 16alpha-Hydroxyandrost-4-ene-3,17-dione[c] + H[c] + NADPH[c]	(SACE_4441)	SACE_4441		Androgen and estrogen metabolism	0	0	1000	0	2	5.3.3.1
r1411	SACE_0626putative tRNA/rRNA methyltransferase	2-Hydroxyestradiol-17beta[c] + amet[c] <=> 2-Methoxyestradiol-17beta[c] + ahcys[c]	(SACE_0626) or (SACE_1075) or (SACE_1452) or (SACE_1814) or (SACE_2602) or (SACE_2878) or (SACE_4650) or (SACE_5595) or (SACE_6107) or (SACE_6809)	SACE_0626,SACE_1075,SACE_1452,SACE_1814,SACE_2602,SACE_2878,SACE_4650,SACE_5595,SACE_6107,SACE_6809		Androgen and estrogen metabolism	1	-1000	1000	0	2	2.1.1.-
r1412	SACE_1995putative flavoprotein monooxygenase acting on aromatic compound	1-Hydroxy-2-naphthoate[c] + NADH[c] + H[c] + O2[c] <=> Naphthalene-1,2-diol[c] + CO2[c] + NAD[c] + H2O[c]	(SACE_1995)	SACE_1995		Naphthalene and anthracene degradation	1	-1000	1000	0	2	1.14.13.1
r1413	SACE_1671PheA/TfdB family FAD-binding monooxygenase	Phenanthracene[c] + O2[c] + NADH[c] + H[c] <=> Phenanthrene-9,10-oxide[c] + H2O[c] + NAD[c]	(SACE_1671) or (SACE_3584) or (SACE_6561)	SACE_1671,SACE_3584,SACE_6561		Naphthalene and anthracene degradation	1	-1000	1000	0	2	1.14.13.-
r1414	SACE_1671PheA/TfdB family FAD-binding monooxygenase	Phenanthracene[c] + O2[c] + NADH[c] + H[c] <=> Phenanthrene-1,2-oxide[c] + H2O[c] + NAD[c]	(SACE_1671) or (SACE_3584) or (SACE_6561)	SACE_1671,SACE_3584,SACE_6561		Naphthalene and anthracene degradation	1	-1000	1000	0	2	1.14.13.-
r1415	SACE_1671PheA/TfdB family FAD-binding monooxygenase	Phenanthracene[c] + O2[c] + NADH[c] + H[c] <=> 1-Phenanthrol[c] + H2O[c] + NAD[c]	(SACE_1671) or (SACE_3584) or (SACE_6561)	SACE_1671,SACE_3584,SACE_6561		Naphthalene and anthracene degradation	1	-1000	1000	0	2	1.14.13.-
r1416	SACE_0626putative tRNA/rRNA methyltransferase	1-Phenanthrol[c] + CH3-R[c] <=> 1-Methoxyphenanthrene[c] + R[c]	(SACE_0626) or (SACE_1075) or (SACE_1452) or (SACE_1814) or (SACE_2602) or (SACE_2878) or (SACE_4650) or (SACE_5595) or (SACE_6107) or (SACE_6809)	SACE_0626,SACE_1075,SACE_1452,SACE_1814,SACE_2602,SACE_2878,SACE_4650,SACE_5595,SACE_6107,SACE_6809		Naphthalene and anthracene degradation	1	-1000	1000	0	2	2.1.1.-
r1417	SACE_3906haloalkane dehalogenase	beta-1,2,3,4,5,6-Hexachlorocyclohexane[c] + H2O[c] <=> beta-2,3,4,5,6-Pentachlorocyclohexanol[c] + HCl[c]	(SACE_3906) or (SACE_5821)	SACE_3906,SACE_5821		Naphthalene and anthracene degradation	1	-1000	1000	0	2	3.8.1.5
r1418	SACE_3906haloalkane dehalogenase	beta-2,3,4,5,6-Pentachlorocyclohexanol[c] + H2O[c] <=> beta-2,3,5,6-Tetrachloro-1,4-cyclohexanediol[c] + HCl[c]	(SACE_3906) or (SACE_5821)	SACE_3906,SACE_5821		Naphthalene and anthracene degradation	1	-1000	1000	0	2	3.8.1.5
r1419	cytochrome P450-like enzyme	Anthracene[c] + O2[c] + 2 H[c] + 2 e-[c] <=> Anthracene-9,10-dihydrodiol[c]	(SACE_0229) or (SACE_0651) or (SACE_0730) or (SACE_1158) or (SACE_1426) or (SACE_2622) or (SACE_2631) or (SACE_3308) or (SACE_4142) or (SACE_4562) or (SACE_4818) or (SACE_5814) or (SACE_5939) or (SACE_6112)	SACE_0229,SACE_0651,SACE_0730,SACE_1158,SACE_1426,SACE_2622,SACE_2631,SACE_3308,SACE_4142,SACE_4562,SACE_4818,SACE_5814,SACE_5939,SACE_6112		Naphthalene and anthracene degradation	1	-1000	1000	0	2	1.14.-.-
r1420	cytochrome P450-like enzyme	pba[c] + O2[c] <=> Phenol[c] + H2O[c]	(SACE_0229) or (SACE_0651) or (SACE_0730) or (SACE_1158) or (SACE_1426) or (SACE_2622) or (SACE_2631) or (SACE_3308) or (SACE_4142) or (SACE_4562) or (SACE_4818) or (SACE_5814) or (SACE_5939) or (SACE_6112)	SACE_0229,SACE_0651,SACE_0730,SACE_1158,SACE_1426,SACE_2622,SACE_2631,SACE_3308,SACE_4142,SACE_4562,SACE_4818,SACE_5814,SACE_5939,SACE_6112		Naphthalene and anthracene degradation	1	-1000	1000	0	2	1.14.-.-
r1421	cytochrome P450-like enzyme	Aniline[c] + O2[c] <=> Catechol[c] + NH3[c]	(SACE_0229) or (SACE_0651) or (SACE_0730) or (SACE_1158) or (SACE_1426) or (SACE_2622) or (SACE_2631) or (SACE_3308) or (SACE_4142) or (SACE_4562) or (SACE_4818) or (SACE_5814) or (SACE_5939) or (SACE_6112)	SACE_0229,SACE_0651,SACE_0730,SACE_1158,SACE_1426,SACE_2622,SACE_2631,SACE_3308,SACE_4142,SACE_4562,SACE_4818,SACE_5814,SACE_5939,SACE_6112		Naphthalene and anthracene degradation	1	-1000	1000	0	2	1.14.-.-
r1422	cytochrome P450-like enzyme	Nitrobenzene[c] + O2[c] <=> Catechol[c] + Nitrite[c]	(SACE_0229) or (SACE_0651) or (SACE_0730) or (SACE_1158) or (SACE_1426) or (SACE_2622) or (SACE_2631) or (SACE_3308) or (SACE_4142) or (SACE_4562) or (SACE_4818) or (SACE_5814) or (SACE_5939) or (SACE_6112)	SACE_0229,SACE_0651,SACE_0730,SACE_1158,SACE_1426,SACE_2622,SACE_2631,SACE_3308,SACE_4142,SACE_4562,SACE_4818,SACE_5814,SACE_5939,SACE_6112		Naphthalene and anthracene degradation	1	-1000	1000	0	2	1.14.-.-
r1423	SACE_1671PheA/TfdB family FAD-binding monooxygenase	Salicylate[c] + NADH[c] + O2[c] + H[c] <=> 2,5-Dihydroxybenzoate[c] + NAD[c] + H2O[c]	(SACE_1671) or (SACE_3584) or (SACE_6561)	SACE_1671,SACE_3584,SACE_6561		Naphthalene and anthracene degradation	1	-1000	1000	0	2	1.14.13.-
r1424	SACE_1671PheA/TfdB family FAD-binding monooxygenase	Salicylate[c] + NADPH[c] + O2[c] + H[c] <=> 2,5-Dihydroxybenzoate[c] + NADP[c] + H2O[c]	(SACE_1671) or (SACE_3584) or (SACE_6561)	SACE_1671,SACE_3584,SACE_6561		Naphthalene and anthracene degradation	0	0	0	0	2	1.14.13.-
r1425	SACE_1995putative flavoprotein monooxygenase acting on aromatic compound	Salicylate[c] + O2[c] + NADH[c] + H[c] <=> Catechol[c] + CO2[c] + NAD[c] + H2O[c]	(SACE_1995)	SACE_1995		Naphthalene and anthracene degradation	1	-1000	1000	0	2	1.14.13.1
r1426	putative alpha-galactosidase	H2O[c] + Globotriaosylceramide[c] => D-Galactose[c] + Lactosylceramide[c]	(SACE_3139) or (SACE_7065)	SACE_3139,SACE_7065		Glycosphingolipid biosynthesis - globoseries	0	0	1000	0	2	3.2.1.22
r1427	beta-N-acetylglucosaminidase （putative secreted protein)	H2O[c] + Globoside[c] => N-Acetyl-D-galactosamine[c] + Globotriaosylceramide[c]	(SACE_0363) or (SACE_3851)	SACE_0363,SACE_3851		Glycosphingolipid biosynthesis - globoseries	0	0	1000	0	2	3.2.1.52
r1428	beta-N-acetylglucosaminidase （putative secreted protein)	GM2[c] + H2O[c] <=> GM3[c] + N-Acetyl-D-galactosamine[c]	(SACE_0363) or (SACE_3851)	SACE_0363,SACE_3851		Glycosphingolipid biosynthesis - ganglioseries	1	-1000	1000	0	2	3.2.1.52
r1429	beta-galactosidase	GM1[c] + H2O[c] <=> GM2[c] + D-Galactose[c]	(SACE_0306) or (SACE_1940) or (SACE_5154) or (SACE_6726)	SACE_0306,SACE_1940,SACE_5154,SACE_6726		Glycosphingolipid biosynthesis - ganglioseries	1	-1000	1000	0	2	3.2.1.23
r1430	putative undecaprenyl pyrophosphate synthetase	trans,trans,cis-ggdp[c] + 7 ipdp[c] <=> dtpcudcpp[c] + 7 Diphosphate[c]	(SACE_0919) or (SACE_1494)	SACE_0919,SACE_1494		Terpenoid biosynthesis	1	-1000	1000	0	2	2.5.1.31
r1431	putative 2-hydroxyhepta-2,4-diene-1,7-dioate isomerase	34hpp[c] <=> 4-Hydroxyphenylacetaldehyde[c] + CO2[c]	(SACE_1233) or (SACE_3828) or (SACE_3938) or (SACE_6202)	SACE_1233,SACE_3828,SACE_3938,SACE_6202		Alkaloid biosynthesis I	1	-1000	1000	0	2	4.1.1.- 5.3.3.-
r1432	carboxylesterase	Cocaine[c] + H2O[c] <=> ecgonineme[c] + Benzoate[c]	(SACE_3662) or (SACE_3682)	SACE_3662,SACE_3682		Alkaloid biosynthesis II	1	-1000	1000	0	2	3.1.1.1
r1433	SACE_2855putative heroin esterase, chain A	ecgonineme[c] + H2O[c] <=> Ecgonine[c] + Methanol[c]	(SACE_2855) or (SACE_4169)	SACE_2855,SACE_4169		Alkaloid biosynthesis II	1	-1000	1000	0	2	3.1.1.-
r1434	SACE_3052medium-chain acyl-CoA ligase	Pseudoecgonine[c] + ATP[c] + CoA[c] <=> Pseudoecgonyl-CoA[c] + AMP[c]	(SACE_3052) or (SACE_6372) or (SACE_6950)	SACE_3052,SACE_6372,SACE_6950		Alkaloid biosynthesis II	1	-1000	1000	0	2	6.2.1.-
r1435	SACE_1671PheA/TfdB family FAD-binding monooxygenase	biophenolA[c] + NADH[c] + H[c] + O2[c] <=> 1,2-Bis(4-hydroxyphenyl)-2-propanol[c] + NAD[c] + H2O[c]	(SACE_1671) or (SACE_3584) or (SACE_6561)	SACE_1671,SACE_3584,SACE_6561		biophenolA degradation	1	-1000	1000	0	2	1.14.13.-
r1436	SACE_1671PheA/TfdB family FAD-binding monooxygenase	biophenolA[c] + NADH[c] + H[c] + O2[c] <=> 2,2-Bis(4-hydroxyphenyl)-1-propanol[c] + NAD[c] + H2O[c]	(SACE_1671) or (SACE_3584) or (SACE_6561)	SACE_1671,SACE_3584,SACE_6561		biophenolA degradation	1	-1000	1000	0	2	1.14.13.-
r1437	SACE_1671PheA/TfdB family FAD-binding monooxygenase	2,2-Bis(4-hydroxyphenyl)-1-propanol[c] + NADH[c] + H[c] + O2[c] <=> 2,3-Bis(4-hydroxyphenyl)-1,2-propanediol[c] + NAD[c] + H2O[c]	(SACE_1671) or (SACE_3584) or (SACE_6561)	SACE_1671,SACE_3584,SACE_6561		biophenolA degradation	1	-1000	1000	0	2	1.14.13.-
r1438	SACE_1671PheA/TfdB family FAD-binding monooxygenase	4-Ethylphenol[c] + NADPH[c] + H[c] + O2[c] <=> 1-(4'-Hydroxyphenyl)ethanol[c] + NADP[c] + H2O[c]	(SACE_1671) or (SACE_3584) or (SACE_6561)	SACE_1671,SACE_3584,SACE_6561		biophenolA degradation	1	-1000	1000	0	2	1.14.13.-
r1439	SACE_2747short chain dehydrogenase/reductase family oxidoreductase	1-(4'-Hydroxyphenyl)ethanol[c] + NAD[c] <=> 4'-Hydroxyacetophenone[c] + NADH[c] + H[c]	(SACE_2747) or (SACE_3080) or (SACE_4387) or (SACE_4696) or (SACE_5586) or (SACE_7048)	SACE_2747,SACE_3080,SACE_4387,SACE_4696,SACE_5586,SACE_7048		biophenolA degradation	1	-1000	1000	0	2	1.1.1.-
r1440	acetyl-CoA hydrolase/transferase	n2msucca[c] + Succinyl-CoA[c] <=> Naphthyl-2-methyl-succinyl-CoA[c] + Succinate[c]	(SACE_5861)	SACE_5861		1- and 2-Methylnaphthalene degradation	1	-1000	1000	0	2	2.8.3.-
r1441	acyl-CoA dehydrogenase	Naphthyl-2-methyl-succinyl-CoA[c] <=> Naphthyl-2-methylene-succinyl-CoA[c] + 2 H[c]	(SACE_0645) or (SACE_1457) or (SACE_3133) or (SACE_3243) or (SACE_3566) or (SACE_3580) or (SACE_4005) or (SACE_4589) or (SACE_5041) or (SACE_5168) or (SACE_5383) or (SACE_7242)	SACE_0645,SACE_1457,SACE_3133,SACE_3243,SACE_3566,SACE_3580,SACE_4005,SACE_4589,SACE_5041,SACE_5168,SACE_5383,SACE_7242		1- and 2-Methylnaphthalene degradation	1	-1000	1000	0	2	1.3.99.-
r1442	SACE_5883N-acetylglutamate synthase	Naphthyl-2-oxomethyl-succinyl-CoA[c] + CoA[c] <=> 2-Naphthoyl-CoA[c] + Succinyl-CoA[c]	(SACE_5883) or (SACE_5884) or (SACE_6204)	SACE_5883,SACE_5884,SACE_6204		1- and 2-Methylnaphthalene degradation	1	-1000	1000	0	2	2.3.1.-
r1443	SACE_1995putative flavoprotein monooxygenase acting on aromatic compound	3-Methylsalicylate[c] + O2[c] + NADH[c] + H[c] <=> 2,3-Dihydroxytoluene[c] + NAD[c] + CO2[c] + H2O[c]	(SACE_1995)	SACE_1995		1- and 2-Methylnaphthalene degradation	1	-1000	1000	0	2	1.14.13.1
r1444	SACE_1671PheA/TfdB family FAD-binding monooxygenase	1-Methylnaphthalene[c] + O2[c] + NADH[c] + H[c] <=> 1-Hydroxymethylnaphthalene[c] + NAD[c] + H2O[c]	(SACE_1671) or (SACE_3584) or (SACE_6561)	SACE_1671,SACE_3584,SACE_6561		1- and 2-Methylnaphthalene degradation	1	-1000	1000	0	2	1.14.13.-
r1445	SACE_1535putative zinc-type alcohol dehydrogenase transmembrane protein	1-Hydroxymethylnaphthalene[c] + NAD[c] <=> 1-Naphthaldehyde[c] + NADH[c] + H[c]	(SACE_1535) or (SACE_2374) or (SACE_2733) or (SACE_2738) or (SACE_2944) or (SACE_2945) or (SACE_3519) or (SACE_4085) or (SACE_4163) or (SACE_4519) or (SACE_4852) or (SACE_6396)	SACE_1535,SACE_2374,SACE_2733,SACE_2738,SACE_2944,SACE_2945,SACE_3519,SACE_4085,SACE_4163,SACE_4519,SACE_4852,SACE_6396		1- and 2-Methylnaphthalene degradation	1	-1000	1000	0	2	1.1.1.1
r1446	putative 2-hydroxyhepta-2,4-diene-1,7-dioate isomerase	2-Hydroxyisophthalica[c] <=> Salicylate[c] + CO2[c]	(SACE_1233) or (SACE_3828) or (SACE_3938) or (SACE_6202)	SACE_1233,SACE_3828,SACE_3938,SACE_6202		1- and 2-Methylnaphthalene degradation	1	-1000	1000	0	2	4.1.1.- 5.3.3.-
r1447	SACE_1671PheA/TfdB family FAD-binding monooxygenase	2-Methylnaphthalene[c] + O2[c] + NADH[c] + H[c] <=> (2-Naphthyl)methanol[c] + NAD[c] + H2O[c]	(SACE_1671) or (SACE_3584) or (SACE_6561)	SACE_1671,SACE_3584,SACE_6561		1- and 2-Methylnaphthalene degradation	1	-1000	1000	0	2	1.14.13.-
r1448	SACE_1535putative zinc-type alcohol dehydrogenase transmembrane protein	(2-Naphthyl)methanol[c] + NAD[c] <=> 2-Naphthaldehyde[c] + NADH[c] + H[c]	(SACE_1535) or (SACE_2374) or (SACE_2733) or (SACE_2738) or (SACE_2944) or (SACE_2945) or (SACE_3519) or (SACE_4085) or (SACE_4163) or (SACE_4519) or (SACE_4852) or (SACE_6396)	SACE_1535,SACE_2374,SACE_2733,SACE_2738,SACE_2944,SACE_2945,SACE_3519,SACE_4085,SACE_4163,SACE_4519,SACE_4852,SACE_6396		1- and 2-Methylnaphthalene degradation	1	-1000	1000	0	2	1.1.1.1
r1449	SACE_1995putative flavoprotein monooxygenase acting on aromatic compound	4-Hydroxymethylsalicylate[c] + O2[c] + NADH[c] + H[c] <=> 4-Hydroxymethylcatechol[c] + NAD[c] + H2O[c] + CO2[c]	(SACE_1995)	SACE_1995		1- and 2-Methylnaphthalene degradation	1	-1000	1000	0	2	1.14.13.1
r1450	SACE_1995putative flavoprotein monooxygenase acting on aromatic compound	4-Methylsalicylate[c] + O2[c] + NADH[c] + H[c] <=> 4-Methylcatechol[c] + NAD[c] + H2O[c] + CO2[c]	(SACE_1995)	SACE_1995		1- and 2-Methylnaphthalene degradation	1	-1000	1000	0	2	1.14.13.1
r1451	SACE_5883N-acetylglutamate synthase	2-Naphthoyl-CoA[c] + H2O[c] <=> 2napha[c] + CoA[c]	(SACE_5883) or (SACE_5884) or (SACE_6204)	SACE_5883,SACE_5884,SACE_6204		1- and 2-Methylnaphthalene degradation	1	-1000	1000	0	2	2.3.1.-
r1452	hydroxydechloroatrazine ethylaminohydrolase	2-Chloro-4-hydroxy-6-amino-1,3,5-triazine[c] + H2O[c] <=> 2,4-Dihydroxy-6-amino-1,3,5-triazine[c] + HCl[c]	(SACE_1262)	SACE_1262		Atrazine degradation	1	-1000	1000	0	2	3.5.4.43
r1453	SACE_0662cytosine deaminase or related metal-dependent hydrolase	Cyromazine[c] + H2O[c] <=> N-Cyclopropylammeline[c] + NH3[c]	(SACE_0662)	SACE_0662		Atrazine degradation	1	-1000	1000	0	2	3.5.4.-
r1454	SACE_0662cytosine deaminase or related metal-dependent hydrolase	N-Cyclopropylammeline[c] + H2O[c] <=> N-Cyclopropylammelide[c] + NH3[c]	(SACE_0662)	SACE_0662		Atrazine degradation	1	-1000	1000	0	2	3.5.4.-
r1455	SACE_0662cytosine deaminase or related metal-dependent hydrolase	N-Cyclopropylammelide[c] + H2O[c] <=> Cyanurica[c] + Cyclopropylamine[c]	(SACE_0662)	SACE_0662		Atrazine degradation	1	-1000	1000	0	2	3.5.4.-
r1456	allophanate hydrolase	Urea-1-carboxylate[c] + H2O[c] => 2 CO2[c] + 2 NH3[c]	(SACE_1551 and SACE_1552)	SACE_1551,SACE_1552		Atrazine degradation	0	0	1000	0	2	3.5.1.54
r1457	hydroxydechloroatrazine ethylaminohydrolase	Hydroxyatrazine[c] + H2O[c] => N-Isopropylammelide[c] + Ethylamine[c]	(SACE_1262)	SACE_1262		Atrazine degradation	0	0	1000	0	2	3.5.4.43
r1458	N-ethylammeline chlorohydrolase	Deisopropylatrazine[c] + H2O[c] => Deisopropylhydroxyatrazine[c] + HCl[c]	(SACE_7247)	SACE_7247		Atrazine degradation	0	0	1000	0	2	3.8.1.-
r1459	SACE_2873glutathione S-transferase	(1R,2S)-Naphthalene 1,2-oxide[c] + Glutathione[c] <=> (1R)-Hydroxy-(2R)-glutathionyl-1,2-dihydronaphthalene[c]	(SACE_2873)	SACE_2873		Metabolism of xenobiotics by cytochrome P450	1	-1000	1000	0	2	2.5.1.18
r1460	SACE_2873glutathione S-transferase	(1S,2R)-Naphthalene 1,2-oxide[c] + Glutathione[c] <=> (1R)-Glutathionyl-(2R)-hydroxy-1,2-dihydronaphthalene[c]	(SACE_2873)	SACE_2873		Metabolism of xenobiotics by cytochrome P450	1	-1000	1000	0	2	2.5.1.18
r1461	SACE_2873glutathione S-transferase	(1S,2R)-Naphthalene 1,2-oxide[c] + Glutathione[c] <=> (1S)-Hydroxy-(2S)-glutathionyl-1,2-dihydronaphthalene[c]	(SACE_2873)	SACE_2873		Metabolism of xenobiotics by cytochrome P450	1	-1000	1000	0	2	2.5.1.18
r1462	SACE_3441epoxide hydrolase	(1R,2S)-Naphthalene 1,2-oxide[c] + H2O[c] <=> 1,2-Dihydronaphthalene-1,2-diol[c]	(SACE_3441)	SACE_3441		Metabolism of xenobiotics by cytochrome P450	1	-1000	1000	0	2	3.3.2.9
r1463	SACE_3441epoxide hydrolase	(1S,2R)-Naphthalene 1,2-oxide[c] + H2O[c] <=> 1,2-Dihydronaphthalene-1,2-diol[c]	(SACE_3441)	SACE_3441		Metabolism of xenobiotics by cytochrome P450	1	-1000	1000	0	2	3.3.2.9
r1464	SACE_2873glutathione S-transferase	1-Nitronaphthalene-7,8-oxide[c] + Glutathione[c] <=> 1-Nitro-7-hydroxy-8-glutathionyl-7,8-dihydronaphthalene[c]	(SACE_2873)	SACE_2873		Metabolism of xenobiotics by cytochrome P450	1	-1000	1000	0	2	2.5.1.18
r1465	SACE_2873glutathione S-transferase	1-Nitronaphthalene-7,8-oxide[c] + Glutathione[c] <=> 1-Nitro-7-glutathionyl-8-hydroxy-7,8-dihydronaphthalene[c]	(SACE_2873)	SACE_2873		Metabolism of xenobiotics by cytochrome P450	1	-1000	1000	0	2	2.5.1.18
r1466	SACE_2873glutathione S-transferase	1-Nitronaphthalene-5,6-oxide[c] + Glutathione[c] <=> 1-Nitro-5-hydroxy-6-glutathionyl-5,6-dihydronaphthalene[c]	(SACE_2873)	SACE_2873		Metabolism of xenobiotics by cytochrome P450	1	-1000	1000	0	2	2.5.1.18
r1467	SACE_2873glutathione S-transferase	1-Nitronaphthalene-5,6-oxide[c] + Glutathione[c] <=> 1-Nitro-5-glutathionyl-6-hydroxy-5,6-dihydronaphthalene[c]	(SACE_2873)	SACE_2873		Metabolism of xenobiotics by cytochrome P450	1	-1000	1000	0	2	2.5.1.18
r1468	SACE_3441epoxide hydrolase	1-Nitronaphthalene-5,6-oxide[c] + H2O[c] <=> 1-Nitro-5,6-dihydroxy-dihydronaphthalene[c]	(SACE_3441)	SACE_3441		Metabolism of xenobiotics by cytochrome P450	1	-1000	1000	0	2	3.3.2.9
r1469	SACE_2873glutathione S-transferase	Bromobenzene-3,4-oxide[c] + Glutathione[c] <=> 3,4-Dihydro-3-hydroxy-4-S-glutathionyl-bromobenzene[c]	(SACE_2873)	SACE_2873		Metabolism of xenobiotics by cytochrome P450	1	-1000	1000	0	2	2.5.1.18
r1470	SACE_2873glutathione S-transferase	Bromobenzene-2,3-oxide[c] + Glutathione[c] <=> 2,3-Dihydro-2-S-glutathionyl-3-hydroxy-bromobenzene[c]	(SACE_2873)	SACE_2873		Metabolism of xenobiotics by cytochrome P450	1	-1000	1000	0	2	2.5.1.18
r1471	SACE_3441epoxide hydrolase	Bromobenzene-3,4-oxide[c] + H2O[c] <=> Bromobenzene-3,4-dihydrodiol[c]	(SACE_3441)	SACE_3441		Metabolism of xenobiotics by cytochrome P450	1	-1000	1000	0	2	3.3.2.9
r1472	SACE_3441epoxide hydrolase	Bromobenzene-2,3-oxide[c] + H2O[c] <=> Bromobenzene-2,3-dihydrodiol[c]	(SACE_3441)	SACE_3441		Metabolism of xenobiotics by cytochrome P450	1	-1000	1000	0	2	3.3.2.9
r1473	SACE_3441epoxide hydrolase	Benzo[a]pyrene-7,8-oxide[c] + H2O[c] <=> Benzo[a]pyrene-7,8-diol[c]	(SACE_3441)	SACE_3441		Metabolism of xenobiotics by cytochrome P450	1	-1000	1000	0	2	3.3.2.9
r1474	SACE_2873glutathione S-transferase	Benzo[a]pyrene-4,5-oxide[c] + Glutathione[c] <=> 4,5-Dihydro-4-hydroxy-5-S-glutathionyl-benzo[a]pyrene[c]	(SACE_2873)	SACE_2873		Metabolism of xenobiotics by cytochrome P450	1	-1000	1000	0	2	2.5.1.18
r1475	SACE_2873glutathione S-transferase	Benzo[a]pyrene-7,8-diol[c] + Glutathione[c] <=> 7,8-Dihydro-7-hydroxy-8-S-glutathionyl-benzo[a]pyrene[c] + H2O[c]	(SACE_2873)	SACE_2873		Metabolism of xenobiotics by cytochrome P450	1	-1000	1000	0	2	2.5.1.18
r1476	SACE_2873glutathione S-transferase	2,2-Dichloroacetaldehyde[c] + Glutathione[c] <=> S-(2,2-Dichloro-1-hydroxy)ethyl-glutathione[c]	(SACE_2873)	SACE_2873		Metabolism of xenobiotics by cytochrome P450	1	-1000	1000	0	2	2.5.1.18
r1477	SACE_2873glutathione S-transferase	11dichlorepo[c] + Glutathione[c] <=> 2sgluacechlor[c] + HCl[c]	(SACE_2873)	SACE_2873		Metabolism of xenobiotics by cytochrome P450	1	-1000	1000	0	2	2.5.1.18
r1478	SACE_2873glutathione S-transferase	chlorochlori[c] + Glutathione[c] <=> S-(2-Chloroacetyl)glutathione[c] + HCl[c]	(SACE_2873)	SACE_2873		Metabolism of xenobiotics by cytochrome P450	1	-1000	1000	0	2	2.5.1.18
r1479	SACE_2873glutathione S-transferase	2sgluacechlor[c] + Glutathione[c] <=> 2-(S-Glutathionyl)acetyl-glutathione[c] + HCl[c]	(SACE_2873)	SACE_2873		Metabolism of xenobiotics by cytochrome P450	1	-1000	1000	0	2	2.5.1.18
r1480	SACE_2873glutathione S-transferase	Trichloroethene[c] + Glutathione[c] <=> S-(1,2-Dichlorovinyl)glutathione[c] + HCl[c]	(SACE_2873)	SACE_2873		Metabolism of xenobiotics by cytochrome P450	1	-1000	1000	0	2	2.5.1.18
r1481	SACE_1535putative zinc-type alcohol dehydrogenase transmembrane protein	Chloralhydrate[c] + NADH[c] + H[c] <=> Trichloroethanol[c] + NAD[c] + H2O[c]	(SACE_1535) or (SACE_2374) or (SACE_2733) or (SACE_2738) or (SACE_2944) or (SACE_2945) or (SACE_3519) or (SACE_4085) or (SACE_4163) or (SACE_4519) or (SACE_4852) or (SACE_6396)	SACE_1535,SACE_2374,SACE_2733,SACE_2738,SACE_2944,SACE_2945,SACE_3519,SACE_4085,SACE_4163,SACE_4519,SACE_4852,SACE_6396		Metabolism of xenobiotics by cytochrome P450	1	-1000	1000	0	2	1.1.1.1
r1482	SACE_2873glutathione S-transferase	1,2-Dibromoethane[c] + Glutathione[c] <=> Glu-episul-ion[c] + 2 HBr[c]	(SACE_2873)	SACE_2873		Metabolism of xenobiotics by cytochrome P450	1	-1000	1000	0	2	2.5.1.18
r1483	SACE_2873glutathione S-transferase	2-Bromoacetaldehyde[c] + Glutathione[c] <=> S-(Formylmethyl)glutathione[c] + HBr[c]	(SACE_2873)	SACE_2873		Metabolism of xenobiotics by cytochrome P450	1	-1000	1000	0	2	2.5.1.18
r1484	SACE_1309putative peptide monooxygenase	Caffeine[c] + NADPH[c] + O2[c] + H[c] => 1,7-Dimethylxanthine[c] + NADP[c] + Formaldehyde[c] + H2O[c]	(SACE_1309) or (SACE_3033)	SACE_1309,SACE_3033		Caffeine metabolism	0	0	0	0	2	1.13.12.-
r1485	SACE_0058putative acetyltransferase	1,7-Dimethylxanthine[c] => 5-Acetylamino-6-formylamino-3-methyluracil[c]	(SACE_0058)	SACE_0058		Caffeine metabolism	0	0	1000	0	2	2.3.1.5
r1486	SACE_1309putative peptide monooxygenase	Caffeine[c] + NADH[c] + H[c] + O2[c] => 1,7-Dimethylxanthine[c] + NAD[c] + Formaldehyde[c] + H2O[c]	(SACE_1309) or (SACE_3033)	SACE_1309,SACE_3033		Caffeine metabolism	0	0	1000	0	2	1.13.12.-
r1487	SACE_1309putative peptide monooxygenase	Caffeine[c] + NADH[c] + H[c] + O2[c] => Theobromine[c] + NAD[c] + Formaldehyde[c] + H2O[c]	(SACE_1309) or (SACE_3033)	SACE_1309,SACE_3033		Caffeine metabolism	0	0	1000	0	2	1.13.12.-
r1488	SACE_1309putative peptide monooxygenase	Caffeine[c] + NADPH[c] + H[c] + O2[c] => Theobromine[c] + NADP[c] + Formaldehyde[c] + H2O[c]	(SACE_1309) or (SACE_3033)	SACE_1309,SACE_3033		Caffeine metabolism	0	0	0	0	2	1.13.12.-
r1489	SACE_1309putative peptide monooxygenase	1,7-Dimethylxanthine[c] + NADH[c] + H[c] + O2[c] => 7-Methylxanthine[c] + NAD[c] + Formaldehyde[c] + H2O[c]	(SACE_1309) or (SACE_3033)	SACE_1309,SACE_3033		Caffeine metabolism	0	0	1000	0	2	1.13.12.-
r1490	SACE_1309putative peptide monooxygenase	1,7-Dimethylxanthine[c] + NADPH[c] + H[c] + O2[c] => 7-Methylxanthine[c] + NADP[c] + Formaldehyde[c] + H2O[c]	(SACE_1309) or (SACE_3033)	SACE_1309,SACE_3033		Caffeine metabolism	0	0	0	0	2	1.13.12.-
r1491	SACE_1309putative peptide monooxygenase	1,7-Dimethylxanthine[c] + NADH[c] + H[c] + O2[c] => 1-Methylxanthine[c] + NAD[c] + Formaldehyde[c] + H2O[c]	(SACE_1309) or (SACE_3033)	SACE_1309,SACE_3033		Caffeine metabolism	0	0	1000	0	2	1.13.12.-
r1492	SACE_1309putative peptide monooxygenase	1,7-Dimethylxanthine[c] + NADPH[c] + H[c] + O2[c] => 1-Methylxanthine[c] + NADP[c] + Formaldehyde[c] + H2O[c]	(SACE_1309) or (SACE_3033)	SACE_1309,SACE_3033		Caffeine metabolism	0	0	0	0	2	1.13.12.-
r1493	SACE_1309putative peptide monooxygenase	Theobromine[c] + NADH[c] + H[c] + O2[c] => 7-Methylxanthine[c] + NAD[c] + Formaldehyde[c] + H2O[c]	(SACE_1309) or (SACE_3033)	SACE_1309,SACE_3033		Caffeine metabolism	0	0	1000	0	2	1.13.12.-
r1494	SACE_1309putative peptide monooxygenase	Theobromine[c] + NADPH[c] + H[c] + O2[c] => 7-Methylxanthine[c] + NADP[c] + Formaldehyde[c] + H2O[c]	(SACE_1309) or (SACE_3033)	SACE_1309,SACE_3033		Caffeine metabolism	0	0	0	0	2	1.13.12.-
r1495	SACE_1309putative peptide monooxygenase	Theobromine[c] + NADH[c] + H[c] + O2[c] => 3-Methylxanthine[c] + NAD[c] + Formaldehyde[c] + H2O[c]	(SACE_1309) or (SACE_3033)	SACE_1309,SACE_3033		Caffeine metabolism	0	0	1000	0	2	1.13.12.-
r1496	SACE_1309putative peptide monooxygenase	Theobromine[c] + NADPH[c] + H[c] + O2[c] => 3-Methylxanthine[c] + NADP[c] + Formaldehyde[c] + H2O[c]	(SACE_1309) or (SACE_3033)	SACE_1309,SACE_3033		Caffeine metabolism	0	0	0	0	2	1.13.12.-
r1497	SACE_1309putative peptide monooxygenase	7-Methylxanthine[c] + NADH[c] + H[c] + O2[c] => Xanthine[c] + NAD[c] + Formaldehyde[c] + H2O[c]	(SACE_1309) or (SACE_3033)	SACE_1309,SACE_3033		Caffeine metabolism	0	0	1000	0	2	1.13.12.-
r1498	SACE_1309putative peptide monooxygenase	7-Methylxanthine[c] + NADPH[c] + H[c] + O2[c] => Xanthine[c] + NADP[c] + Formaldehyde[c] + H2O[c]	(SACE_1309) or (SACE_3033)	SACE_1309,SACE_3033		Caffeine metabolism	0	0	0	0	2	1.13.12.-
r1499	SACE_1309putative peptide monooxygenase	3-Methylxanthine[c] + NADH[c] + H[c] + O2[c] => Xanthine[c] + NAD[c] + Formaldehyde[c] + H2O[c]	(SACE_1309) or (SACE_3033)	SACE_1309,SACE_3033		Caffeine metabolism	0	0	1000	0	2	1.13.12.-
r1500	SACE_1309putative peptide monooxygenase	3-Methylxanthine[c] + NADPH[c] + H[c] + O2[c] => Xanthine[c] + NADP[c] + Formaldehyde[c] + H2O[c]	(SACE_1309) or (SACE_3033)	SACE_1309,SACE_3033		Caffeine metabolism	0	0	0	0	2	1.13.12.-
r1501	SACE_1309putative peptide monooxygenase	1-Methylxanthine[c] + NADH[c] + H[c] + O2[c] => Xanthine[c] + NAD[c] + Formaldehyde[c] + H2O[c]	(SACE_1309) or (SACE_3033)	SACE_1309,SACE_3033		Caffeine metabolism	0	0	1000	0	2	1.13.12.-
r1502	SACE_1309putative peptide monooxygenase	1-Methylxanthine[c] + NADPH[c] + H[c] + O2[c] => Xanthine[c] + NADP[c] + Formaldehyde[c] + H2O[c]	(SACE_1309) or (SACE_3033)	SACE_1309,SACE_3033		Caffeine metabolism	0	0	0	0	2	1.13.12.-
r1503	SACE_1309putative peptide monooxygenase	Caffeine[c] + NADH[c] + H[c] + O2[c] => Theophylline[c] + NAD[c] + Formaldehyde[c] + H2O[c]	(SACE_1309) or (SACE_3033)	SACE_1309,SACE_3033		Caffeine metabolism	0	0	1000	0	2	1.13.12.-
r1504	SACE_1309putative peptide monooxygenase	Caffeine[c] + NADPH[c] + H[c] + O2[c] => Theophylline[c] + NADP[c] + Formaldehyde[c] + H2O[c]	(SACE_1309) or (SACE_3033)	SACE_1309,SACE_3033		Caffeine metabolism	0	0	0	0	2	1.13.12.-
r1505	SACE_1309putative peptide monooxygenase	Theophylline[c] + NADH[c] + H[c] + O2[c] => 3-Methylxanthine[c] + NAD[c] + Formaldehyde[c] + H2O[c]	(SACE_1309) or (SACE_3033)	SACE_1309,SACE_3033		Caffeine metabolism	0	0	1000	0	2	1.13.12.-
r1506	SACE_1309putative peptide monooxygenase	Theophylline[c] + NADPH[c] + H[c] + O2[c] => 3-Methylxanthine[c] + NADP[c] + Formaldehyde[c] + H2O[c]	(SACE_1309) or (SACE_3033)	SACE_1309,SACE_3033		Caffeine metabolism	0	0	0	0	2	1.13.12.-
r1507	SACE_1309putative peptide monooxygenase	Theophylline[c] + NADH[c] + H[c] + O2[c] => 1-Methylxanthine[c] + NAD[c] + Formaldehyde[c] + H2O[c]	(SACE_1309) or (SACE_3033)	SACE_1309,SACE_3033		Caffeine metabolism	0	0	1000	0	2	1.13.12.-
r1508	SACE_1309putative peptide monooxygenase	Theophylline[c] + NADPH[c] + H[c] + O2[c] => 1-Methylxanthine[c] + NADP[c] + Formaldehyde[c] + H2O[c]	(SACE_1309) or (SACE_3033)	SACE_1309,SACE_3033		Caffeine metabolism	0	0	0	0	2	1.13.12.-
r1509	SACE_6736urate oxidase	137trimea[c] + O2[c] + 2 H2O[c] => 3,6,8-Trimethylallantoin[c] + CO2[c] + H2O2[c]	(SACE_6736)	SACE_6736		Caffeine metabolism	0	0	1000	0	2	1.7.3.3
r1510	carboxylesterase	Capecitabine[c] + H2O[c] <=> 5'-Deoxy-5-fluorocytidine[c] + 1-Pentanol[c] + CO2[c]	(SACE_3662) or (SACE_3682)	SACE_3662,SACE_3682		Drug metabolism - other enzymes	1	-1000	1000	0	2	3.1.1.1
r1511	cytidine deaminase	5'-Deoxy-5-fluorocytidine[c] + H2O[c] <=> 5'-Deoxy-5-fluorouridine[c] + NH3[c]	(SACE_6576)	SACE_6576		Drug metabolism - other enzymes	1	-1000	1000	0	2	3.5.4.5
r1512	thymidine phosphorylase	5'-Deoxy-5-fluorouridine[c] + Orthophosphate[c] <=> 5-FU[c] + 5-Deoxyribose-1-phosphate[c]	(SACE_6575)	SACE_6575		Drug metabolism - other enzymes	1	-1000	1000	0	2	2.4.2.4
r1513	dihydropyrimidinase	5,6-Dihydro-5-fluorouracil[c] + H2O[c] <=> aflburppa[c]	(SACE_3419)	SACE_3419		Drug metabolism - other enzymes	1	-1000	1000	0	2	3.5.2.2
r1514	thymidine phosphorylase	5-FU[c] + 2dr1p[c] <=> 5-Fluorodeoxyuridine[c] + Orthophosphate[c]	(SACE_6575)	SACE_6575		Drug metabolism - other enzymes	1	-1000	1000	0	2	2.4.2.4
r1515	orotate phosphoribosyltransferase	5-FU[c] + prpp[c] <=> 5flurimp[c] + Diphosphate[c]	(SACE_3691) or (SACE_7189)	SACE_3691,SACE_7189		Drug metabolism - other enzymes	1	-1000	1000	0	2	2.4.2.10
r1516	SACE_1035uridine kinase	5-Fluorouridine[c] + ATP[c] <=> 5flurimp[c] + ADP[c]	(SACE_1035)	SACE_1035		Drug metabolism - other enzymes	1	-1000	1000	0	2	2.7.1.48
r1517	hypoxanthine-guanine phosphoribosyltransferase	6-Mercaptopurin[c] + prpp[c] <=> 6tins5mp[c] + Diphosphate[c]	(SACE_0395)	SACE_0395		Drug metabolism - other enzymes	1	-1000	1000	0	2	2.4.2.8
r1518	hypoxanthine-guanine phosphoribosyltransferase	6-Methylmercaptopurine[c] + prpp[c] <=> 6m5mprib[c] + Diphosphate[c]	(SACE_0395)	SACE_0395		Drug metabolism - other enzymes	1	-1000	1000	0	2	2.4.2.8
r1519	inositol-5-monophosphate dehydrogenase	6tins5mp[c] + NAD[c] + H2O[c] <=> 6txan5mp[c] + NADH[c] + H[c]	(SACE_0914) or (SACE_6707) or (SACE_6708)	SACE_0914,SACE_6707,SACE_6708		Drug metabolism - other enzymes	1	-1000	1000	0	2	1.1.1.205
r1520	bifunctional GMP synthase/glutamine amidotransferase protein	6txan5mp[c] + ATP[c] + L-Glutamine[c] + H2O[c] <=> 6tgsnmp[c] + AMP[c] + Diphosphate[c] + L-Glutamate[c]	(SACE_6701)	SACE_6701		Drug metabolism - other enzymes	1	-1000	1000	0	2	6.3.5.2
r1521	hypoxanthine-guanine phosphoribosyltransferase	Thioguanine[c] + prpp[c] <=> 6tgsnmp[c] + Diphosphate[c]	(SACE_0395)	SACE_0395		Drug metabolism - other enzymes	1	-1000	1000	0	2	2.4.2.8
r1522	SACE_0058putative acetyltransferase	Acetyl-CoA[c] + Isoniazid[c] <=> CoA[c] + N-Acetylisoniazid[c]	(SACE_0058)	SACE_0058		Drug metabolism - other enzymes	1	-1000	1000	0	2	2.3.1.5
r1523	SACE_0058putative acetyltransferase	Acetyl-CoA[c] + Acetylhydrazine[c] <=> CoA[c] + N,N'-Diacetylhydrazine[c]	(SACE_0058)	SACE_0058		Drug metabolism - other enzymes	1	-1000	1000	0	2	2.3.1.5
r1524	para-nitrobenzyl esterase	Irinotecan[c] + H2O[c] <=> SN-38[c] + 14bp1carba[c]	(SACE_1410) or (SACE_2543) or (SACE_2896) or (SACE_2933) or (SACE_3657) or (SACE_3662) or (SACE_3672) or (SACE_3682)	SACE_1410,SACE_2543,SACE_2896,SACE_2933,SACE_3657,SACE_3662,SACE_3672,SACE_3682		Drug metabolism - other enzymes	1	-1000	1000	0	2	3.1.1.1
r1525	para-nitrobenzyl esterase	NPC[c] + H2O[c] <=> SN-38[c] + 4a1pcc[c]	(SACE_1410) or (SACE_2543) or (SACE_2896) or (SACE_2933) or (SACE_3657) or (SACE_3672)	SACE_1410,SACE_2543,SACE_2896,SACE_2933,SACE_3657,SACE_3672		Drug metabolism - other enzymes	1	-1000	1000	0	2	3.1.1.1
r1526	SACE_2873glutathione S-transferase	Aldophosphamide[c] + Glutathione[c] <=> 4gtcyclpo[c] + H2O[c]	(SACE_2873)	SACE_2873		Drug metabolism - cytochrome P450	1	-1000	1000	0	2	2.5.1.18
r1527	SACE_1535putative zinc-type alcohol dehydrogenase transmembrane protein	Aldophosphamide[c] + NADH[c] + H[c] <=> Alcophosphamide[c] + NAD[c]	(SACE_1535) or (SACE_2374) or (SACE_2733) or (SACE_2738) or (SACE_2944) or (SACE_2945) or (SACE_3519) or (SACE_4085) or (SACE_4163) or (SACE_4519) or (SACE_4852) or (SACE_6396)	SACE_1535,SACE_2374,SACE_2733,SACE_2738,SACE_2944,SACE_2945,SACE_3519,SACE_4085,SACE_4163,SACE_4519,SACE_4852,SACE_6396		Drug metabolism - cytochrome P450	1	-1000	1000	0	2	1.1.1.1
r1528	SACE_1535putative zinc-type alcohol dehydrogenase transmembrane protein	2p13pm[c] + NAD[c] <=> 3-Carbamoyl-2-phenylpropionaldehyde[c] + NADH[c] + H[c]	(SACE_1535) or (SACE_2374) or (SACE_2733) or (SACE_2738) or (SACE_2944) or (SACE_2945) or (SACE_3519) or (SACE_4085) or (SACE_4163) or (SACE_4519) or (SACE_4852) or (SACE_6396)	SACE_1535,SACE_2374,SACE_2733,SACE_2738,SACE_2944,SACE_2945,SACE_3519,SACE_4085,SACE_4163,SACE_4519,SACE_4852,SACE_6396		Drug metabolism - cytochrome P450	1	-1000	1000	0	2	1.1.1.1
r1529	SACE_1535putative zinc-type alcohol dehydrogenase transmembrane protein	4-Hydroxy-5-phenyltetrahydro-1,3-oxazin-2-one[c] + NAD[c] <=> 5-Phenyl-1,3-oxazinane-2,4-dione[c] + NADH[c] + H[c]	(SACE_1535) or (SACE_2374) or (SACE_2733) or (SACE_2738) or (SACE_2944) or (SACE_2945) or (SACE_3519) or (SACE_4085) or (SACE_4163) or (SACE_4519) or (SACE_4852) or (SACE_6396)	SACE_1535,SACE_2374,SACE_2733,SACE_2738,SACE_2944,SACE_2945,SACE_3519,SACE_4085,SACE_4163,SACE_4519,SACE_4852,SACE_6396		Drug metabolism - cytochrome P450	1	-1000	1000	0	2	1.1.1.1
r1530	putative flavin-containing monoamine oxidase	Citalopram[c] + O2[c] + H2O[c] <=> citalald[c] + Dimethylamine[c] + H2O2[c]	(SACE_4116) or (SACE_4854)	SACE_4116,SACE_4854		Drug metabolism - cytochrome P450	1	-1000	1000	0	2	1.4.3.4
r1531	putative flavin-containing monoamine oxidase	Demethylcitalopram[c] + O2[c] + H2O[c] <=> citalald[c] + Methylamine[c] + H2O2[c]	(SACE_4116) or (SACE_4854)	SACE_4116,SACE_4854		Drug metabolism - cytochrome P450	1	-1000	1000	0	2	1.4.3.4
r1532	putative flavin-containing monoamine oxidase	Didemethylcitalopram[c] + H2O[c] + O2[c] <=> citalald[c] + NH3[c] + H2O2[c]	(SACE_4116) or (SACE_4854)	SACE_4116,SACE_4854		Drug metabolism - cytochrome P450	1	-1000	1000	0	2	1.4.3.4
r1533	NADH:acceptor oxidoreductase	Acceptor[c] + NADH[c] + H[c] => acceptor(Reduced)[c] + NAD[c]	(SACE_0853) or (SACE_1119) or (SACE_2978)	SACE_0853,SACE_1119,SACE_2978		Oxydative phosphorilation	0	0	1000	0	2	1.6.99.3
r1534	NADH-quinone oxidoreductase subunit N	Q[c] + NADH[c] + H[c] => QH2[c] + NAD[c]	(SACE_6889 and SACE_6890 and SACE_6891 and SACE_6892 and SACE_6893 and SACE_6894 and SACE_6895 and SACE_6896 and SACE_6897 and SACE_6898 and SACE_6899 and SACE_6900 and SACE_6901 and SACE_6902)	SACE_6889,SACE_6890,SACE_6891,SACE_6892,SACE_6893,SACE_6894,SACE_6895,SACE_6896,SACE_6897,SACE_6898,SACE_6899,SACE_6900,SACE_6901,SACE_6902		Oxydative phosphorilation	0	0	1000	0	2	1.6.5.3
r1535	ubiquinol:oxygen oxidoreductase (non-electrogenic)	2 QH2[c] + O2[c] => 2 Q[c] + 2 H2O[c]	((SACE_0142) and (SACE_2955)) or ((SACE_0143) and (SACE_2956))	SACE_0142,SACE_2955,SACE_0143,SACE_2956		Oxydative phosphorilation	0	0	1000	0	2	1.10.3.11
r1536	diphosphate phosphohydrolase	Diphosphate[c] + H2O[c] => 2 Orthophosphate[c]	(SACE_6140 and (SACE_6279 or SACE_5295))	SACE_6140,SACE_6279,SACE_5295		Oxydative phosphorilation	0	0	1000	0	2	3.6.1.1	reaction added to complete oxidative phosphorylation
r1537	F-type H+-transporting ATPase subunit	ADP[c] + Orthophosphate[c] => ATP[c] + H2O[c]	(SACE_5295 and SACE_6279 and SACE_6280 and SACE_6281 and SACE_6282 and SACE_6283 and SACE_6284 and SACE_6285 and SACE_6286)	SACE_5295,SACE_6279,SACE_6280,SACE_6281,SACE_6282,SACE_6283,SACE_6284,SACE_6285,SACE_6286		Oxydative phosphorilation	0	0	0	0	2	3.6.3.14
r1538	quinol monooxygenase (Ubiquinol-8)	2 O2[c] + QH2[c] <=> 2 H[c] + 2 O2S[c] + Q[c]				Oxydative phosphorilation	1	-1000	1000	0	2
r1539	quinol monooxygenase (menaquinol 8)	menaquinol[c] + 2 O2[c] <=> 2 H[c] + Menaquinone[c] + 2 O2S[c]				Oxydative phosphorilation	1	-1000	1000	0	2
r1540	NAD(P)H dehydrogenase (quinone)	Menaquinone[c] + H[c] + NADH[c] => menaquinol[c] + NAD[c]	(SACE_2881) or (SACE_4002)	SACE_2881,SACE_4002		Ubiquinone biosynthesis	0	0	1000	0	2	1.6.5.2
r1541	energy metabolism	NADH[c] + 0.5 O2[c] + 1.5 ADP[c] + 1.5 Orthophosphate[c] + H[c] <=> 1.5 ATP[c] + 3.5 H2O[c] + NAD[c]				Energy	1	-1000	1000	0	2		corynebacterium electron transport chain
r1542	energy metabolism	FADH2[c] + 0.5 O2[c] + ADP[c] + Orthophosphate[c] <=> ATP[c] + 2.5 H2O[c] + FAD[c]				Energy	1	-1000	1000	0	2		corynebacterium electron transport chain
ATP maintenance	SACE_1213Ham1-like protein	ATP[c] + H2O[c] <=> ADP[c] + Orthophosphate[c]				ATP maintenance	0	0	1000	0	2	3.6.1.15
r1544	delta-N-ornithine monooxygenase	L-Ornithine[c] + NADPH[c] + H[c] + 2 O2[c] <=> L-delta-N-hydroxyornithine[c] + NADP[c] + H2O[c]	(SACE_3033)	SACE_3033		Biosynthesis of Erythrochelin	1	-1000	1000	0	2		reaction added for erythrochelin biosynthesis
r1545		L-delta-N-hydroxyornithine[c] + Malonyl-CoA[c] <=> L-delta-N-acetyl-delta-N-hydroxyornithine[c] + CoA[c] + CO2[c]				Biosynthesis of Erythrochelin	1	-1000	1000	0	2		reaction added for erythrochelin biosynthesis, We arbitrarily chose malonyl-CoA rather than acetyl-CoA as acyl donor
r1546	NRPS - Non ribosomal peptide synthase	L-delta-N-acetyl-delta-N-hydroxyornithine[c] + Acetyl-CoA[c] + L-Serine[c] + 2 L-delta-N-hydroxyornithine[c] <=> Erythrochelin[c] + CoA[c]	(SACE_3035)	SACE_3035		Biosynthesis of Erythrochelin	1	-1000	1000	0	2		reaction added for erythrochelin biosynthesis
r1547	type III PKS	5 Malonyl-CoA[c] <=> 1,3,6,8-naphtalenetetrol[c] + 6 CO2[c] + 5 CoA[c]	(SACE_1241 and SACE_1242 and SACE_1243 and SACE_1244)	SACE_1241,SACE_1242,SACE_1243,SACE_1244		Biosynthesis of Flaviolin	1	-1000	1000	0	2		reaction added for flaviolin biosynthesis
r1548	type III PKS	1,3,6,8-naphtalenetetrol[c] + O2[c] <=> Flaviolin[c] + H2O[c]	(SACE_1241 and SACE_1242 and SACE_1243 and SACE_1245)	SACE_1241,SACE_1242,SACE_1243,SACE_1245		Biosynthesis of Flaviolin	1	-1000	1000	0	2		reaction added for flaviolin biosynthesis
r1549	flaviolin,NADPH:oxygen oxidoreductase	2 Flaviolin[c] + NADPH[c] + H[c] + O2[c] <=> Biflaviolin[c] + NADP[c] + 2 H2O[c]	(SACE_1241 and SACE_1242 and SACE_1243 and SACE_1246)	SACE_1241,SACE_1242,SACE_1243,SACE_1246		Biosynthesis of Flaviolin	1	-1000	1000	0	2	1.14.21.7	reaction added for flaviolin biosynthesis and modified
r1550	GPP methyl transferase	grdp[c] + amet[c] <=> 2-methylgrdp[c] + ahcys[c]	(SACE_3721 and SACE_3722)	SACE_3721,SACE_3722		Biosynthesis of 2-Methylisoborneol	1	-1000	1000	0	2		reaction added for 2-Methylisoborneol biosynthesis
r1551	2-Methylisoborneol synthase	2-methylgrdp[c] + H2O[c] <=> 2-Methylisoborneol[c] + Diphosphate[c]	(SACE_3721 and SACE_3723)	SACE_3721,SACE_3723		Biosynthesis of 2-Methylisoborneol	1	-1000	1000	0	2		reaction added for 2-Methylisoborneol biosynthesis
ATP_biomass	RNA biosynthesis	ATP[c] <=> ATP_biomass[c] + Diphosphate[c]				Biomass of RNA	1	-1000	1000	0	2
GTP_biomass	RNA biosynthesis	GTP[c] <=> GTP_biomass[c] + Diphosphate[c]				Biomass of RNA	1	-1000	1000	0	2
CTP_biomass	RNA biosynthesis	CTP[c] <=> CTP_biomass[c] + Diphosphate[c]				Biomass of RNA	1	-1000	1000	0	2
UTP_biomass	RNA biosynthesis	UTP[c] <=> UTP_biomass[c] + Diphosphate[c]				Biomass of RNA	1	-1000	1000	0	2
RNA_biomass	RNA biosynthesis	0.754 ATP_biomass[c] + 1.007 GTP_biomass[c] + 0.692 CTP_biomass[c] + 0.630 UTP_biomass[c] + 1.25 ATP[c] <=> RNA_biomass[c] + 1.25 ADP[c] + 1.25 Orthophosphate[c]				Biomass of RNA	1	-1000	1000	0	2
dATP_biomass	DNA biosynthesis	dATP[c] <=> dATP_biomass[c] + Diphosphate[c]				Biomass of DNA	1	-1000	1000	0	2
dGTP_biomass	DNA biosynthesis	dGTP[c] <=> dGTP_biomass[c] + Diphosphate[c]				Biomass of DNA	1	-1000	1000	0	2
dCTP_biomass	DNA biosynthesis	dCTP[c] <=> dCTP_biomass[c] + Diphosphate[c]				Biomass of DNA	1	-1000	1000	0	2
dTTP_biomass	DNA biosynthesis	dTTP[c] <=> dTTP_biomass[c] + Diphosphate[c]				Biomass of DNA	1	-1000	1000	0	2
DNA_biomass	DNA biosynthesis	0.448 dATP_biomass[c] + 1.169 dGTP_biomass[c] + 1.169 dCTP_biomass[c] + 0.448 dTTP_biomass[c] + 4.4 ATP[c] <=> DNA_biomass[c] + 4.4 ADP[c] + 4.4 Orthophosphate[c]				Biomass of DNA	1	-1000	1000	0	2
L-Glutamine_biomass	protein biosynthesis	Glutaminyl-tRNA(Gln)[c] <=> L-Glutamine_biomass[c] + tRNA(Gln)[c]				Biomass of Protein	1	-1000	1000	0	2
L-Alanine_biomass	protein biosynthesis	L-Alanyl-tRNA[c] <=> L-Alanine_biomass[c] + tRNA(Ala)[c]				Biomass of Protein	1	-1000	1000	0	2
L-Asparagine_biomass	protein biosynthesis	L-Asparaginyl-tRNA(Asn)[c] <=> L-Asparagine_biomass[c] + tRNA(Asn)[c]				Biomass of Protein	1	-1000	1000	0	2
Glycine_biomass	protein biosynthesis	Glycyl-tRNA(Gly)[c] <=> Glycine_biomass[c] + tRNA(Gly)[c]				Biomass of Protein	1	-1000	1000	0	2
L-Serine_biomass	protein biosynthesis	L-Seryl-tRNA(Ser)[c] <=> L-Serine_biomass[c] + tRNA(Ser)[c]				Biomass of Protein	1	-1000	1000	0	2
L-Threonine_biomass	protein biosynthesis	L-Threonyl-tRNA(Thr)[c] <=> L-Threonine_biomass[c] + tRNA(Thr)[c]				Biomass of Protein	1	-1000	1000	0	2
L-Methionine_biomass	protein biosynthesis	L-Methionyl-tRNA(Met)[c] <=> L-Methionine_biomass[c] + tRNA(Met)[c]				Biomass of Protein	1	-1000	1000	0	2
L-Cysteine_biomass	protein biosynthesis	L-Cysteinyl-tRNA(Cys)[c] <=> L-Cysteine_biomass[c] + tRNA(Cys)[c]				Biomass of Protein	1	-1000	1000	0	2
L-Valine_biomass	protein biosynthesis	L-Valyl-tRNA(Val)[c] <=> L-Valine_biomass[c] + tRNA(Val)[c]				Biomass of Protein	1	-1000	1000	0	2
L-Leucine_biomass	protein biosynthesis	L-Leucyl-tRNA(Leu)[c] <=> L-Leucine_biomass[c] + tRNA(Leu)[c]				Biomass of Protein	1	-1000	1000	0	2
L-Isoleucine_biomass	protein biosynthesis	L-Isoleucyl-tRNA(Ile)[c] <=> L-Isoleucine_biomass[c] + tRNA(Ile)[c]				Biomass of Protein	1	-1000	1000	0	2
L-Glutamine_biomass	protein biosynthesis	Glutaminyl-tRNA(Gln)[c] <=> L-Glutamine_biomass[c] + tRNA(Gln)[c]				Biomass of Protein	1	-1000	1000	0	2
L-Arginine_biomass	protein biosynthesis	L-Arginyl-tRNA(Arg)[c] <=> L-Arginine_biomass[c] + tRNA(Arg)[c]				Biomass of Protein	1	-1000	1000	0	2
L-Proline_biomass	protein biosynthesis	L-Prolyl-tRNA(Pro)[c] <=> L-Proline_biomass[c] + tRNA(Pro)[c]				Biomass of Protein	1	-1000	1000	0	2
L-Lysine_biomass	protein biosynthesis	L-Lysyl-tRNA(Lys)[c] <=> L-Lysine_biomass[c] + tRNA(Lys)[c]				Biomass of Protein	1	-1000	1000	0	2
L-Histidine_biomass	protein biosynthesis	L-Histidyl-tRNA(His)[c] <=> L-Histidine_biomass[c] + tRNA(His)[c]				Biomass of Protein	1	-1000	1000	0	2
L-Phenylalanine_biomass	protein biosynthesis	L-Phenylalanyl-tRNA(Phe)[c] <=> L-Phenylalanine_biomass[c] + tRNA(Phe)[c]				Biomass of Protein	1	-1000	1000	0	2
L-Tyrosine_biomass	protein biosynthesis	L-Tyrosyl-tRNA(Tyr)[c] <=> L-Tyrosine_biomass[c] + tRNA(Tyr)[c]				Biomass of Protein	1	-1000	1000	0	2
L-Tryptophan_biomass	protein biosynthesis	L-Tryptophanyl-tRNA(Trp)[c] <=> L-Tryptophan_biomass[c] + tRNA(Trp)[c]				Biomass of Protein	1	-1000	1000	0	2
L-Aspartate_biomass	protein biosynthesis	L-Aspartyl-tRNA(Asp)[c] <=> L-Aspartate_biomass[c] + tRNA(Asp)[c]				Biomass of Protein	1	-1000	1000	0	2
Protein_biomass	protein biosynthesis	1.805 L-Alanine_biomass[c] + 0.526 L-Aspartate_biomass[c] + 0.521 L-Asparagine_biomass[c] + 0.177 L-Glutamate_biomass[c] + 0.712 L-Glutamine_biomass[c] + .620 Glycine_biomass[c] + 0.835 L-Proline_biomass[c] + 0.614 L-Serine_biomass[c] + 0.191 L-Valine_biomass[c] + 0.899 L-Isoleucine_biomass[c] + 0.156 L-Leucine_biomass[c] + 0.055 L-Arginine_biomass[c] + 0.551 L-Threonine_biomass[c] + 0.157 L-Lysi…				Biomass of Protein	1	-1000	1000	0	2
Cardiolipin_biomass	phospholipid biosynthesis	Cardiolipin[c] <=> Cardiolipin_biomass[c]				Biomass of phospholipids	1	-1000	1000	0	2
Phosphatidylcholine_biomass	phospholipid biosynthesis	Phosphatidylcholine[c] <=> Phosphatidylcholine_biomass[c]				Biomass of phospholipids	1	-1000	1000	0	2
Phosphatidylglycerol_biomass	phospholipid biosynthesis	Phosphatidylglycerol[c] <=> Phosphatidylglycerol_biomass[c]				Biomass of phospholipids	1	-1000	1000	0	2
Phospholipids_biomass	phospholipid biosynthesis	0.052 Cardiolipin_biomass[c] + 1.089 Phosphatidylcholine_biomass[c] + 0.250 Phosphatidylglycerol_biomass[c] <=> Phospholipids_biomass[c]				Biomass of phospholipids	1	-1000	1000	0	2
TAG	triacylglycerol biosynthesis	glyc3p[c] + 3 fa[c] <=> TAG[c]				Biomass of Triacylglycerol	1	-1000	1000	0	2
TAG_biomass	triacylglycerol biosynthesis	TAG[c] <=> TAG_biomass[c]				Biomass of phospholipids	1	-1000	1000	0	2
fa		0.09 ttdca[c] + 0.29 ptdca[c] + 0.26 hdca[c] + 0.29 hpdca[c] + 0.06 ocdca[c] => fa[c]				Biomass of fa	0	0	1000	0	2		reaction added to specify fa composition****
UDP-N-acetylmuramate_biomass		UDP-N-acetylmuramate[c] <=> UDP-N-acetylmuramate_biomass[c]				Biomass of cell wall	1	-1000	1000	0	2
uacgam_biomass		uacgam[c] <=> uacgam_biomass[c]				Biomass of cell wall	1	-1000	1000	0	2
alaala_biomass		alaala[c] <=> alaala_biomass[c]				Biomass of cell wall	1	-1000	1000	0	2
26dap_M_biomass		26dap_M[c] <=> 26dap_M_biomass[c]				Biomass of cell wall	1	-1000	1000	0	2
D-Glutamate_biomass		D-Glutamate[c] <=> D-Glutamate_biomass[c]				Biomass of cell wall	1	-1000	1000	0	2
Peptidoglycan_biomass	peptidoglycan biosynthesis	0.983 UDP-N-acetylmuramate_biomass[c] + 1.311 uacgam_biomass[c] + 1.076 alaala_biomass[c] + 0.950 D-Alanine[c] + 1.093 26dap_M_biomass[c] + 0.874 D-Glutamate_biomass[c] + 0.874 Glycine_biomass[c] + 5.026 ATP[c] <=> Peptidoglycan_biomass[c] + 0.950 D-Alanine[c] + 1.197 UDP[c] + 1.007 UMP[c] + 5.026 ADP[c] + 5.026 Orthophosphate[c]				Biomass of cell wall	1	-1000	1000	0	2
udpgal_biomass		udpgal[c] <=> udpgal_biomass[c]				Biomass of cell wall	1	-1000	1000	0	2
Carbohydrate_biomass	carbohydrate biosynthesis	1.945 26dap_M_biomass[c] + 3.794 udpgal_biomass[c] <=> 3.794 UDP[c] + Carbohydrate_biomass[c]				Biomass of cell wall	1	-1000	1000	0	2
Polyglycerolphosphate	polyglycerolphosphate biosynthesis	12 ATP[c] + 12 Glycerol[c] <=> Polyglycerolphosphate[c] + 12 ADP[c] + 12 Orthophosphate[c]				Biomass of cell wall	1	-1000	1000	0	2
Polyglycerolphosphate_biomass		Polyglycerolphosphate[c] <=> Polyglycerolphosphate_biomass[c]				Biomass of cell wall	1	-1000	1000	0	2
Teich_biomass	teichoic acid biosynthesis	0.518 Polyglycerolphosphate_biomass[c] + 0.129 L-Lysine_biomass[c] + 0.129 uacgam_biomass[c] + 0.129 ATP[c] <=> Teich_biomass[c] + 0.129 UDP[c] + 0.129 ADP[c] + 0.129 Orthophosphate[c]				Biomass of cell wall	1	-1000	1000	0	2
NAD_biomass	cofactor biosynthesis	NAD[c] <=> NAD_biomass[c]				Biomass of small molecules	1	-1000	1000	0	2
NADP_biomass	cofactor biosynthesis	NADP[c] <=> NADP_biomass[c]				Biomass of small molecules	1	-1000	1000	0	2
CoA_biomass	cofactor biosynthesis	CoA[c] <=> CoA_biomass[c]				Biomass of small molecules	1	-1000	1000	0	2
ACP_biomass	cofactor biosynthesis	ACP[c] <=> ACP_biomass[c]				Biomass of small molecules	1	-1000	1000	0	2
Menaquinone_biomass	cofactor biosynthesis	Menaquinone[c] <=> Menaquinone_biomass[c]				Biomass of small molecules	1	-1000	1000	0	2
Tetrahydrofolate_biomass	cofactor biosynthesis	Tetrahydrofolate[c] <=> Tetrahydrofolate_biomass[c]				Biomass of small molecules	1	-1000	1000	0	2
FAD_biomass	cofactor biosynthesis	FAD[c] <=> FAD_biomass[c]				Biomass of small molecules	1	-1000	1000	0	2
FMN_biomass	cofactor biosynthesis	FMN[c] <=> FMN_biomass[c]				Biomass of small molecules	1	-1000	1000	0	2
Cofactor_biomass	cofactor biosynthesis	0.188 NAD_biomass[c] + 0.168 NADP_biomass[c] + 0.163 CoA_biomass[c] + 0.012 ACP_biomass[c] + 0.146 Menaquinone_biomass[c] + 0.281 Tetrahydrofolate_biomass[c] + 0.274 FMN_biomass[c] + 0.159 FAD_biomass[c] <=> Cofactor_biomass[c]				Biomass of small molecules	1	-1000	1000	0	2
biomass	biomass biosynthesis	0.412 Protein_biomass[c] + 0.167 RNA_biomass[c] + 0.036 DNA_biomass[c] + 0.027 Phospholipids_biomass[c] + 0.018 TAG_biomass[c] + 0.125 Peptidoglycan_biomass[c] + 0.064 Carbohydrate_biomass[c] + 0.031 Teich_biomass[c] + 0.03 Cofactor_biomass[c] + 16 ATP[c] <=> biomass[c] + 16 ADP[c] + 16 Orthophosphate[c]				Biomass synthesis	1	-1000	1000	0	2
r1611		Erythrochelin =>				exchange reaction	0	0	1000	0	2
r1612		5-Hydroxyectoine =>				exchange reaction	0	0	1000	0	2
r1613		Biflaviolin =>				exchange reaction	0	0	1000	0	2
r1614		2-Methylisoborneol =>				exchange reaction	0	0	1000	0	2
r1615		D-Xylose =>				exchange reaction	0	0	1000	0	2
r1616		Mannitol =>				exchange reaction	0	0	1000	0	2
r1617		L-Rhamnose =>				exchange reaction	0	0	1000	0	2
r1618		L-Arabinose =>				exchange reaction	0	0	1000	0	2
r1619		D-Mannose =>				exchange reaction	0	0	1000	0	2
r1620		D-Fructose =>				exchange reaction	0	0	1000	0	2
r1621		Raffinose =>				exchange reaction	0	0	1000	0	2
r1622		D-Galactose =>				exchange reaction	0	0	1000	0	2
r1623		inost =>				exchange reaction	0	0	1000	0	2
r1624		Melibiose =>				exchange reaction	0	0	1000	0	2
r1625		Sucrose =>				exchange reaction	0	0	1000	0	2
r1626		D-Ribose =>				exchange reaction	0	0	1000	0	2
r1627		alpha,alpha-Trehalose =>				exchange reaction	0	0	1000	0	2
r1628		Maltose =>				exchange reaction	0	0	1000	0	2
r1629		Lactose =>				exchange reaction	0	0	1000	0	2
r1630		Pyruvate =>				exchange reaction	0	0	1000	0	2
r1631		2-Oxoglutarate =>				exchange reaction	0	0	1000	0	2
r1632		Succinate =>				exchange reaction	0	0	1000	0	2
r1633		Fumarate =>				exchange reaction	0	0	1000	0	2
r1634		Acetate =>				exchange reaction	0	0	1000	0	2
r1635		Propanoate =>				exchange reaction	0	0	1000	0	2
r1636		Citrate =>				exchange reaction	0	0	1000	0	2
r1637		(S)-Malate =>				exchange reaction	0	0	1000	0	2
r1638		(S)-Lactate =>				exchange reaction	0	0	1000	0	2
r1639		Hypoxanthine =>				exchange reaction	0	0	1000	0	2
r1640		Xanthine =>				exchange reaction	0	0	1000	0	2
r1641		Salicin =>				exchange reaction	0	0	1000	0	2
r1642		L-Valine =>				exchange reaction	0	0	1000	0	2
r1643		L-Threonine =>				exchange reaction	0	0	1000	0	2
r1644		L-Isoleucine =>				exchange reaction	0	0	1000	0	2
r1645		L-Leucine =>				exchange reaction	0	0	1000	0	2
r1646		L-Methionine =>				exchange reaction	0	0	1000	0	2
r1647		L-Aspartate =>				exchange reaction	0	0	1000	0	2
r1648		L-Glutamine =>				exchange reaction	0	0	1000	0	2
r1649		L-Phenylalanine =>				exchange reaction	0	0	1000	0	2
r1650		L-Glutamate =>				exchange reaction	0	0	1000	0	2
r1651		L-Serine =>				exchange reaction	0	0	1000	0	2
r1652		L-Proline =>				exchange reaction	0	0	1000	0	2
r1653		Glycine =>				exchange reaction	0	0	1000	0	2
r1654		L-Lysine =>				exchange reaction	0	0	1000	0	2
r1655		L-Histidine =>				exchange reaction	0	0	1000	0	2
r1656		L-Cysteine =>				exchange reaction	0	0	1000	0	2
r1657		L-Asparagine =>				exchange reaction	0	0	1000	0	2
r1658		L-Alanine =>				exchange reaction	0	0	1000	0	2
r1659		L-Arginine =>				exchange reaction	0	0	1000	0	2
r1660		L-Tyrosine =>				exchange reaction	0	0	1000	0	2
r1661		L-Tryptophan =>				exchange reaction	0	0	1000	0	2
r1662		Urea =>				exchange reaction	0	0	1000	0	2
r1663		4-Aminobutanoate =>				exchange reaction	0	0	1000	0	2
r1664		Biotin =>				exchange reaction	0	0	1000	0	2
r1665		Pantothenate =>				exchange reaction	0	0	1000	0	2
r1666		Folate =>				exchange reaction	0	0	1000	0	2
r1667		Nicotinate =>				exchange reaction	0	0	1000	0	2
r1668		Thiamin =>				exchange reaction	0	0	1000	0	2
r1669		Sulfate =>				exchange reaction	1	-1000	1000	0	2
r1670		ACP =>				exchange reaction	1	-1000	0	0	2
r1671		Choline =>				exchange reaction	1	-1000	0	0	2
r1672		Thioredoxin =>				exchange reaction	1	-1000	1000	0	2
r1673		pap =>				exchange reaction	0	0	1000	0	2
biomass_output		biomass =>				exchange reaction	0	0	1000	0	2
CO2_output		CO2 =>				exchange reaction	0	0	1000	0	2
Erythromycin_output		Erythromycin =>				exchange reaction	0	0	1000	0	2
Glucose_input		alpha-D-Glucose =>				exchange reaction	1	-1000	1000	0	2
H		H =>				exchange reaction	1	-1000	1000	0	2
H2O		H2O =>				exchange reaction	1	-1000	1000	0	2
h2s		h2s =>				exchange reaction	0	0	1000	0	2
NH3		NH3 =>				exchange reaction	1	-1000	0	0	2
O2_input		O2 =>				exchange reaction	1	-1000	1000	0	2
Orthophosphate		Orthophosphate =>				exchange reaction	1	-1000	0	0	2
Propanal_input		Propane-1-ol =>				exchange reaction	0	0	1000	0	2
